# Supplementary material for: An efficient and regioselective synthetic approach towards fluorinated quinolinylphosphonates
Source: Royal Society of Chemistry journal article supplement (doi:10.1039/c2ra21212a), 2012-01-01

# ELECTRONIC SUPPLEMENTARY INFORMATION

## An efficient and regioselective synthetic approach towards fluorinated quinolinyolphosphonates

Blazej Duda,<sup>[a]</sup> Sergey N. Tverdomed,<sup>\*,[a][b]</sup> and Gerd-Volker Rösenthaller<sup>\*,[a]</sup>

<sup>[a]</sup> School of Engineering and Science, Jacobs University Bremen, Campus Ring 1, 28759 Bremen, Germany; Email: g.roesenthaller@jacobs-university.de, and

<sup>[b]</sup> Department of Organic Chemistry, St. Petersburg State Institute of Technology, Moskovskii pr. 26, St. Petersburg 190013, Russia; Email: s.tverdomed@jacobs-university.de

### Table of Contents:

|                                                                                                                   |     |
|-------------------------------------------------------------------------------------------------------------------|-----|
| General Remarks                                                                                                   | S2  |
| Procedure for the preparation of imine derivatives <b>2a-d</b>                                                    | S3  |
| Copy of <sup>1</sup> H, <sup>13</sup> C and <sup>19</sup> F NMR spectra of compounds <b>2a-d</b>                  | S4  |
| Procedure for the preparation of CF <sub>2</sub> -containing quinolinyolphosphonates <b>4a-t</b>                  | S17 |
| Copy of <sup>1</sup> H, <sup>13</sup> C, <sup>19</sup> F and <sup>31</sup> P NMR spectra of compounds <b>4a-t</b> | S18 |
| Crystal data of compound <b>4c</b>                                                                                | S33 |

## General Remarks

All reagents from commercial suppliers were used without further purification. All solvents were freshly distilled before use from appropriate drying agents. All other reagents were recrystallized. Reactions were performed under atmosphere of dry argon. Analytical TLCs were performed with silica gel 60 F<sub>254</sub> plates. Column chromatography was carried out using silica gel 60 (230–400 mesh ASTM). Melting points were determined without correction. NMR spectra were obtained on a spectrometer operating at 400 MHz for <sup>1</sup>H (TMS), 376 MHz for <sup>19</sup>F (CFC1<sub>3</sub>), 161 MHz for <sup>31</sup>P (H<sub>3</sub>PO<sub>4</sub>) and 100 MHz for <sup>13</sup>C (TMS). All measurements were accomplished in the solution in CDCl<sub>3</sub>. Mass spectrometry was established on a MicroTOF-Q fitted with an ESI source.

### **Procedure for the Preparation of Imine Derivatives 2a-d.**

To the mixture of a nitrobenzaldehyde and  $\text{MgSO}_4$  in dry DCM a cyclohexylamine was added slowly. Then the suspension was refluxed for 4h, then cooled down to ambient temperature and filtered off the remained  $\text{MgSO}_4$ . The filtrate was next concentrated under reduced pressure to give pure imine derivative. Subsequently an imine was dissolved in ethanol and warmed up to 80 °C. To the hot solution solid  $\text{Na}_2\text{S}$  (hydrate) was slowly added. The solution was maintained for additional 20 min, cooled down to 0 °C and kept for 4h. Thus formed precipitate was filtered off and the solution concentrated under reduced pressure. To the crude product  $\text{H}_2\text{O}$  was added and a new drop of precipitate was formed, filtered off, washed with  $\text{H}_2\text{O}$  (3×100 mL) and dried to produce pure (2-(cyclohexylimino)-methyl)aniline derivatives.

1. 2-((cyclohexylimino)methyl)aniline **2a**

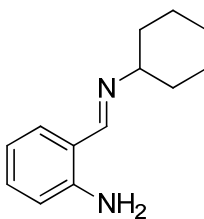

Yellowish solid (90%), Mp = 45–48 °C;  $^1\text{H}$  NMR (400 MHz,  $\text{CDCl}_3$ )  $\delta$  1.35–1.82 (m, 10H), 3.10 (m, 1H), 6.40 (br s, 2H), 6.62 (d,  $J = 8.3$  Hz, 1H), 6.66 (td,  $J = 7.5$  Hz,  $J = 1.3$  Hz, 1H), 7.11 (td,  $J = 7.2$  Hz,  $J = 1.9$  Hz, 1H), 7.18 (dd,  $J = 7.7$  Hz,  $J = 1.9$  Hz, 1H), 8.35 (s, 1H);  $^{13}\text{C}$  NMR (100 MHz)  $\delta$  24.7, 25.9, 35.0, 69.0, 115.4, 115.6, 118.0, 130.5, 133.3, 148.5, 161.5; HRMS (ESI): calcd for  $\text{C}_{13}\text{H}_{19}\text{N}_2$   $[\text{M}+\text{H}]^+$  203.1543, found 203.1543.

$^1\text{H}$  NMR

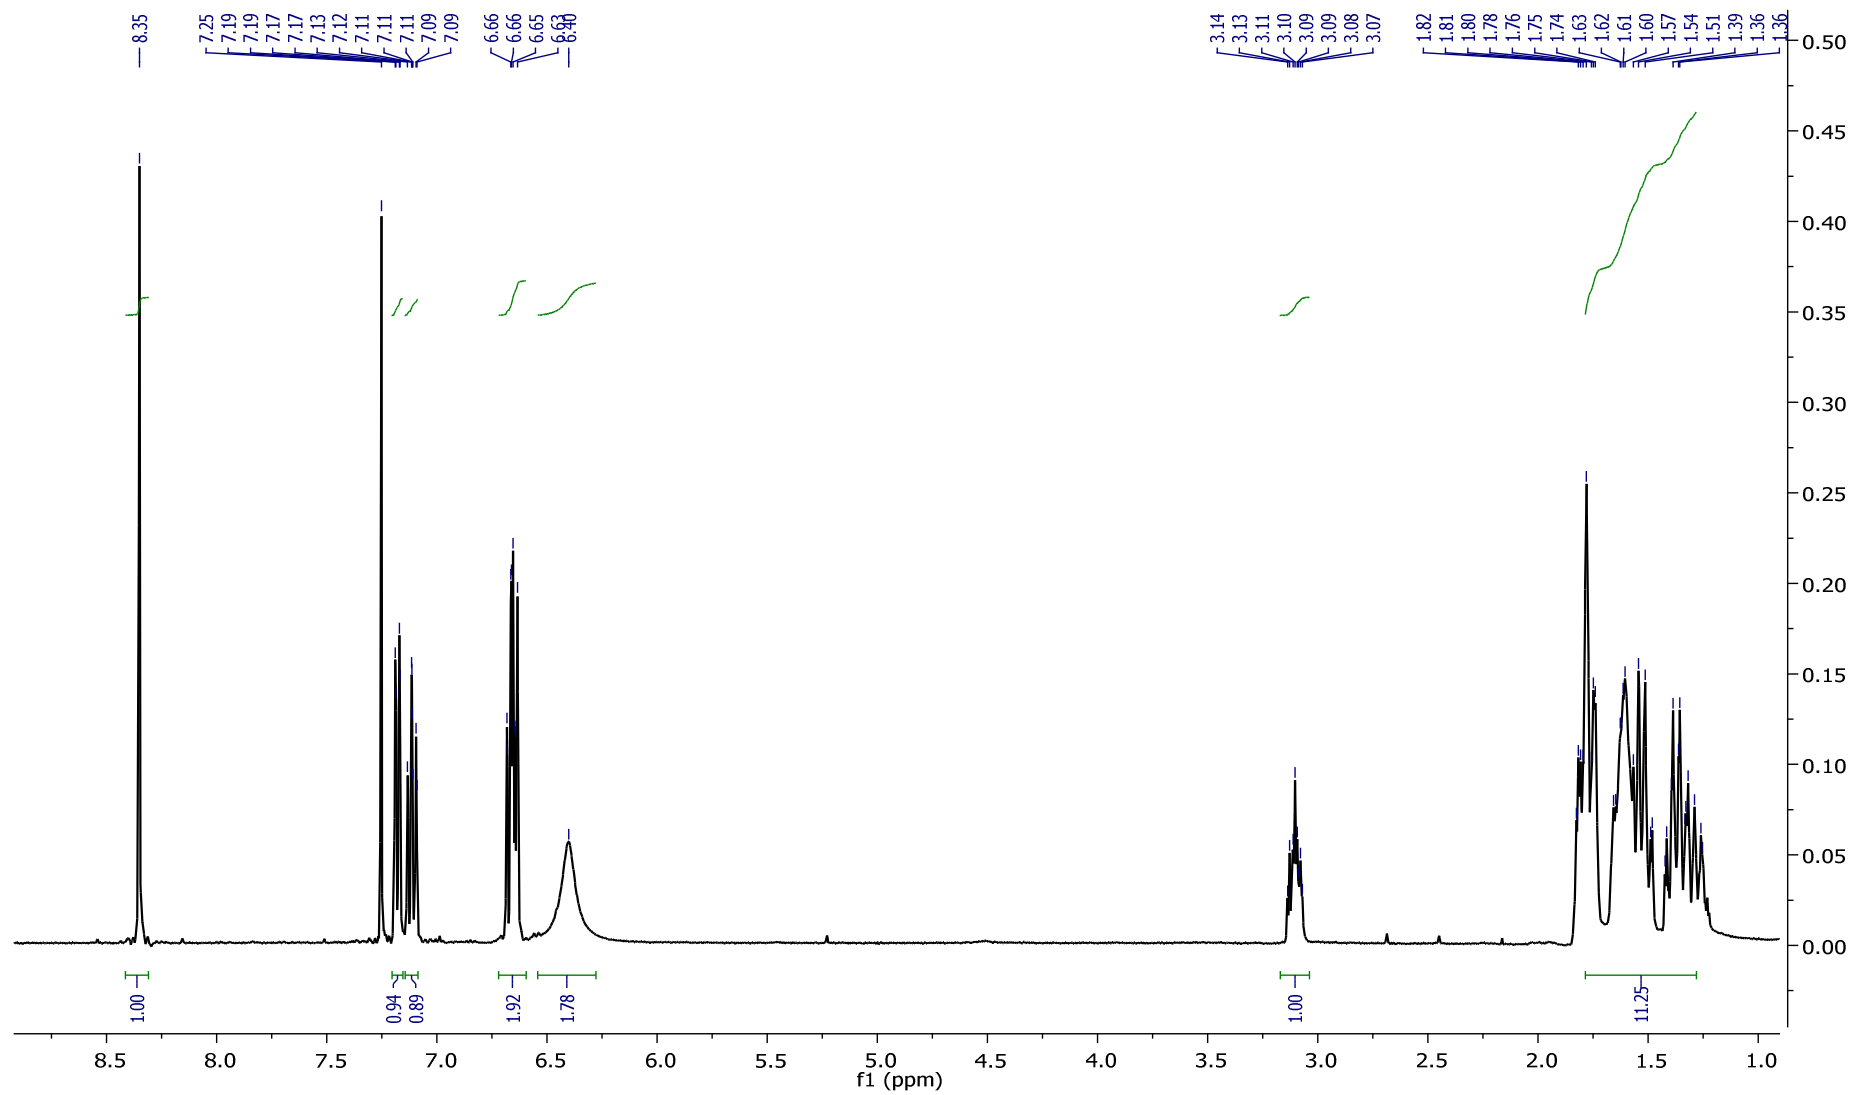

$^{13}\text{C}$  NMR

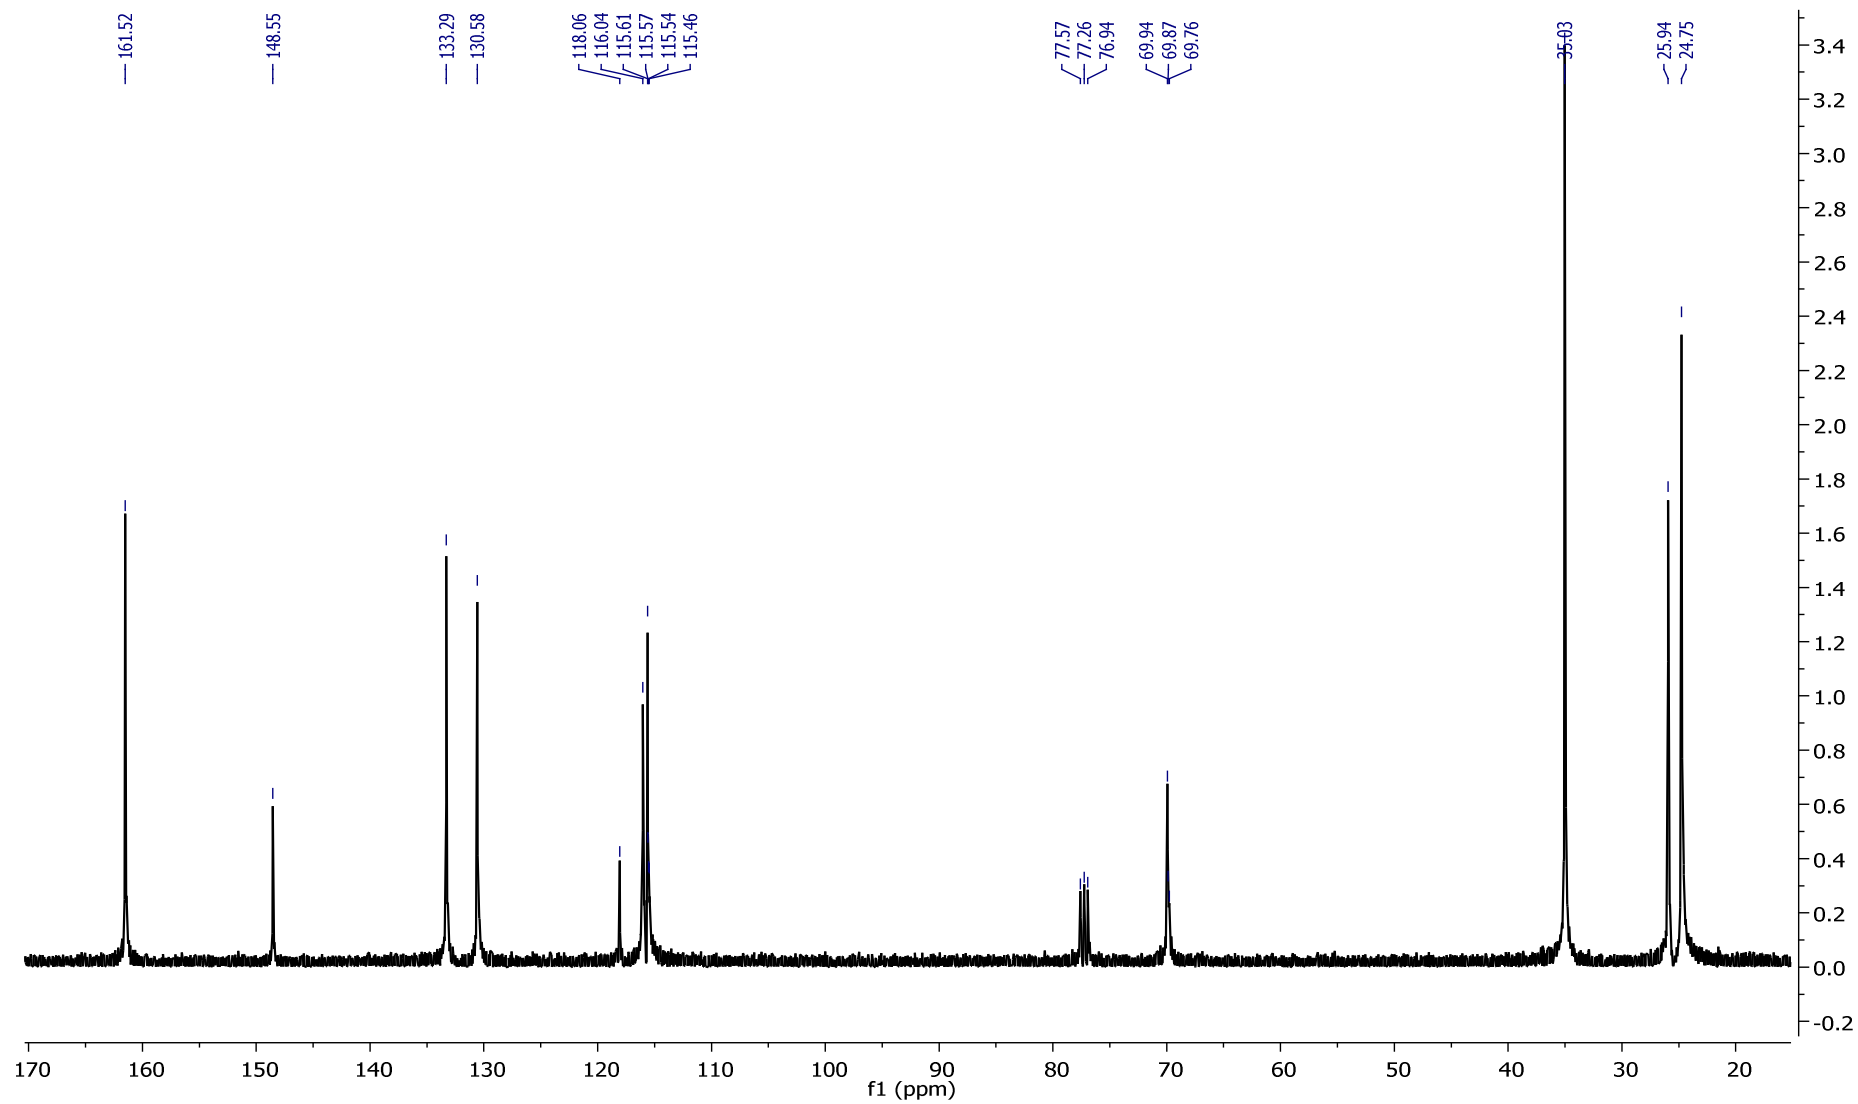

2. 4-chloro-2-((cyclohexylimino)methyl)aniline **2b**

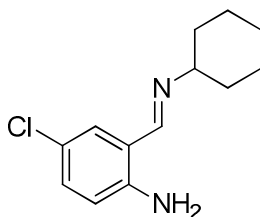

Yellowish solid (85%), Mp = 91–93 °C;  $^1\text{H}$  NMR (400 MHz,  $\text{CDCl}_3$ )  $\delta$  1.72–1.81 (m, 10H), 3.11 (m, 1H), 6.40 (br s, 2H), 6.57 (d,  $J = 9.5$  Hz, 1H), 7.05 (dd,  $J = 9.5$  Hz,  $J = 1.9$  Hz, 1H), 7.14 (d,  $J = 1.9$  Hz, 1H), 8.26 (s, 1H);  $^{13}\text{C}$  NMR (100 MHz)  $\delta$  24.6, 25.8, 34.9, 69.8, 116.8, 118.9, 120.3, 130.3, 132.3, 147.0, 160.2; HRMS (ESI): calcd for  $\text{C}_{13}\text{H}_{18}\text{ClN}_2$   $[\text{M}+\text{H}]^+$  237.1153, found 237.1146.

# <sup>1</sup>H NMR

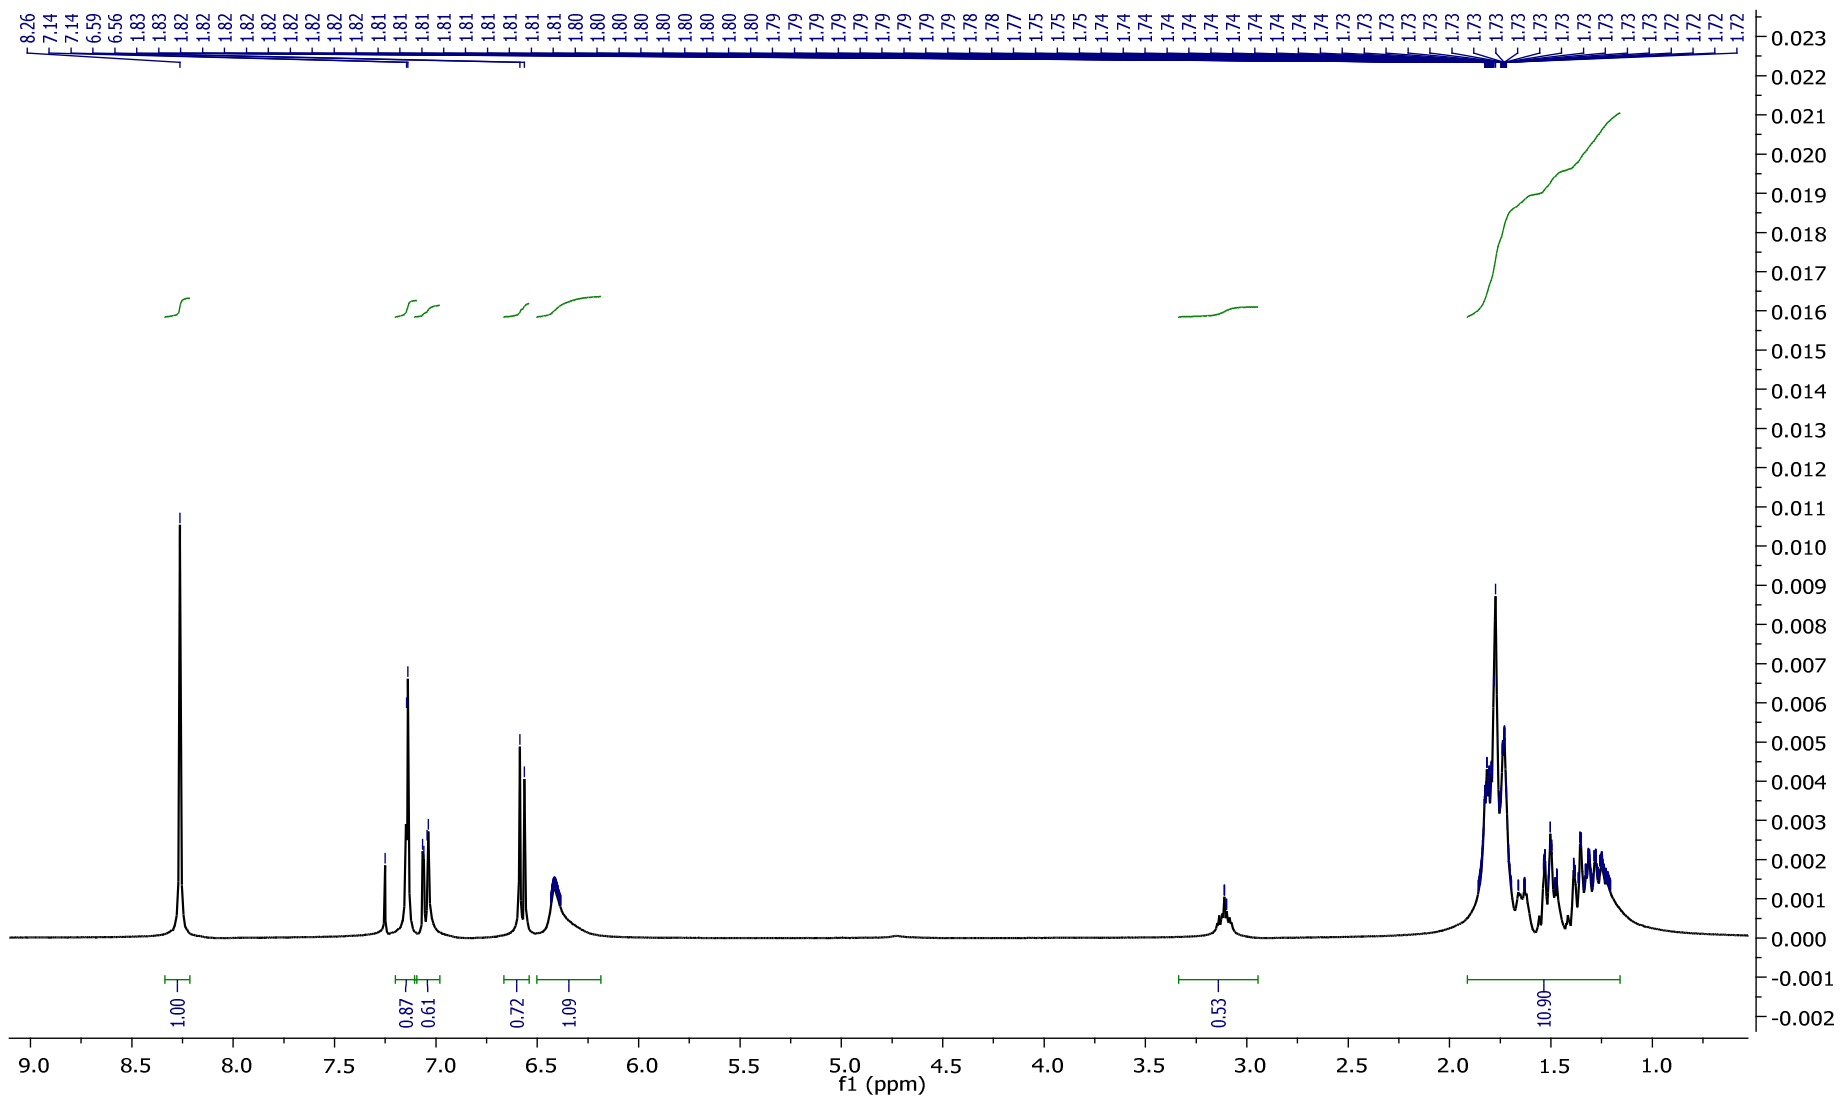



$^{13}\text{C}$  NMR

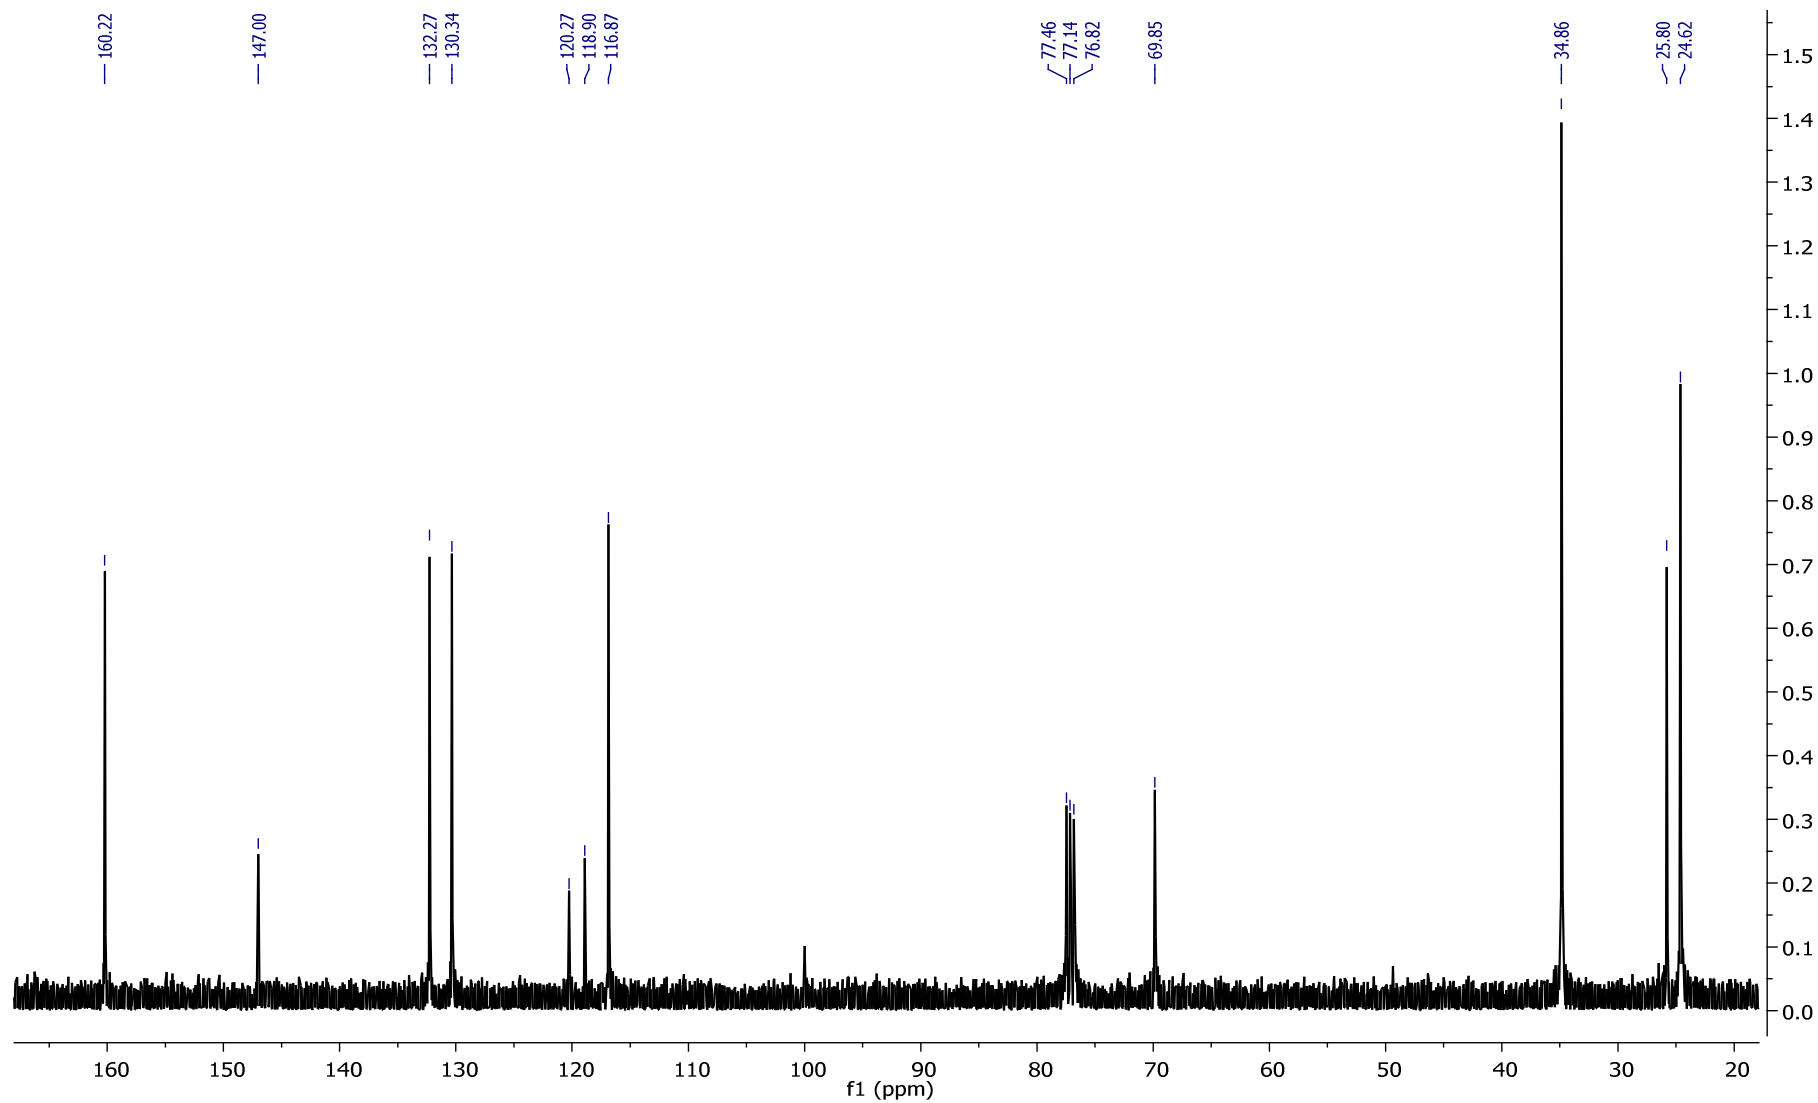

3. 2-((cyclohexylimino)methyl)-4,5-dimethoxyaniline **2c**

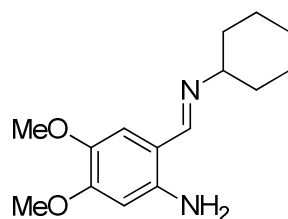

Yellowish solid (85%); Mp = 134–137 °C;  $^1\text{H}$  NMR (400 MHz,  $\text{CDCl}_3$ )  $\delta$  1.25–1.81 (m, 10H), 3.06 (m, 1H), 2.80 (s, 2H), 3.84 (s, 3H), 6.19 (s, 1H), 6.24 (br s, 2H), 6.69 (s, 1H), 8.25 (s, 1H);  $^{13}\text{C}$  NMR (100 MHz)  $\delta$  24.7, 25.8, 35.1, 55.8, 56.8, 69.7, 99.4, 110.1, 116.2, 140.4, 144.3, 151.7, 160.4; HRMS (ESI) calcd for  $\text{C}_{15}\text{H}_{23}\text{N}_2\text{O}_2$   $[\text{M}+\text{H}]^+$  263.1754, found 263.1751.

$^1\text{H}$  NMR

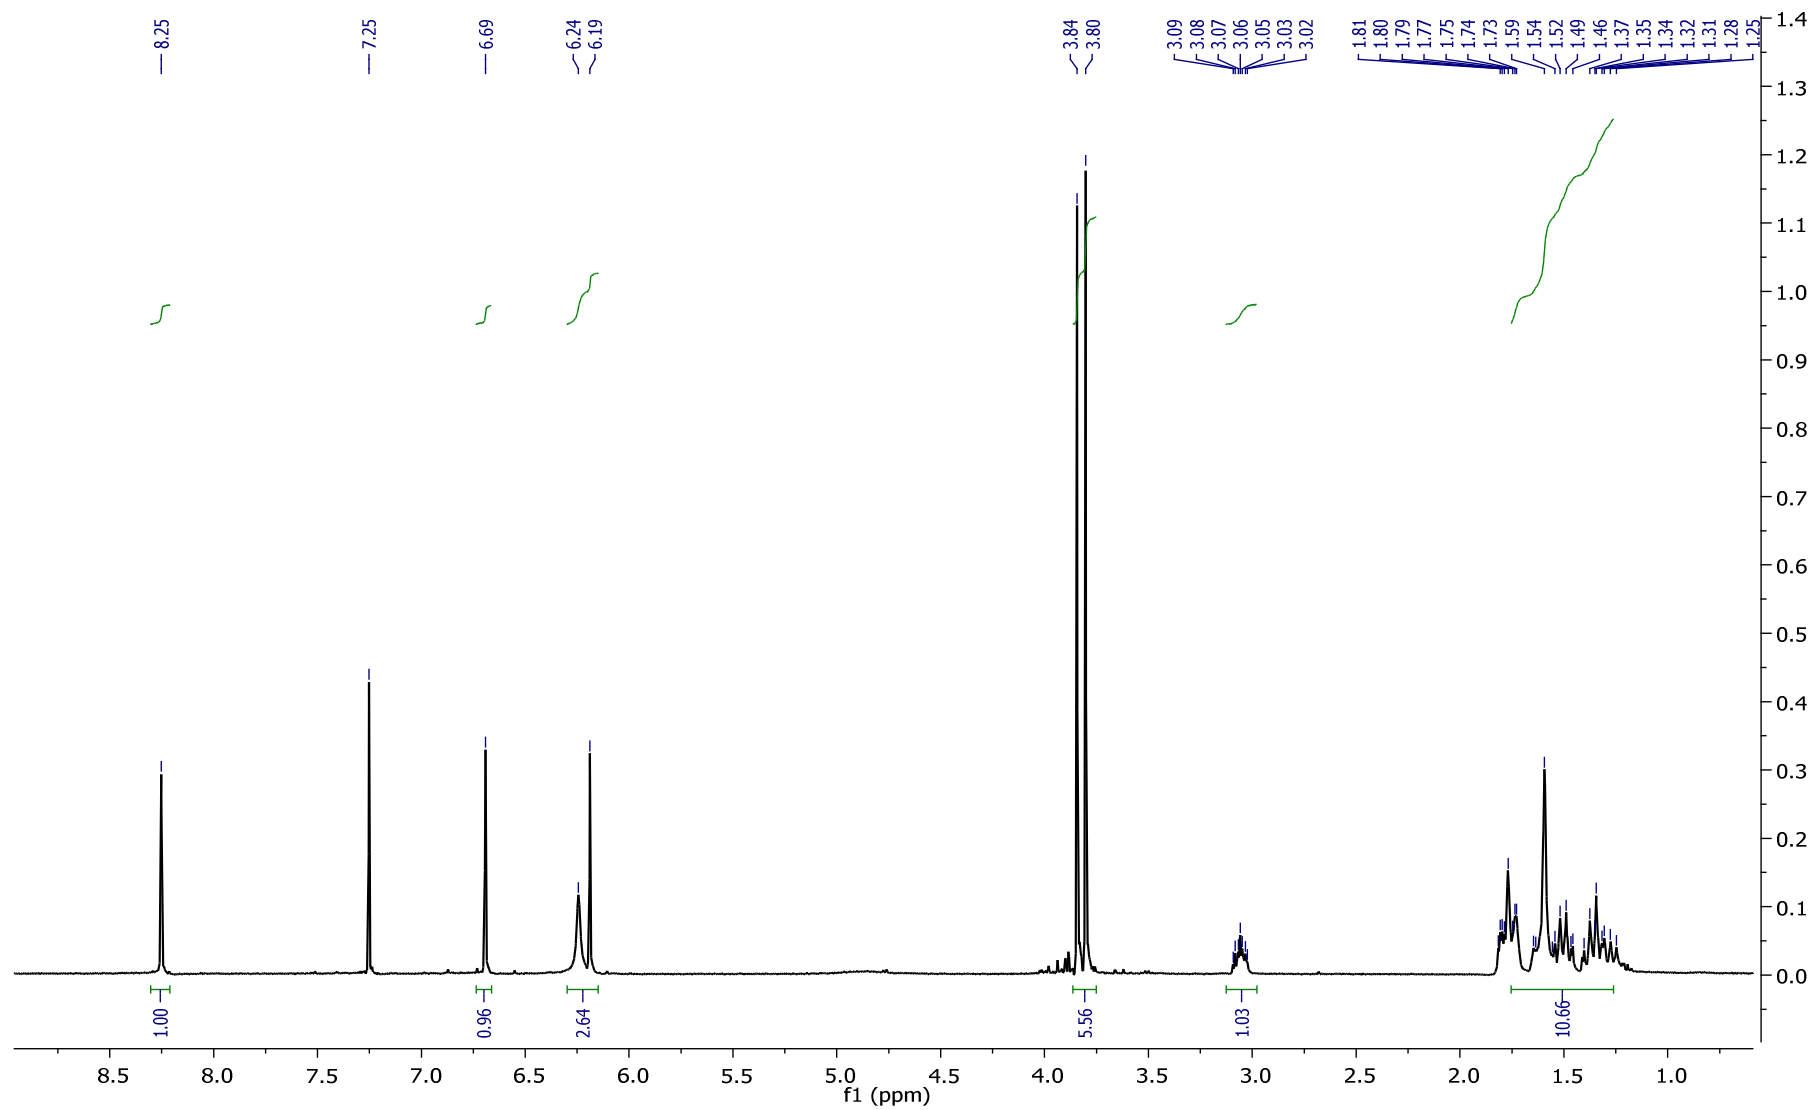

$^{13}\text{C}$  NMR

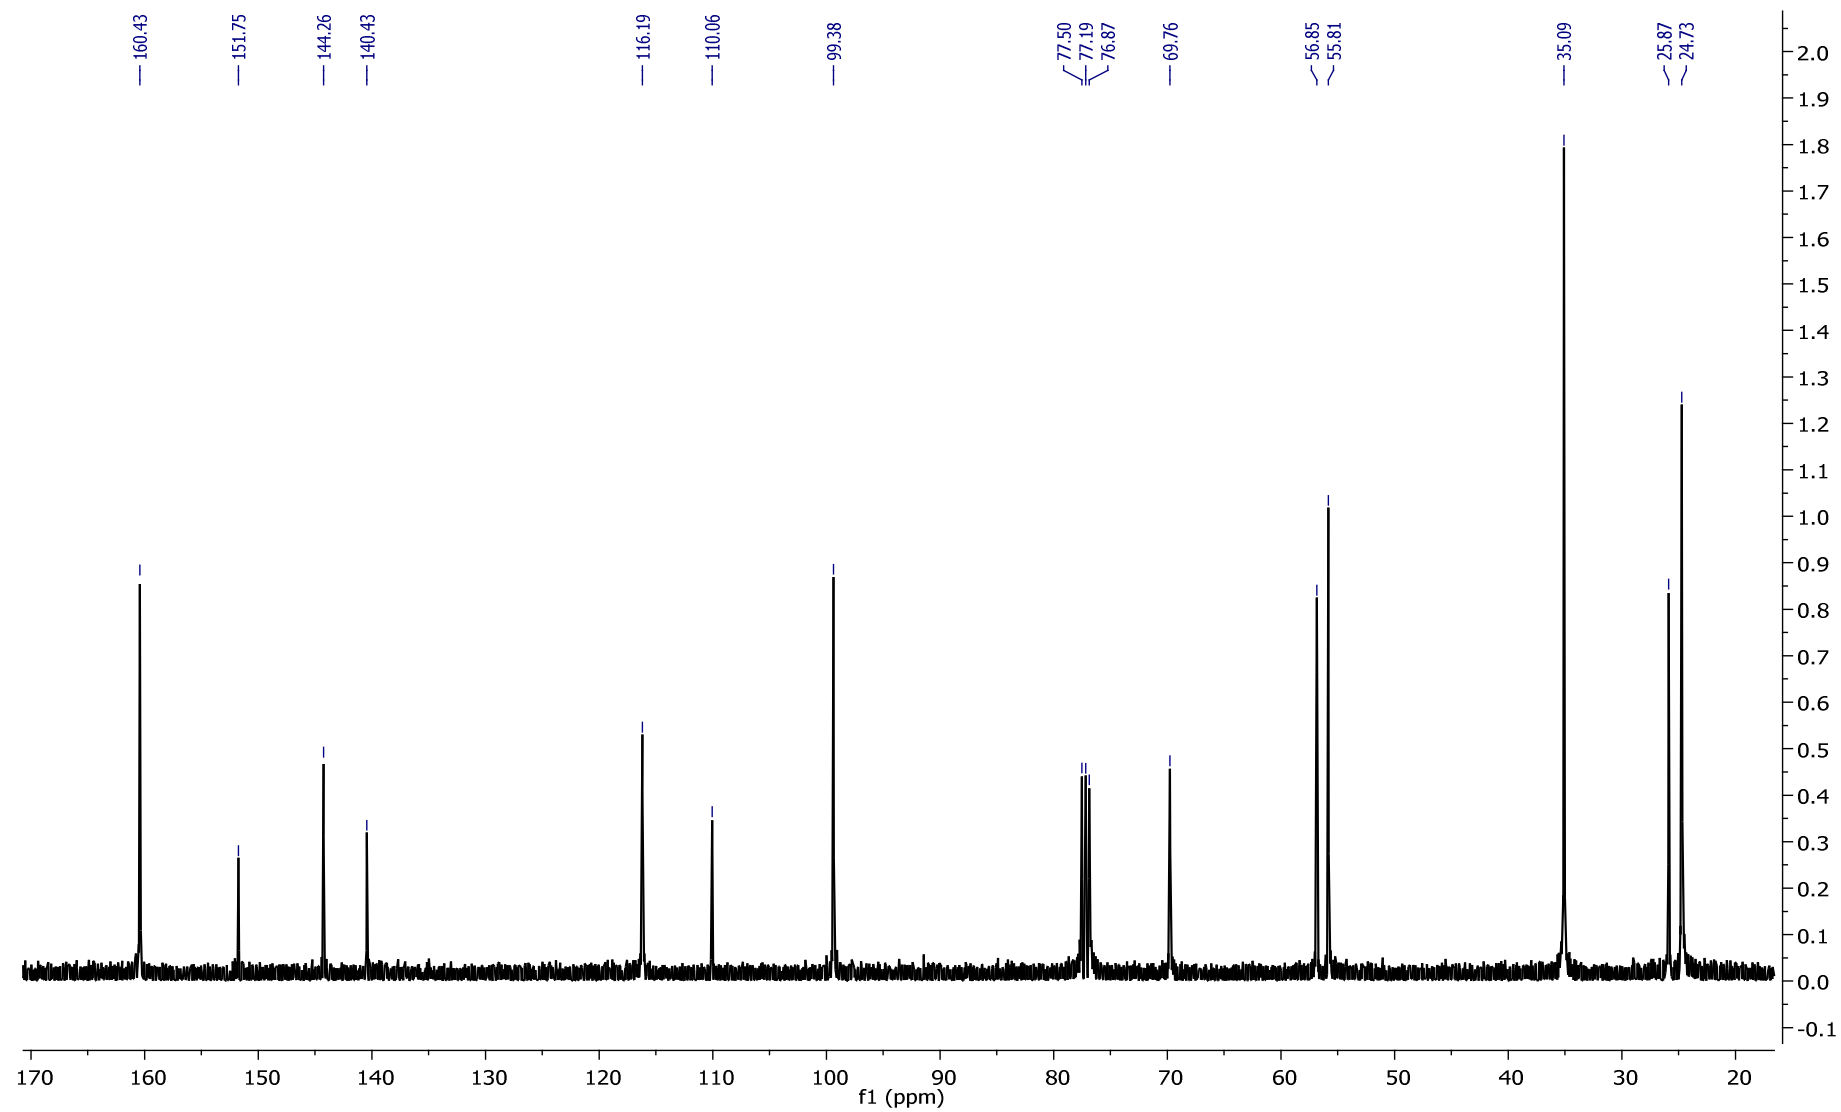

4. 2-((cyclohexylimino)methyl)-5-(trifluoromethyl)aniline **2d**.

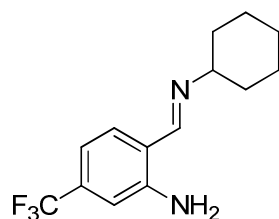

Yellowish crystals (80%); Mp = 60–63 °C;  $^1\text{H}$  NMR (400 MHz,  $\text{CDCl}_3$ )  $\delta$  1.53–1.84 (m, 10H), 3.14 (m, 1H), 6.64 (br s, 2H), 6.84 (m, 2H), 7.27 (s, 1H), 8.38 (s, 1H);  $^{13}\text{C}$  NMR (100 MHz)  $\delta$  24.6, 25.7, 34.8, 69.9, 112.3, 120.1, 123.5 (q,  $^1J_{\text{C-F}} = 275.1$  Hz), 131.5 (q,  $^2J_{\text{C-F}} = 30.5$  Hz), 133.6, 148.4, 160.5;  $^{19}\text{F}$  NMR (376 MHz)  $\delta$  -63.1; HRMS (ESI): calcd for  $\text{C}_{14}\text{H}_{18}\text{F}_3\text{N}_2$   $[\text{M}+\text{H}]^+$  271.1417, found 271.1412.

<sup>1</sup>H NMR

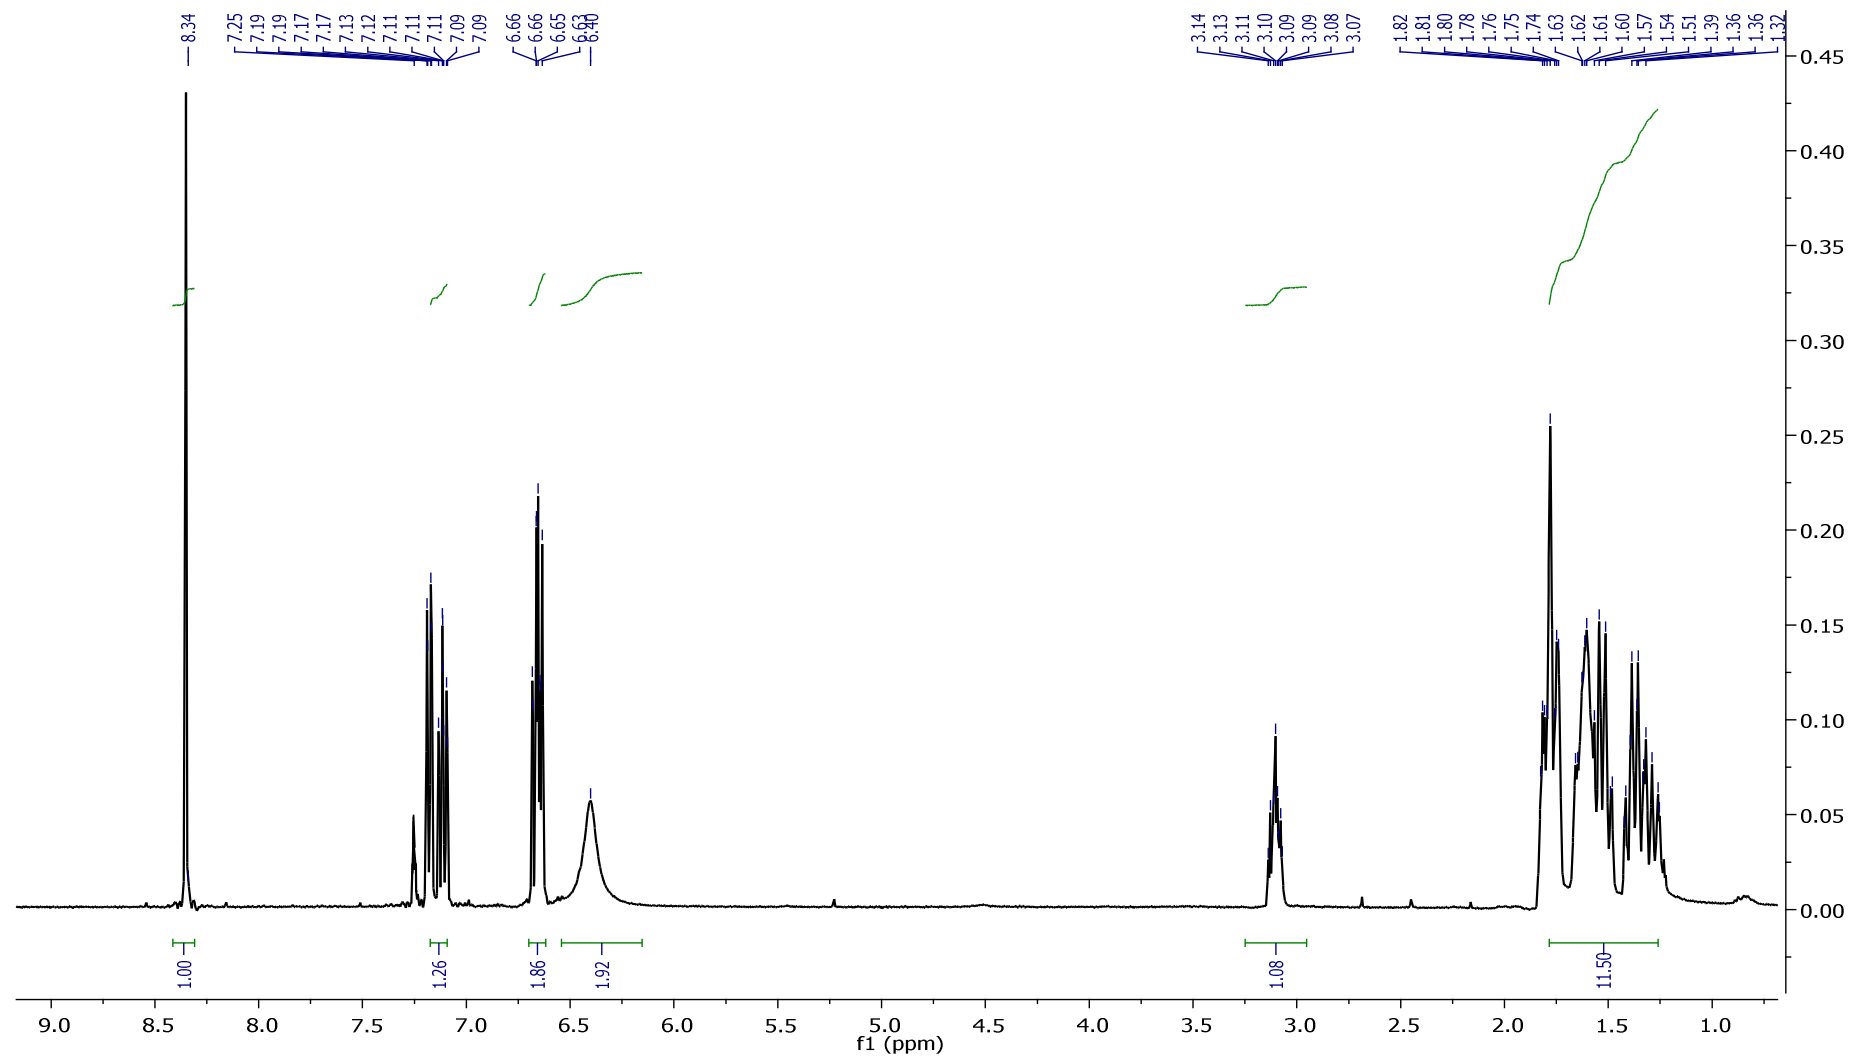

$^{13}\text{C}$  NMR

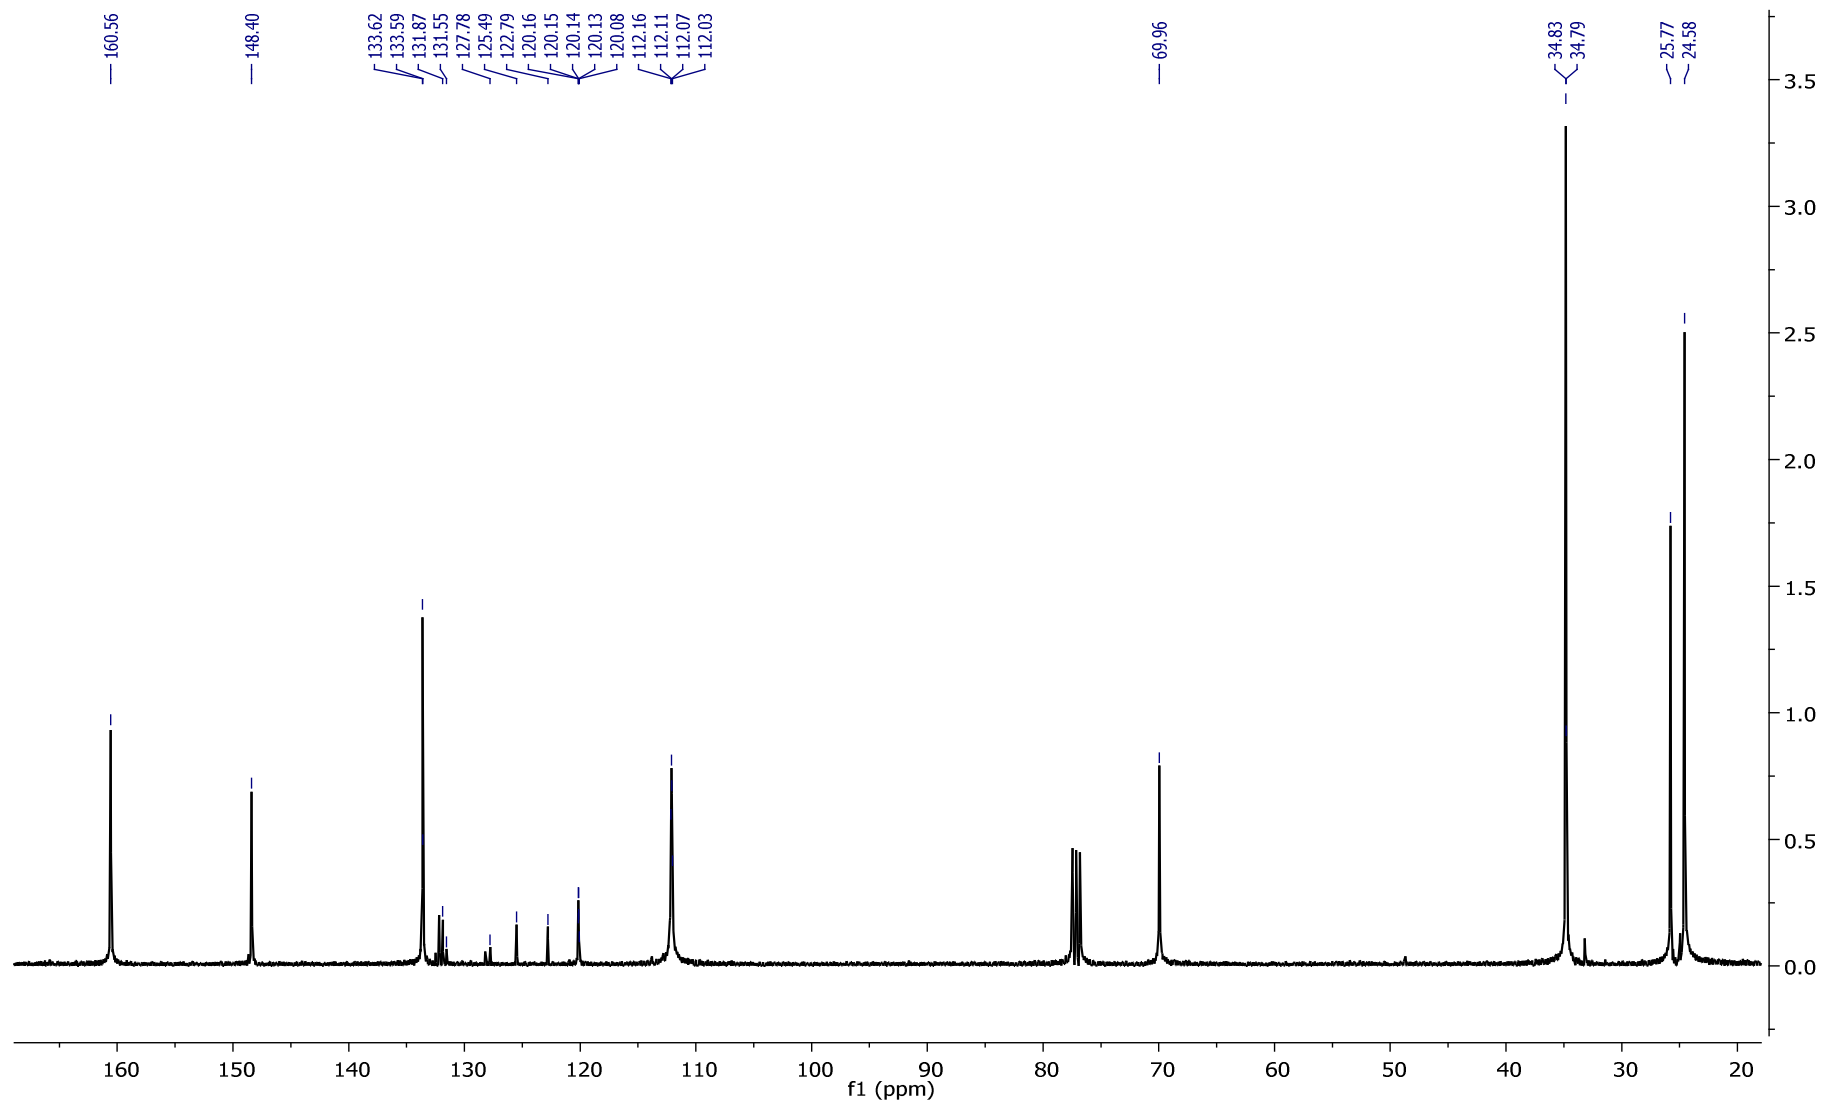

$^{19}\text{F}$  NMR

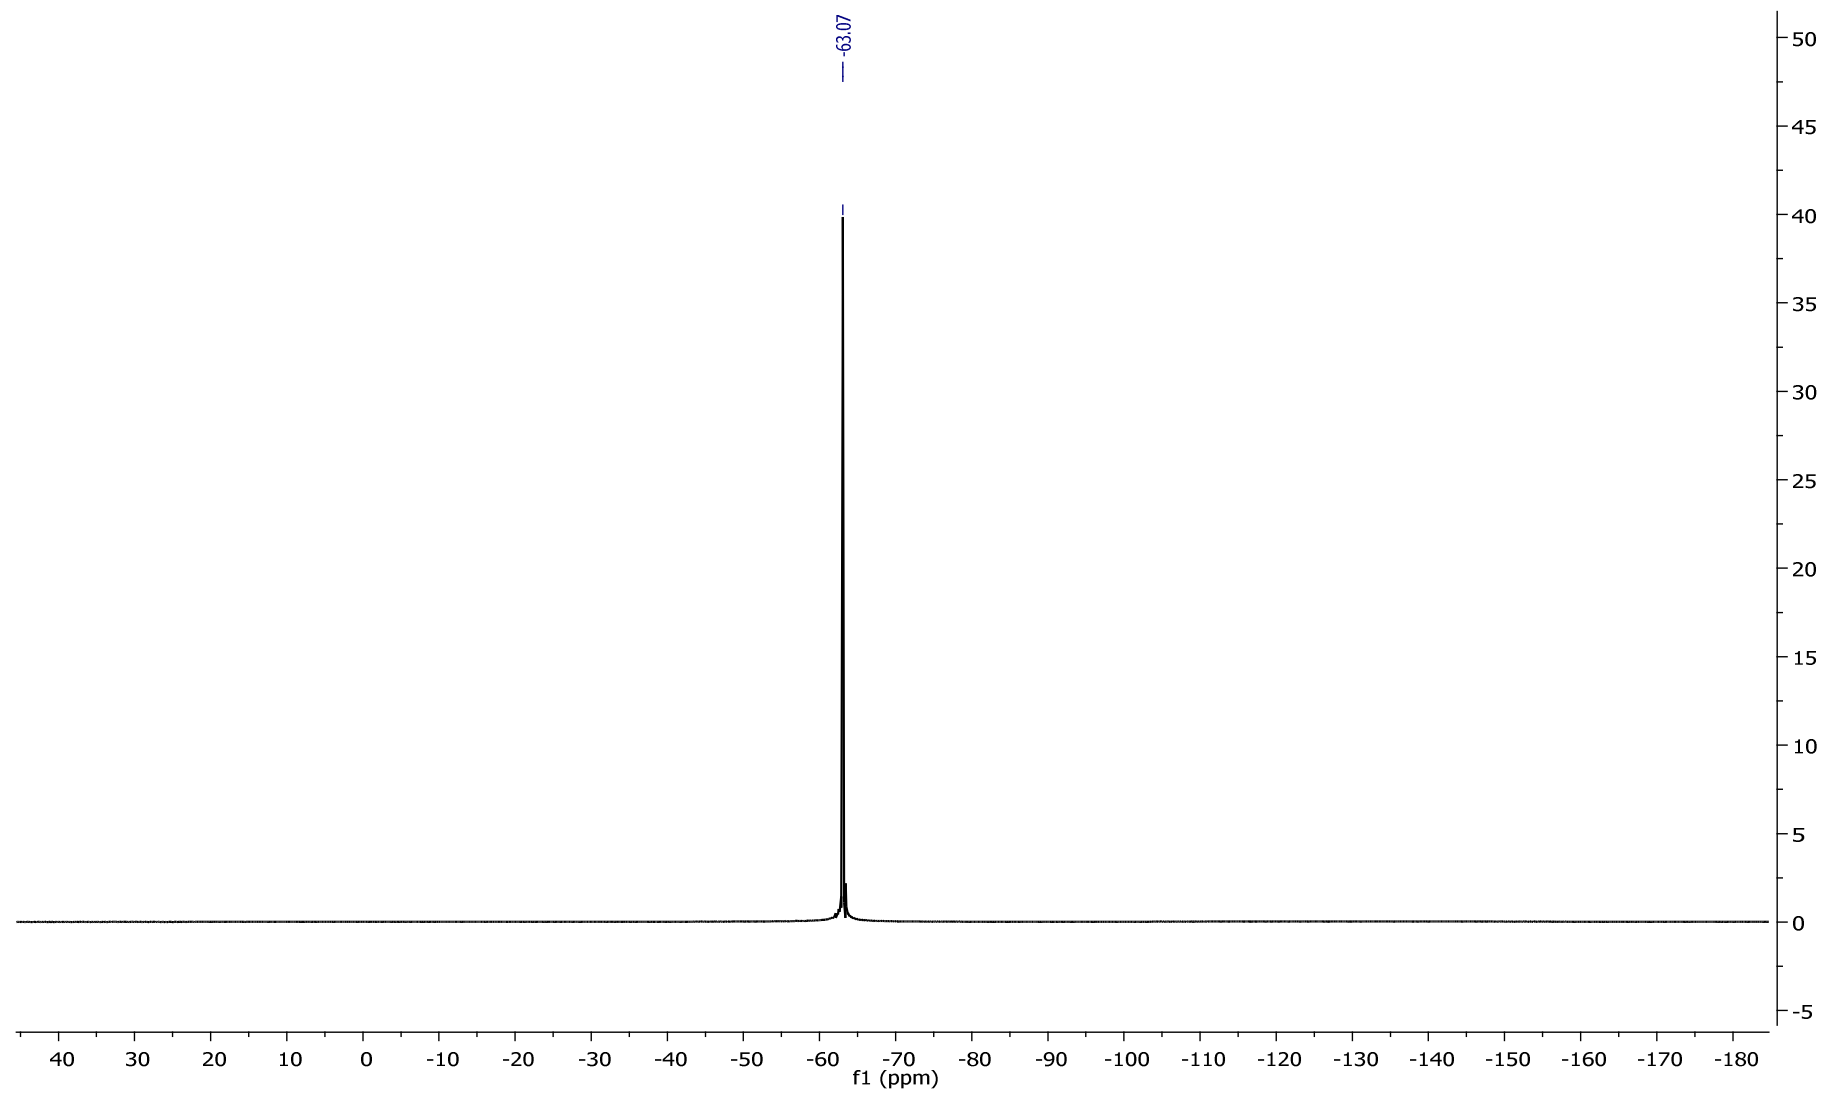



### **General procedure for the preparation of CF<sub>2</sub>-containing quinolinylphosphonates 4a-t**

The mixture of 2-((cyclohexylimino)methyl)aniline derivative **2** (5 mmol) and K<sub>2</sub>CO<sub>3</sub> (5 mmol) was dissolved in dry toluene (25 ml) at ambient temperature. To the reaction mixture an alkyne **3** (5 mmol) was charged slowly. The solution was warmed up to reflux and stirred for 10–12 hours. The K<sub>2</sub>CO<sub>3</sub> was filtered off and the remained solution concentrated under reduced pressure. The crude product was purified by column chromatography on silica gel using DCM:EtOAc (5:1 ratio) as eluent.

1. Diethyl (2-(trifluoromethyl)quinolin-3-yl)phosphonate **4a**

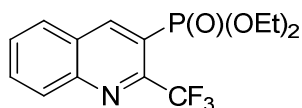

Yellowish oil (97%);  $^1\text{H}$  NMR (400 MHz,  $\text{CDCl}_3$ )  $\delta$  1.30 (t,  $J = 7.1$  Hz, 6H), 4.15 (m, 4H), 7.67 (td,  $J = 8.2$  Hz,  $J = 1.1$  Hz, 1H), 7.85 (td,  $J = 8.2$  Hz,  $J = 1.3$  Hz, 1H), 7.92 (d,  $J = 8.2$  Hz, 1H), 8.15 (dd,  $J = 8.7$  Hz,  $J = 0.7$  Hz, 1H), 9.09 (d,  $^3J_{\text{H-P}} = 16.5$  Hz, 1H);  $^{13}\text{C}$  NMR (100 MHz)  $\delta$  16.1 (d,  $J = 6.5$  Hz), 63.1 (d,  $J = 5.9$  Hz), 119.8 (d,  $^1J_{\text{C-P}} = 186.5$  Hz), 121.4 (q,  $^1J_{\text{C-F}} = 275.7$  Hz), 127.1 (d,  $^3J_{\text{C-P}} = 12.1$  Hz), 128.5, 129.6, 129.8, 132.9, 147.5 (qd,  $^2J_{\text{C-F}} = 35.9$  Hz,  $^2J_{\text{C-P}} = 8.4$  Hz), 147.6 (d,  $^2J_{\text{C-P}} = 6.8$  Hz);  $^{19}\text{F}$  NMR (376 MHz)  $\delta$  -63.8;  $^{31}\text{P}$  NMR (161 MHz)  $\delta$  13.6; HRMS (ESI): calcd for  $\text{C}_{14}\text{H}_{16}\text{F}_3\text{NO}_3\text{P}$   $[\text{M}+\text{H}]^+$  334.0814, found 334.0812.

<sup>1</sup>H NMR

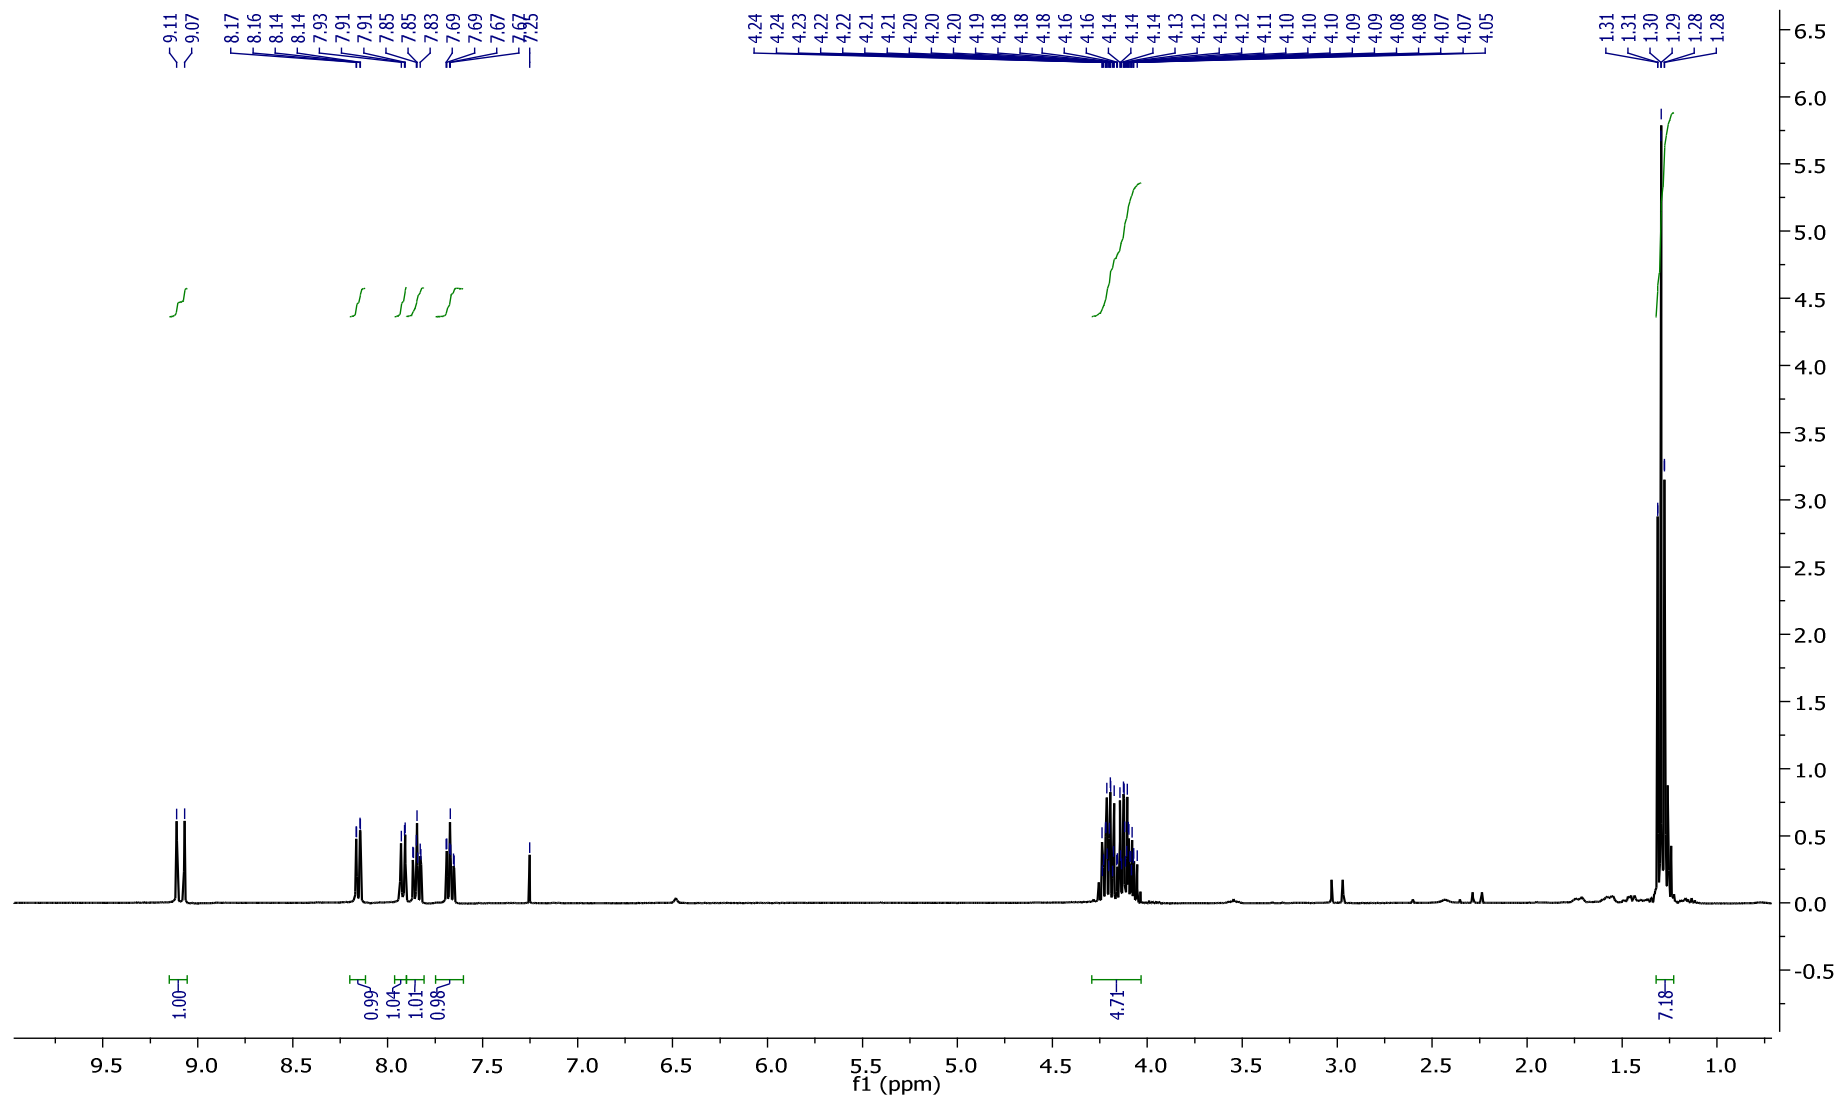

# <sup>13</sup>C NMR

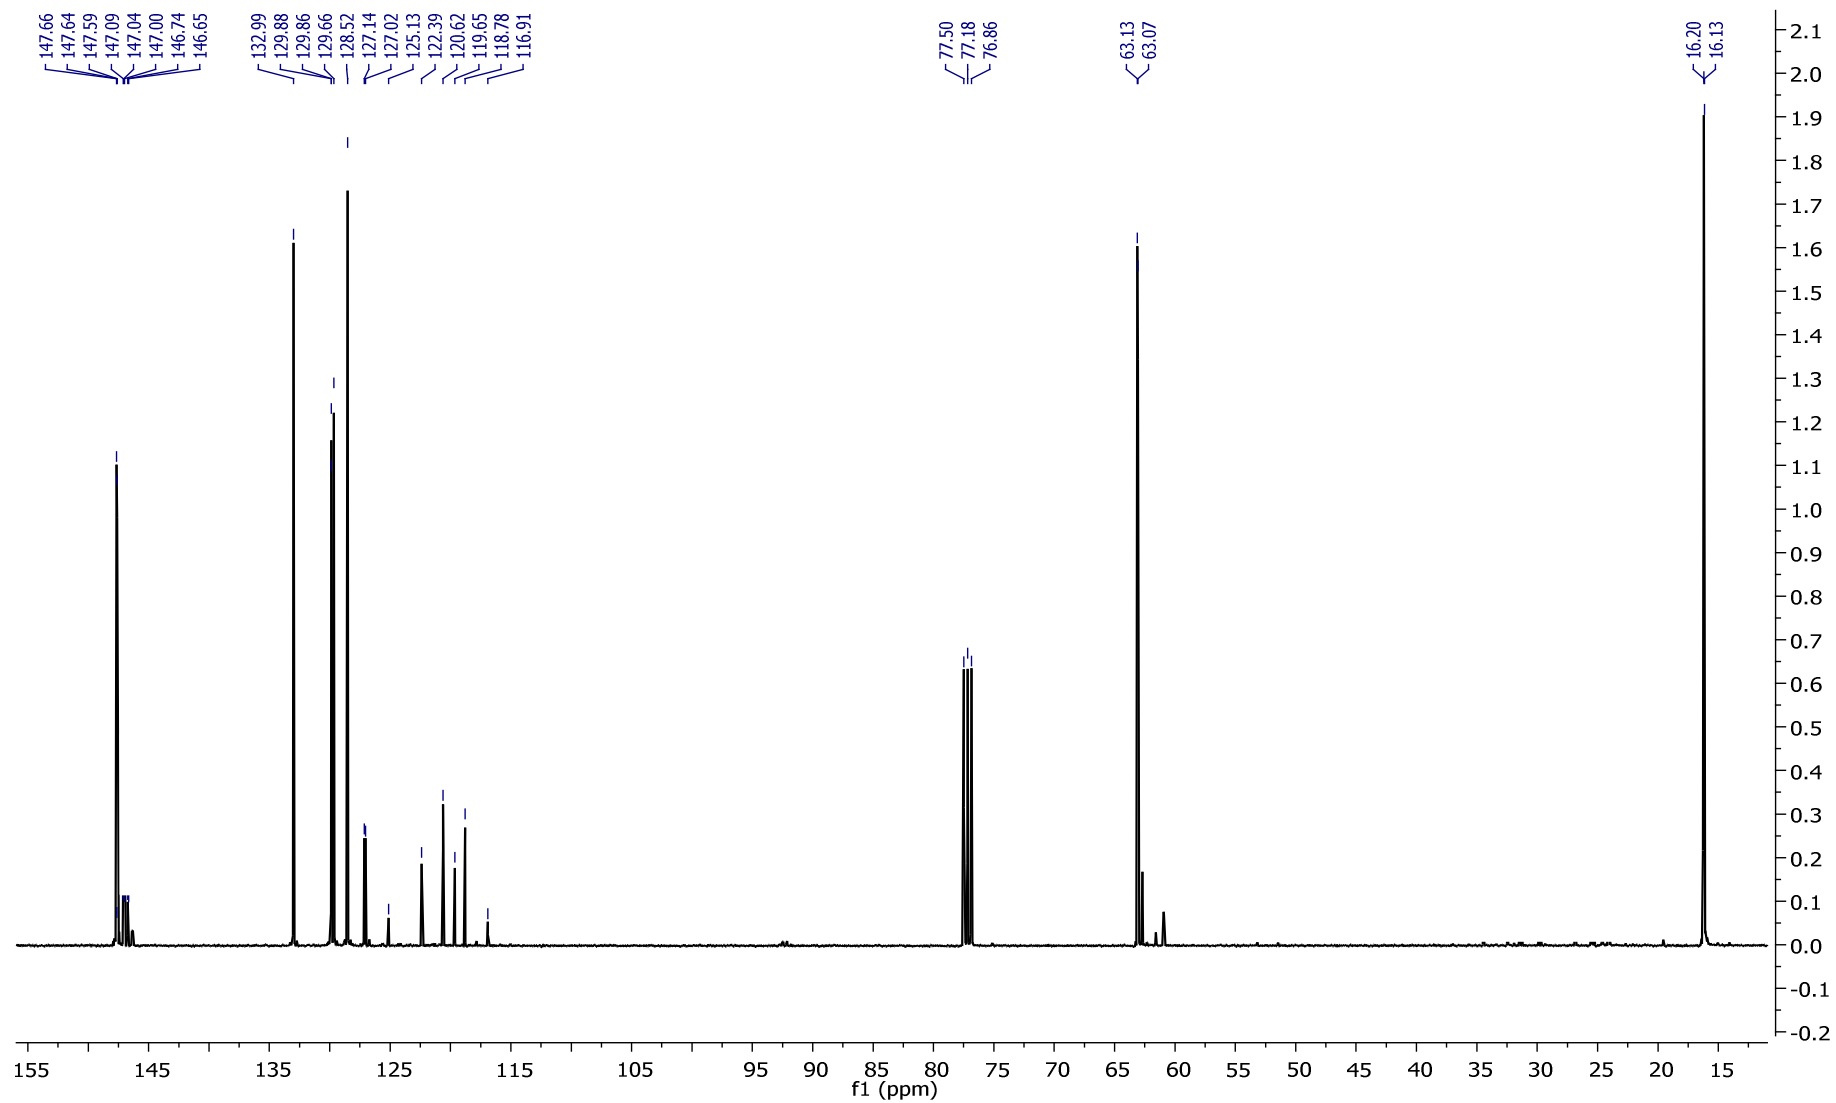

$^{19}\text{F}$  NMR

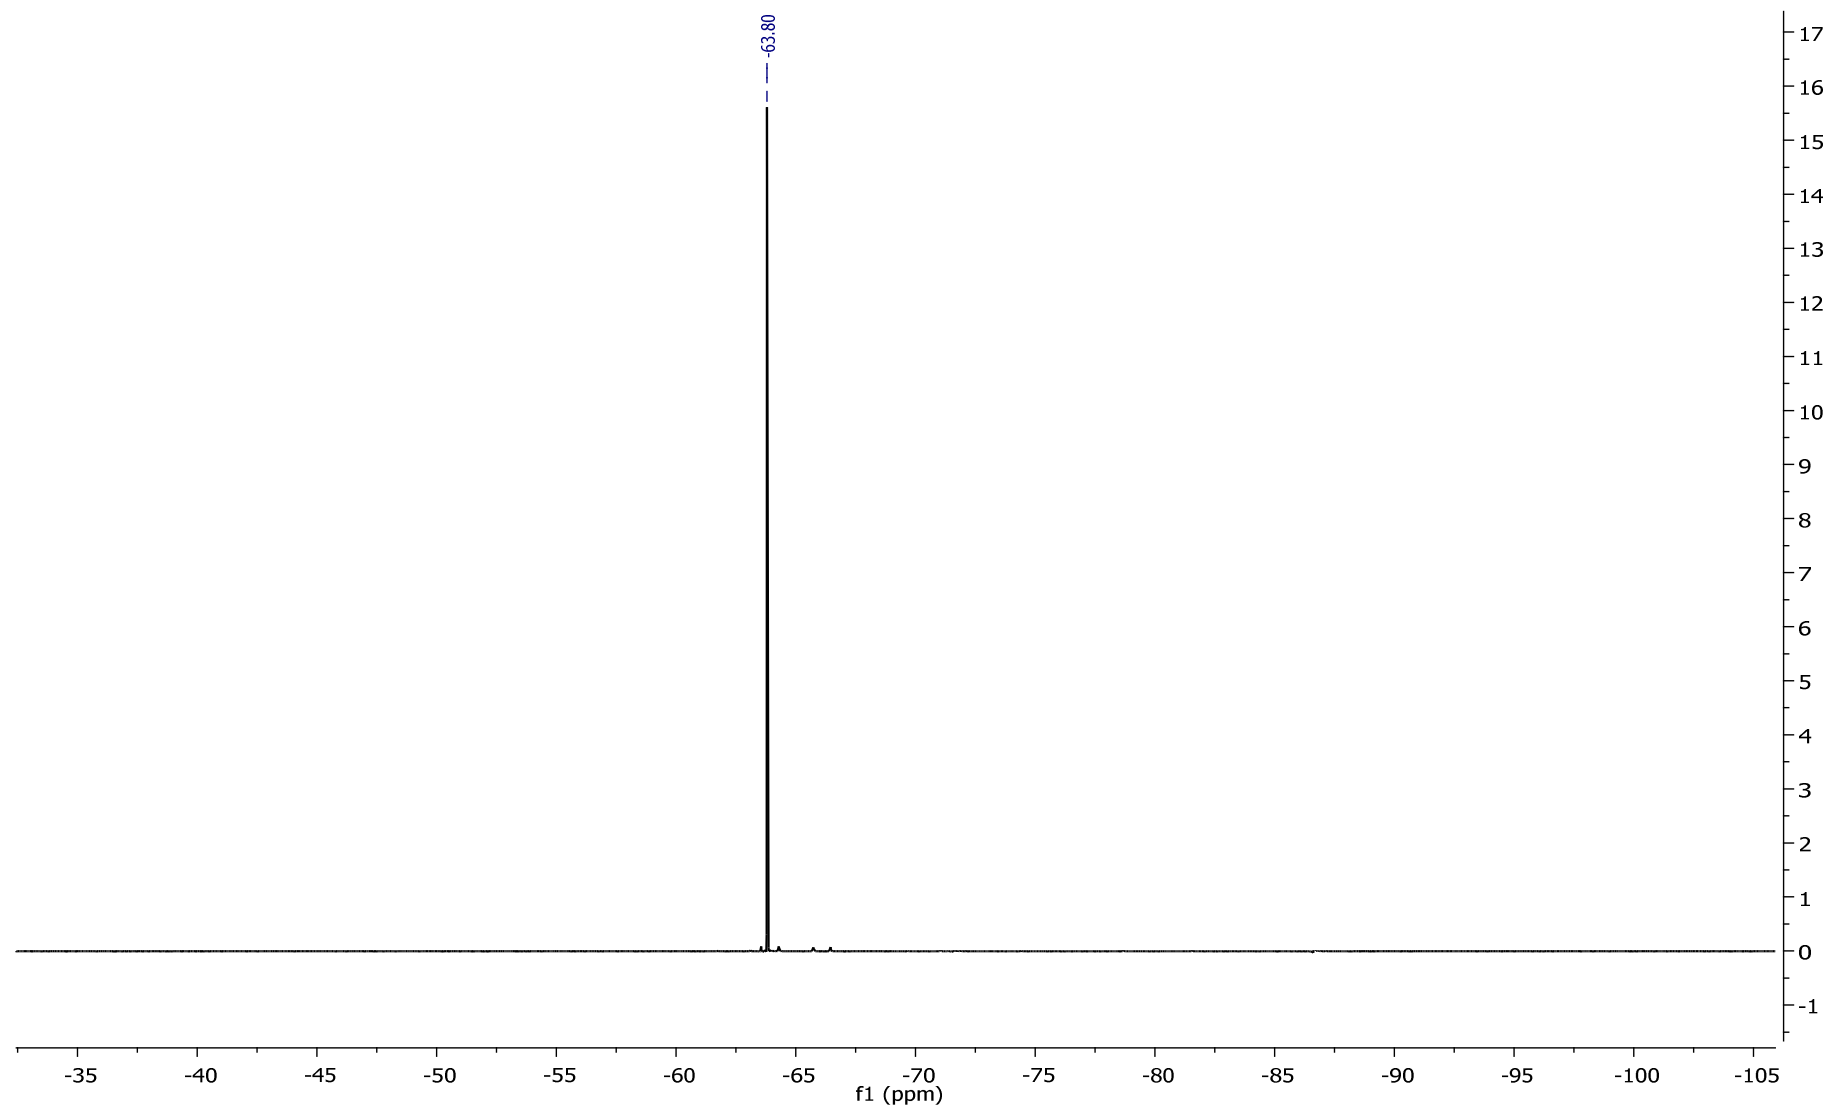

S21

$^{31}\text{P}$  NMR

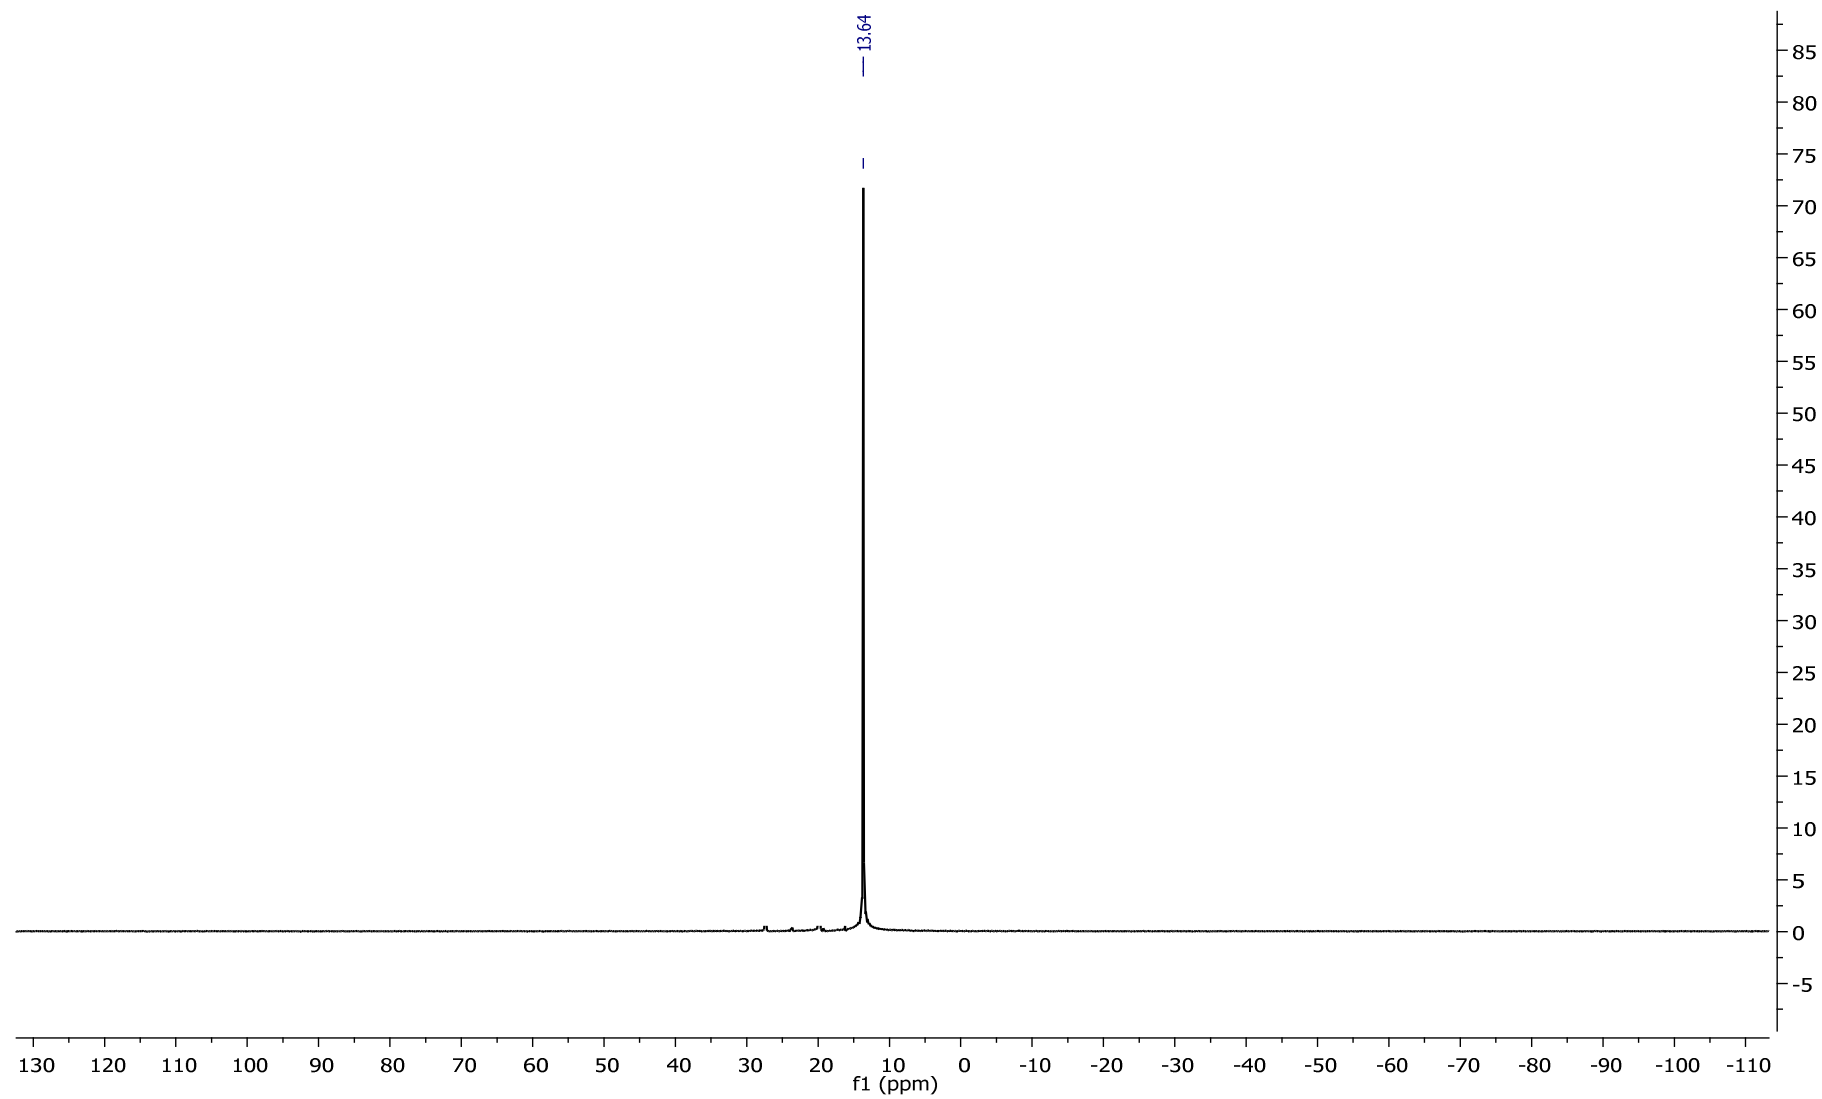

2. Diethyl (6-chloro-2-(trifluoromethyl)quinolin-3-yl)phosphonate **4b**

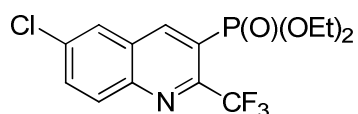

Colourless oil (91%);  $^1\text{H}$  NMR (400 MHz,  $\text{CDCl}_3$ )  $\delta$  1.34 (t,  $J = 6.7$  Hz, 6H), 4.16 (m, 2H), 4.24 (m, 2H), 7.84 (dd,  $J = 8.6$  Hz,  $J = 2.4$  Hz, 1H), 7.95 (d,  $J = 2.7$  Hz, 1H), 8.15 (d,  $J = 8.9$  Hz, 1H), 9.05 (d,  $^3J_{\text{H-P}} = 16.1$  Hz, 1H);  $^{13}\text{C}$  NMR (100 MHz)  $\delta$  16.2 (d,  $J = 6.5$  Hz), 63.3 (d,  $J = 6.2$  Hz), 121.5 (q,  $^1J_{\text{C-F}} = 278.6$  Hz), 121.8 (d,  $^1J_{\text{C-P}} = 183.7$  Hz), 127.1, 127.8 (d,  $^3J_{\text{C-P}} = 11.5$  Hz), 131.5, 133.9, 135.7 (d,  $^4J_{\text{C-P}} = 1.8$  Hz), 145.6, 146.6 (d,  $^2J_{\text{C-P}} = 6.6$  Hz), 147.2 (qd,  $^2J_{\text{C-F}} = 36.2$  Hz,  $^2J_{\text{C-P}} = 7.8$  Hz);  $^{19}\text{F}$  NMR (376 MHz)  $\delta$  -63.8;  $^{31}\text{P}$  NMR (161 MHz)  $\delta$  12.9; HRMS (ESI): calcd for  $\text{C}_{14}\text{H}_{14}\text{ClF}_3\text{NNaO}_3\text{P}$   $[\text{M}+\text{Na}]^+$  390.0244, found 390.0245.

<sup>1</sup>H NMR

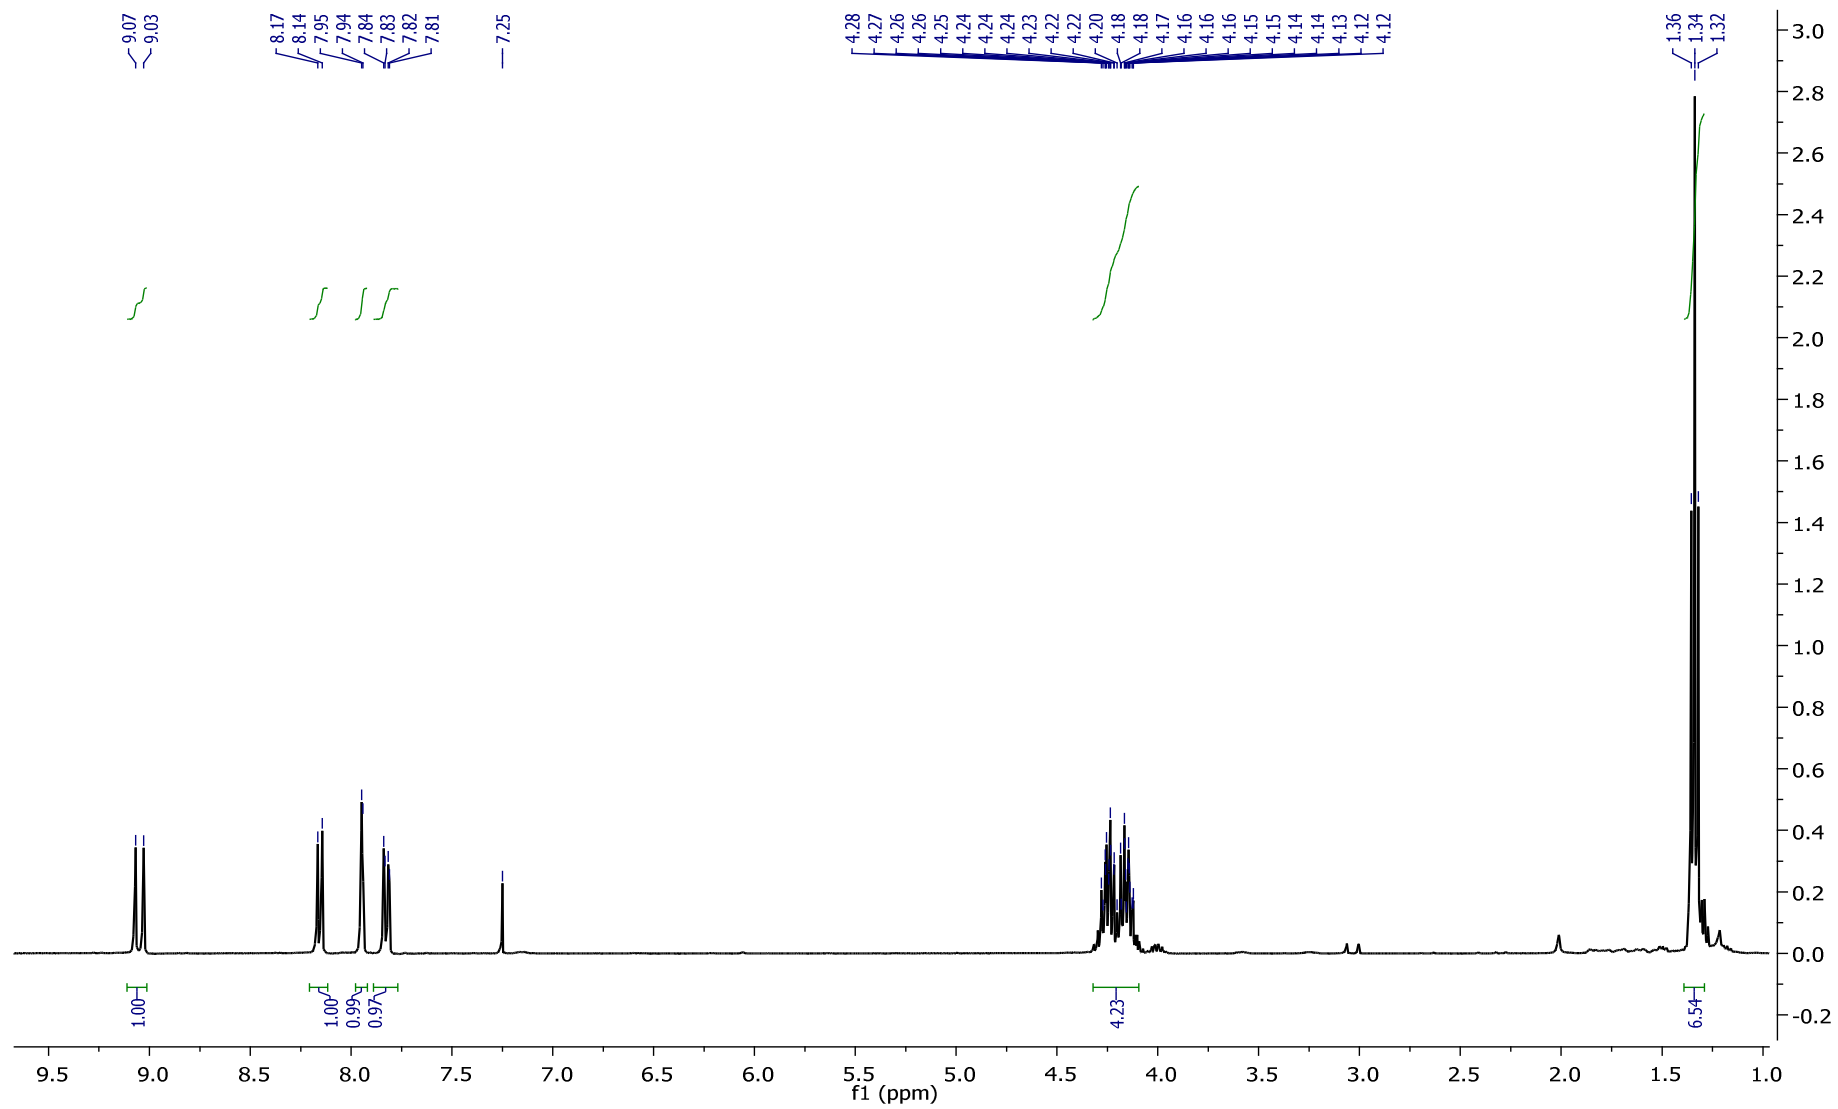



$^{13}\text{C}$  NMR

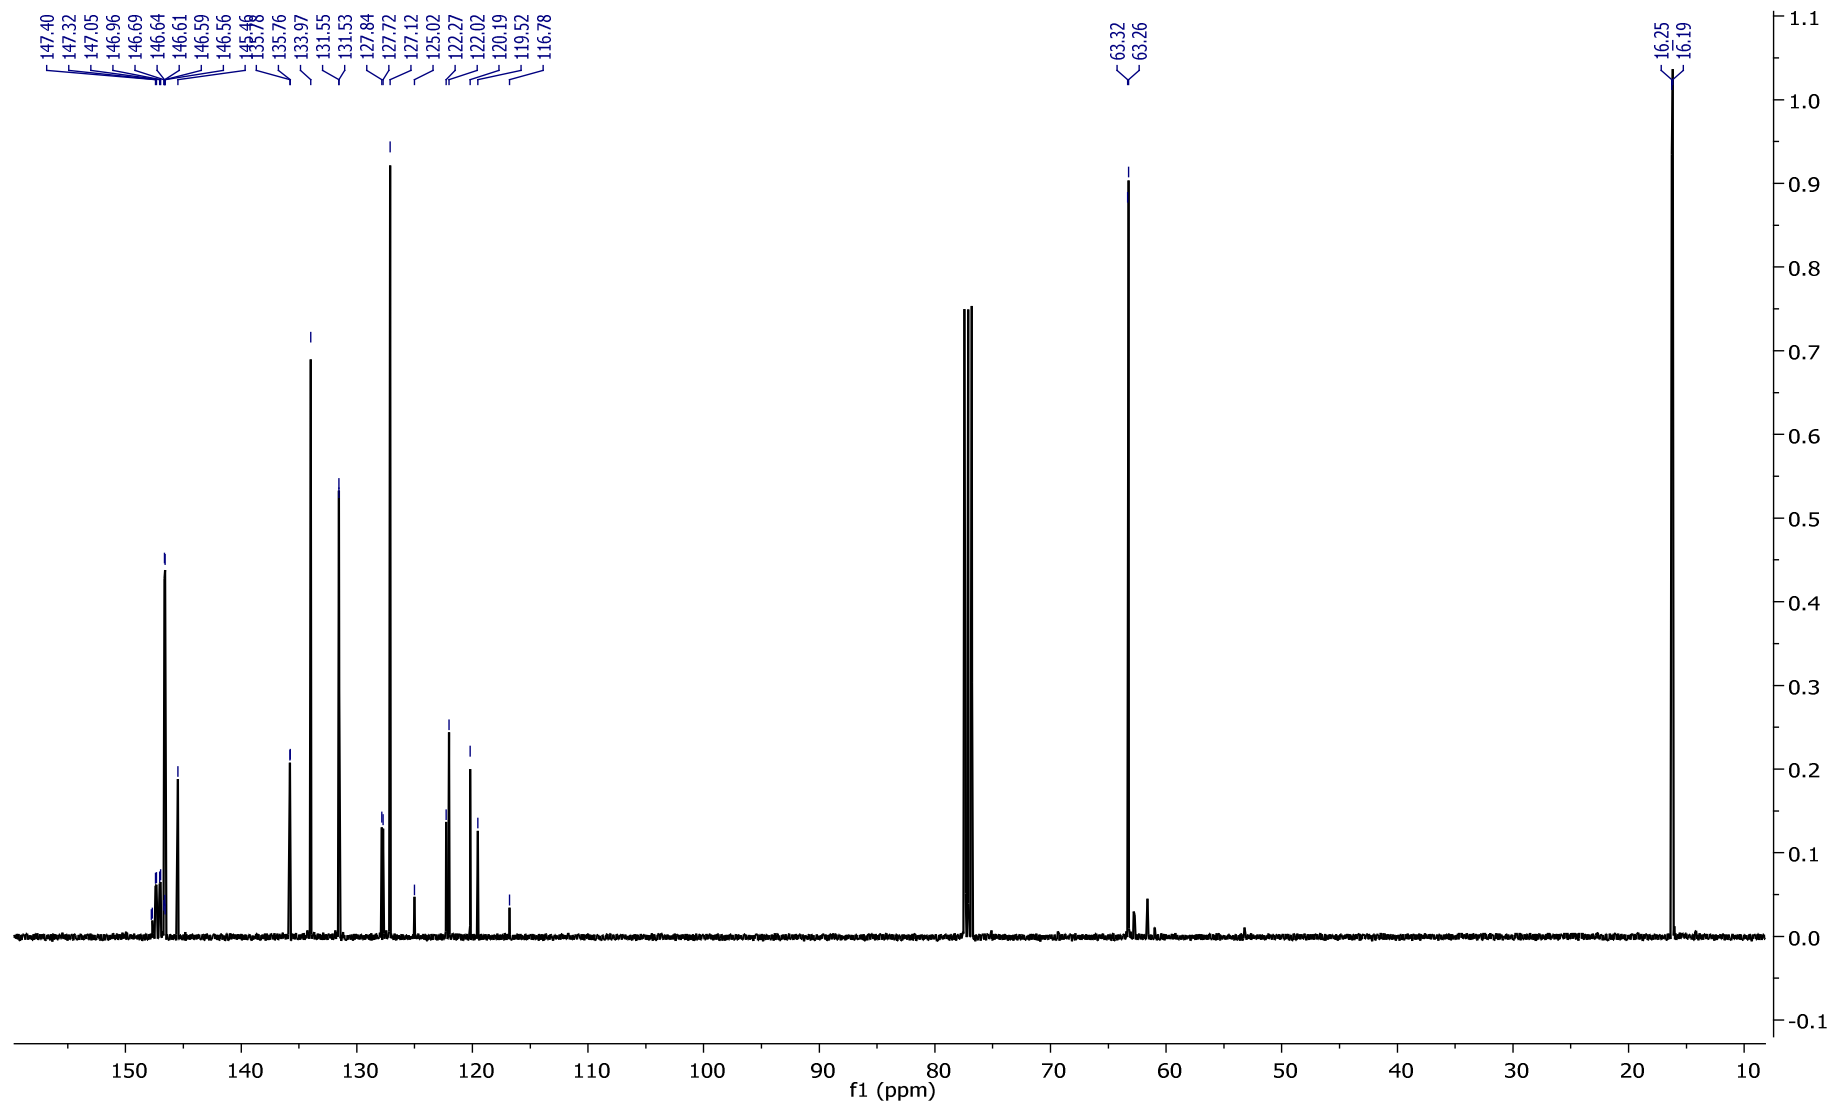

$^{19}\text{F}$  NMR

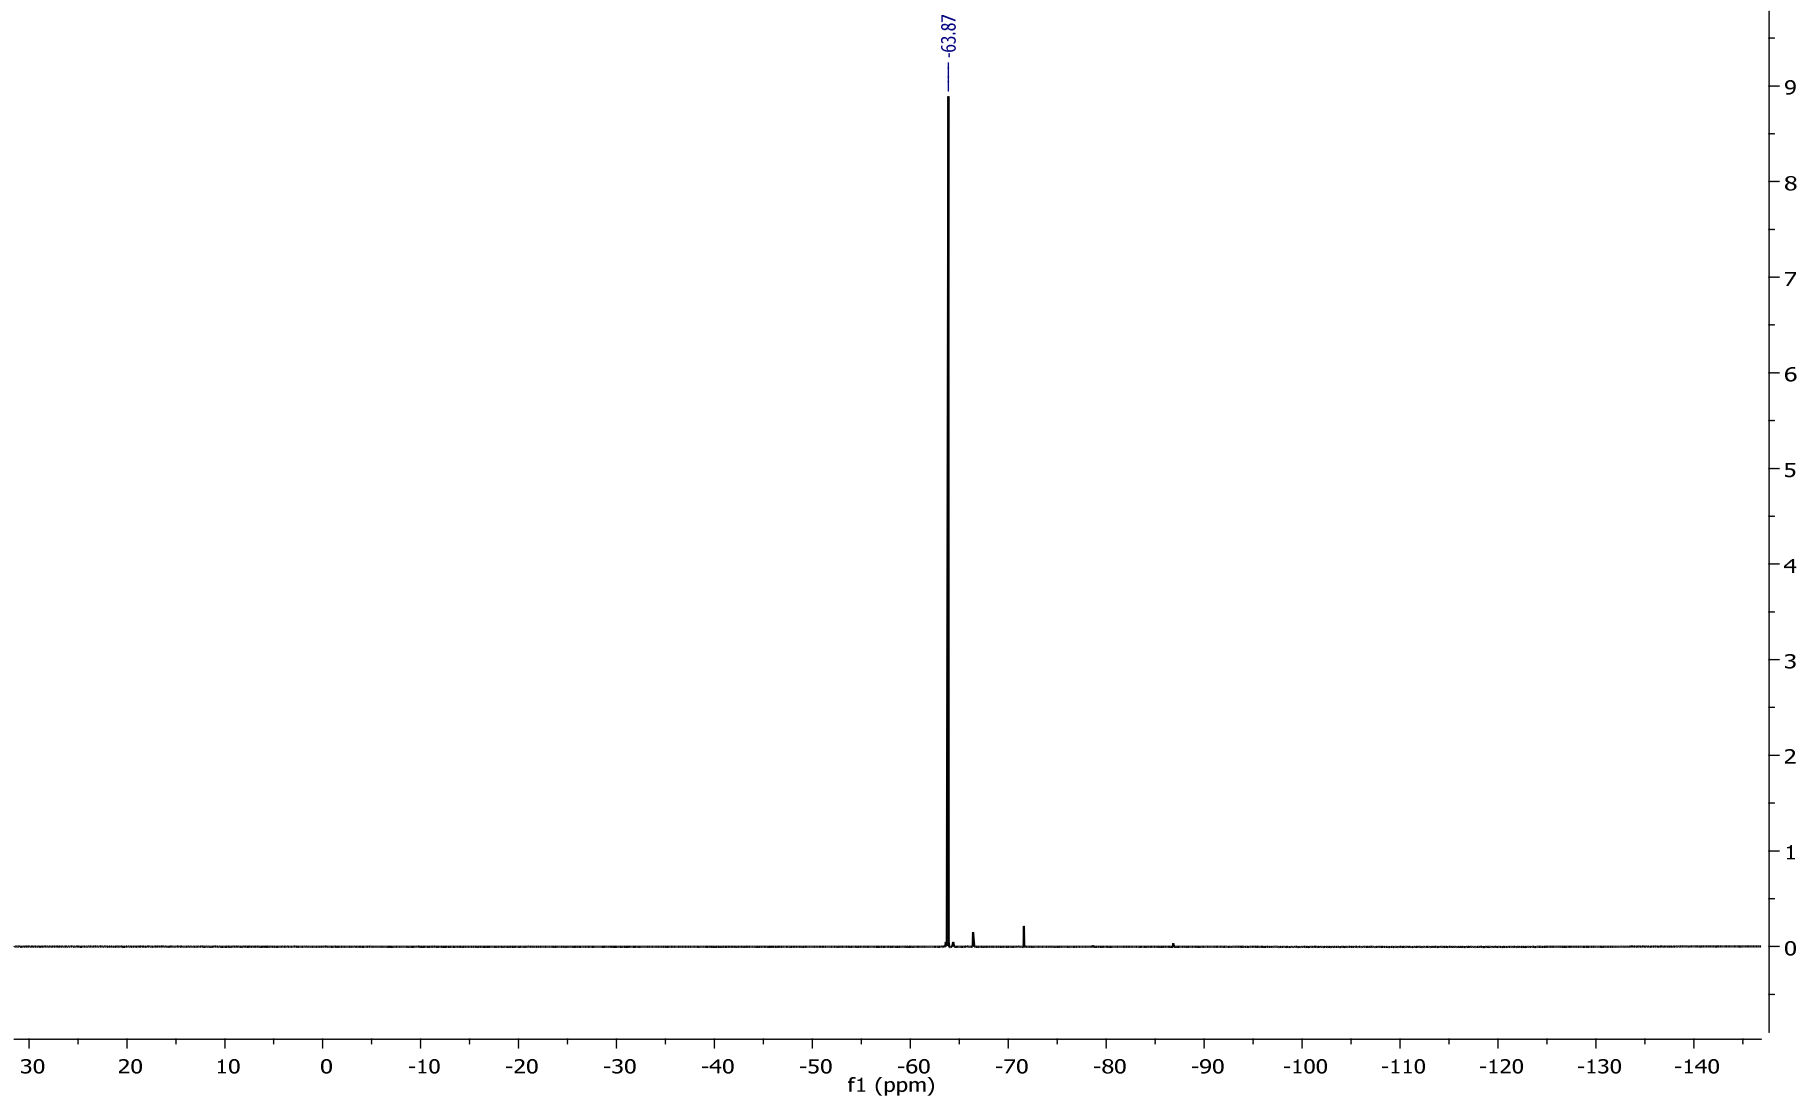

$^{31}\text{P}$  NMR

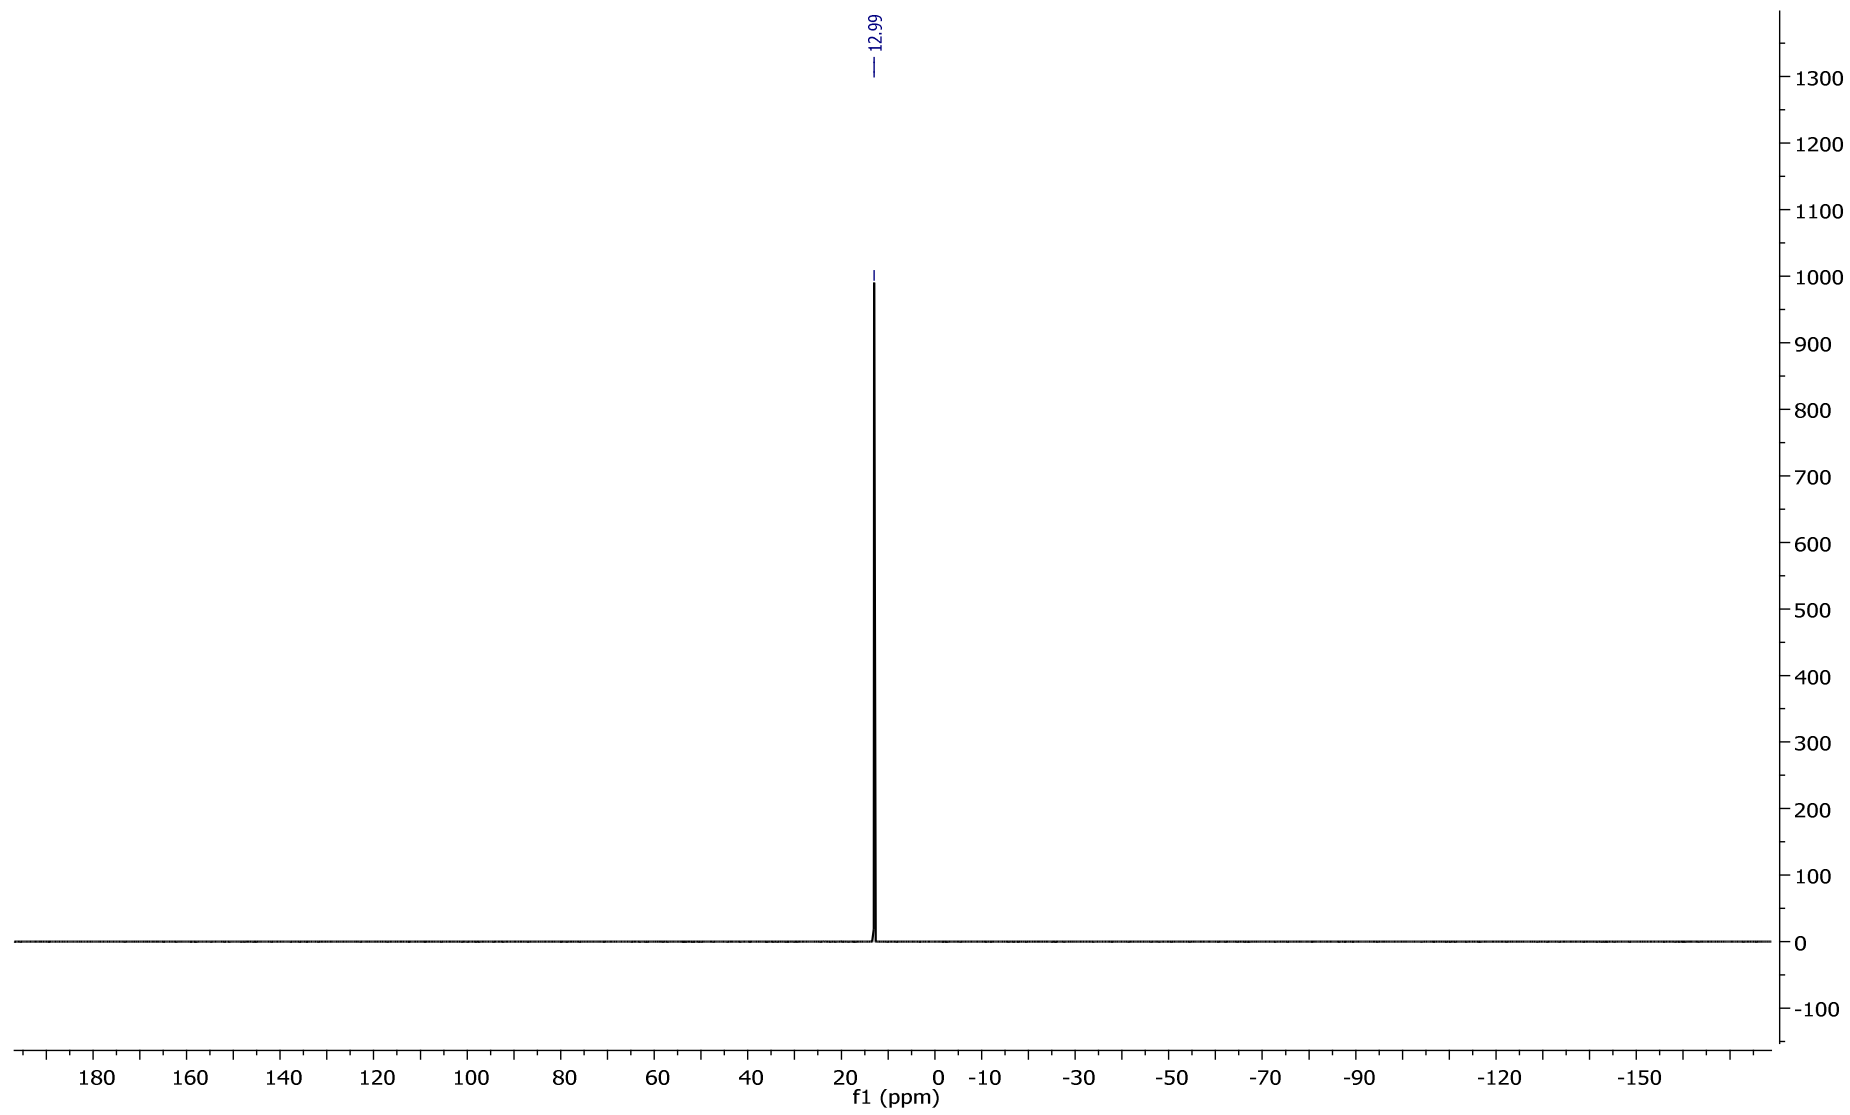

3. Diethyl (6,7-dimethoxy-2-(trifluoromethyl)quinolin-3-yl)phosphonate **4c**

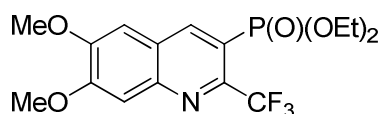

Yellowish crystals (80%); Mp = 186–190 °C;  $^1\text{H}$  NMR (400 MHz,  $\text{CDCl}_3$ )  $\delta$  1.33 (t,  $J = 7.2$  Hz, 6H), 4.02 (s, 3H), 4.05 (s, 3H), 4.13 (m, 2H), 4.23 (m, 2H), 7.16 (s, 1H), 7.51 (s, 1H), 8.93 (d,  $^3J_{\text{H-P}} = 16.2$  Hz, 1H);  $^{13}\text{C}$  NMR (100 MHz)  $\delta$  16.2 (d,  $J = 6.4$  Hz), 56.4, 56.6, 62.9 (d,  $J = 6.1$  Hz), 105.3, 108.2, 117.4 (d,  $^1J_{\text{C-P}} = 186.7$  Hz), 117.4 (q,  $^1J_{\text{C-F}} = 275.8$  Hz), 123.5 (d,  $^3J_{\text{C-P}} = 11.1$  Hz), 144.8 (d,  $^2J_{\text{C-P}} = 7.4$  Hz), 145.1 (qd,  $^2J_{\text{C-F}} = 35.4$  Hz,  $^2J_{\text{C-P}} = 8.7$  Hz), 152.2, 155.4;  $^{19}\text{F}$  NMR (376 MHz)  $\delta$  -63.3;  $^{31}\text{P}$  NMR (161 MHz)  $\delta$  14.7 Hz; HRMS (ESI): calcd for  $\text{C}_{16}\text{H}_{19}\text{F}_3\text{NNaO}_5\text{P}$   $[\text{M}+\text{Na}]^+$  416.0845, found 416.0858.

$^1\text{H}$  NMR

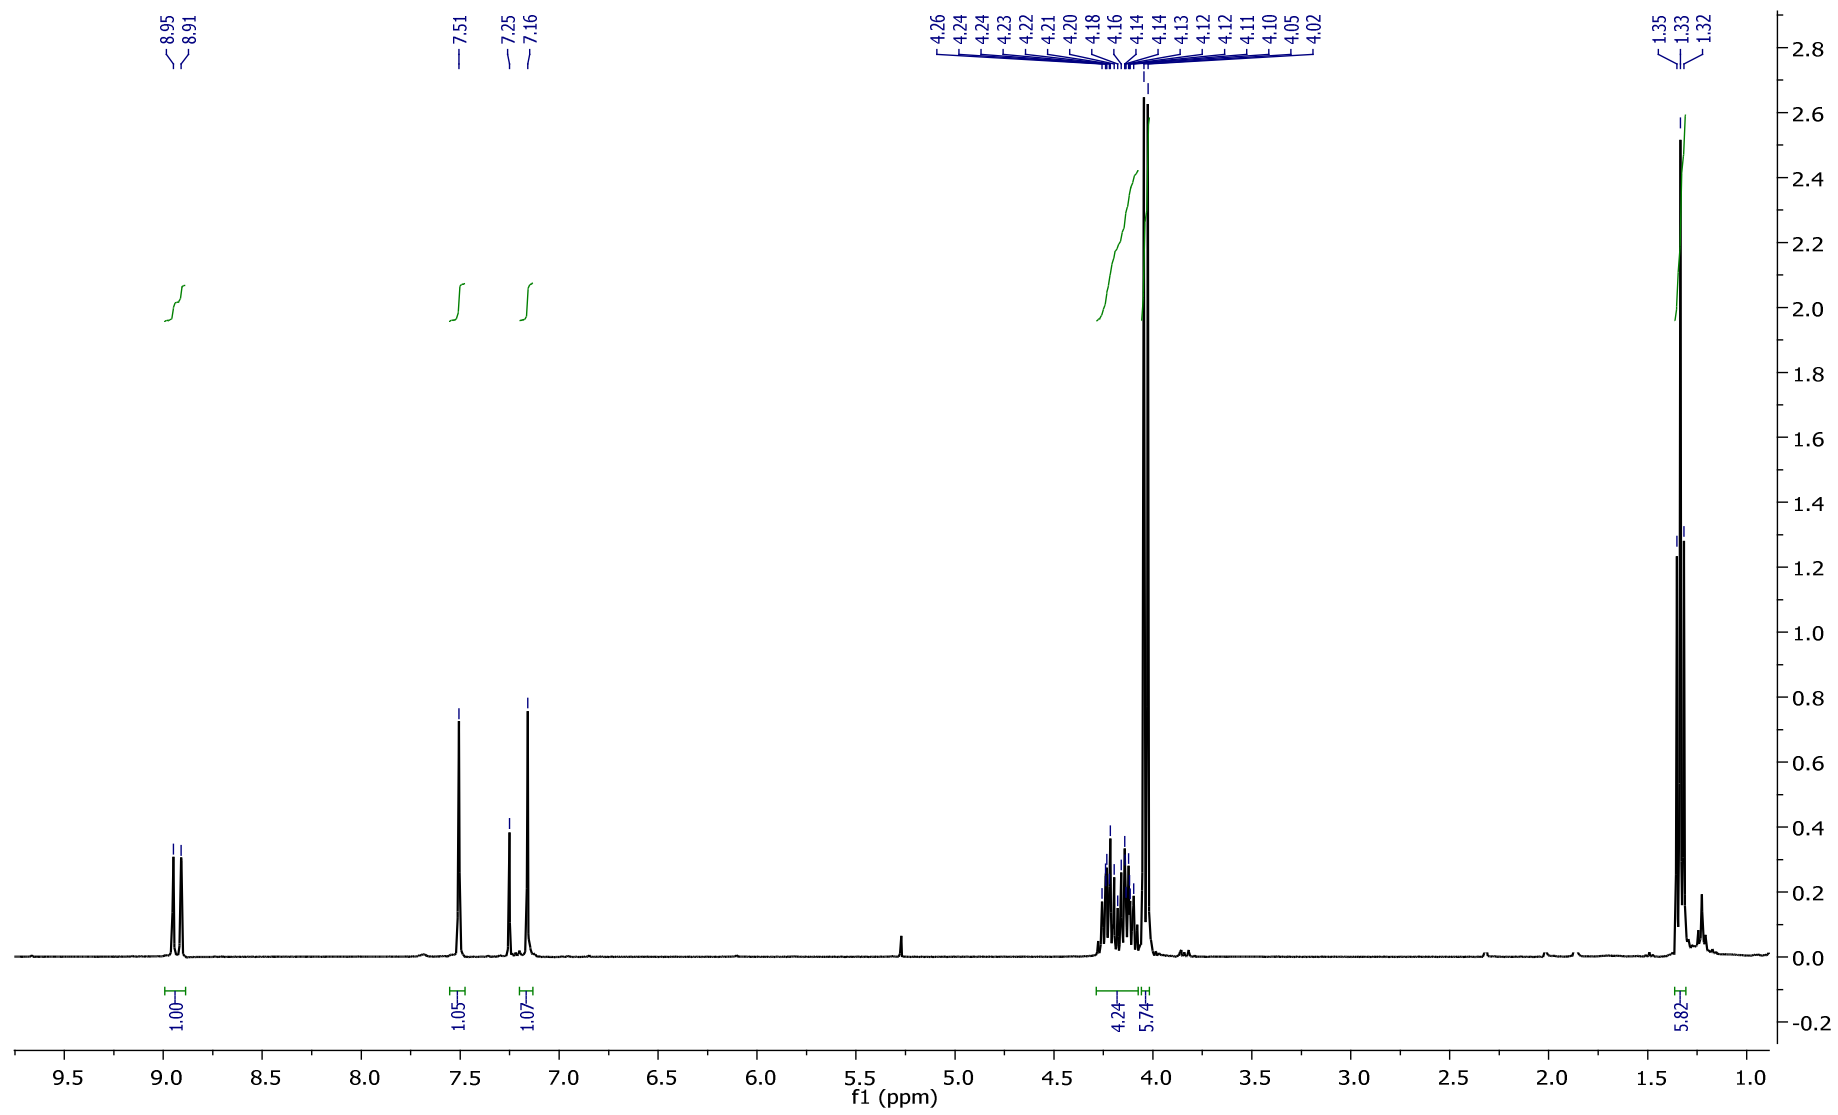

$^{13}\text{C}$  NMR

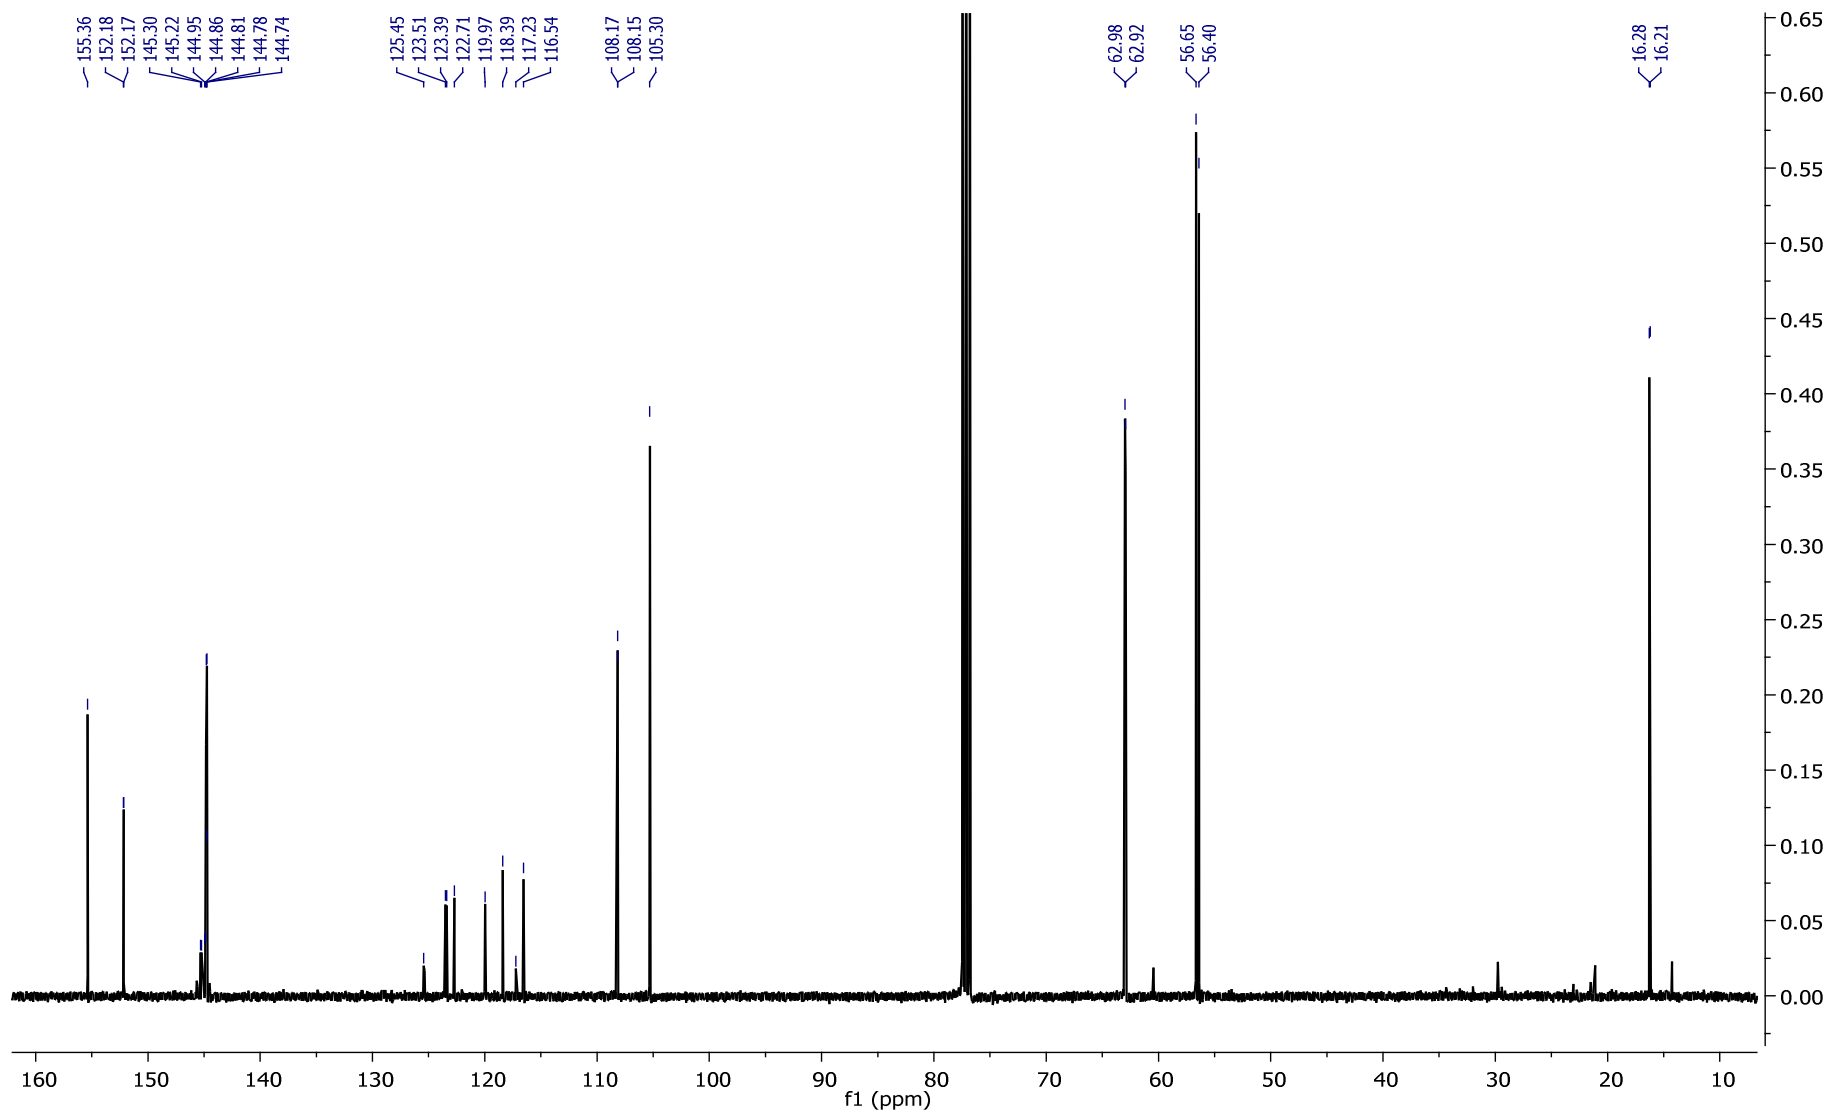

$^{19}\text{F}$  NMR

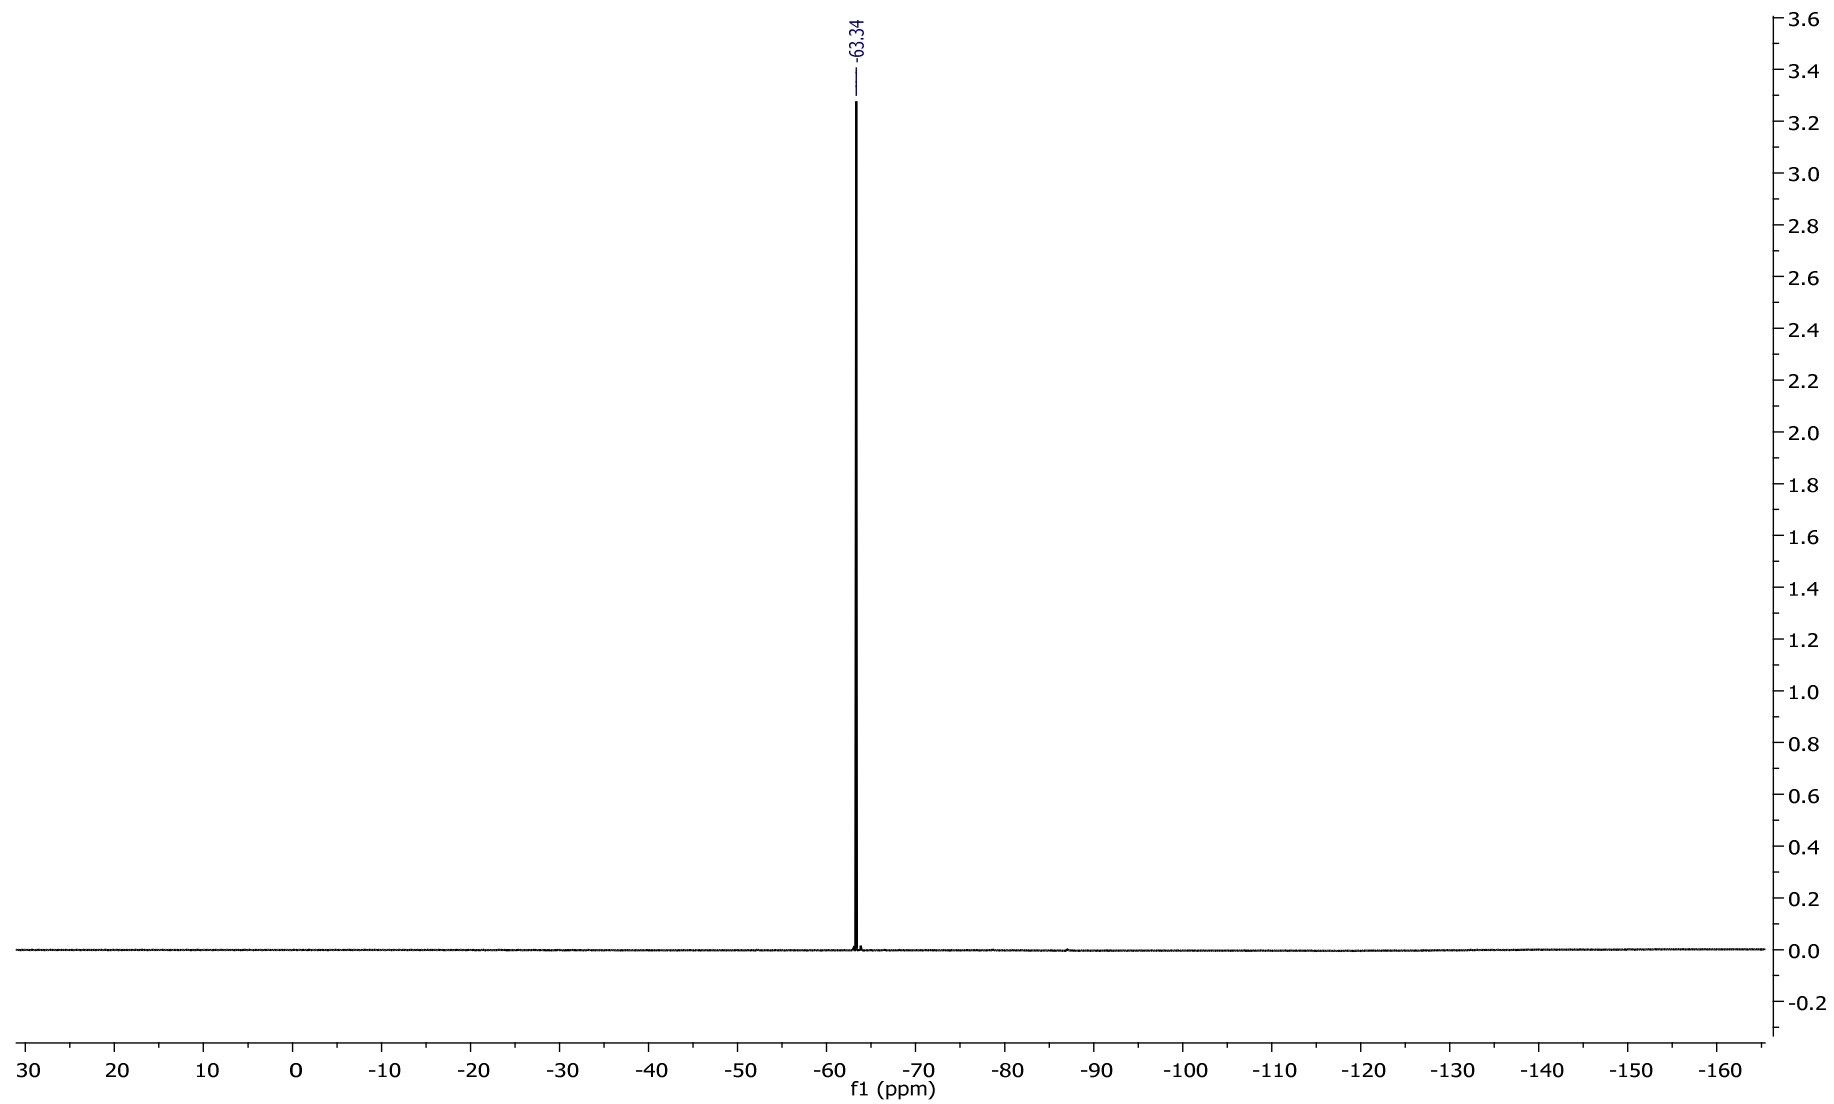

$^{31}\text{P}$  NMR

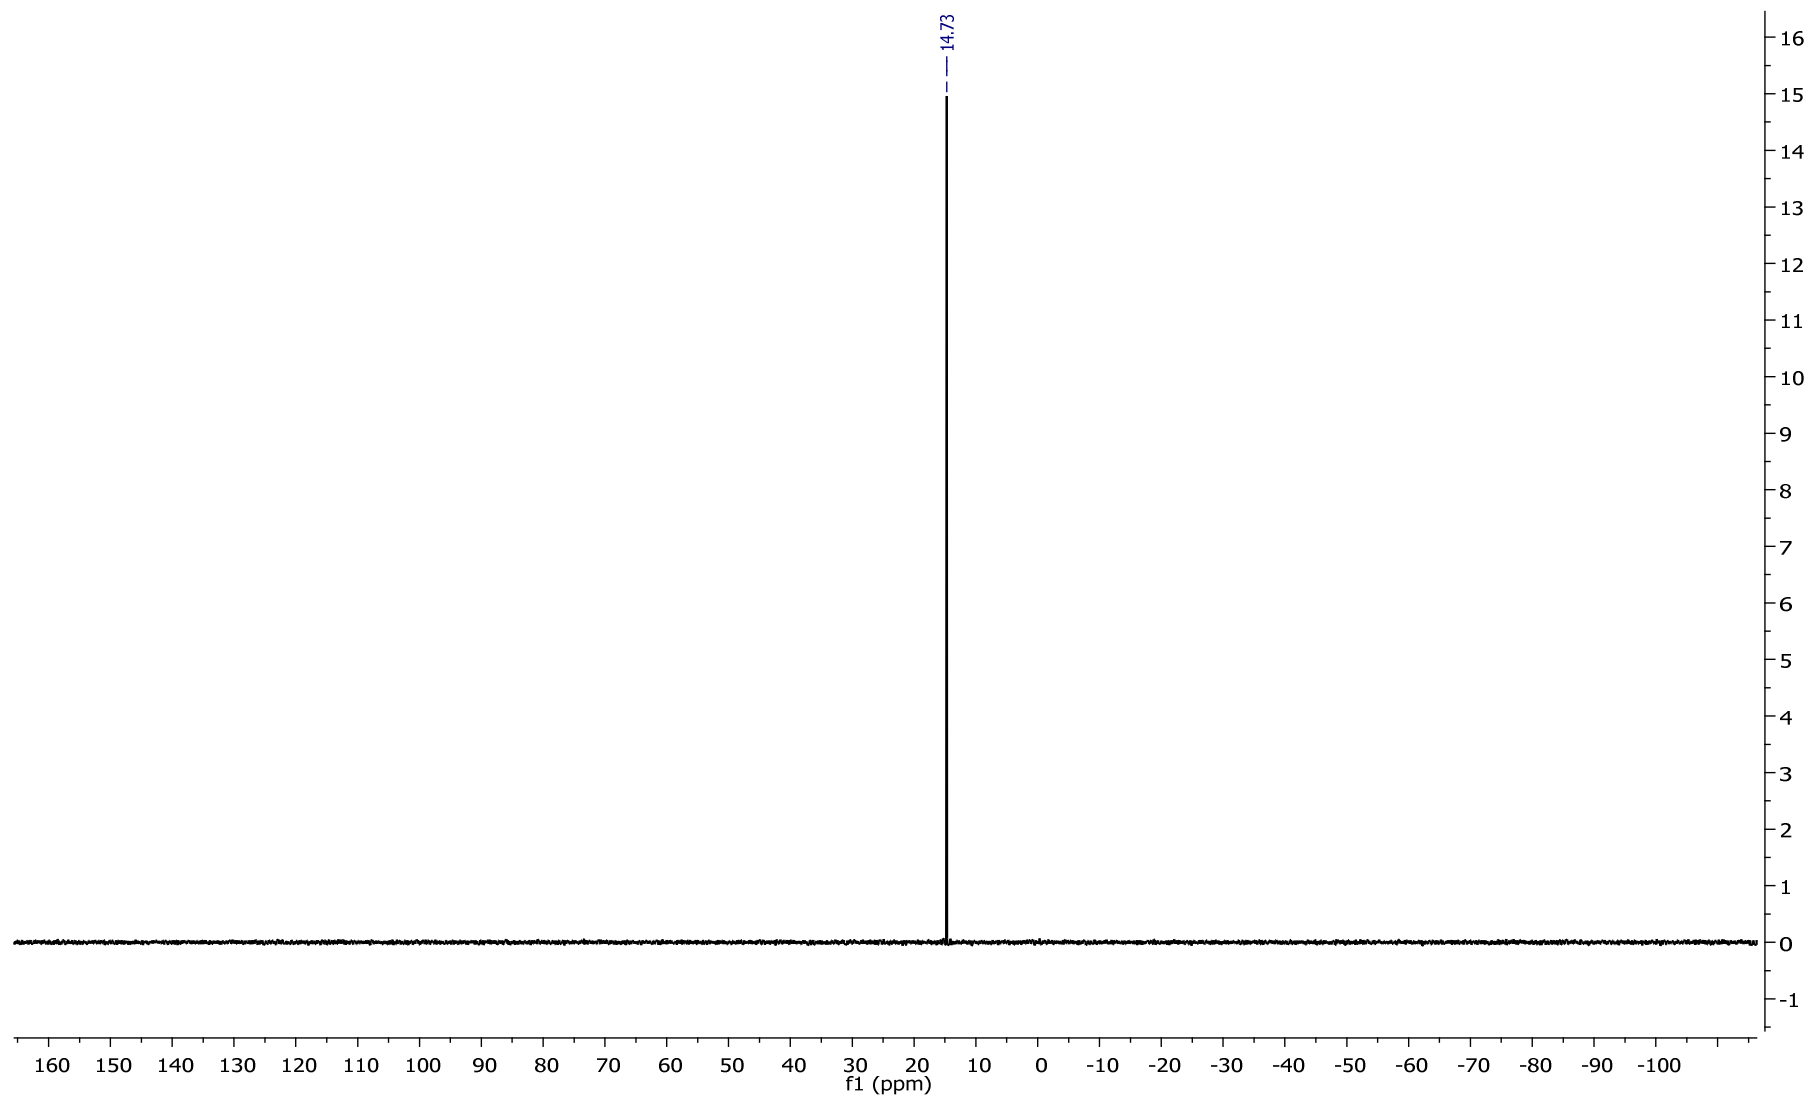



### **X-Ray crystallography:**

A block-shaped single crystal of **3j** with dimensions 0.18 mm x 0.18 mm x 0.45 mm was mounted on a Hampton cryo-loop for indexing and intensity data collection at 100° K on a Bruker APEX II CCD using Mo-K $\alpha$  radiation ( $\lambda = 0.71073 \text{ \AA}$ ). Lorentz and polarization corrections were applied, and an absorption correction was performed using the SADABS program. [G. M. Sheldrick, SADABS, Program for empirical X-ray absorption correction, Bruker-Nonius, **1990**]

Direct methods were used for structure solution of all structures (SHELXS-97). Structural refinement was obtained from successive Fourier maps (SHELXL-97). [G. M. Sheldrick, *Acta Crystallogr.* **2007**, A64, 112-122.] All heavy atoms (C, N, O, Br, P, F) were refined anisotropically whereas the hydrogen atoms were found through calculated constrained positions. The crystallographic data for are summarized in Table S1.

**Table S1.** Crystal data for **4c**.

|                                              |                                                                  |
|----------------------------------------------|------------------------------------------------------------------|
| Empirical formula                            | C <sub>16</sub> H <sub>19</sub> F <sub>3</sub> NO <sub>5</sub> P |
| Formula weight, g/mol                        | 393.29                                                           |
| Crystal system                               | Triclinic                                                        |
| Space group                                  | <i>P</i> -1                                                      |
| <i>a</i> , Å                                 | 7.4669(6)                                                        |
| <i>b</i> , Å                                 | 9.0018(6)                                                        |
| <i>c</i> , Å                                 | 12.9910(11)                                                      |
| $\alpha$ , °                                 | 93.708(5)                                                        |
| $\beta$ , °                                  | 95.044(6)                                                        |
| $\gamma$ , °                                 | 93.142(5)                                                        |
| Volume, Å <sup>3</sup>                       | 866.39(12)                                                       |
| <i>Z</i>                                     | 2                                                                |
| <i>D</i> <sub>calc</sub> , g/cm <sup>3</sup> | 1.508                                                            |
| Absorption coefficient                       | 0.218                                                            |
| F(000)                                       | 408                                                              |
| Crystal size, mm                             | 0.05 x 0.20 x 0.40                                               |
| Theta range for data collection, °           | 2.74 – 24.30                                                     |
| Reflections collected                        | 39542                                                            |

|                                  |        |
|----------------------------------|--------|
| Independent reflections          | 3497   |
| R(int)                           | 0.094  |
| Observed ( $I > 2\sigma(I)$ )    | 2478   |
| Goodness-of-fit on F2            | 1.024  |
| $R_1[I > 2\sigma(I)]^{[a]}$      | 0.0426 |
| $wR_2$ (all data) <sup>[b]</sup> | 0.1118 |

[a]  $R = \Sigma||F_o| - |F_c||/\Sigma|F_o|$ . [b]  $wR = [\Sigma w(F_o^2 - F_c^2)^2/\Sigma w(F_o^2)^2]^{1/2}$ .

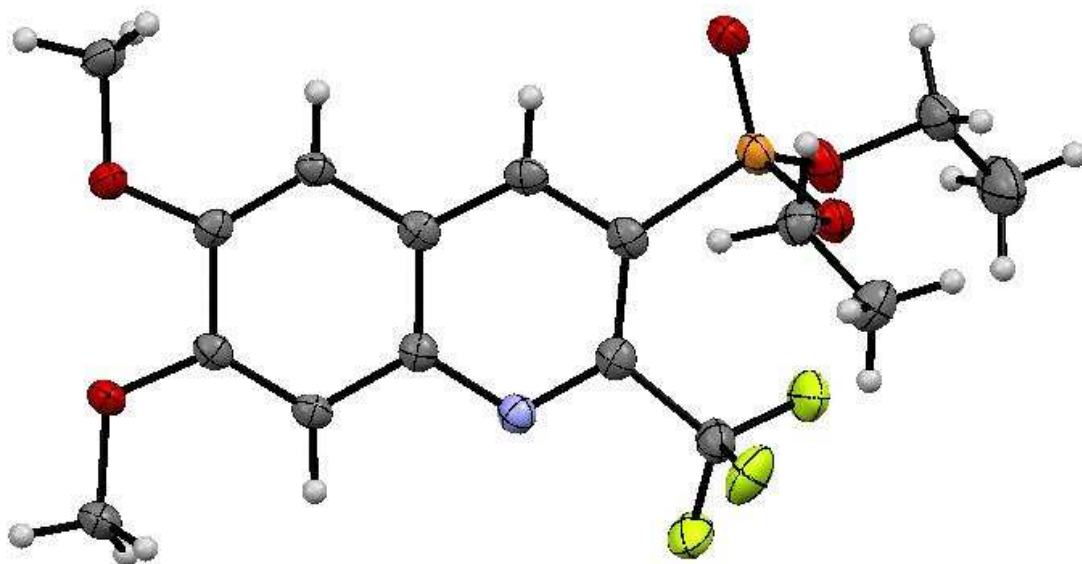

4. Diethyl (2,7-bis(trifluoromethyl)quinolin-3-yl)phosphonate **4d**

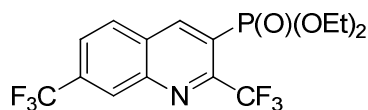

Yellowish oil (99%);  $^1\text{H}$  NMR (400 MHz,  $\text{CDCl}_3$ )  $\delta$  1.36 (t,  $J = 6.9$  Hz, 6H), 4.18 (m, 2H), 4.28 (m, 2H), 7.91 (d,  $J = 8.6$  Hz, 1H), 8.13 (d,  $J = 8.6$  Hz, 1H), 8.56 (s, 1H), 9.24 (d,  $^3J_{\text{H-P}} = 16.5$  Hz, 1H);  $^{13}\text{C}$  NMR (100 MHz)  $\delta$  16.2 (d,  $J = 6.4$  Hz), 63.4 (d,  $J = 6.1$  Hz), 120.8 (q,  $^1J_{\text{C-F}} = 276.5$  Hz), 122.2 (d,  $^1J_{\text{C-P}} = 185.5$  Hz), 123.2 (q,  $^1J_{\text{C-F}} = 270.8$  Hz), 125.8 (qd,  $^4J_{\text{C-F}} = 3.2$  Hz,  $^4J_{\text{C-P}} = 1.2$  Hz), 127.8 (qd,  $^4J_{\text{C-F}} = 4.2$  Hz,  $^4J_{\text{C-P}} = 1.3$  Hz), 128.5 (dq,  $^3J_{\text{C-P}} = 11.9$  Hz,  $^5J_{\text{C-F}} = 1.1$  Hz), 129.8, 134.5 (q,  $^2J_{\text{C-F}} = 33.6$  Hz), 146.2, 147.7 (d,  $^2J_{\text{C-P}} = 6.8$  Hz), 148.6 (qd,  $^2J_{\text{C-F}} = 35.8$  Hz,  $^2J_{\text{C-P}} = 8.9$  Hz);  $^{19}\text{F}$  NMR (376 MHz)  $\delta$  -63.0 (s,  $-\text{CF}_3$ ), -64.0 (s,  $-\text{CF}_3$ );  $^{31}\text{P}$  NMR (161 MHz)  $\delta$  12.5; HRMS (ESI): calcd for  $\text{C}_{15}\text{H}_{14}\text{F}_6\text{NNaO}_3\text{P}$   $[\text{M}+\text{Na}]^+$  424.0508, found 424.0508.

<sup>1</sup>H NMR

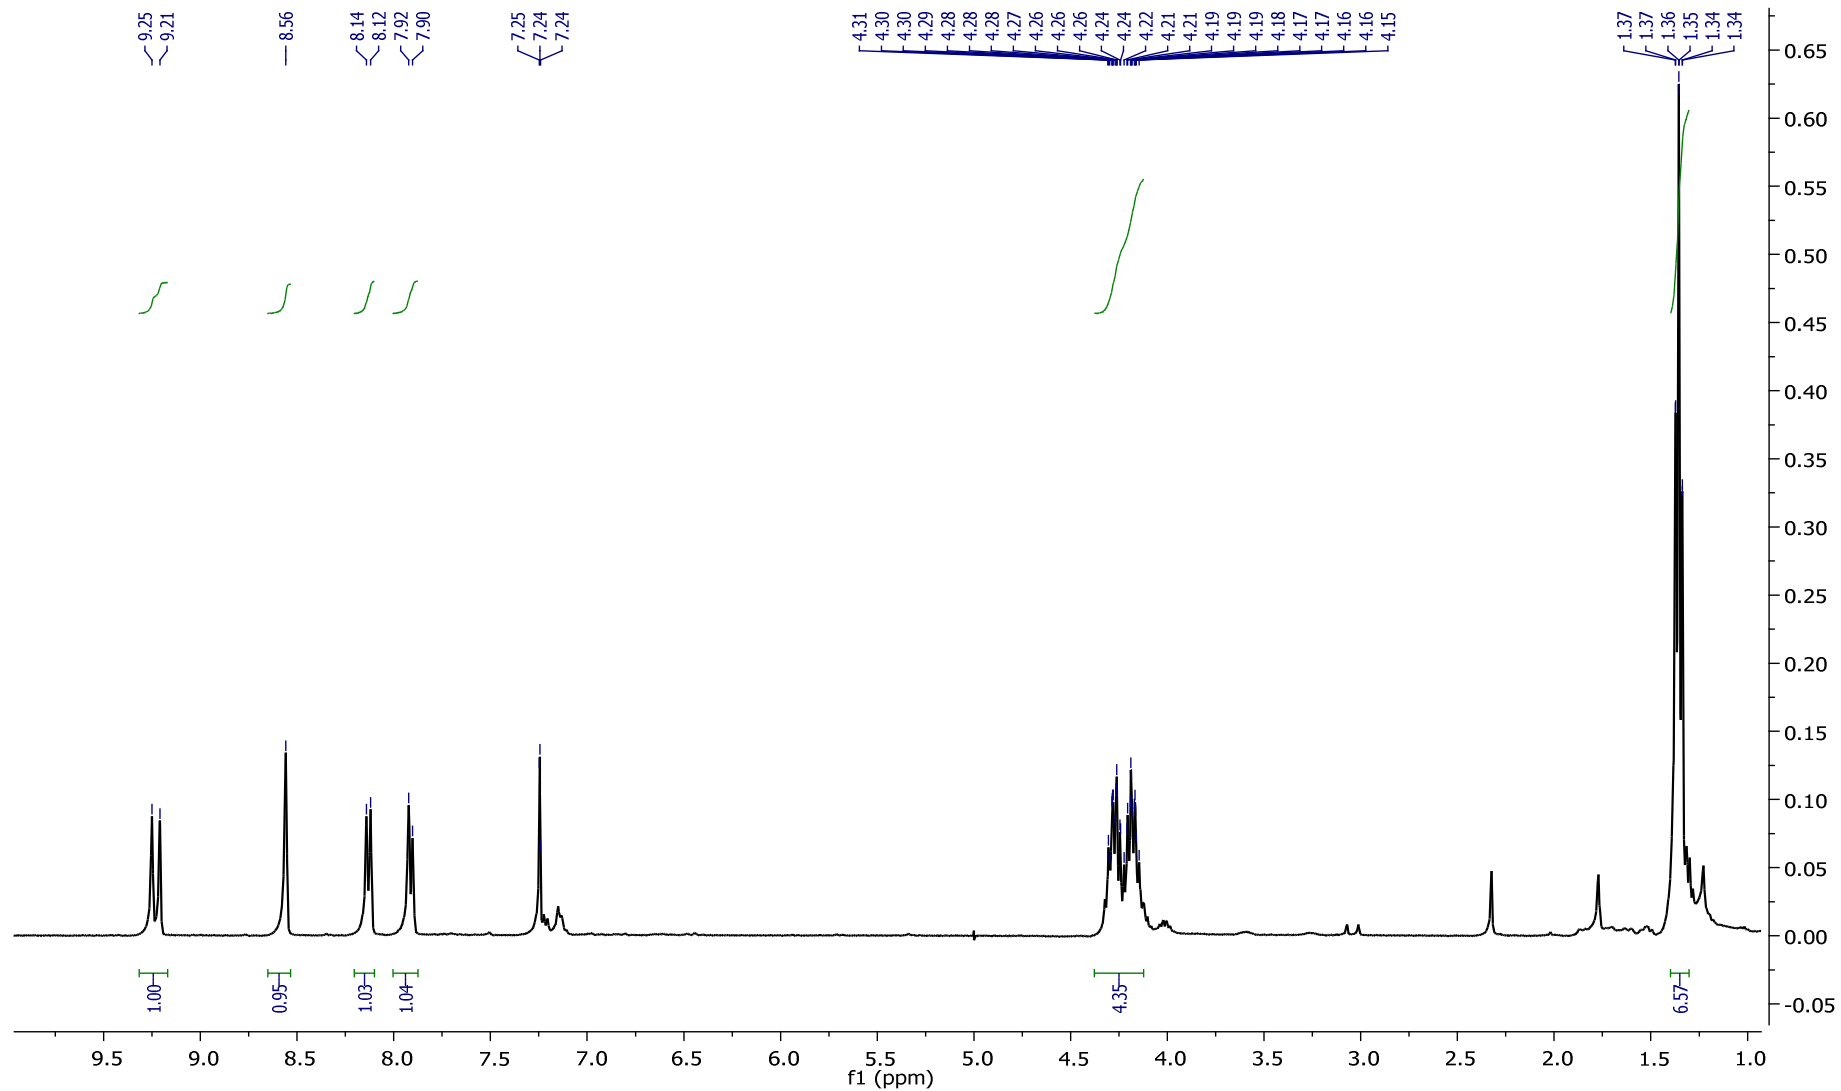

$^{13}\text{C}$  NMR

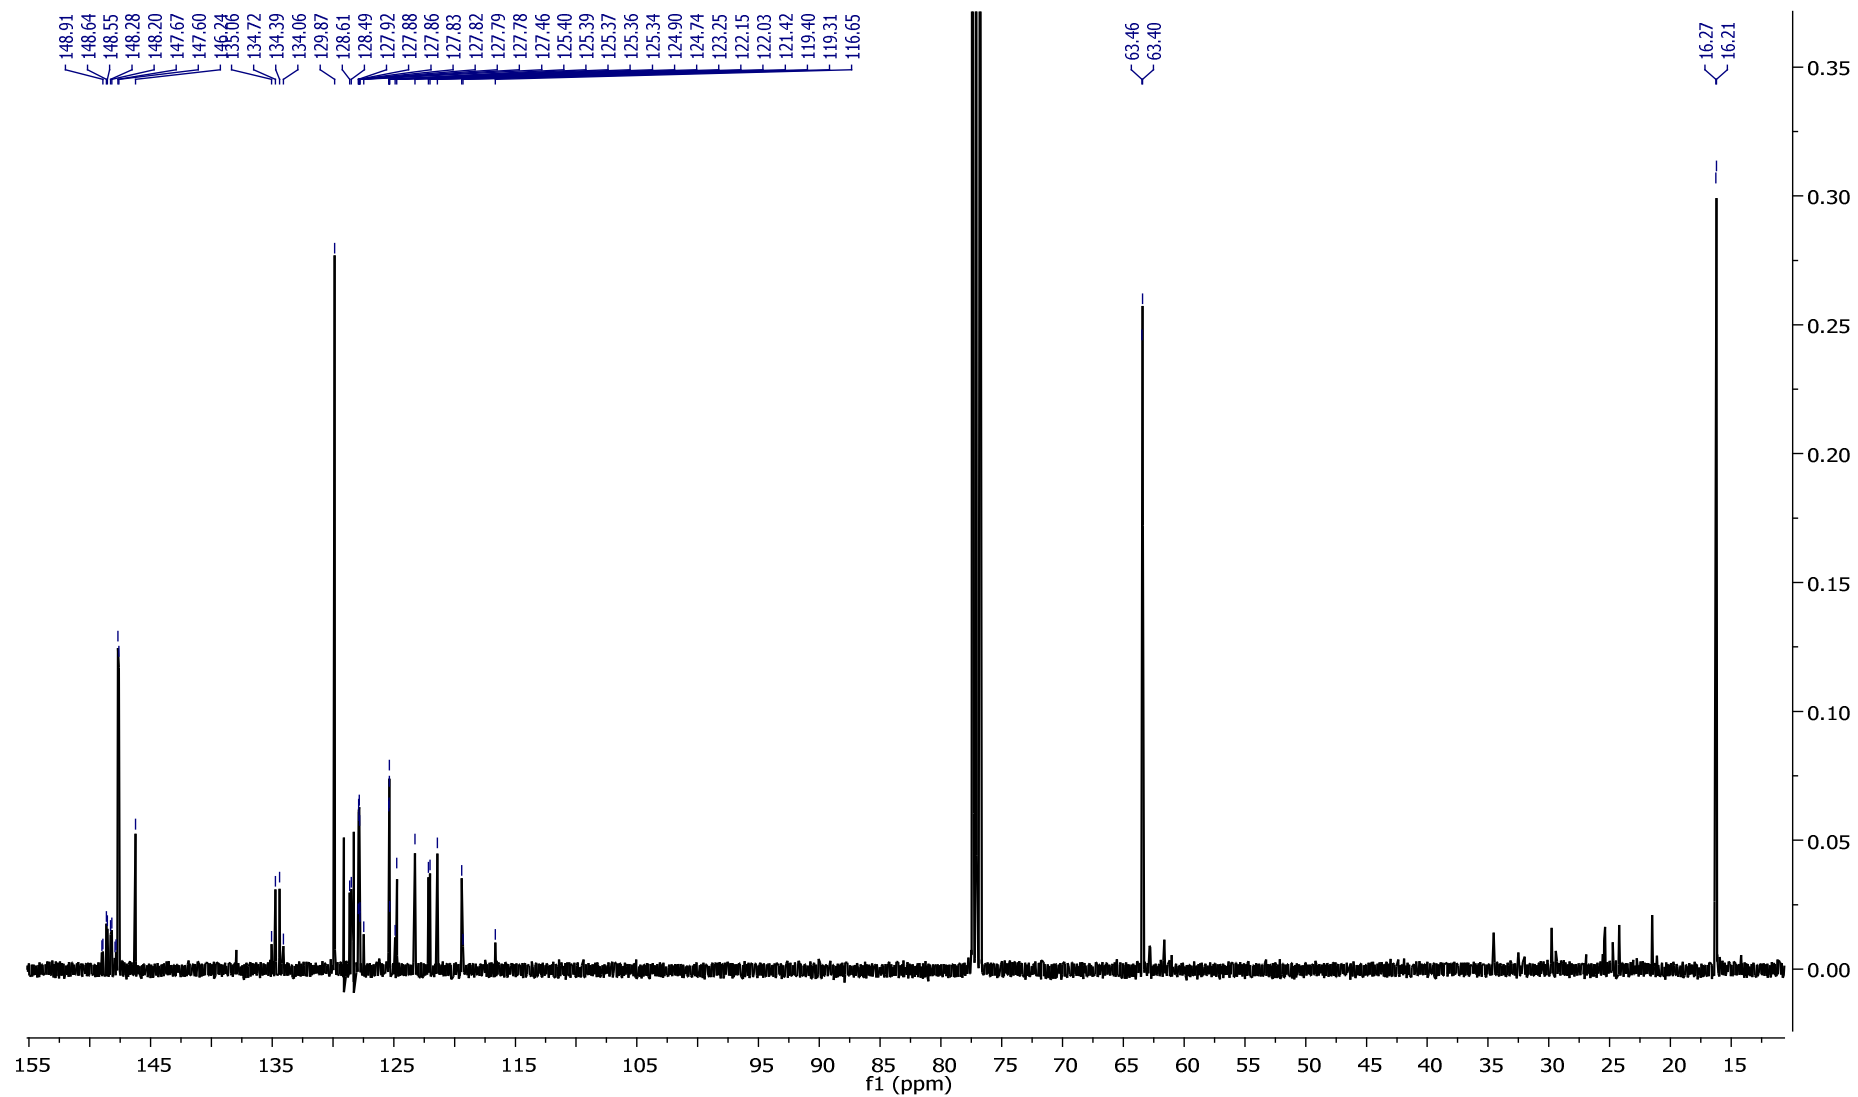

$^{19}\text{F}$  NMR

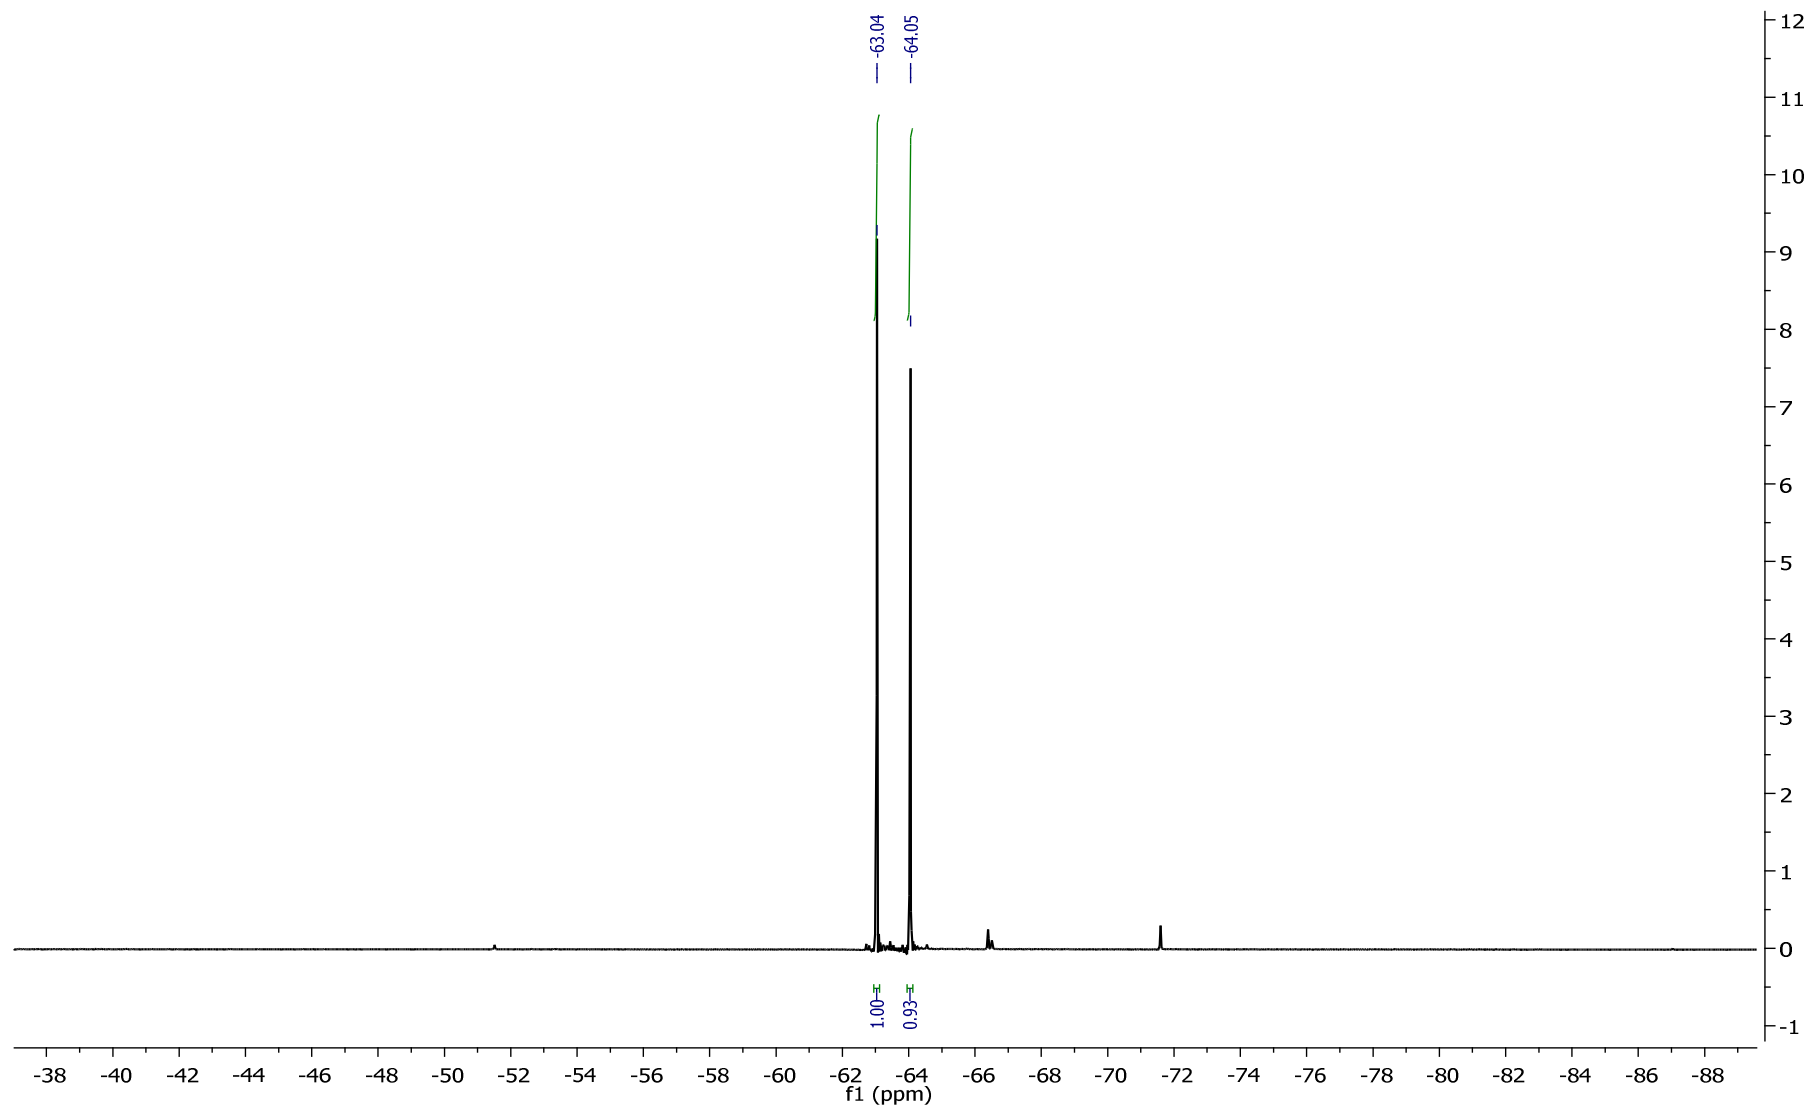

$^{31}\text{P}$  NMR

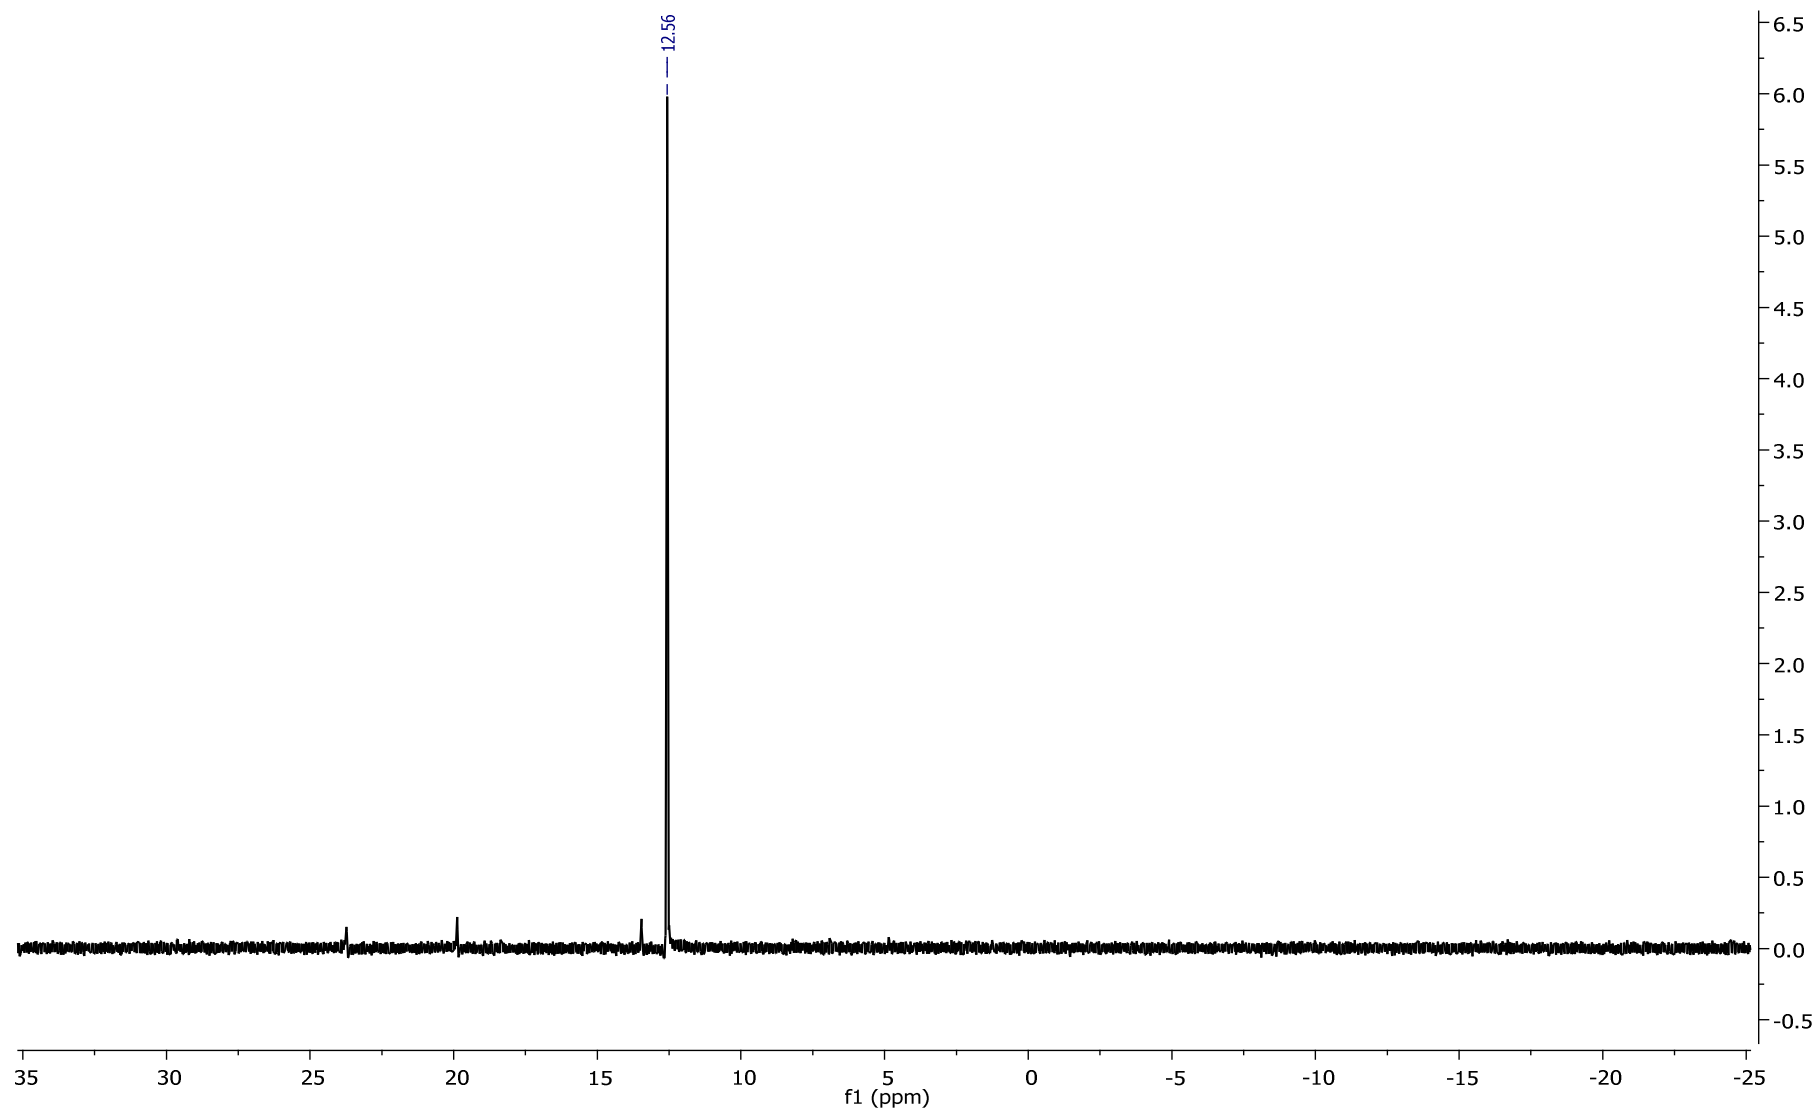



5. Diethyl (2-(chlorodifluoromethyl)quinolin-3-yl)phosphonate **4e**

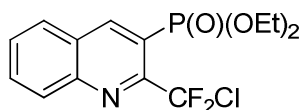

Yellowish oil (90%);  $^1\text{H}$  NMR (400 MHz,  $\text{CDCl}_3$ )  $\delta$  1.34 (t,  $J = 7.0$  Hz, 6H), 4.15 (m, 2H), 4.22 (m, 2H), 7.69 (td,  $J = 8.1$  Hz,  $J = 1.1$  Hz, 1H), 7.87 (tt,  $J = 6.9$  Hz,  $J = 1.4$  Hz, 1H), 7.94 (d,  $J = 8.1$  Hz, 1H), 8.18 (d,  $J = 8.6$  Hz, 1H), 9.13 (d,  $^3J_{\text{H-P}} = 16.4$  Hz, 1H);  $^{13}\text{C}$  NMR (161 MHz)  $\delta$  16.3 (d,  $J = 6.7$  Hz), 63.1 (d,  $J = 6.2$  Hz), 118.5 (d,  $^1J_{\text{C-P}} = 186.7$  Hz), 124.1 (t,  $^1J_{\text{C-F}} = 294.2$  Hz), 126.8 (d,  $^3J_{\text{C-P}} = 11.7$  Hz), 128.5, 129.5 (d,  $^5J_{\text{C-P}} = 1.2$  Hz), 129.8 (d,  $^4J_{\text{C-P}} = 1.5$  Hz), 133.0, 147.2 (dt,  $^4J_{\text{C-P}} = 1.4$  Hz,  $^4J_{\text{C-F}} = 0.9$  Hz), 147.8 (d,  $^2J_{\text{C-P}} = 7.2$  Hz), 151.3 (td,  $^2J_{\text{C-F}} = 29.7$  Hz,  $^2J_{\text{C-P}} = 8.7$  Hz);  $^{19}\text{F}$  NMR (376 MHz)  $\delta$  -51.9;  $^{31}\text{P}$  NMR (161 MHz)  $\delta$  13.9; HRMS (ESI): calcd for  $\text{C}_{14}\text{H}_{15}\text{ClF}_2\text{NNaO}_3\text{P}$   $[\text{M}+\text{Na}]^+$  372.0338, found 372.0323.

<sup>1</sup>H NMR

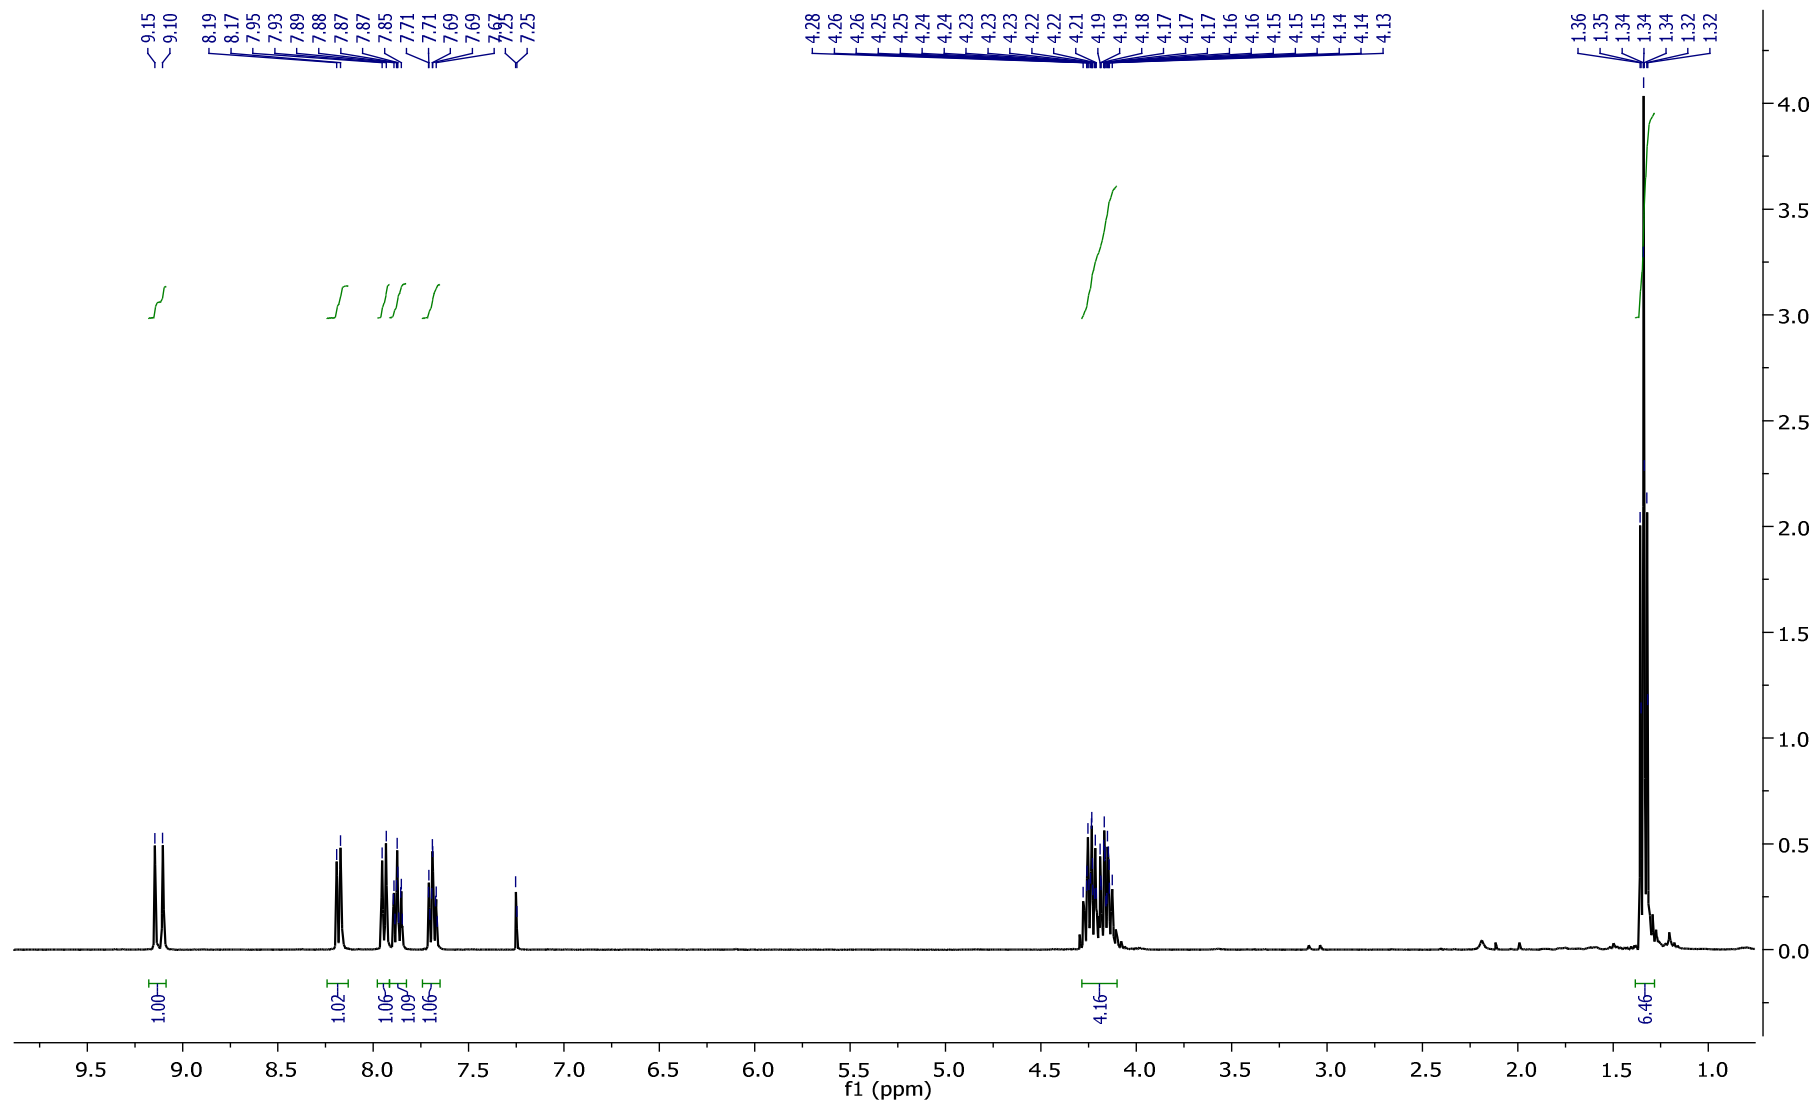

<sup>13</sup>C NMR

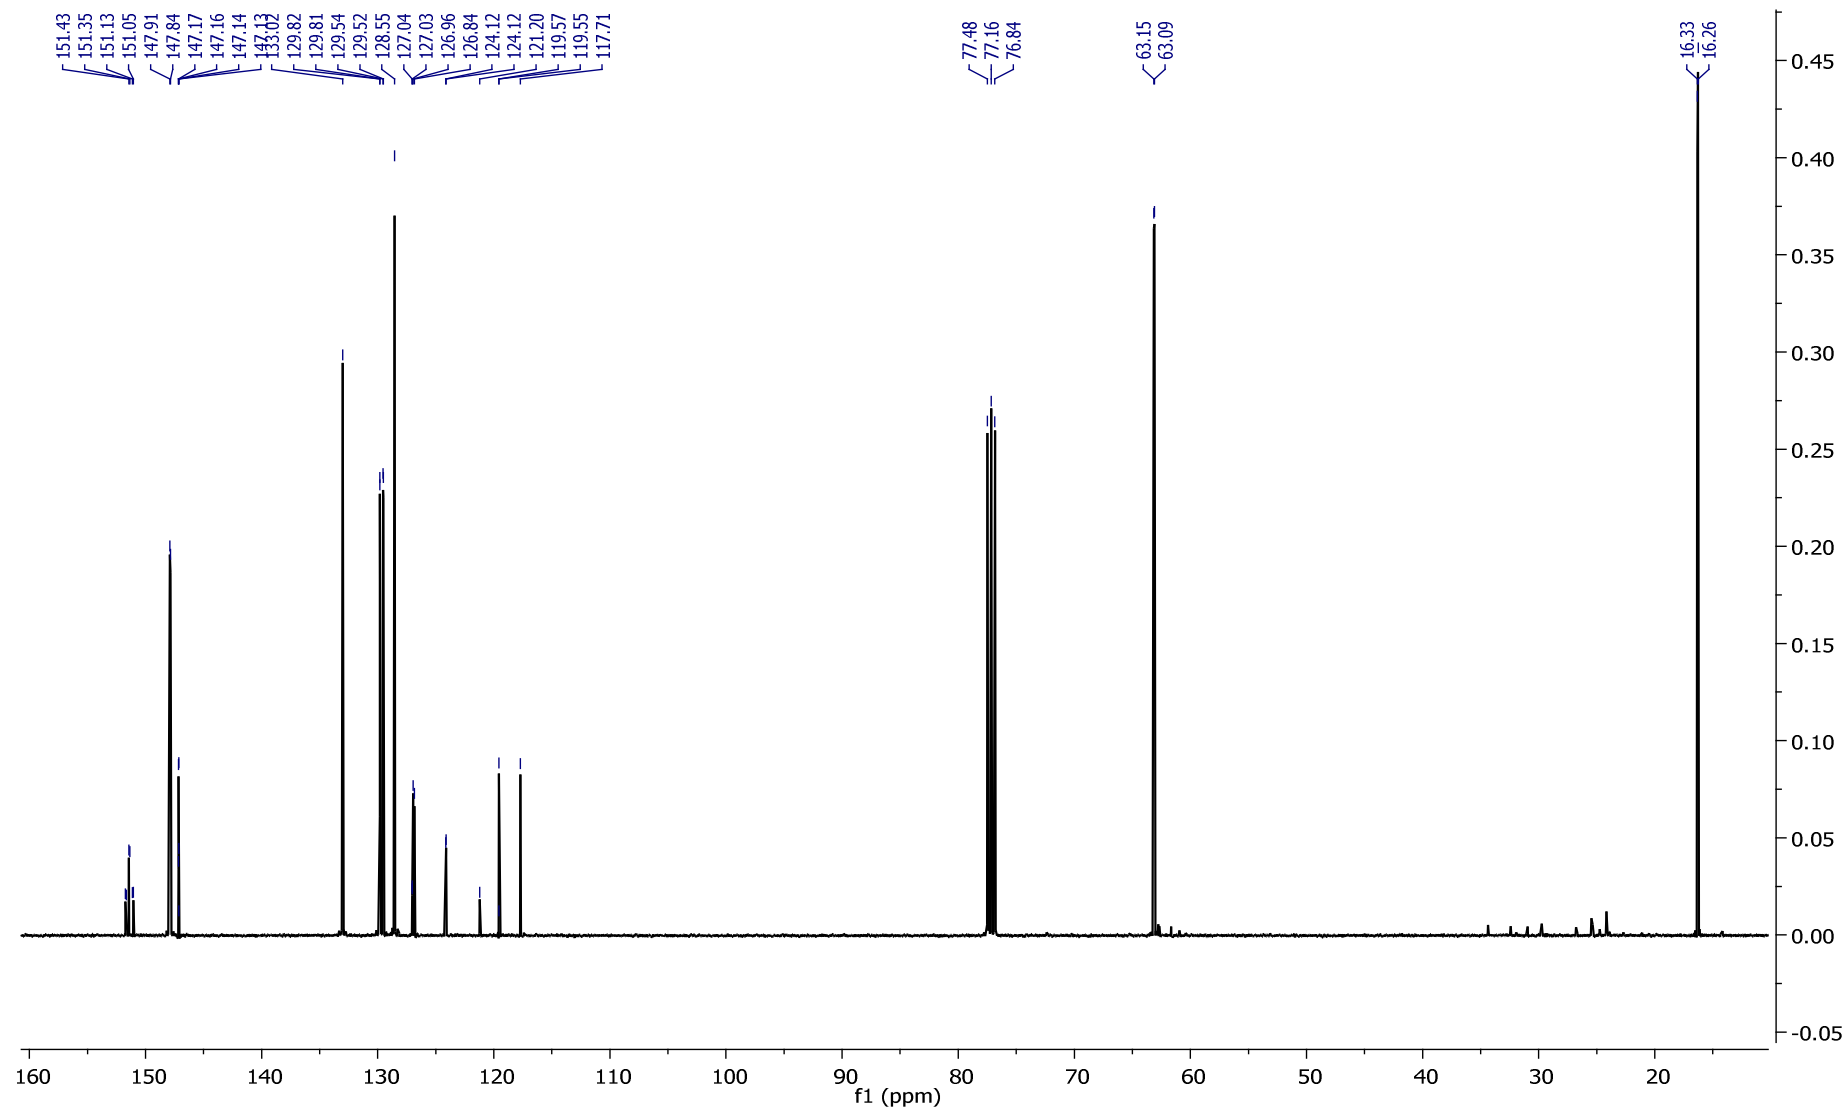

$^{19}\text{F}$  NMR

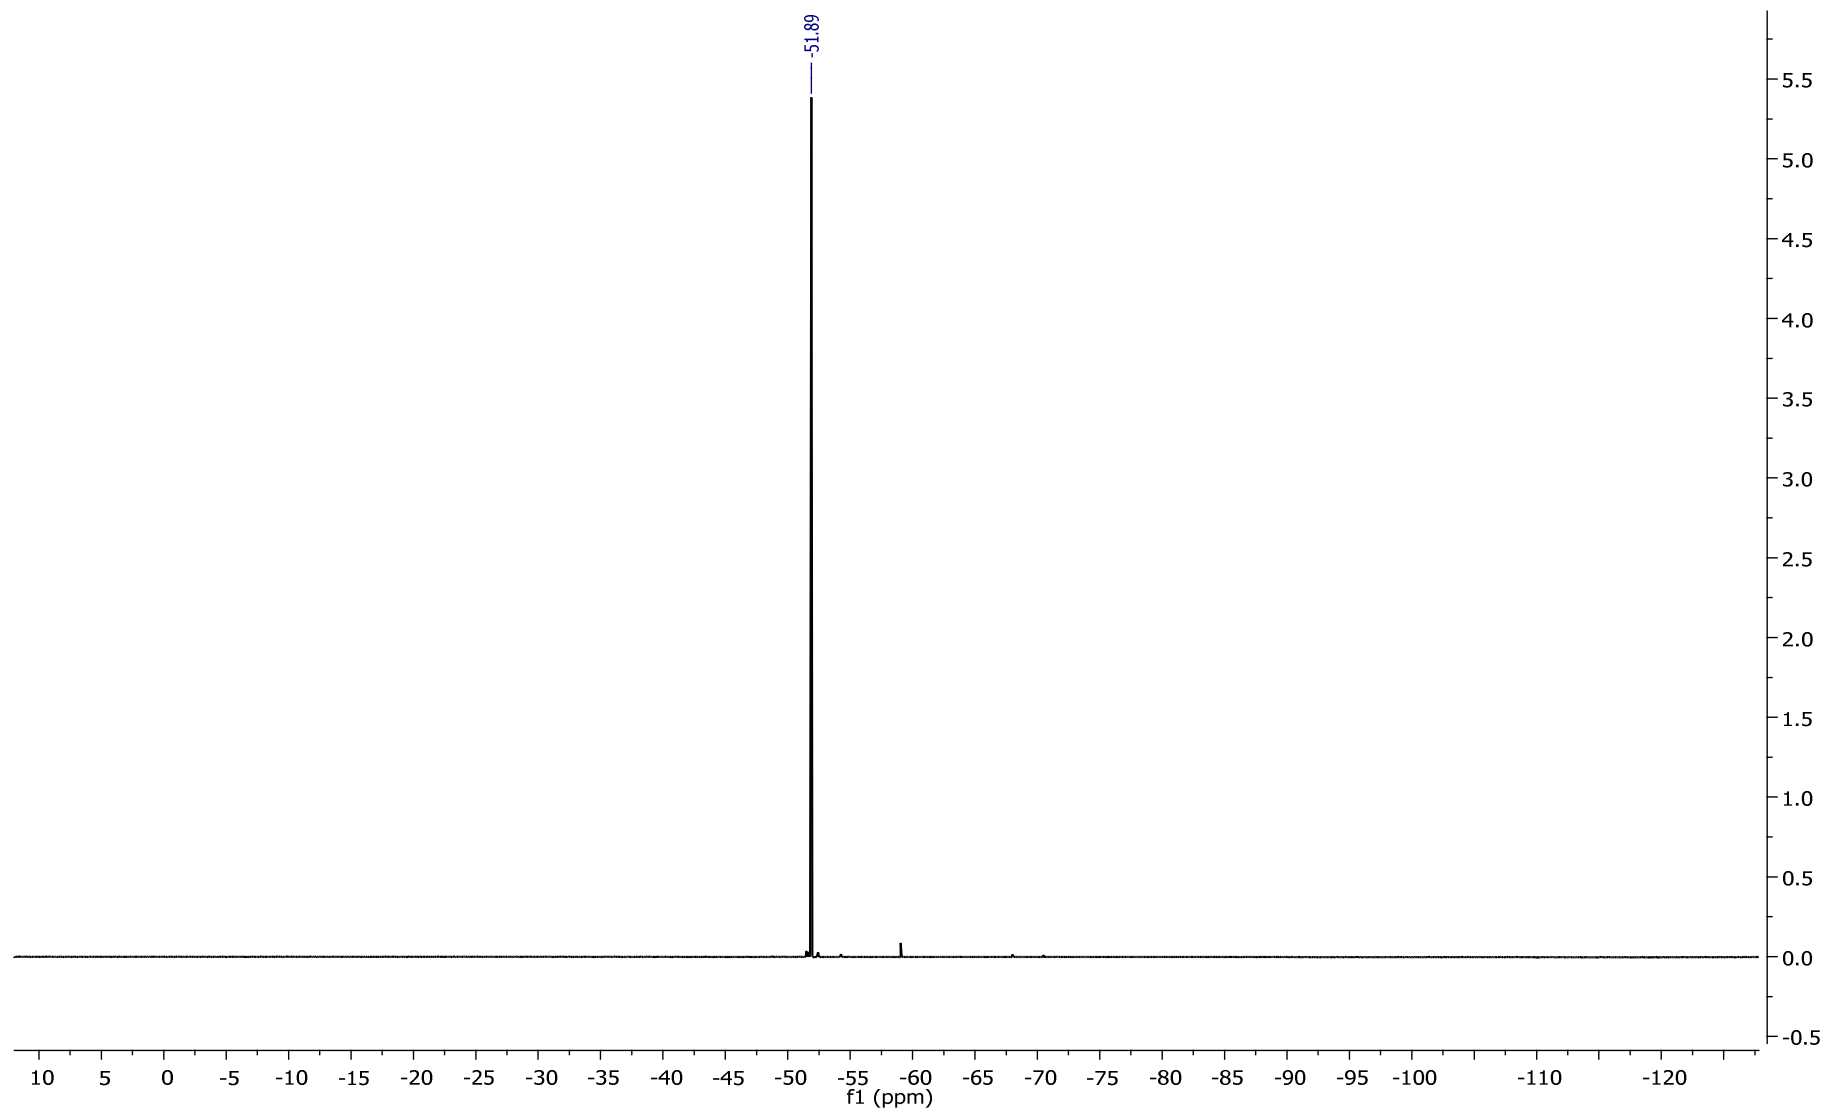

$^{31}\text{P}$  NMR

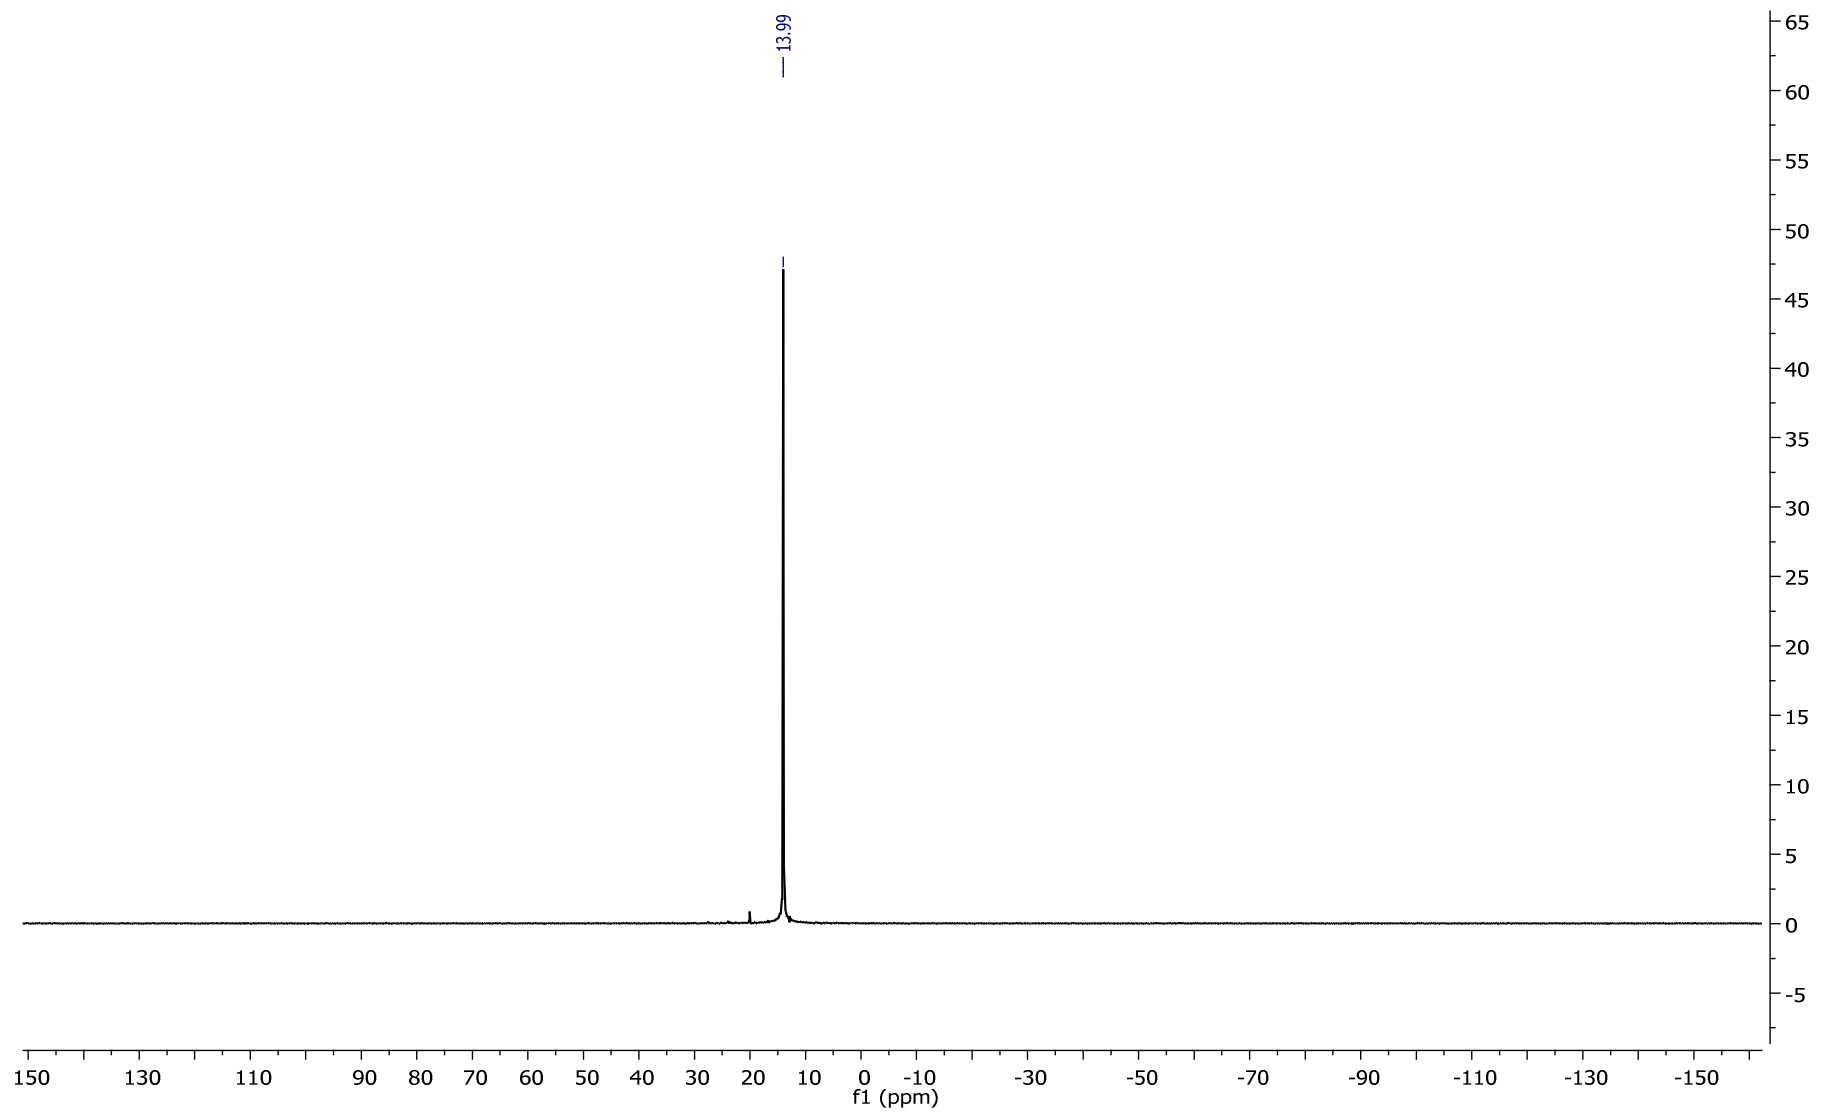

6. Diethyl (6-chloro-2-(chlorodifluoromethyl)quinolin-3-yl)phosphonate **4f**

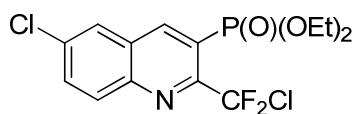

Colourless crystals (81%); Mp = 74–77 °C;  $^1\text{H}$  NMR (400 MHz,  $\text{CDCl}_3$ )  $\delta$  1.35 (t,  $J = 6.9$  Hz, 6H), 4.16 (m, 2H), 4.22 (m, 2H), 7.82 (dd,  $J = 9.1$  Hz,  $J = 2.2$  Hz, 1H), 7.94 (d,  $J = 2.1$  Hz, 1H), 8.14 (d,  $J = 8.8$  Hz, 1H), 9.05 (d,  $^3J_{\text{H-P}} = 16.3$  Hz, 1H);  $^{13}\text{C}$  NMR (100 MHz)  $\delta$  16.3 (d,  $J = 6.5$  Hz), 63.3 (d,  $J = 6.3$  Hz), 119.8 (d,  $^1J_{\text{C-P}} = 186.7$  Hz), 123.9 (td,  $^1J_{\text{C-F}} = 293.0$  Hz,  $^3J_{\text{C-P}} = 2.1$  Hz), 127.1, 127.5 (d,  $^3J_{\text{C-P}} = 12.5$  Hz), 131.5 (d,  $^4J_{\text{C-P}} = 1.9$  Hz), 133.9, 135.6 (d,  $^5J_{\text{C-P}} = 1.5$  Hz), 145.5 (dt,  $^4J_{\text{C-P}} = 1.3$  Hz,  $^4J_{\text{C-F}} = 0.9$  Hz), 146.7 (d,  $^2J_{\text{C-P}} = 7.1$  Hz), 151.7 (td,  $^2J_{\text{C-F}} = 30.1$  Hz,  $^2J_{\text{C-P}} = 8.6$  Hz);  $^{19}\text{F}$  NMR (376 MHz)  $\delta$  -52.1;  $^{31}\text{P}$  NMR (161 MHz)  $\delta$  13.3; HRMS (ESI): calcd for  $\text{C}_{14}\text{H}_{14}\text{Cl}_2\text{F}_2\text{NNaO}_3\text{P}$   $[\text{M}+\text{Na}]^+$  405.9949, found 405.9955.

# <sup>1</sup>H NMR

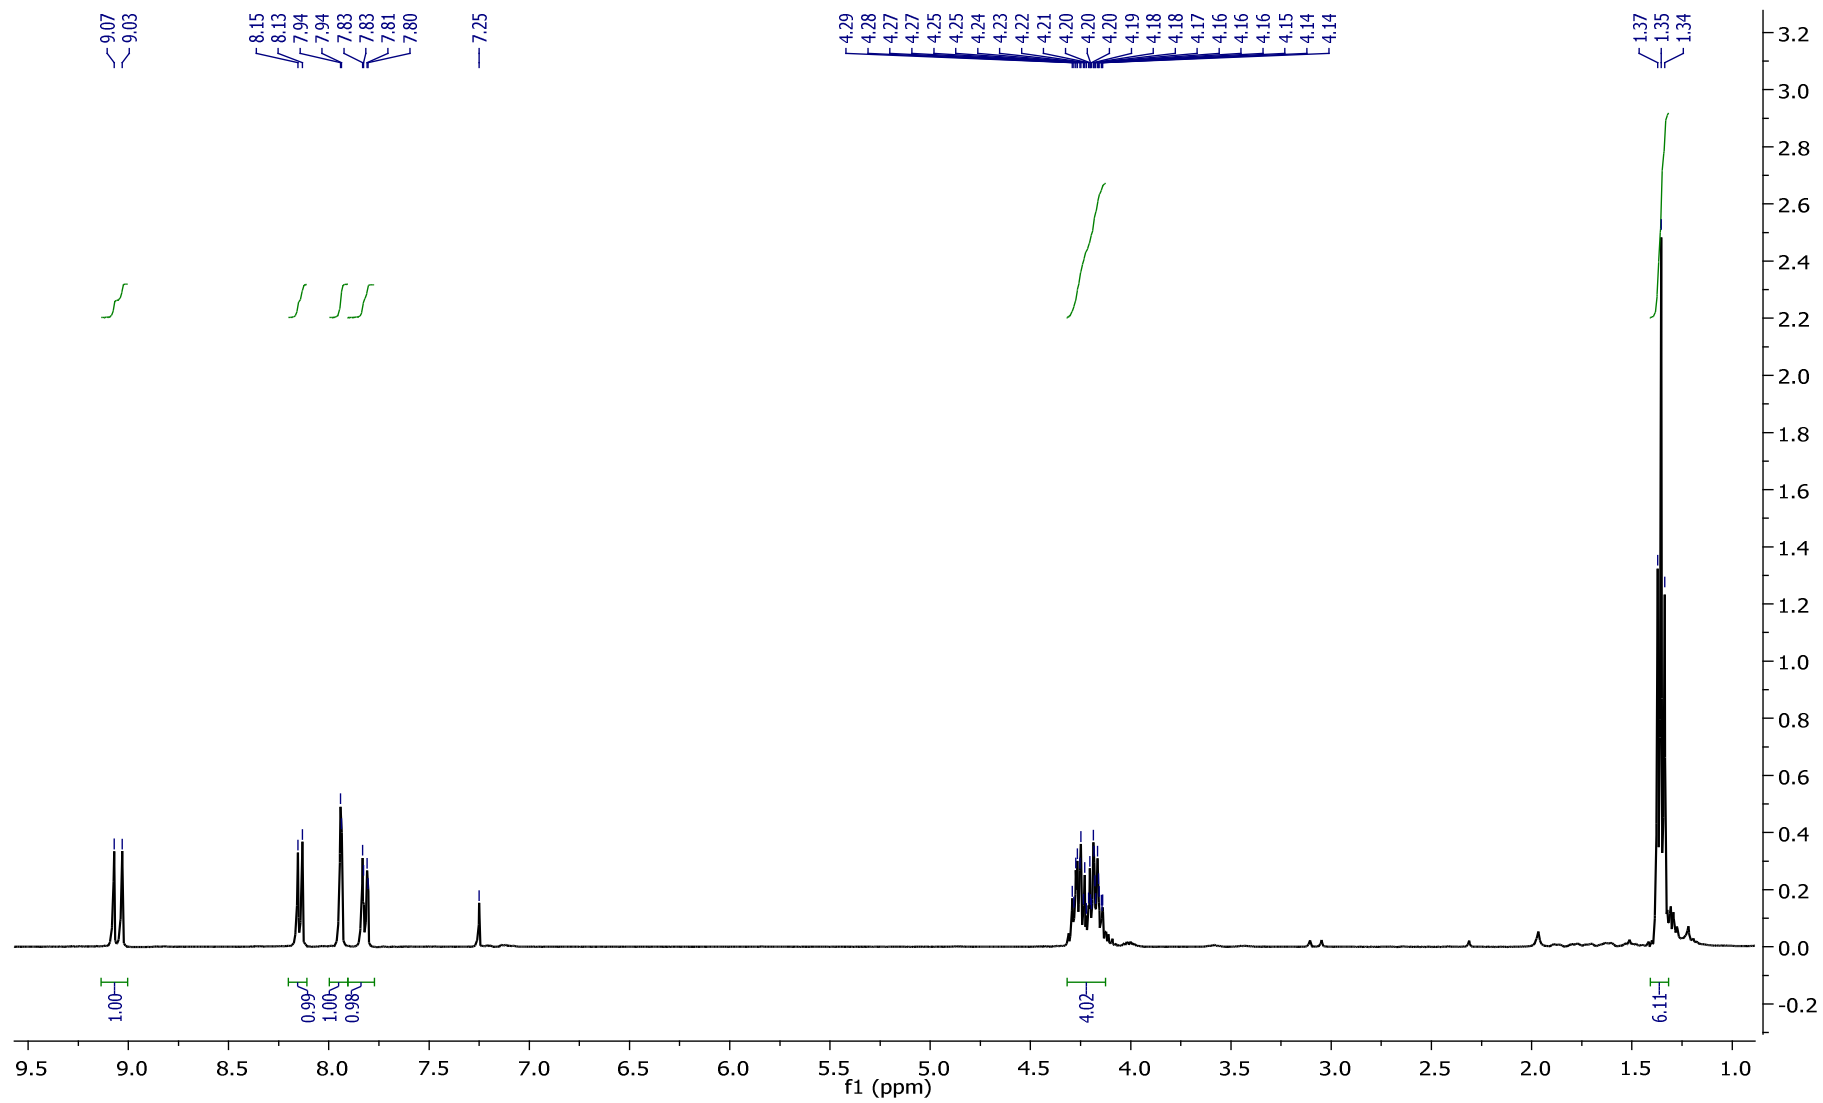

$^{13}\text{C}$  NMR

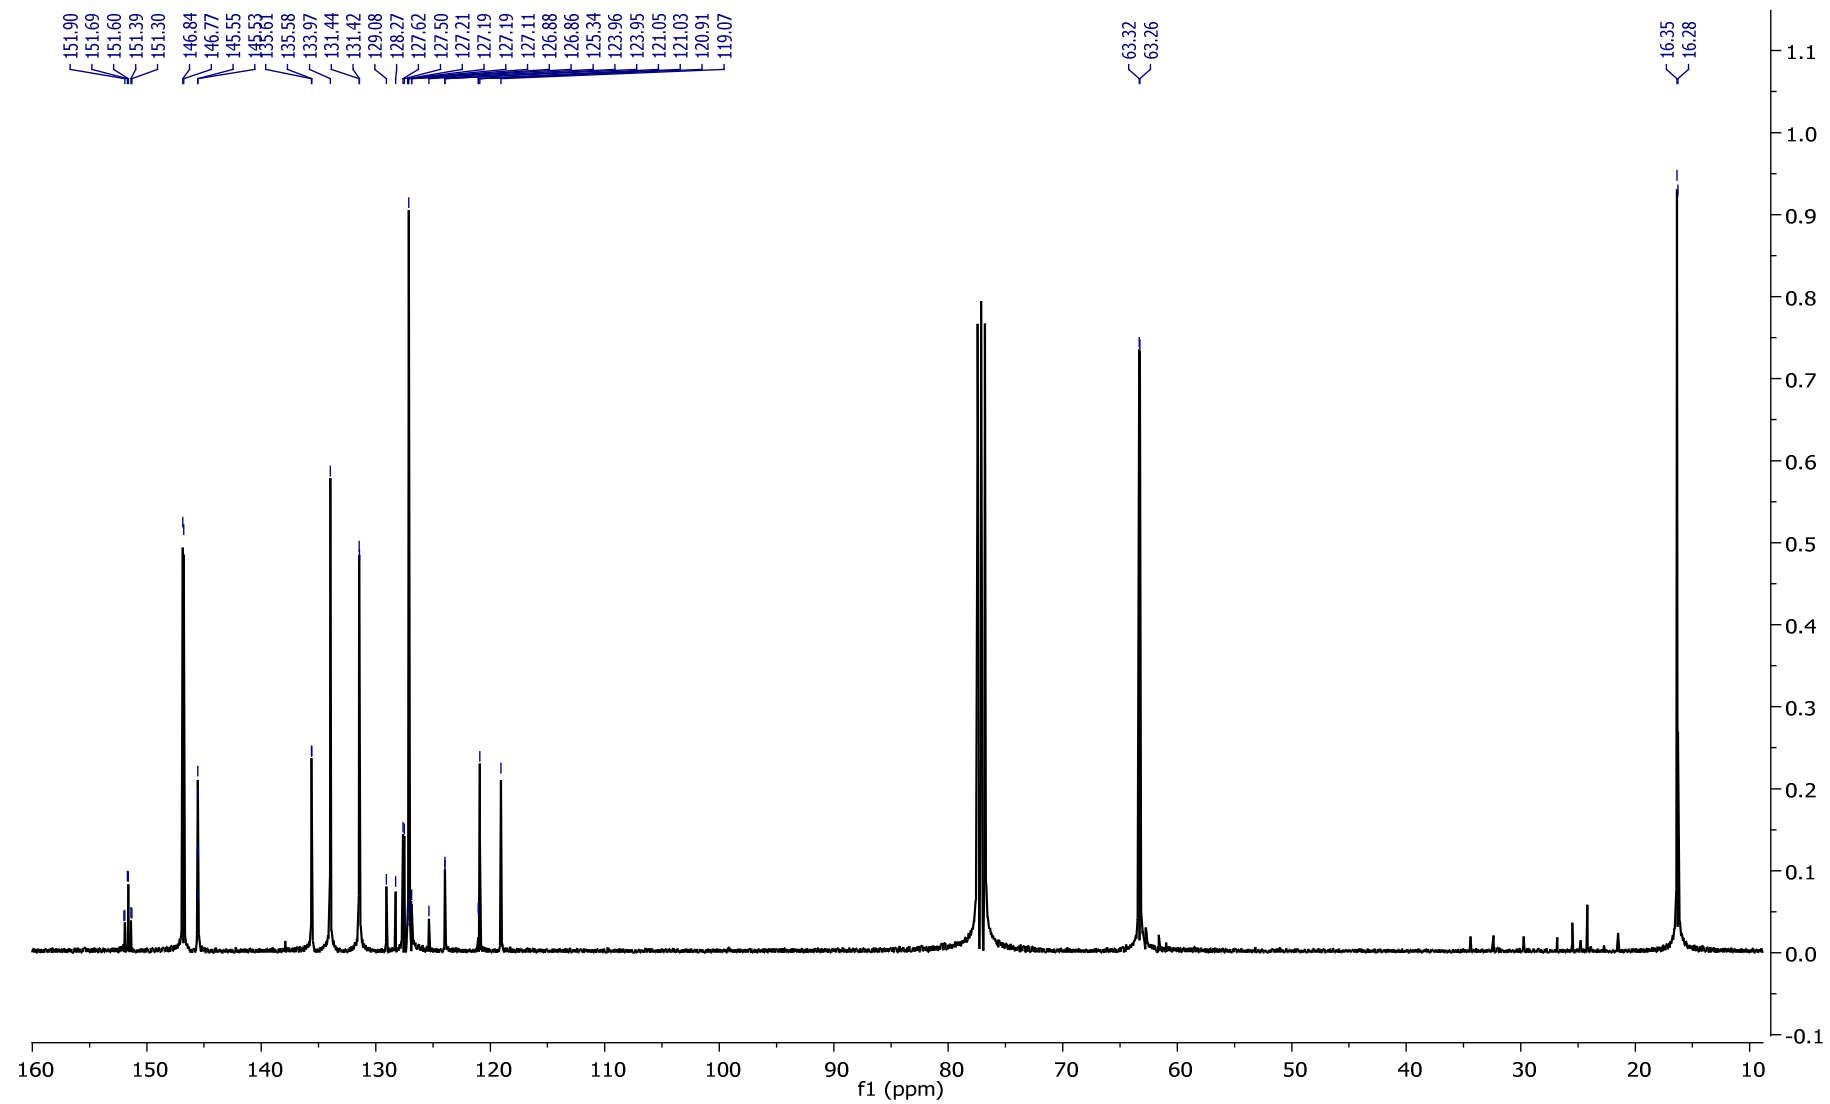



$^{19}\text{F}$  NMR

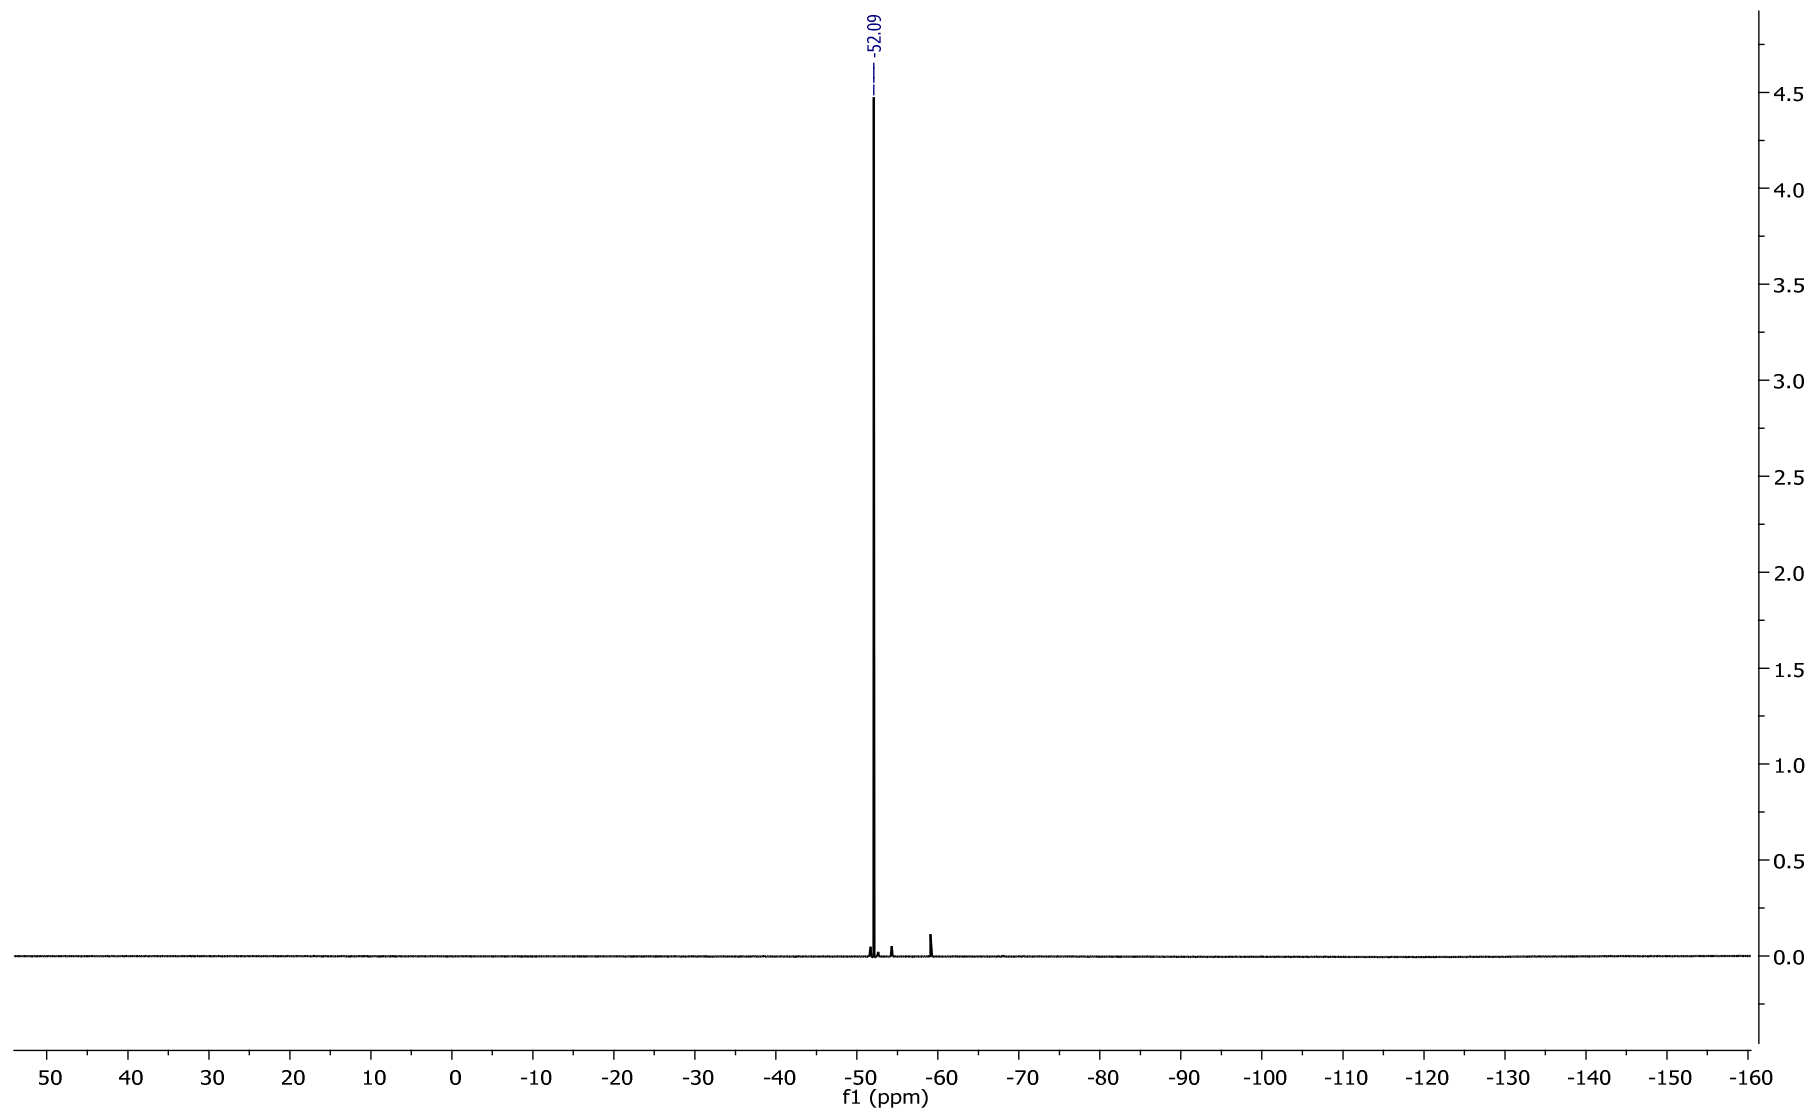

$^{31}\text{P}$  NMR

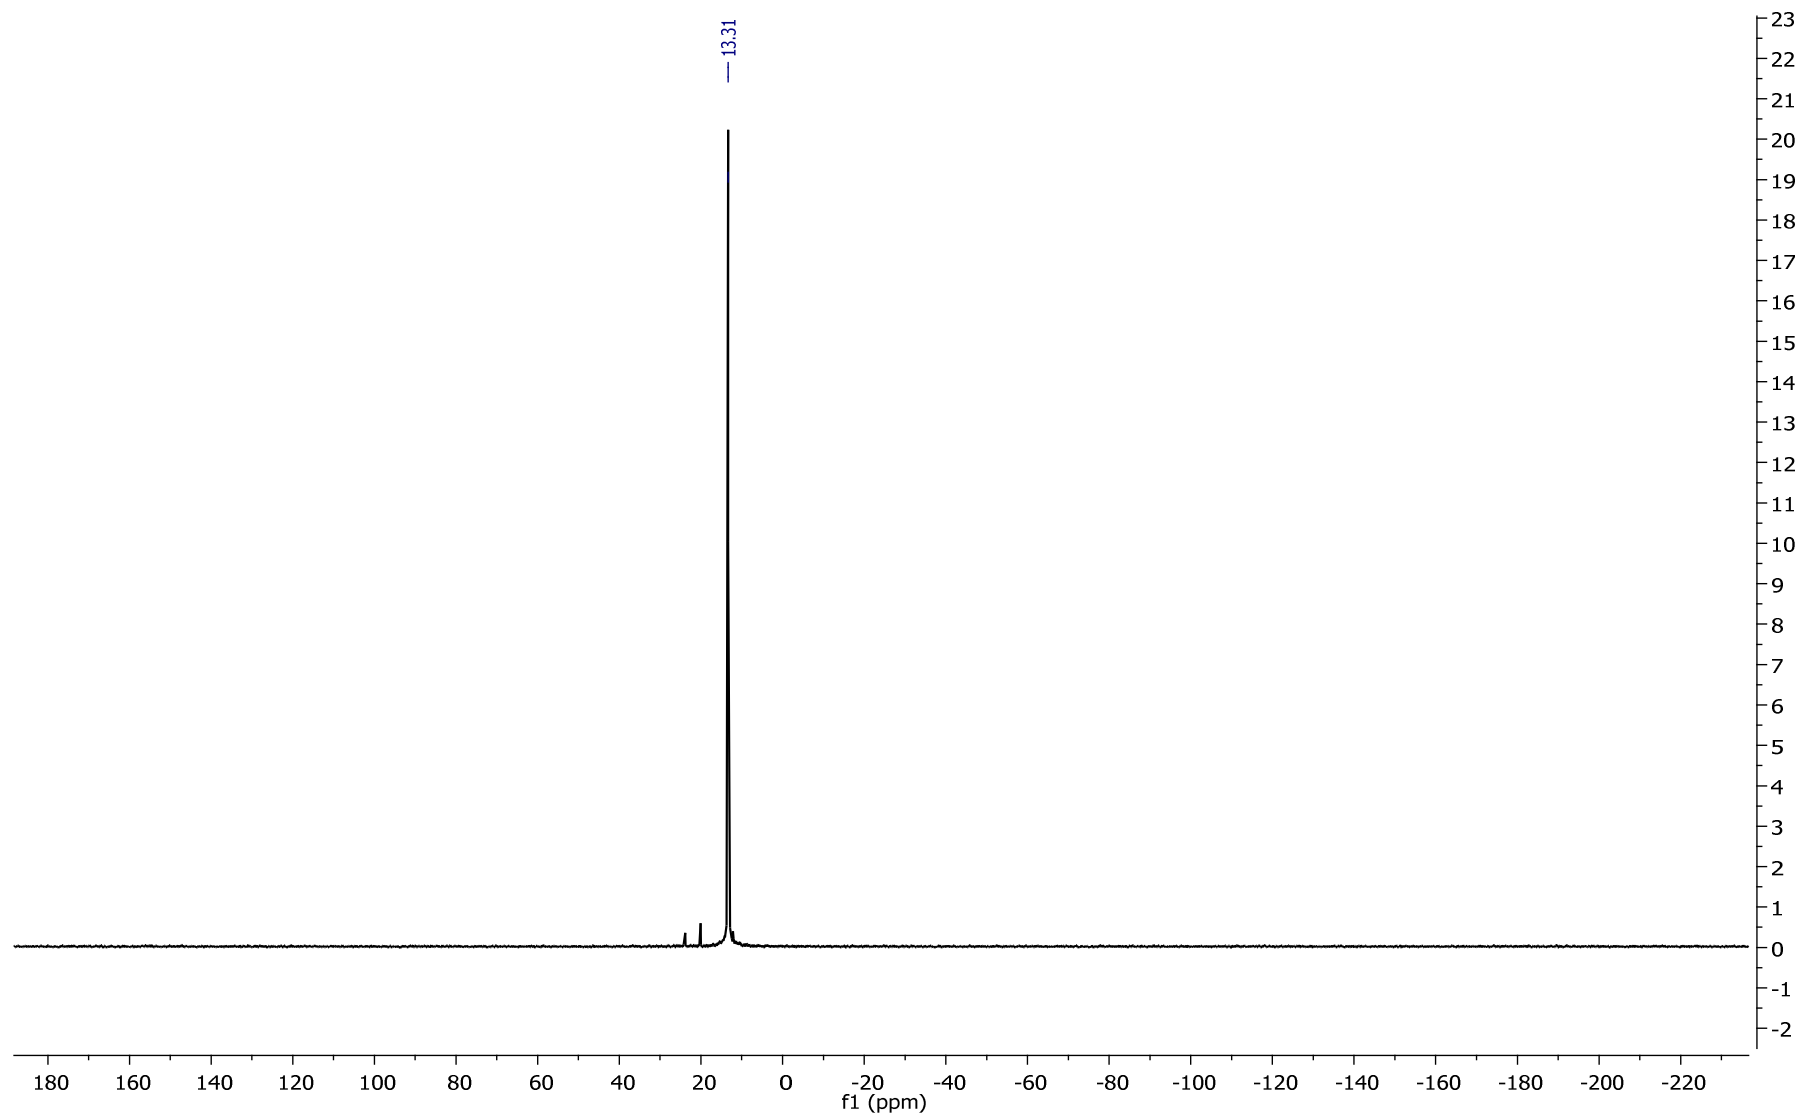

7. Diethyl (2-(chlorodifluoromethyl)-6,7-dimethoxyquinolin-3-yl)phosphonate **4g**

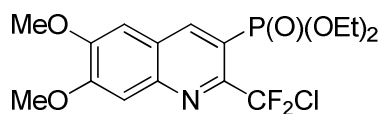

Colourless crystals (71%); Mp = 160–165 °C;  $^1\text{H}$  NMR (400 MHz,  $\text{CDCl}_3$ )  $\delta$  1.32 (t,  $J = 7.0$  Hz, 6H), 4.00 (s, 3H), 4.02 (s, 3H), 4.12 (m, 2H), 4.21 (m, 2H), 7.13 (s, 1H), 7.47 (s, 1H), 8.89 (d,  $^3J_{\text{H-P}} = 15.2$  Hz, 1H);  $^{13}\text{C}$  NMR (100 MHz)  $\delta$  16.2 (d,  $J = 6.8$  Hz), 56.3, 56.6, 62.9 (d,  $J = 6.1$  Hz), 105.3, 108.0, 116.5 (d,  $^1J_{\text{C-P}} = 187.4$  Hz), 123.2 (d,  $^3J_{\text{C-P}} = 11.8$  Hz), 124.3 (td,  $^1J_{\text{C-F}} = 293.5$  Hz,  $^3J_{\text{C-P}} = 3.6$  Hz), 144.9 (d,  $^2J_{\text{C-P}} = 7.2$  Hz), 149.6 (td,  $^2J_{\text{C-F}} = 29.5$  Hz,  $^2J_{\text{C-P}} = 7.3$  Hz), 152.1, 155.3;  $^{19}\text{F}$  NMR (376 MHz)  $\delta$  -51.3;  $^{31}\text{P}$  NMR (161 MHz)  $\delta$  14.9; HRMS (ESI): calcd for  $\text{C}_{16}\text{H}_{19}\text{ClF}_2\text{NNaO}_5\text{P}$   $[\text{M}+\text{Na}]^+$  432.0550, found 432.0558.

$^1\text{H}$  NMR

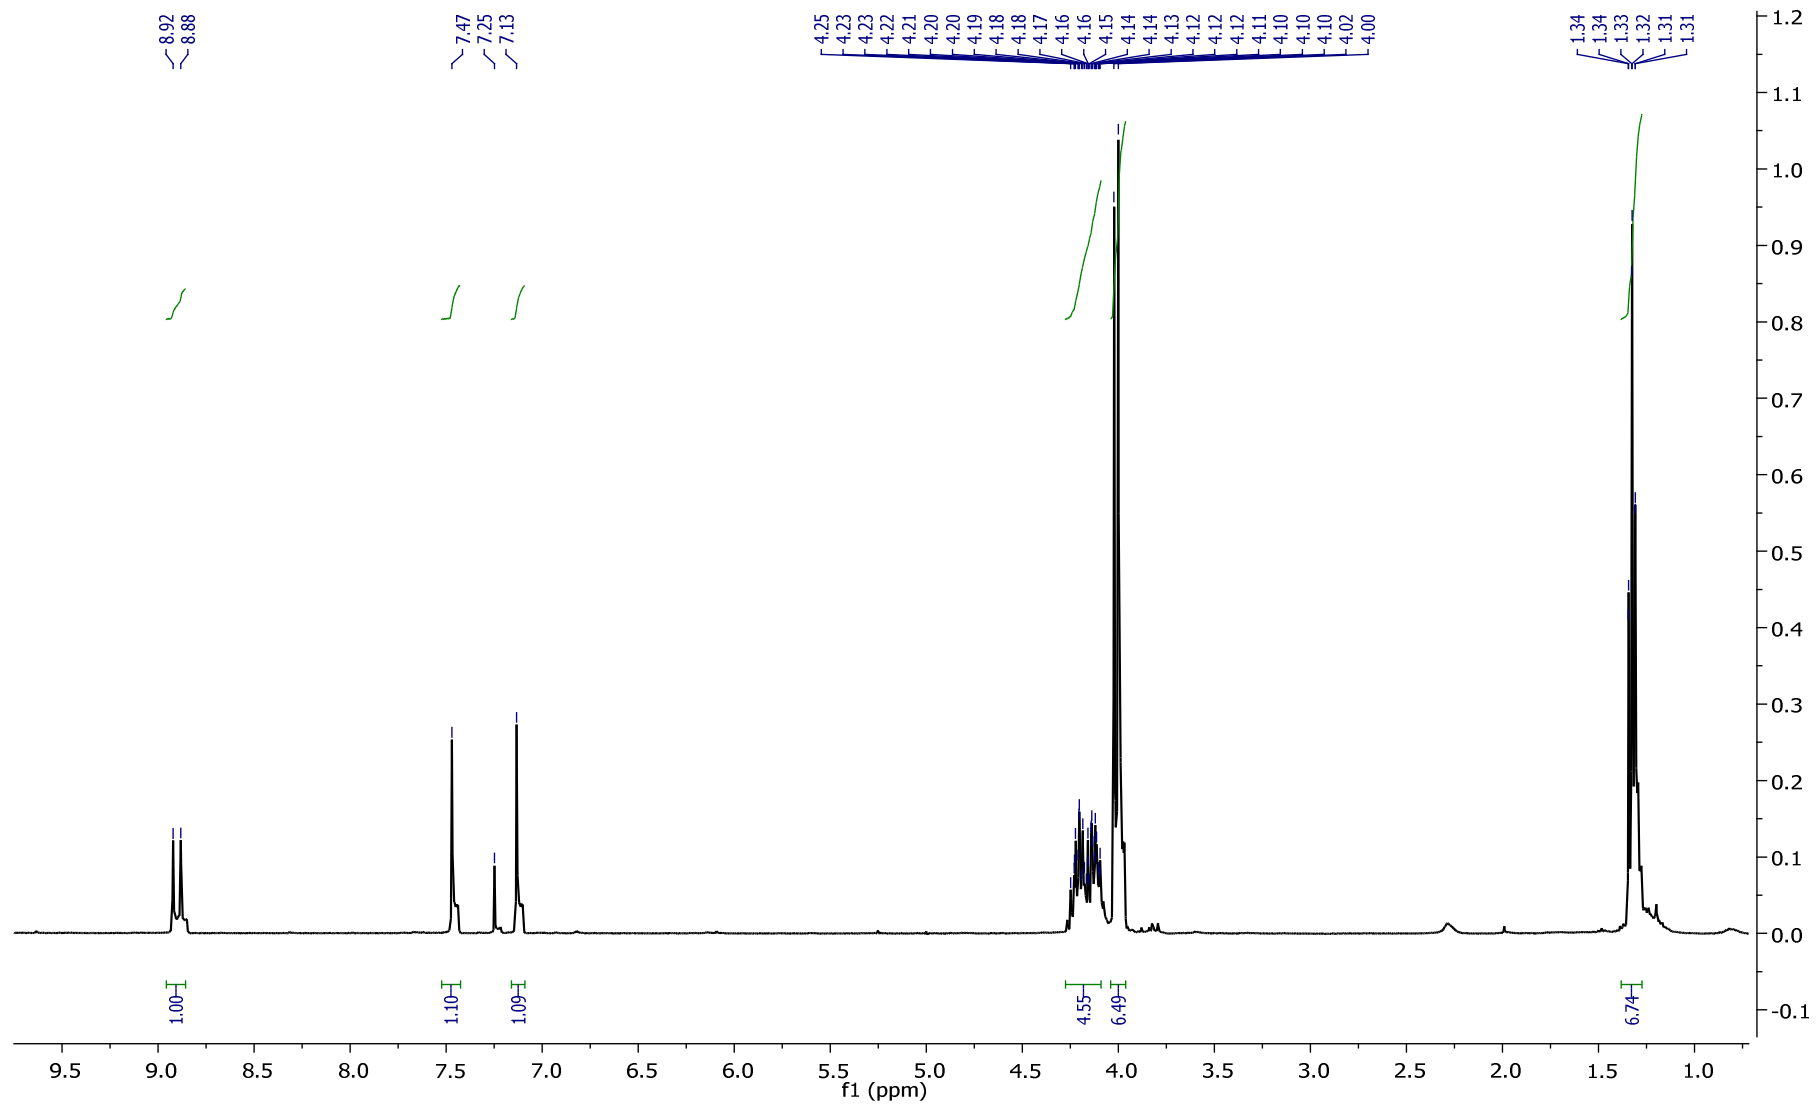

$^{13}\text{C}$  NMR

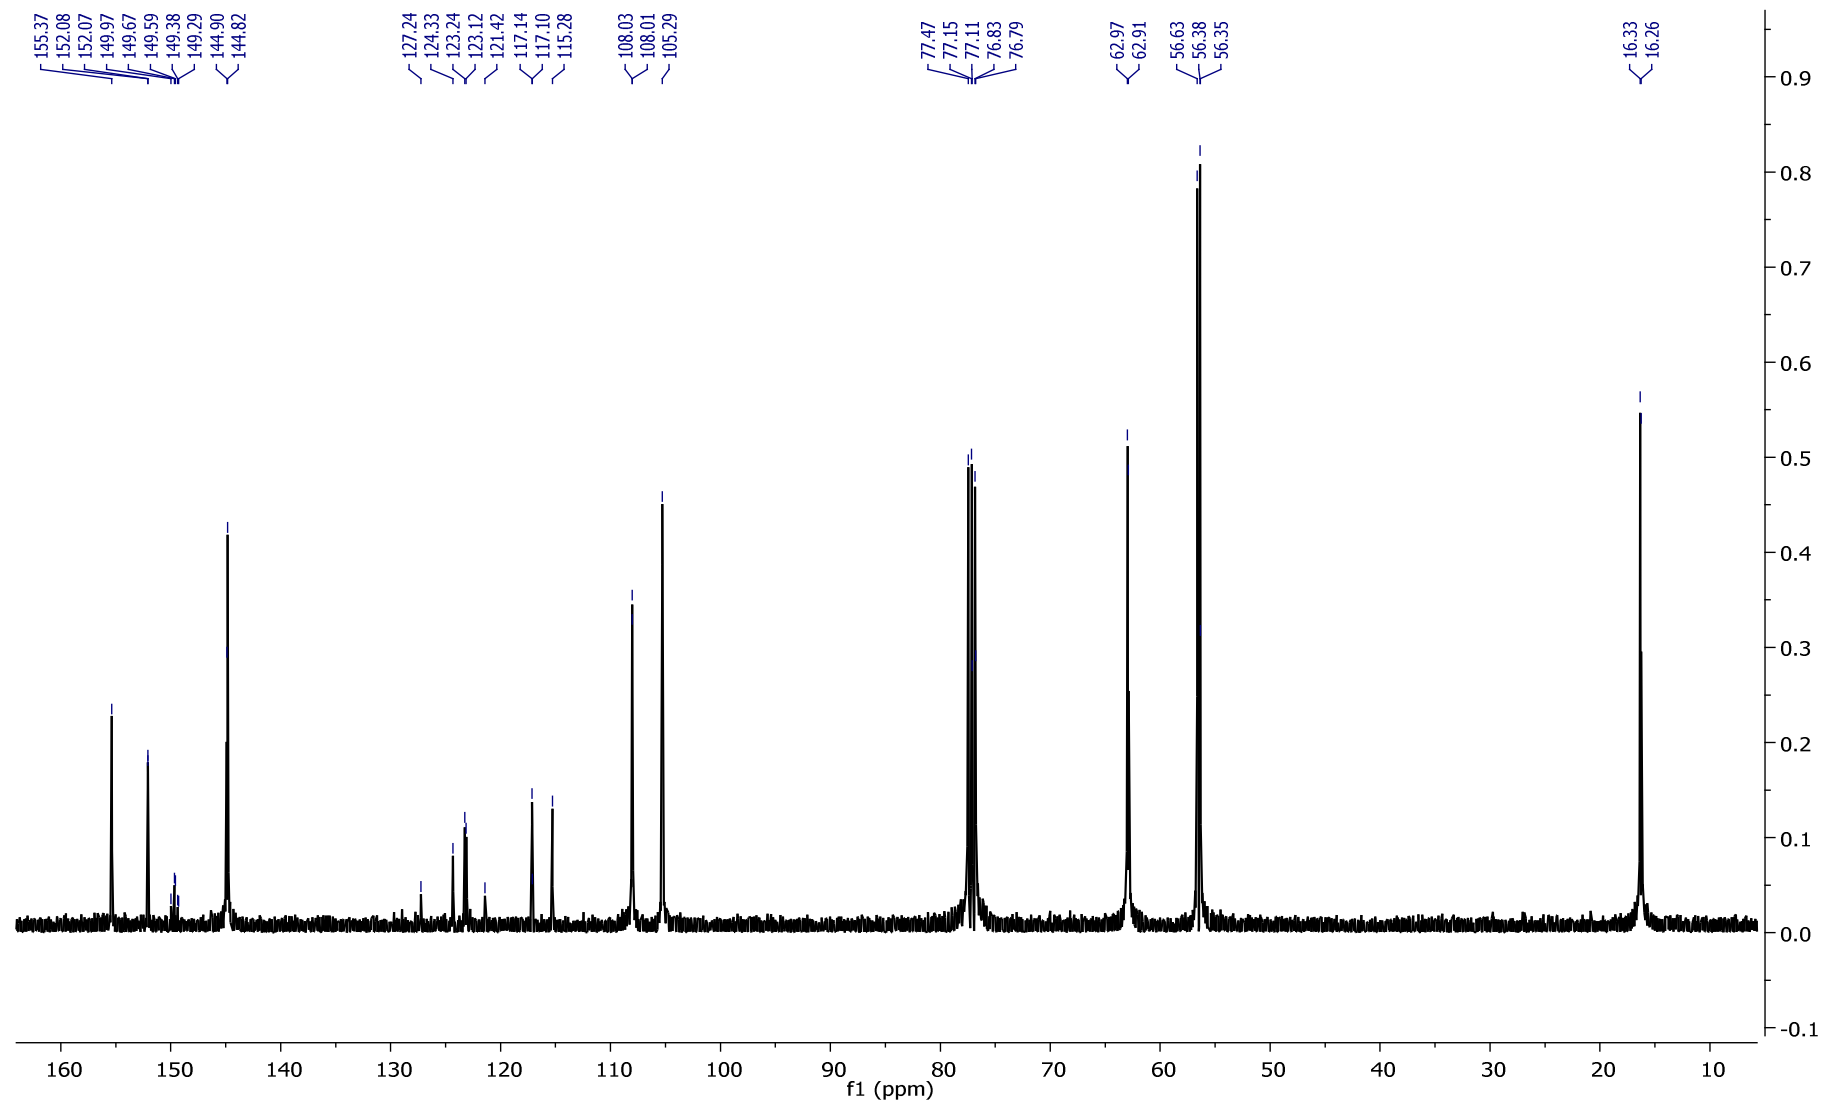

$^{19}\text{F}$  NMR

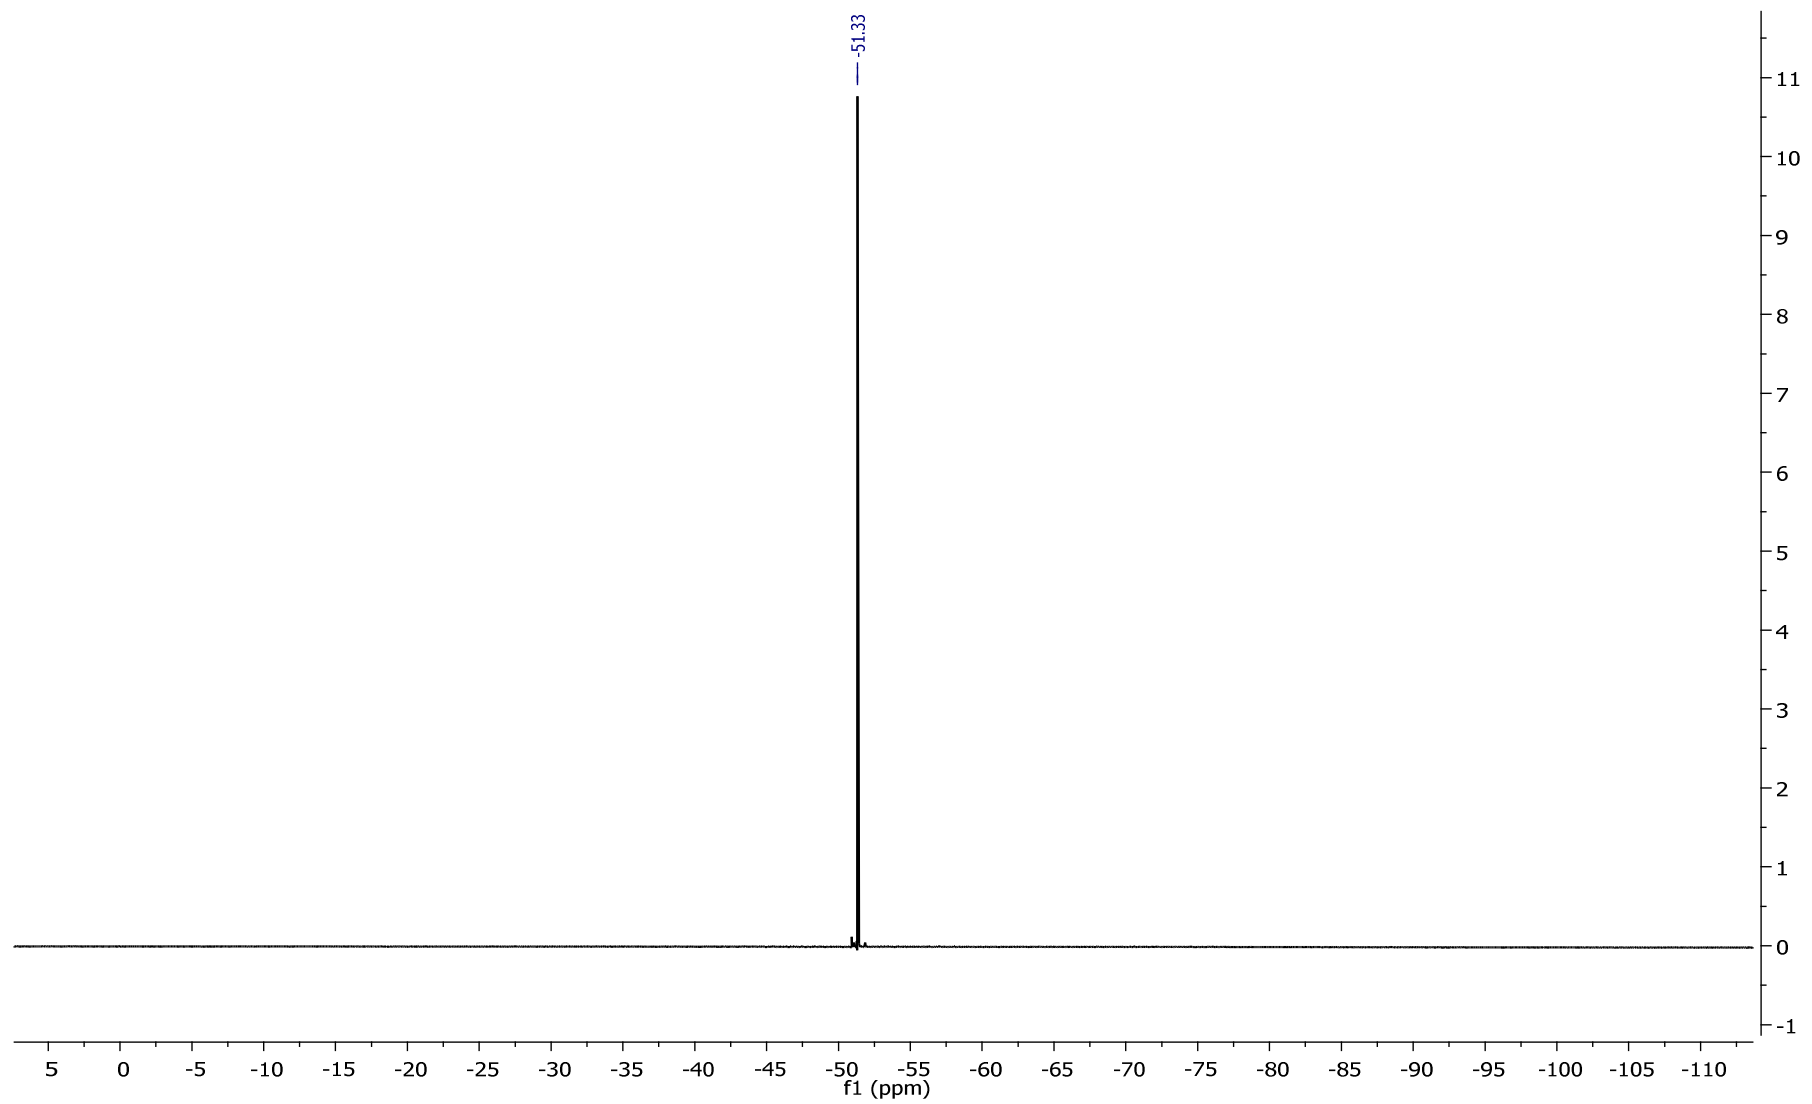

$^{31}\text{P}$  NMR

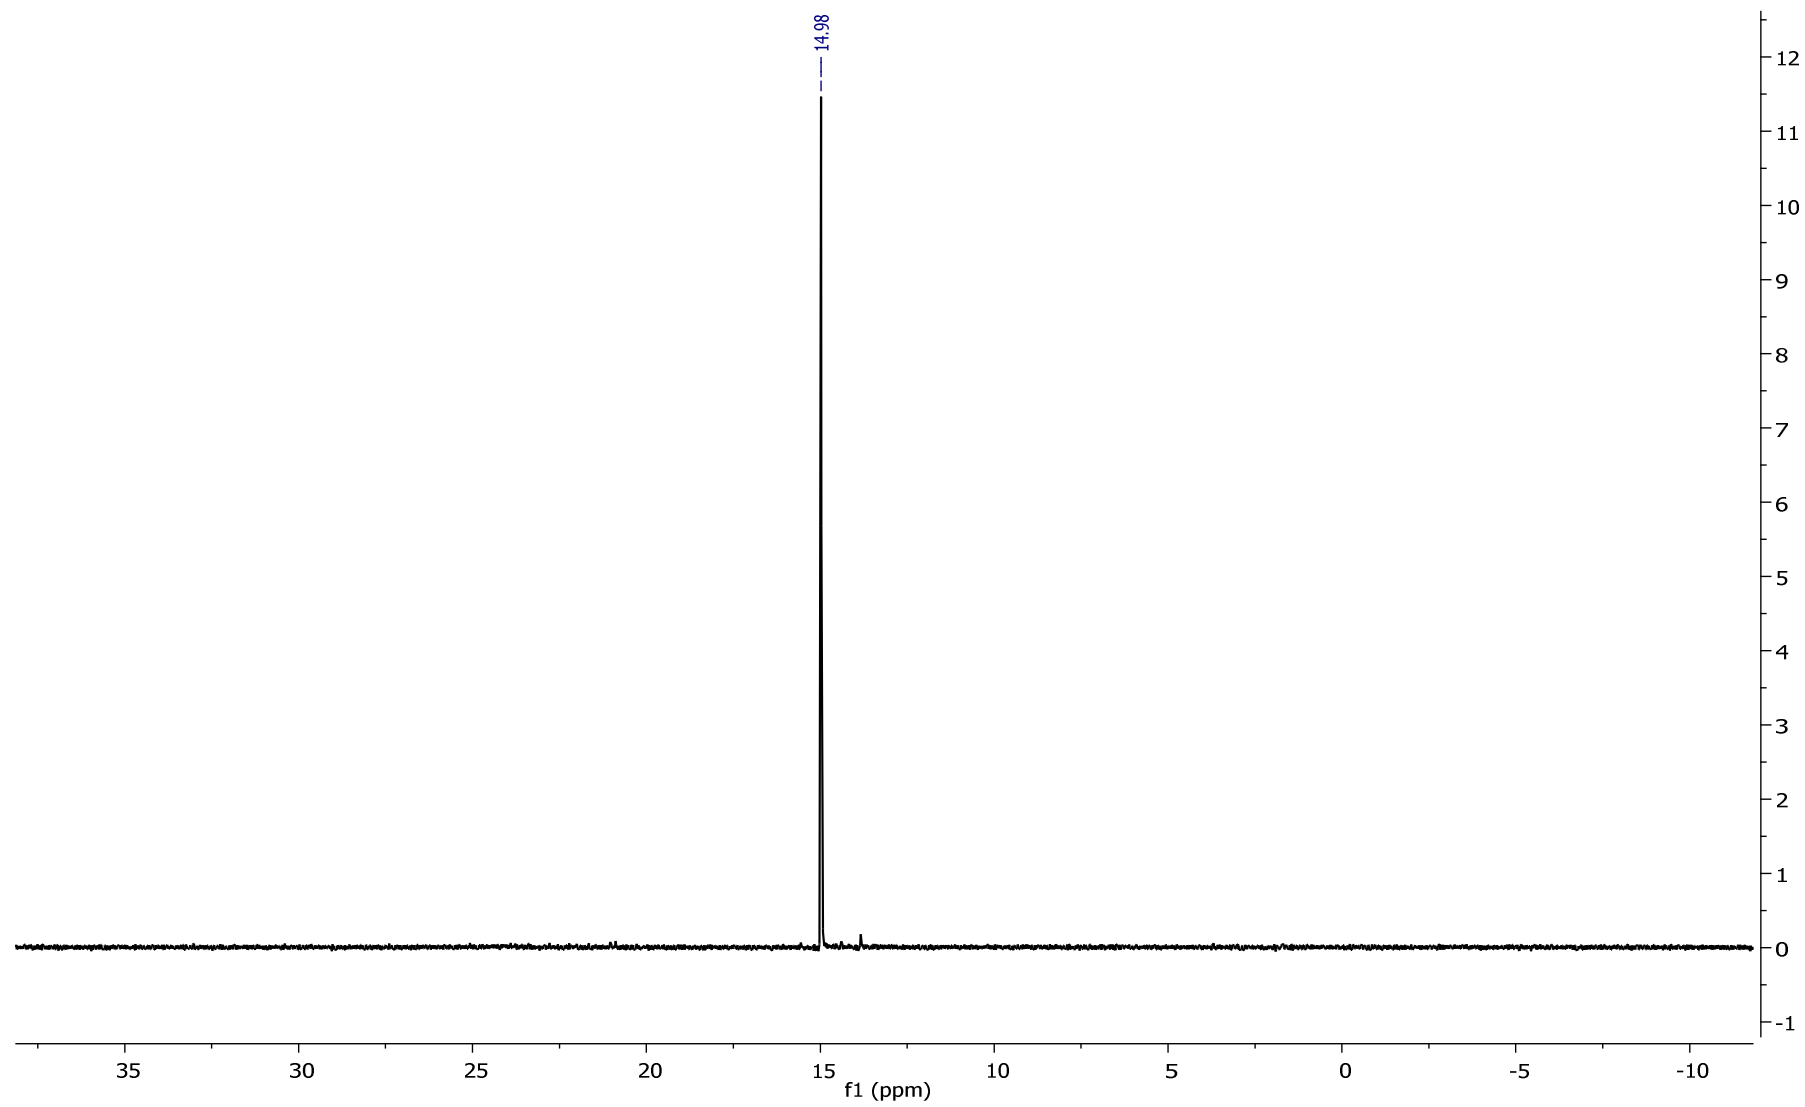

$^{13}\text{C}$ - $^1\text{H}$  NMR – HETCOR

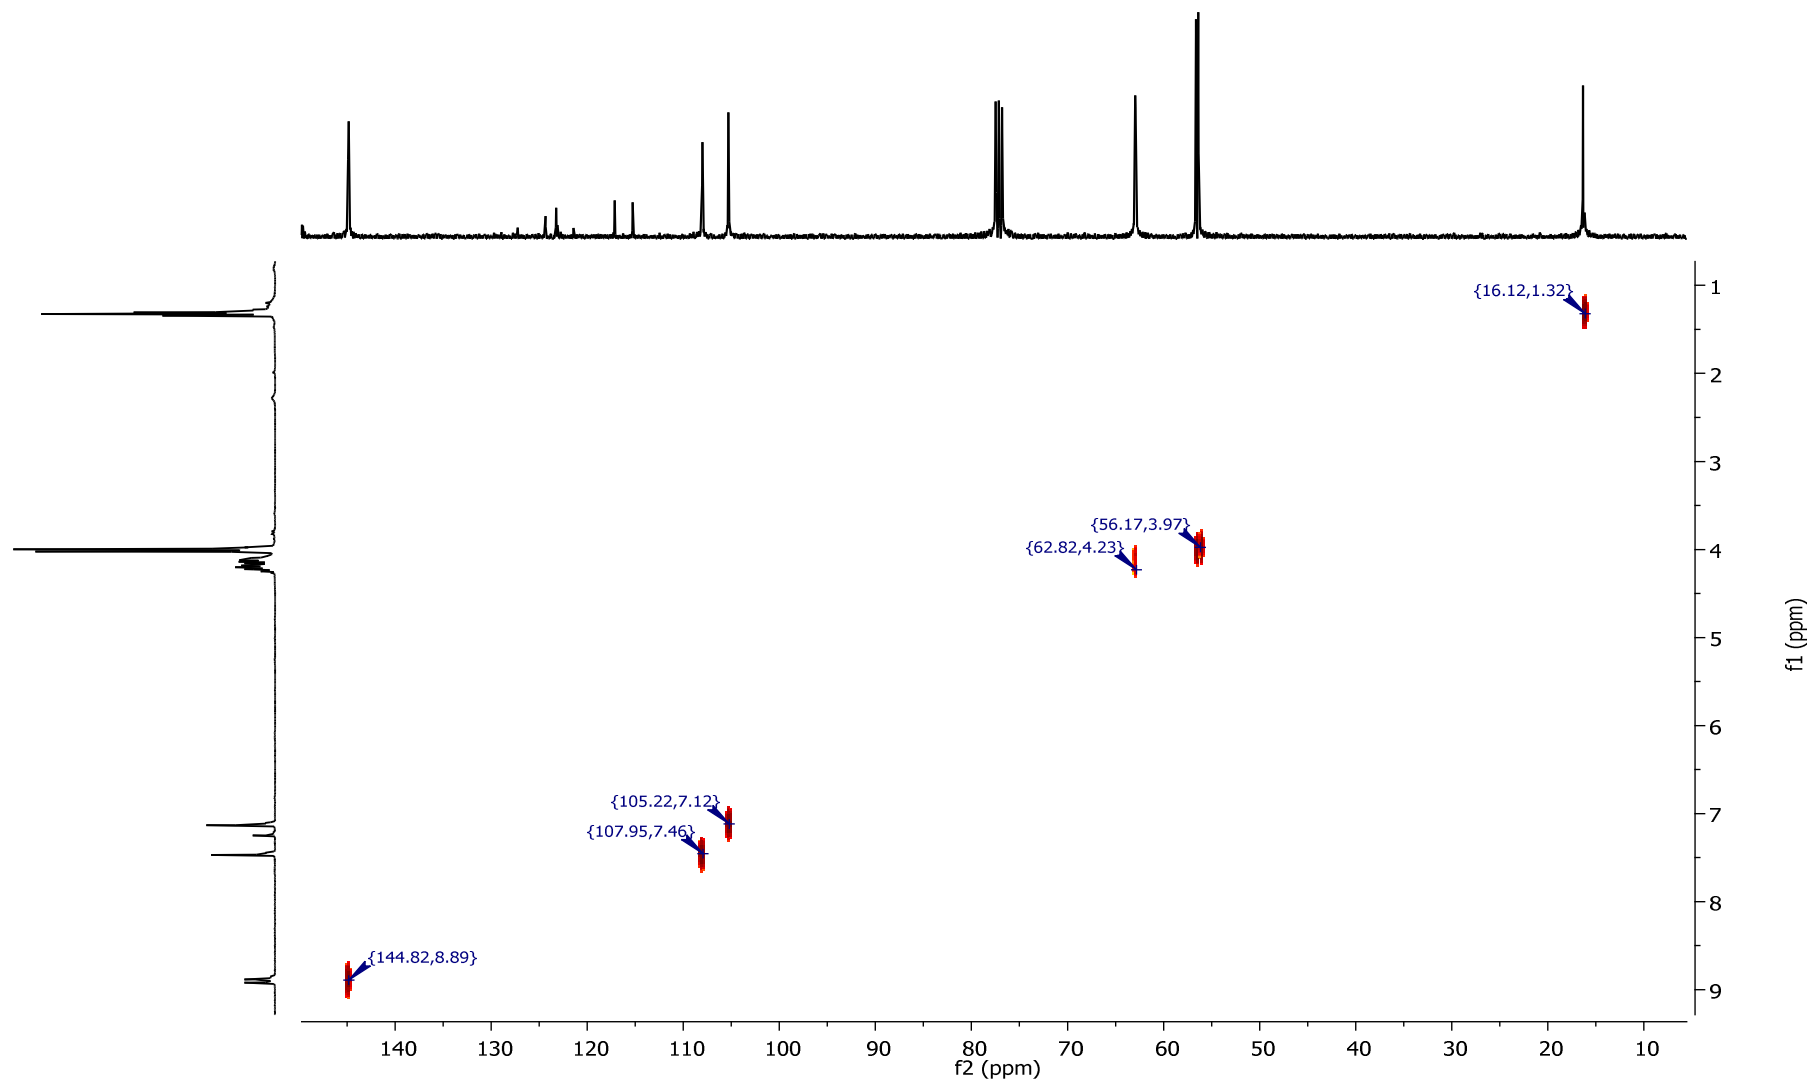



8. Diethyl (2-(chlorodifluoromethyl)-7-(trifluoromethyl)quinolin-3-yl)phosphonate **4h**

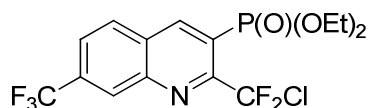

Colourless oil (94%);  $^1\text{H}$  NMR (400 MHz,  $\text{CDCl}_3$ )  $\delta$  1.37 (t,  $J = 7.1$  Hz, 6H), 4.18 (m, 2H), 4.28 (m, 2H), 7.90 (dd,  $J = 8.5$  Hz,  $J = 1.6$  Hz, 1H), 8.12 (d,  $J = 8.5$  Hz, 1H), 8.55 (q,  $^4J_{\text{H-F}} = 0.9$  Hz, 1H), 9.24 (d,  $^3J_{\text{H-P}} = 16.3$  Hz, 1H);  $^{13}\text{C}$  NMR (100 MHz)  $\delta$  16.3 (d,  $J = 6.5$  Hz), 63.4 (d,  $J = 6.2$  Hz), 121.2 (d,  $^1J_{\text{C-P}} = 184.4$  Hz), 123.4 (q,  $^1J_{\text{C-F}} = 274.3$  Hz), 123.8 (td,  $^1J_{\text{C-F}} = 293.2$  Hz,  $^3J_{\text{C-P}} = 1.1$  Hz), 125.2 (qd,  $^4J_{\text{C-F}} = 3.2$  Hz,  $^4J_{\text{C-P}} = 1.2$  Hz), 127.7 (qd,  $^4J_{\text{C-F}} = 4.3$  Hz,  $^4J_{\text{C-P}} = 1.4$  Hz), 128.3 (d,  $^3J_{\text{C-P}} = 11.6$  Hz), 129.8, 134.5 (q,  $^2J_{\text{C-F}} = 33.4$  Hz), 146.3, 147.8 (d,  $^2J_{\text{C-P}} = 6.9$  Hz), 152.8 (td,  $^2J_{\text{C-F}} = 30.6$  Hz,  $^2J_{\text{C-P}} = 8.2$  Hz);  $^{19}\text{F}$  NMR (376 MHz)  $\delta$  -52.4 (s, - $\text{CF}_2\text{Cl}$ ), -63.0 (s, - $\text{CF}_3$ );  $^{31}\text{P}$  NMR (161 MHz)  $\delta$  12.9; HRMS (ESI): calcd for  $\text{C}_{15}\text{H}_{14}\text{ClF}_5\text{NNaO}_3\text{P}$   $[\text{M}+\text{Na}]^+$  440.0212, found 440.0217.

<sup>1</sup>H NMR

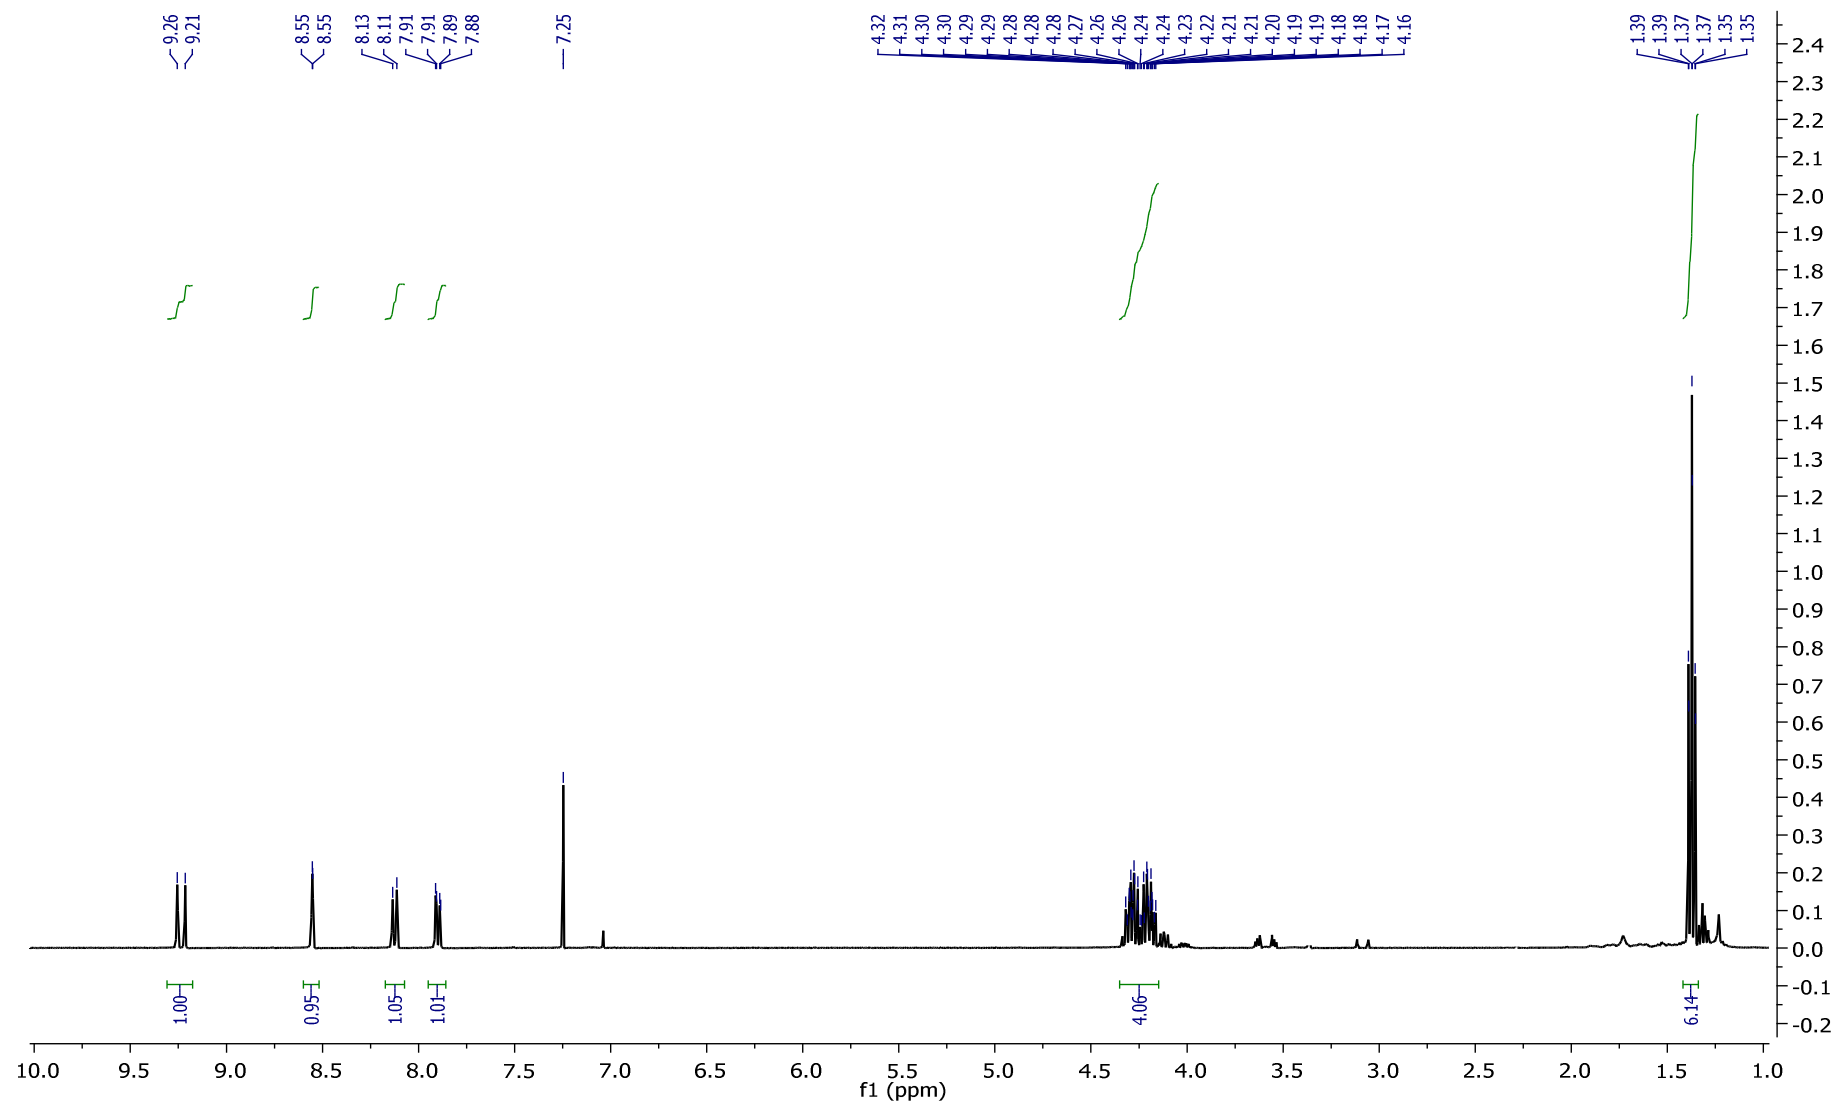

# <sup>13</sup>C NMR

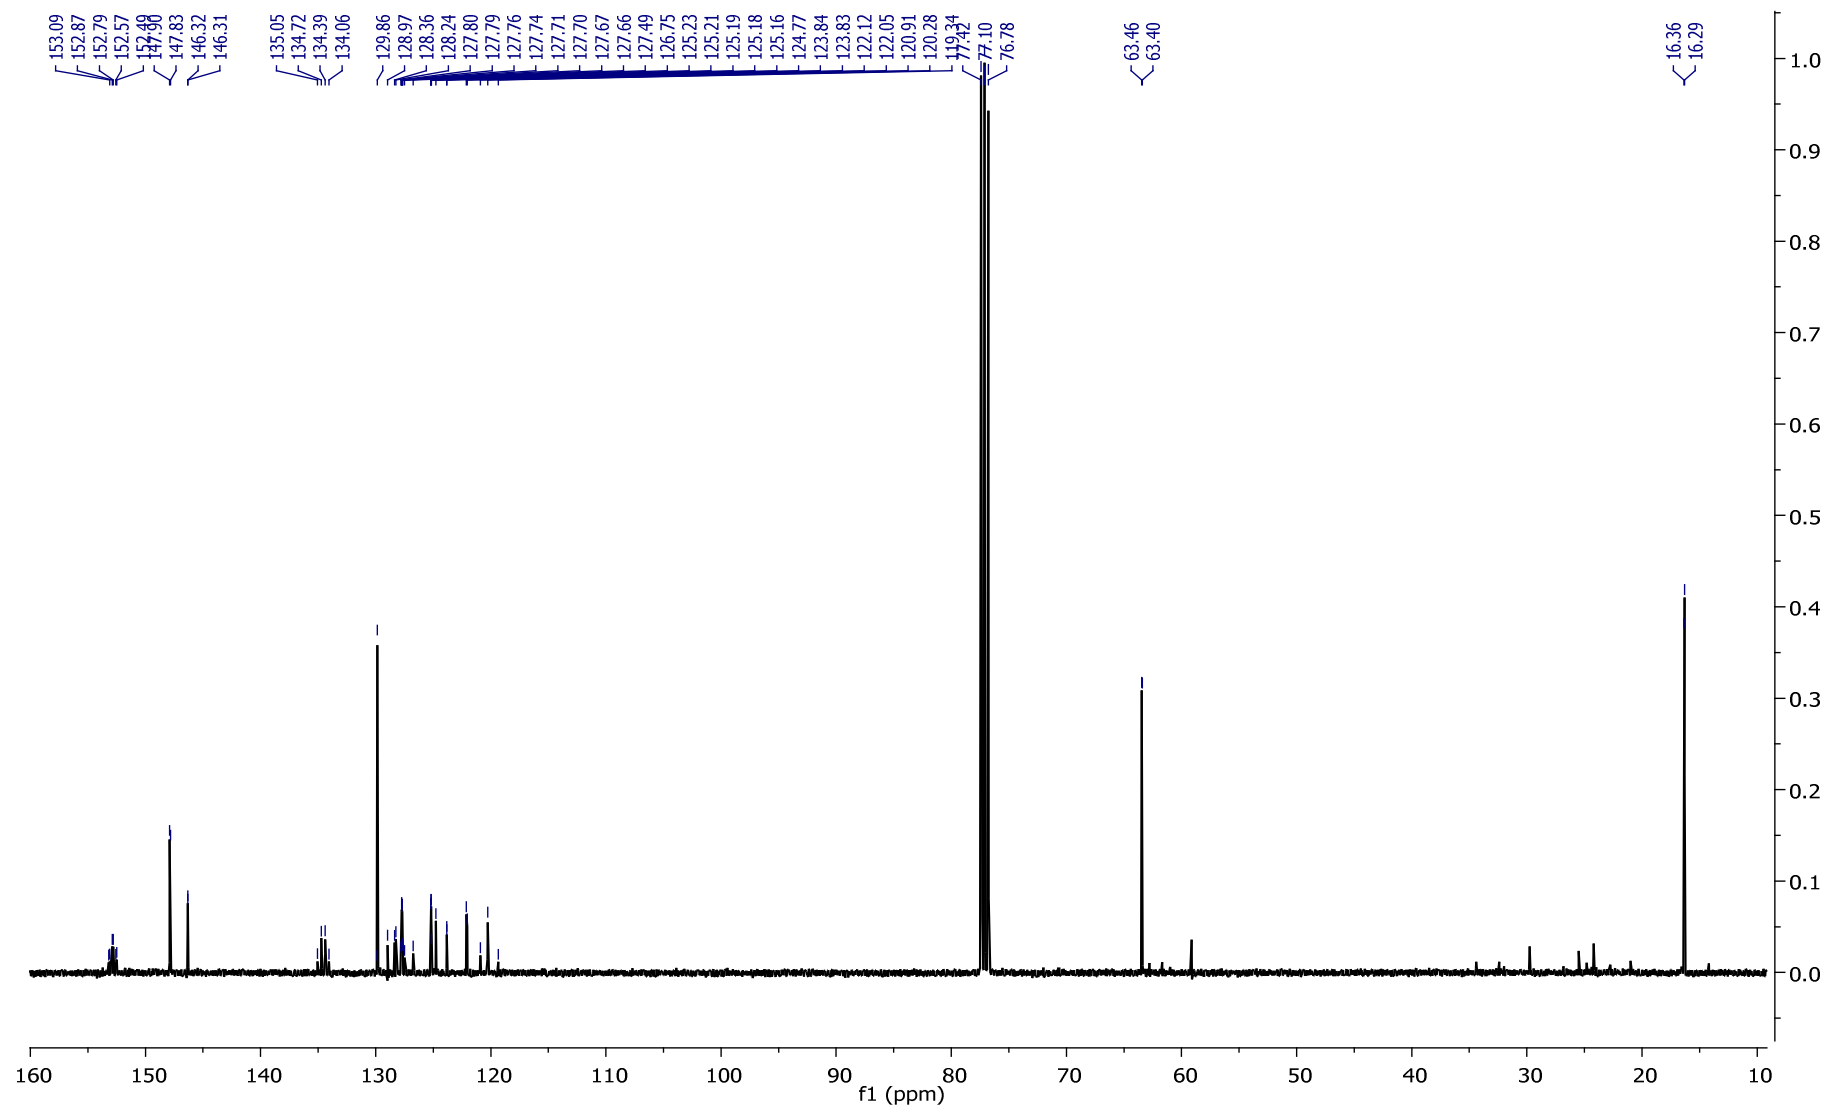

$^{19}\text{F}$  NMR

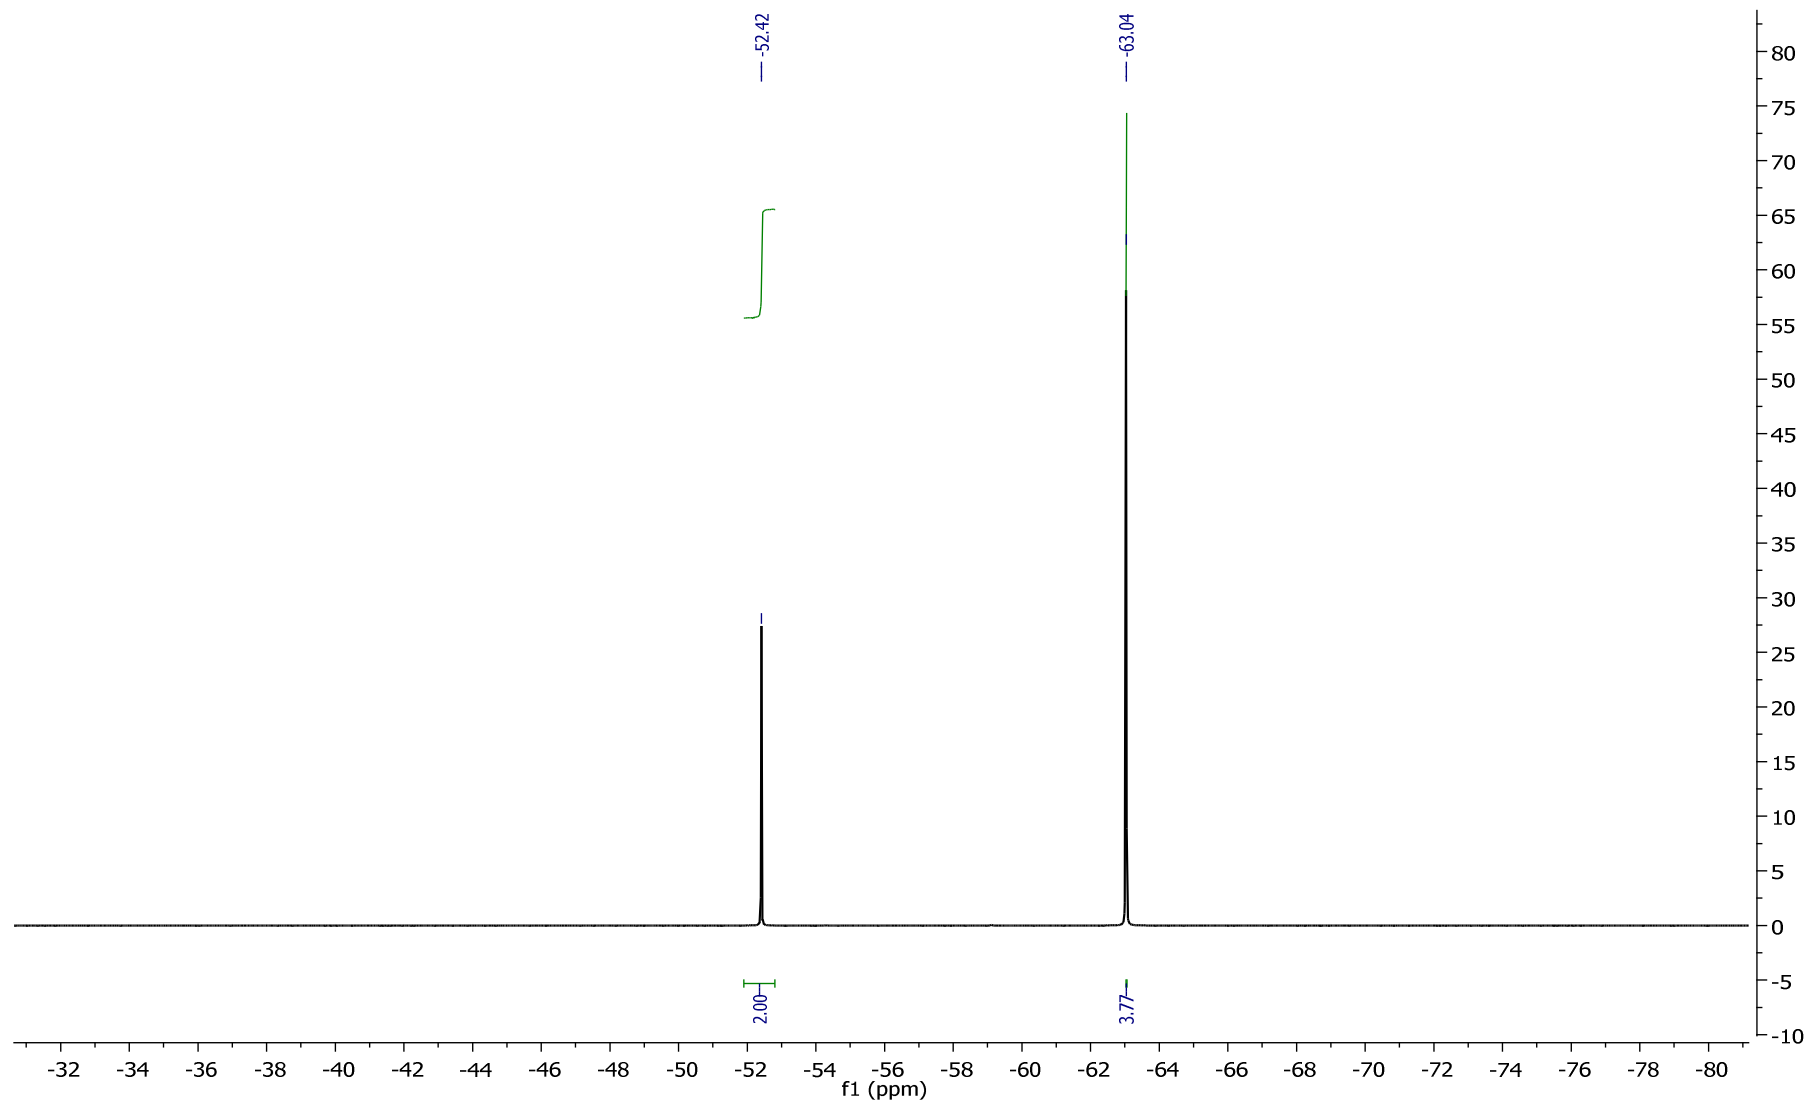

$^{31}\text{P}$  NMR

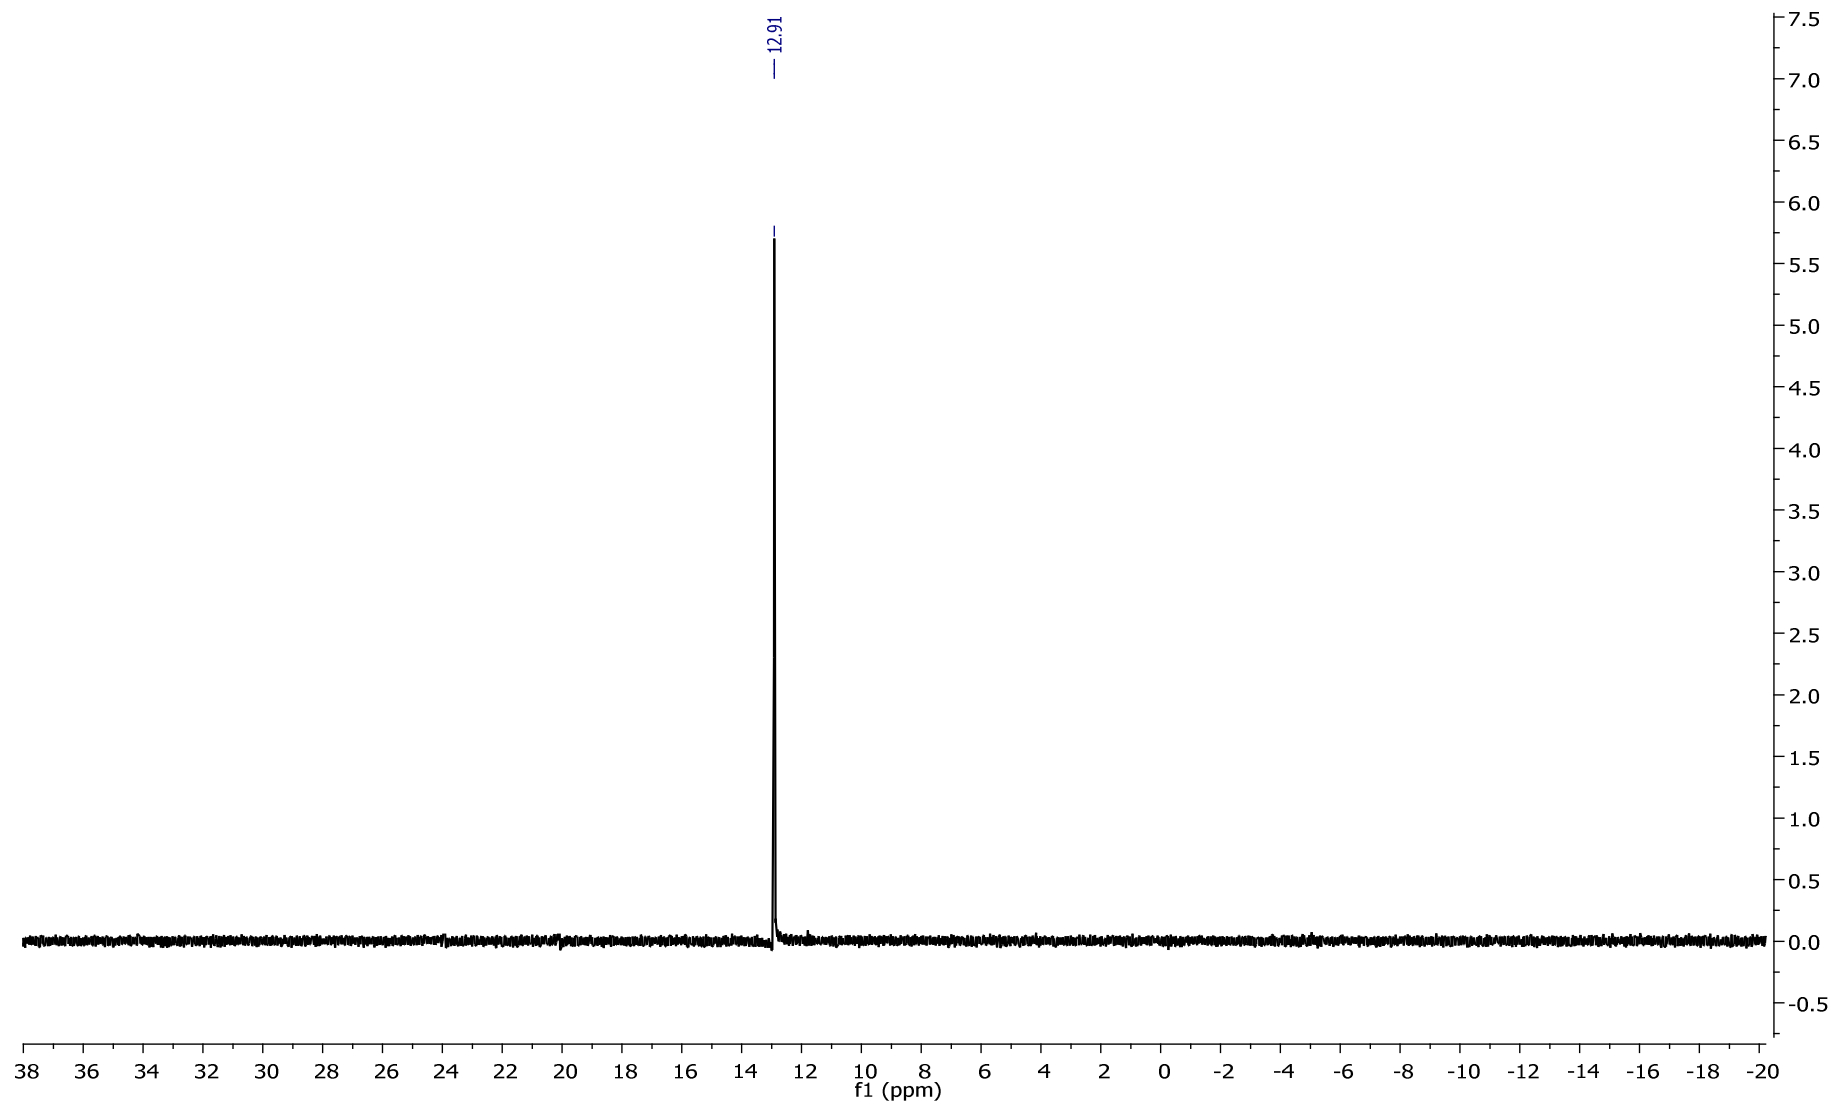

9. Diethyl (2-(bromodifluoromethyl)quinolin-3-yl)phosphonate **4i**

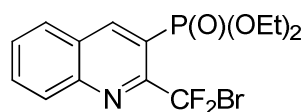

Brownish oil (88%);  $^1\text{H}$  NMR (400 MHz,  $\text{CDCl}_3$ )  $\delta$  1.34 (t,  $J = 7.2$  Hz, 6H), 4.15 (m, 2H), 4.23 (m, 2H), 7.67 (td,  $J = 7.9$  Hz,  $J = 0.9$  Hz, 1H), 7.85 (td,  $J = 6.9$  Hz,  $J = 1.4$  Hz, 1H), 7.92 (d,  $J = 8.1$  Hz, 1H), 8.16 (d,  $J = 8.3$  Hz, 1H), 9.09 (d,  $^3J_{\text{H-P}} = 16.4$  Hz, 1H);  $^{13}\text{C}$  NMR (100 MHz)  $\delta$  16.3 (d,  $J = 6.2$  Hz), 63.1 (d,  $J = 6.2$  Hz), 116.5 (td,  $^1J_{\text{C-F}} = 306.9$  Hz,  $^3J_{\text{C-P}} = 1.4$  Hz), 118.5 (d,  $^1J_{\text{C-P}} = 186.2$  Hz), 126.8 (d,  $^3J_{\text{C-P}} = 11.5$  Hz), 128.5, 129.5 (d,  $^5J_{\text{C-P}} = 1.0$  Hz), 129.8 (d,  $^4J_{\text{C-P}} = 1.5$  Hz), 133.0, 147.2 (dt,  $^4J_{\text{C-P}} = 1.4$  Hz,  $^4J_{\text{C-F}} = 0.9$  Hz), 147.8 (d,  $^2J_{\text{C-P}} = 6.7$  Hz), 152.5 (td,  $^2J_{\text{C-F}} = 26.8$  Hz,  $^2J_{\text{C-P}} = 8.3$  Hz);  $^{19}\text{F}$  NMR (376 MHz)  $\delta$  -47.5;  $^{31}\text{P}$  NMR (161 MHz)  $\delta$  14.0 (t,  $^4J_{\text{P-F}} = 0.9$  Hz); HRMS (ESI): calcd for  $\text{C}_{14}\text{H}_{16}\text{BrF}_2\text{NO}_3\text{P}$   $[\text{M}+\text{H}]^+$  394.0014, found 394.0017.

# <sup>1</sup>H NMR

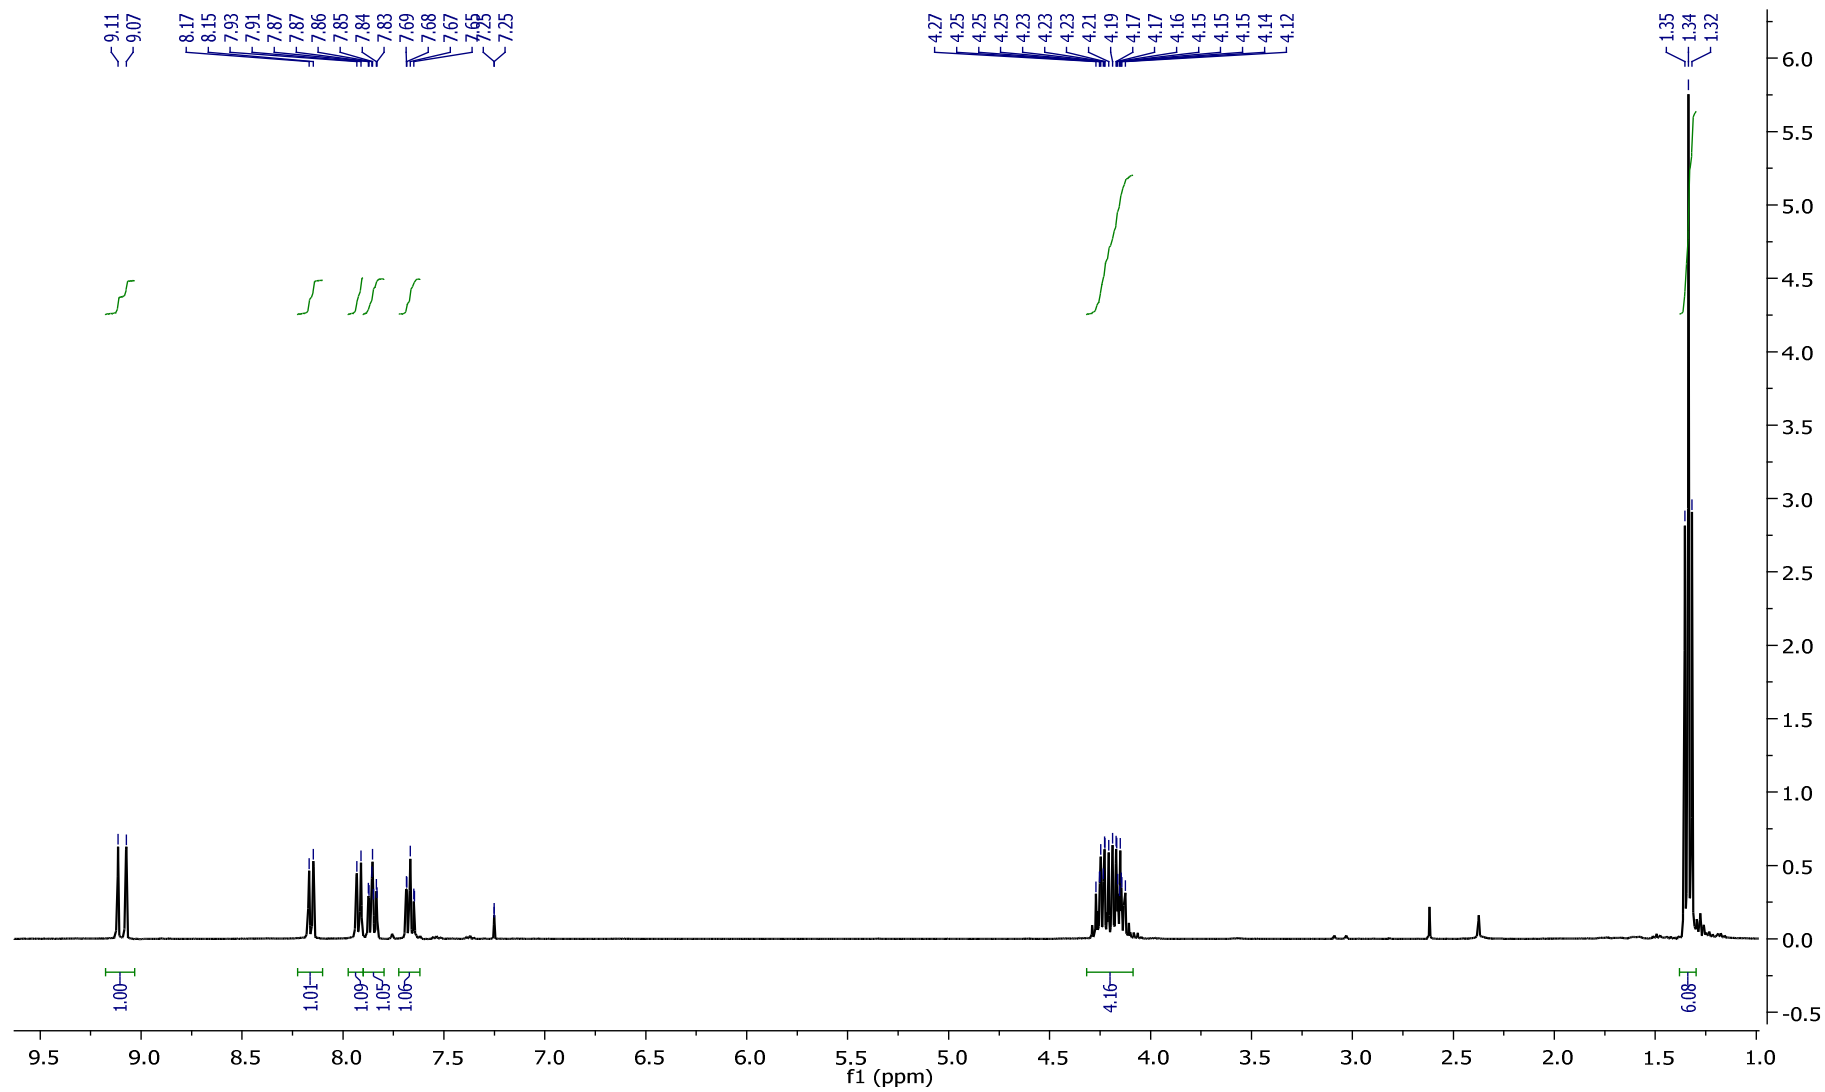

$^{13}\text{C}$  NMR

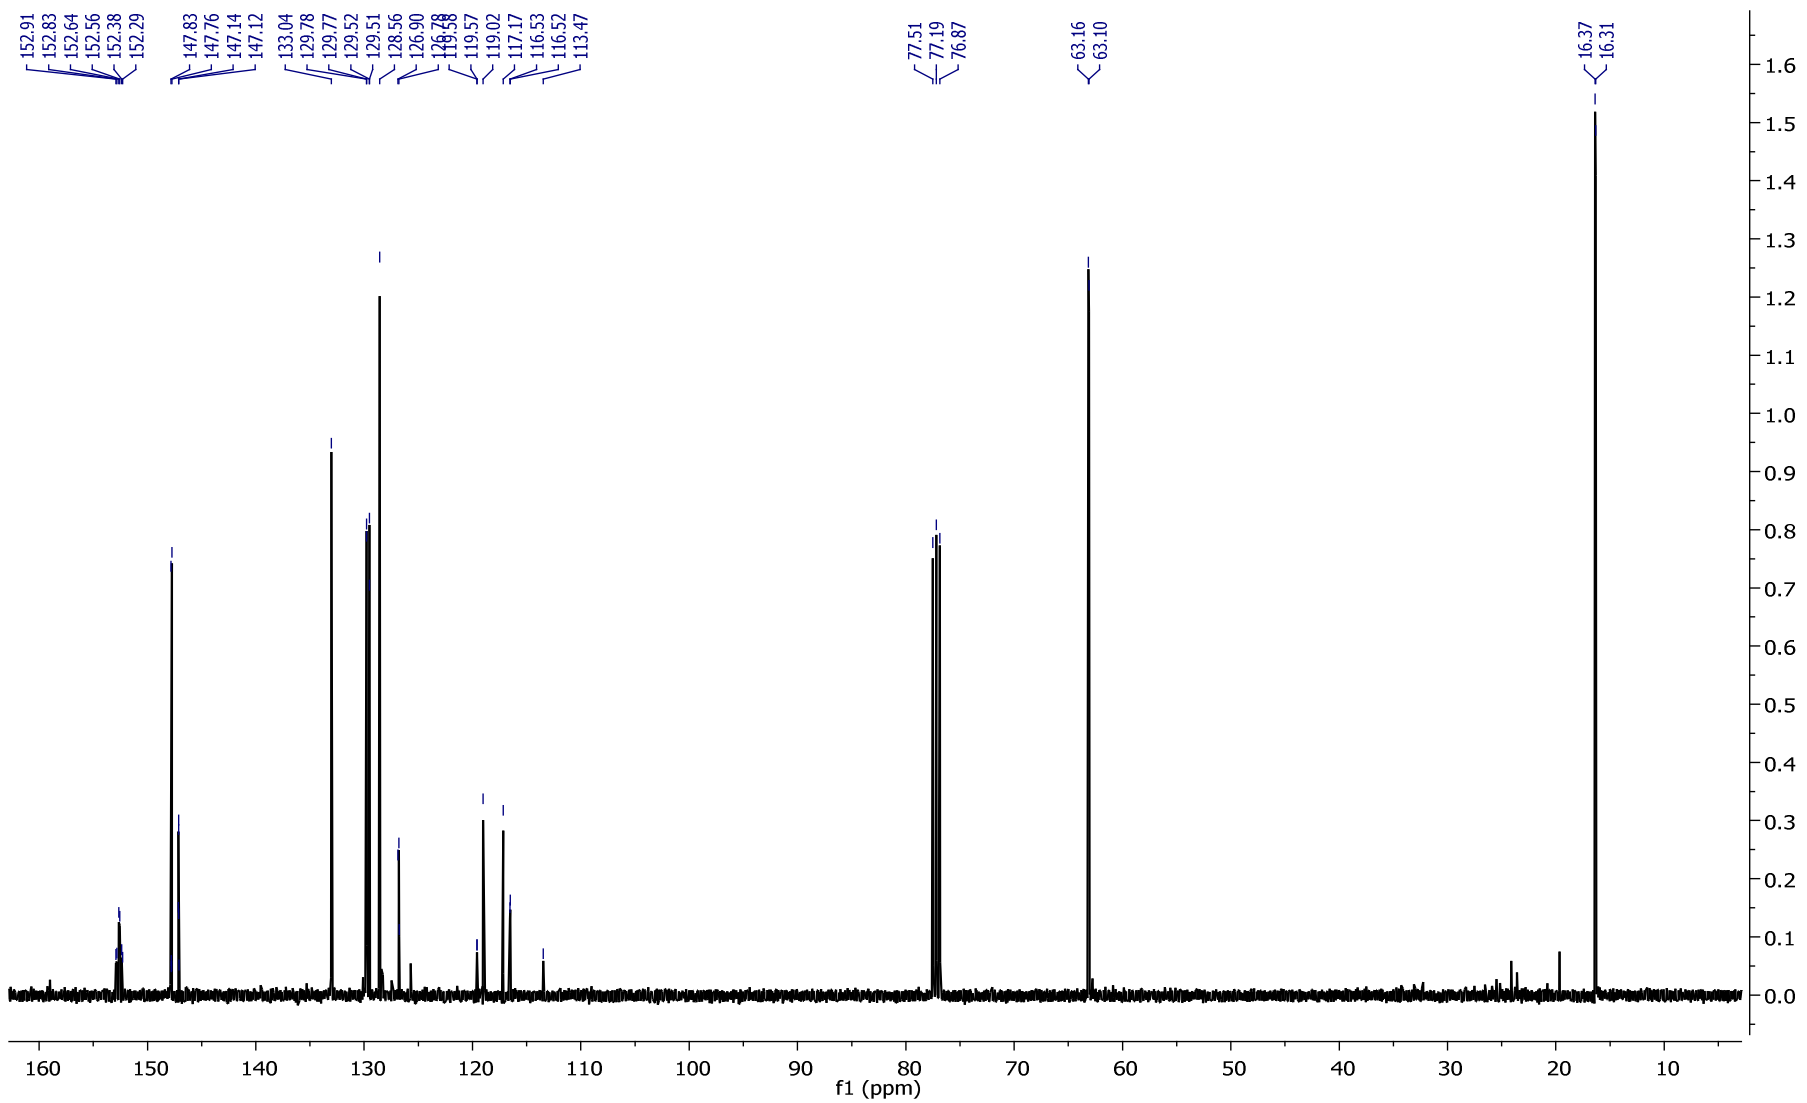



$^{19}\text{F}$  NMR

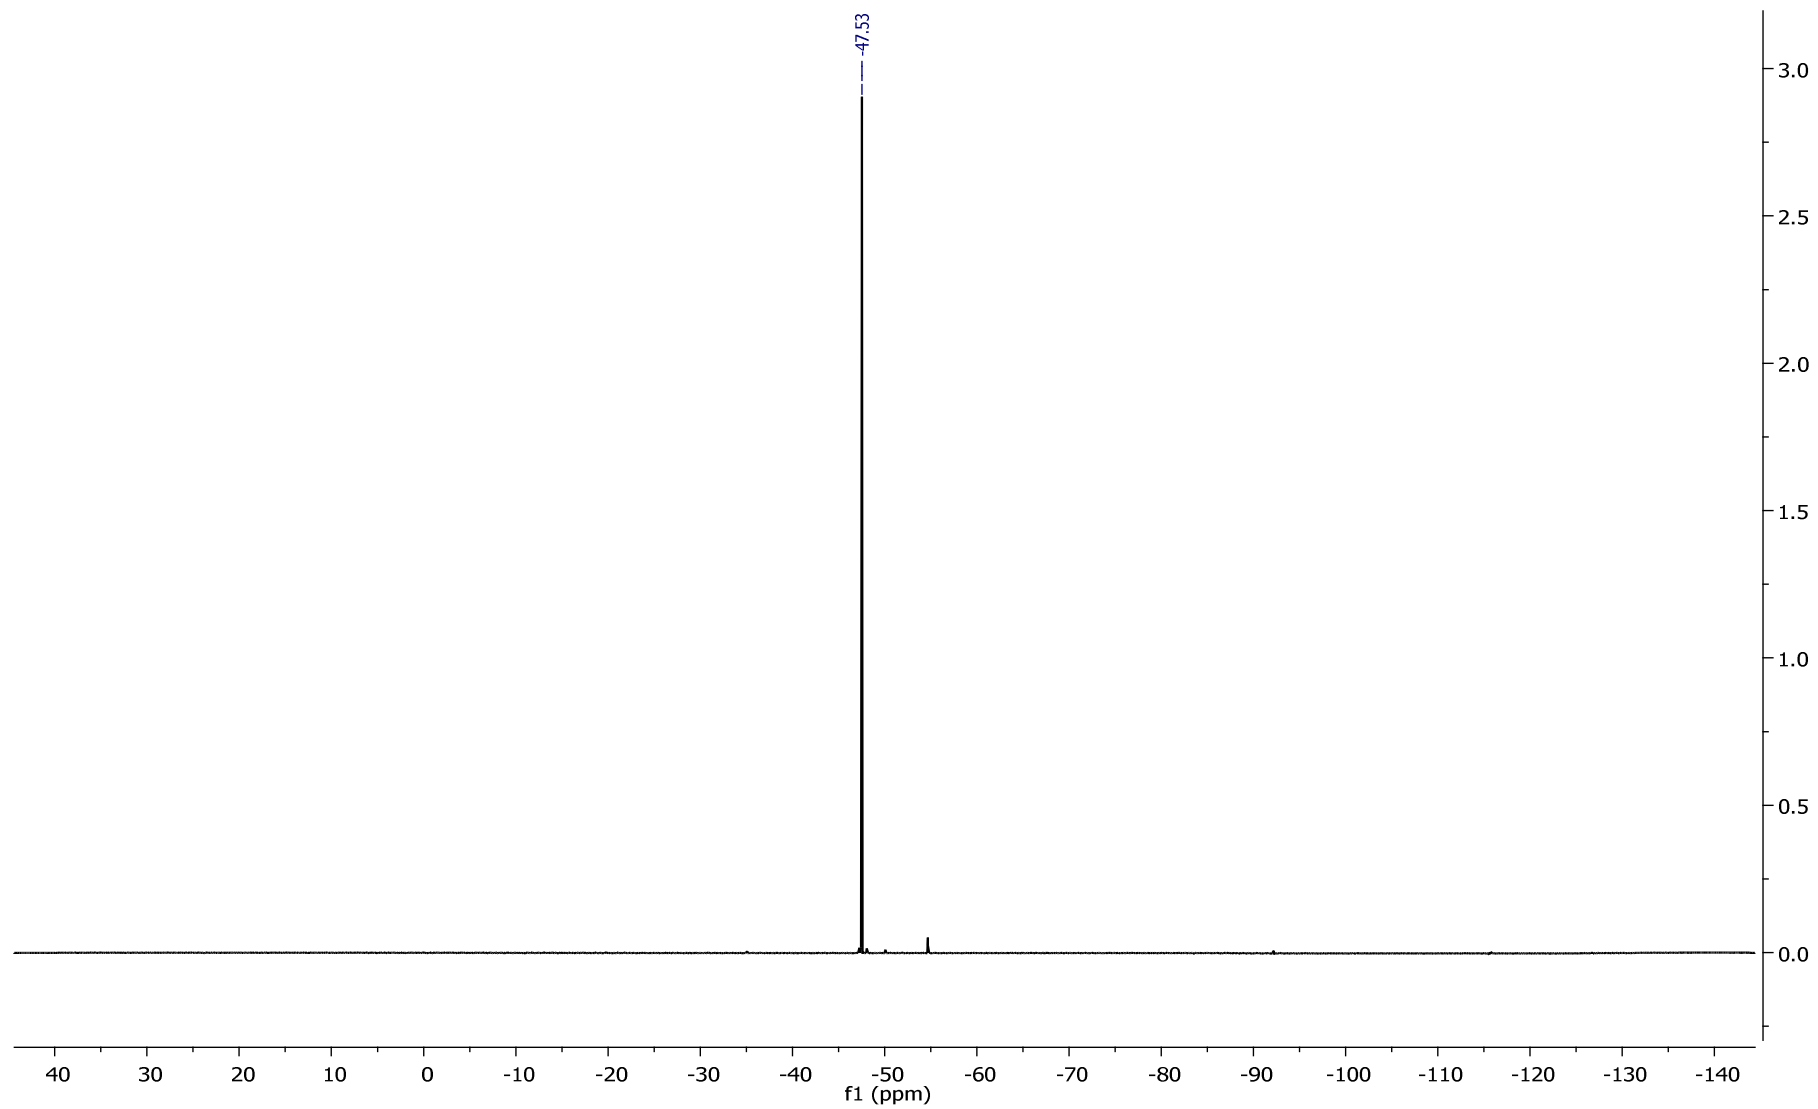

$^{31}\text{P}$  NMR

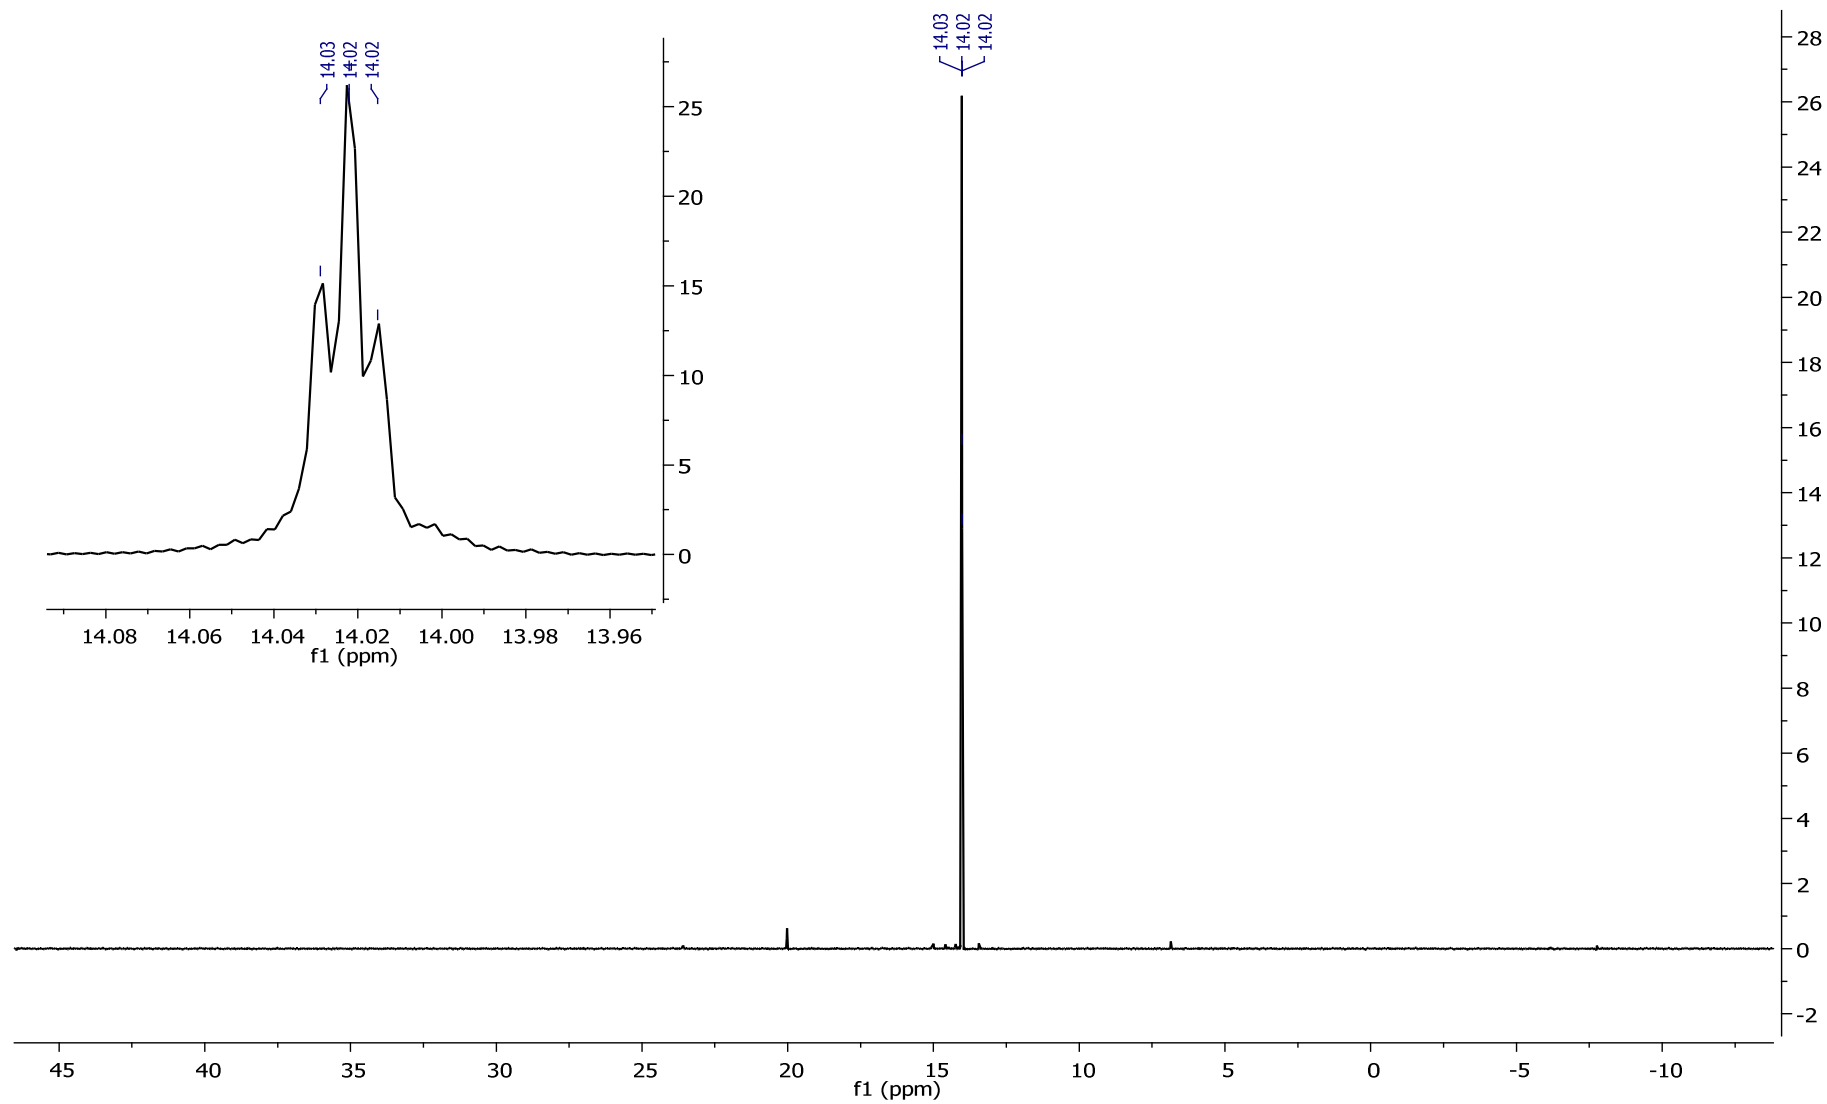

10. Diethyl (2-(bromodifluoromethyl)-6-chloroquinolin-3-yl)phosphonate **4j**

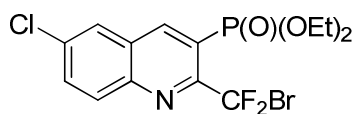

Orange crystals (80%); Mp = 118–121 °C;  $^1\text{H}$  NMR (400 MHz,  $\text{CDCl}_3$ )  $\delta$  1.37 (t,  $J = 7.0$  Hz, 6H), 4.17 (m, 2H), 4.26 (m, 2H), 7.82 (dd,  $J = 8.9$  Hz,  $J = 2.2$  Hz, 1H), 7.94 (d,  $J = 2.2$  Hz, 1H), 8.15 (d,  $J = 9.0$  Hz, 1H), 9.04 (d,  $^3J_{\text{H-P}} = 16.3$  Hz, 1H);  $^{13}\text{C}$  NMR (100 MHz)  $\delta$  16.4 (d,  $J = 6.6$  Hz), 63.3 (d,  $J = 6.2$  Hz), 116.3 (td,  $^1J_{\text{C-F}} = 308.9$  Hz,  $^3J_{\text{C-P}} = 0.9$  Hz), 119.8 (d,  $^1J_{\text{C-P}} = 185.6$  Hz), 127.1, 127.5 (d,  $^3J_{\text{C-P}} = 11.9$  Hz), 131.4 (d,  $^4J_{\text{C-P}} = 1.9$  Hz), 134.0, 135.6 (d,  $^5J_{\text{C-P}} = 1.7$  Hz), 145.5, 146.8 (d,  $^2J_{\text{C-P}} = 7.3$  Hz), 152.9 (td,  $^2J_{\text{C-F}} = 27.4$  Hz,  $^2J_{\text{C-P}} = 8.7$  Hz);  $^{19}\text{F}$  NMR (376 MHz)  $\delta$  -47.8;  $^{31}\text{P}$  NMR (161 MHz)  $\delta$  13.3; HRMS (ESI): calcd for  $\text{C}_{14}\text{H}_{14}\text{BrClF}_2\text{NNaO}_3\text{P}$   $[\text{M}+\text{Na}]^+$  449.9443, found 449.9442.

# <sup>1</sup>H NMR

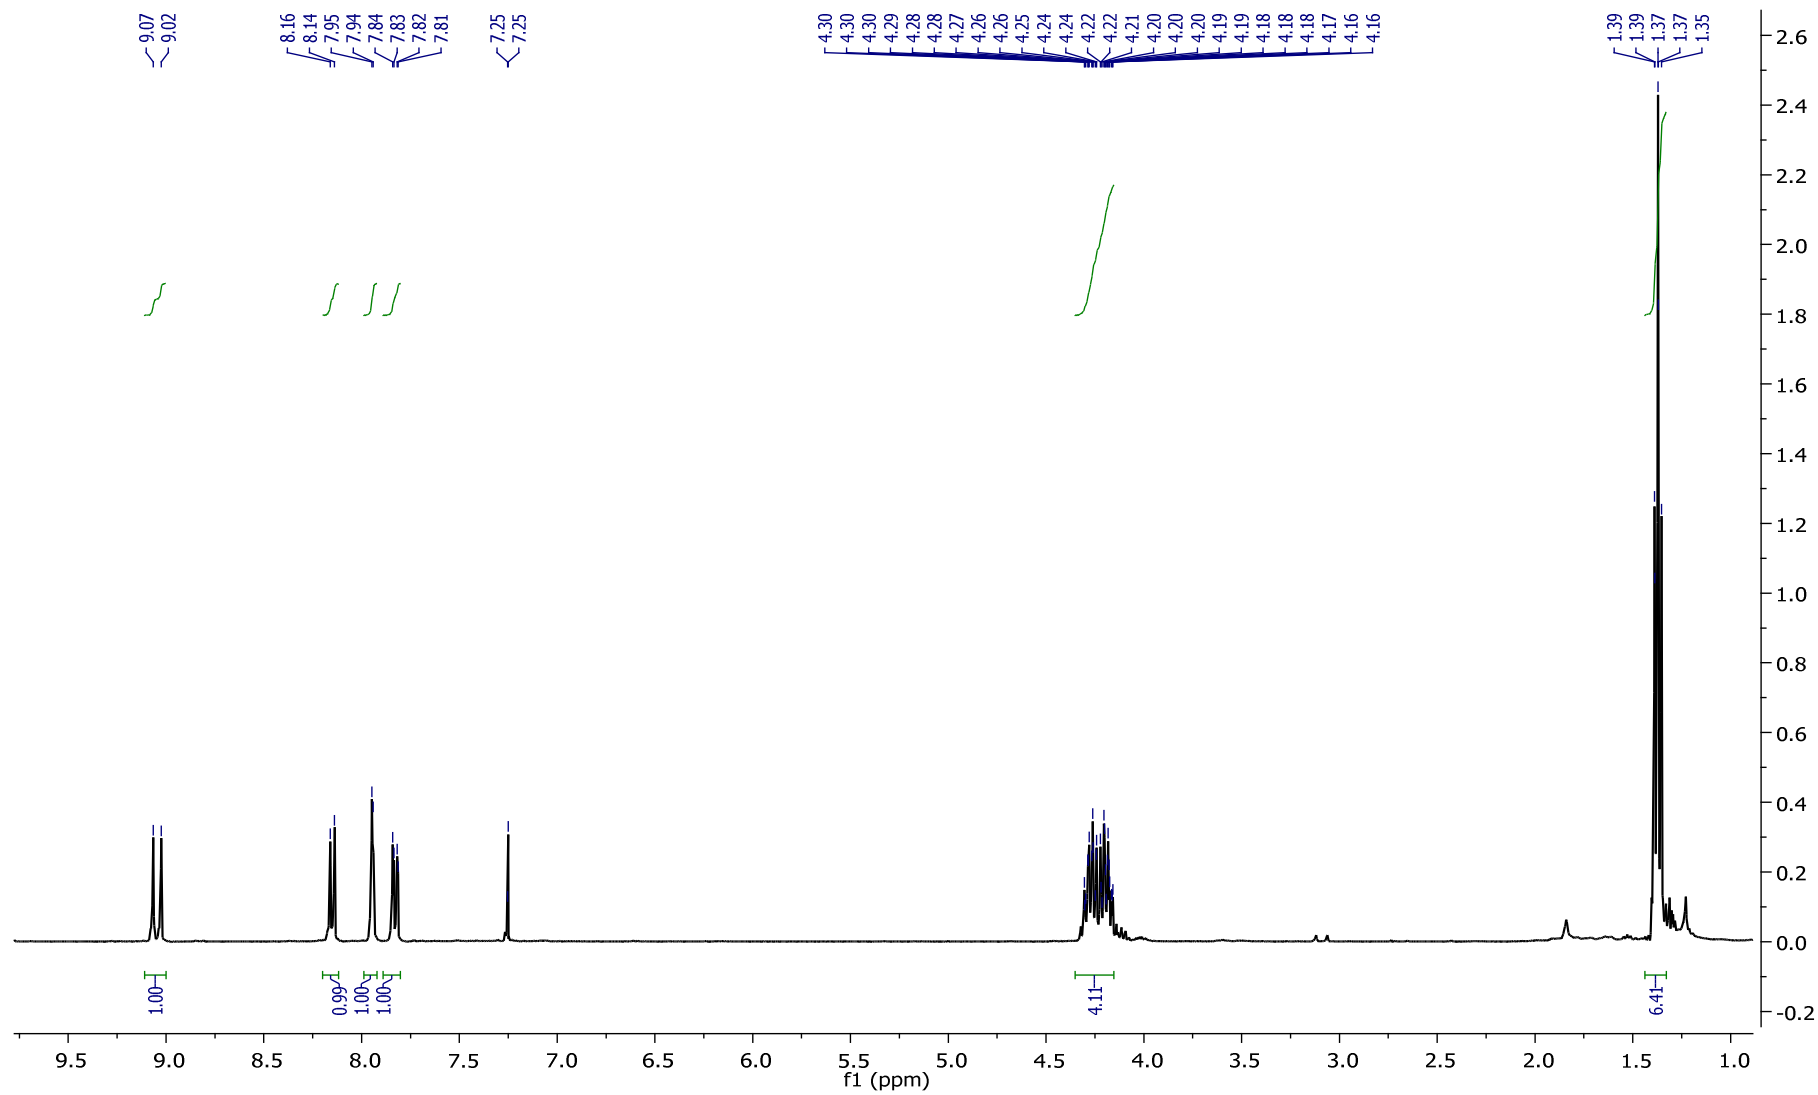

$^{13}\text{C}$  NMR

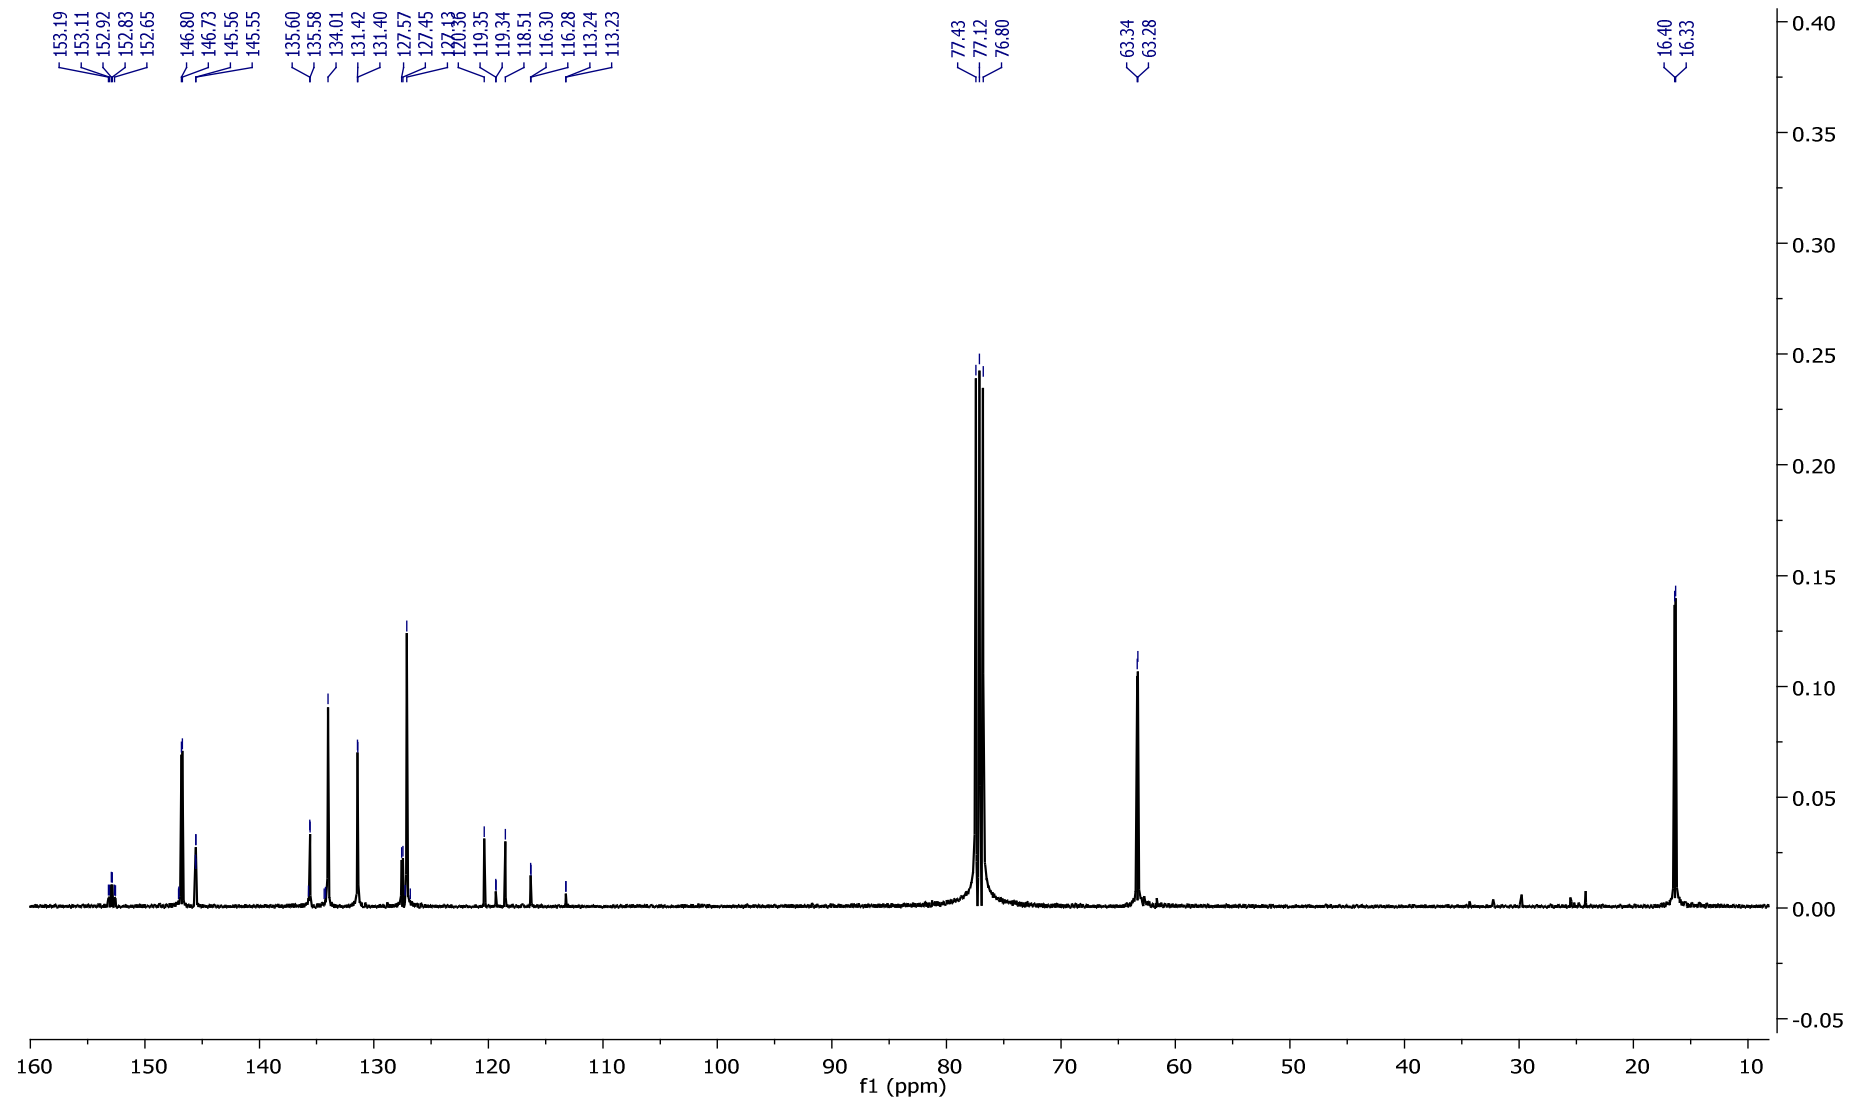

$^{19}\text{F}$  NMR

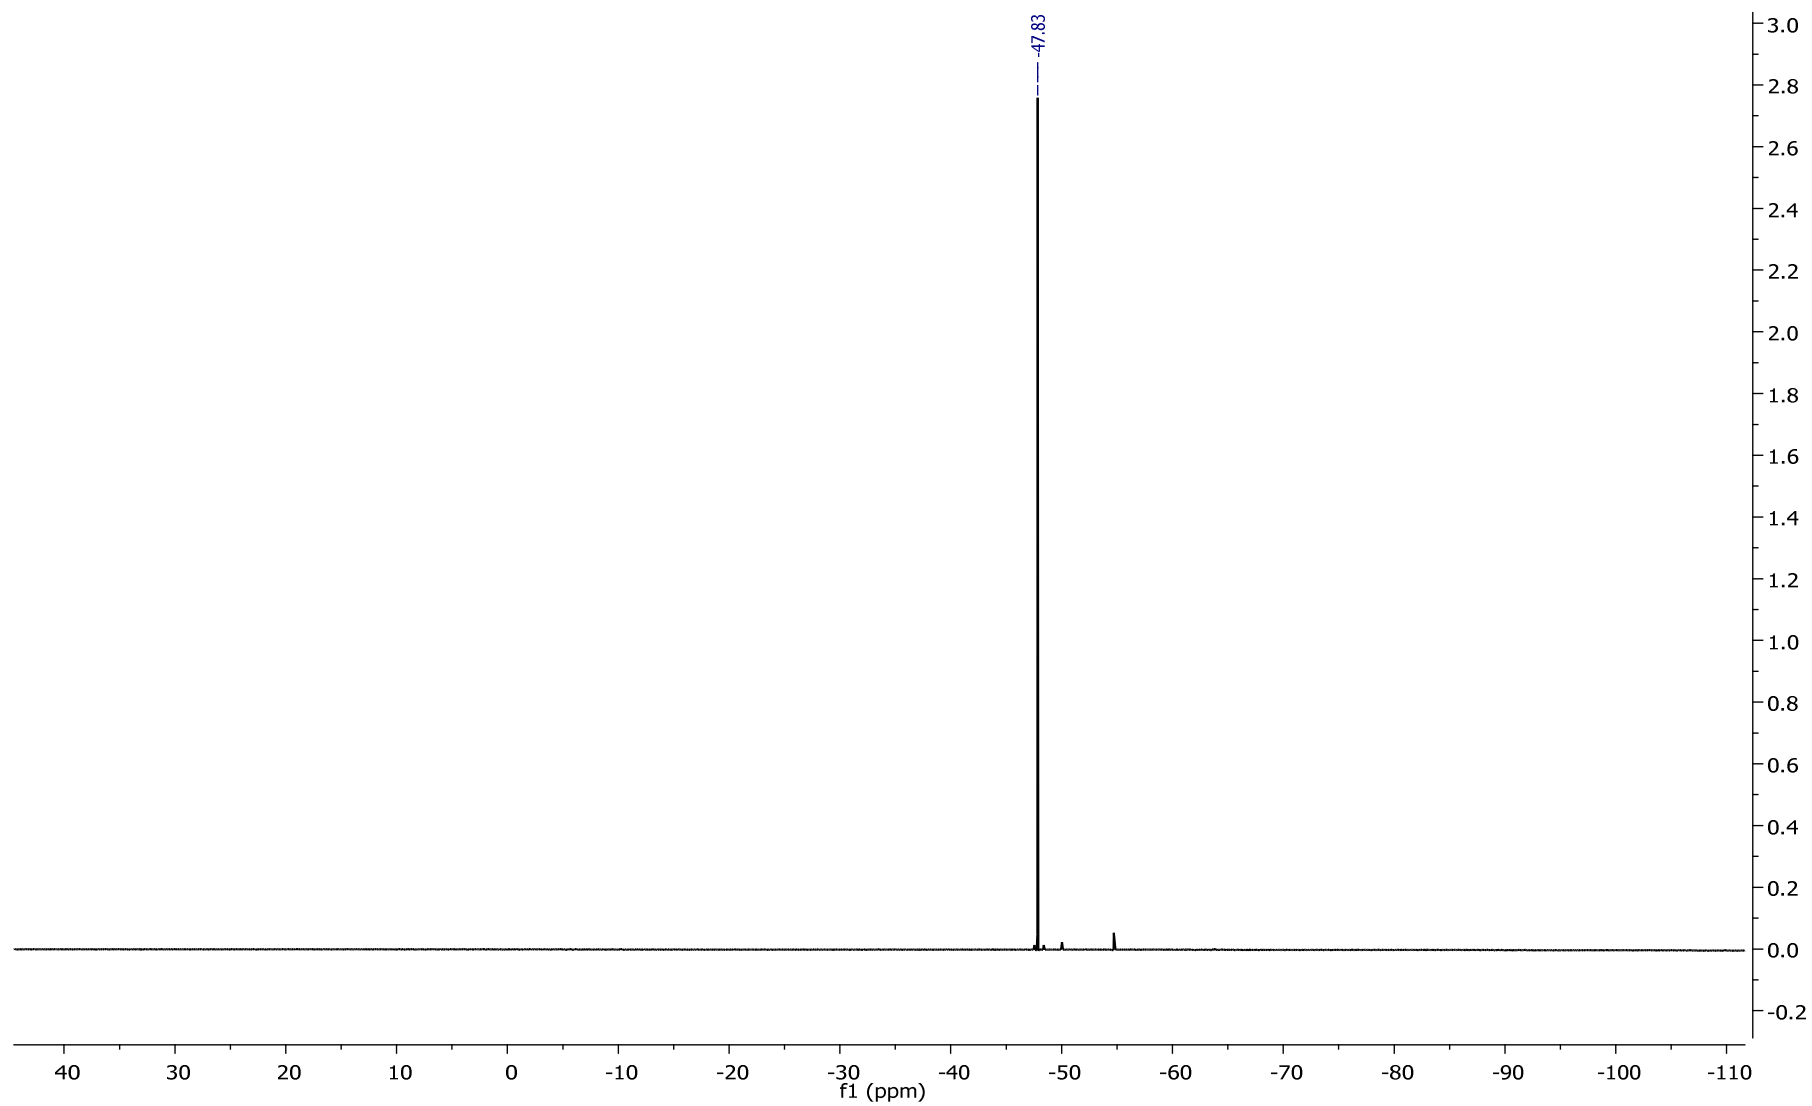

$^{31}\text{P}$  NMR

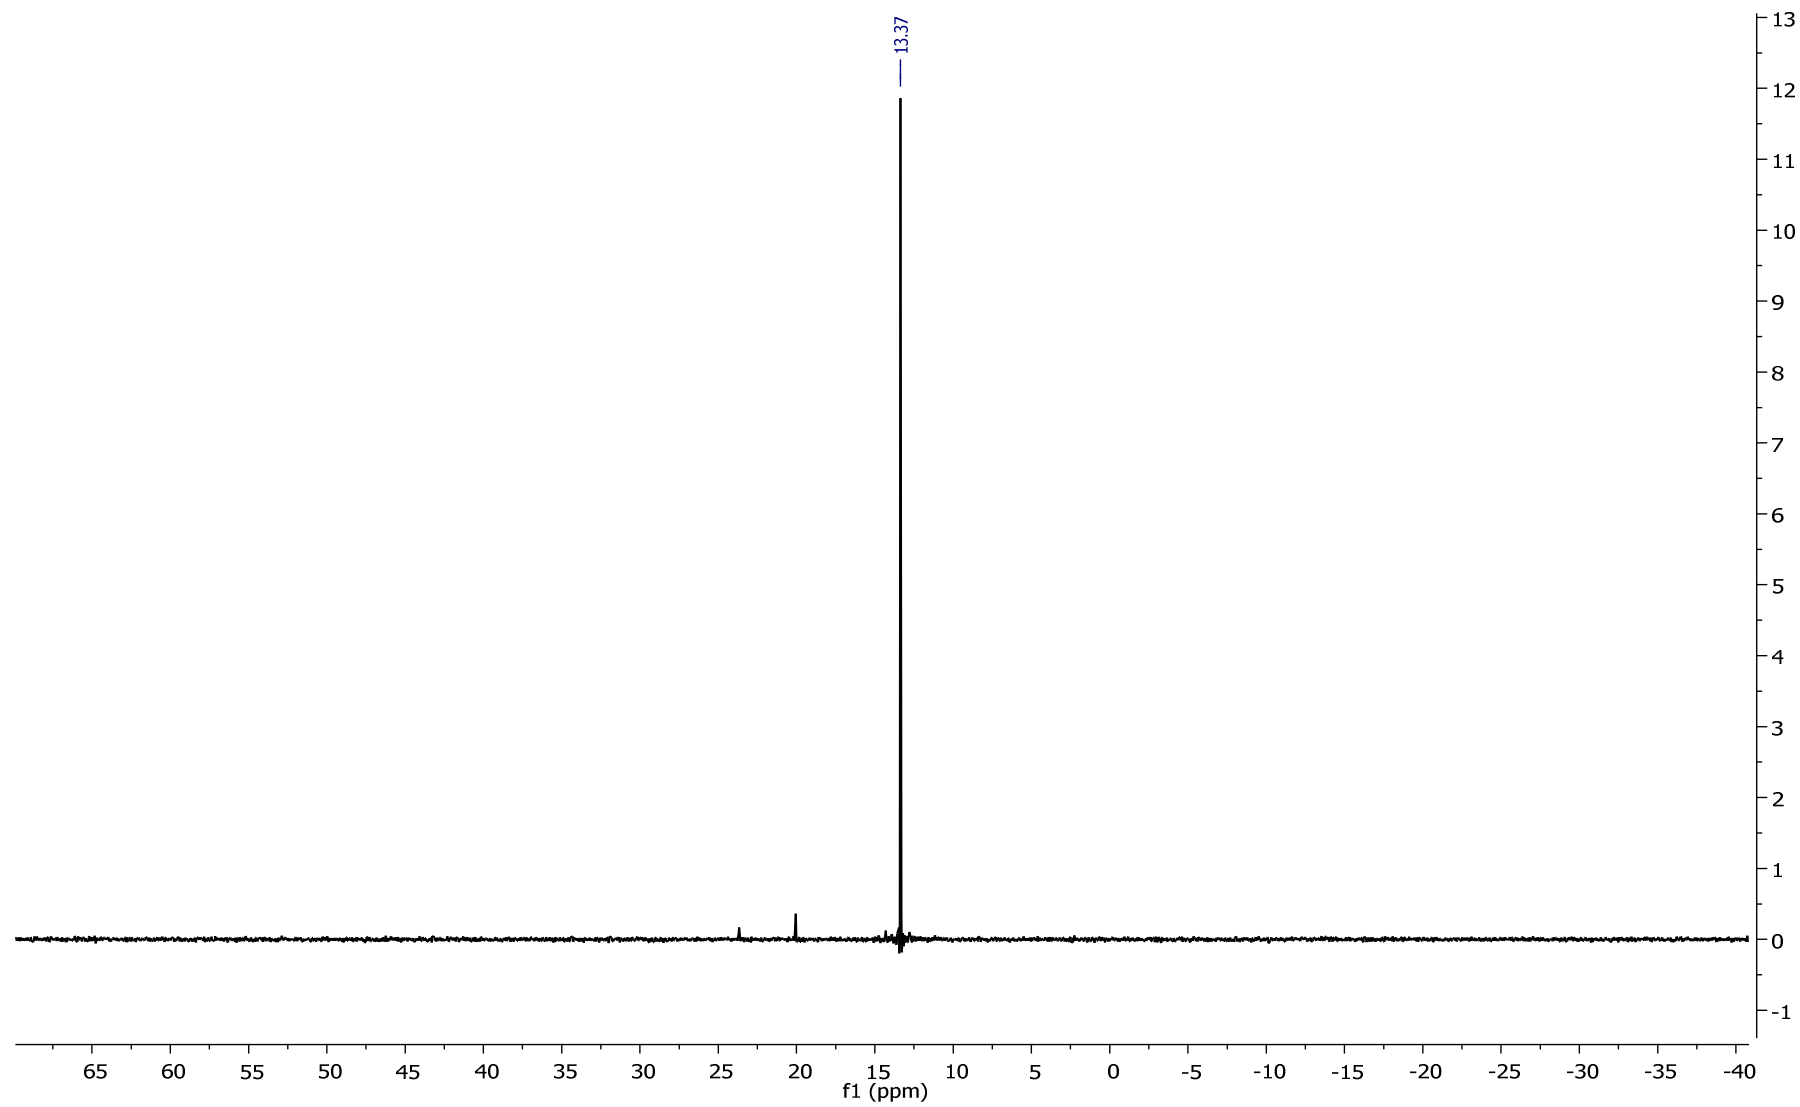

11. Diethyl (2-(bromodifluoromethyl)-6,7-dimethoxyquinolin-3-yl)phosphonate **4k**

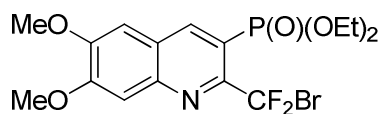

Yellow crystals (71%); Mp = 155–160 °C;  $^1\text{H}$  NMR (400 MHz,  $\text{CDCl}_3$ )  $\delta$  1.32 (t,  $J = 7.1$  Hz, 6H), 3.99 (s, 3H), 4.01 (s, 3H), 4.12 (m, 2H), 4.22 (m, 2H), 7.12 (s, 1H), 7.45 (s, 1H), 8.87 (d,  $^3J_{\text{H-P}} = 16.0$  Hz, 1H);  $^{13}\text{C}$  NMR (100 MHz)  $\delta$  16.3 (d,  $J = 6.6$  Hz), 56.4, 56.6, 62.9 (d,  $J = 6.0$  Hz), 105.3, 107.9, 115.9 (d,  $^1J_{\text{C-P}} = 187.7$  Hz), 116.9 (t,  $^1J_{\text{C-F}} = 306.3$  Hz), 123.1 (d,  $^3J_{\text{C-P}} = 10.7$  Hz), 144.8 (d,  $^2J_{\text{C-P}} = 7.8$  Hz), 150.9 (td,  $^2J_{\text{C-F}} = 26.5$  Hz,  $^2J_{\text{C-P}} = 8.6$  Hz), 152.1, 155.4;  $^{19}\text{F}$  NMR (376 MHz)  $\delta$  -46.8;  $^{31}\text{P}$  NMR (161 MHz)  $\delta$  15.0; HRMS (ESI): calcd for  $\text{C}_{16}\text{H}_{20}\text{BrF}_2\text{NO}_5\text{P}$   $[\text{M}+\text{H}]^+$  454.0225, found 454.0221.



$^1\text{H}$  NMR

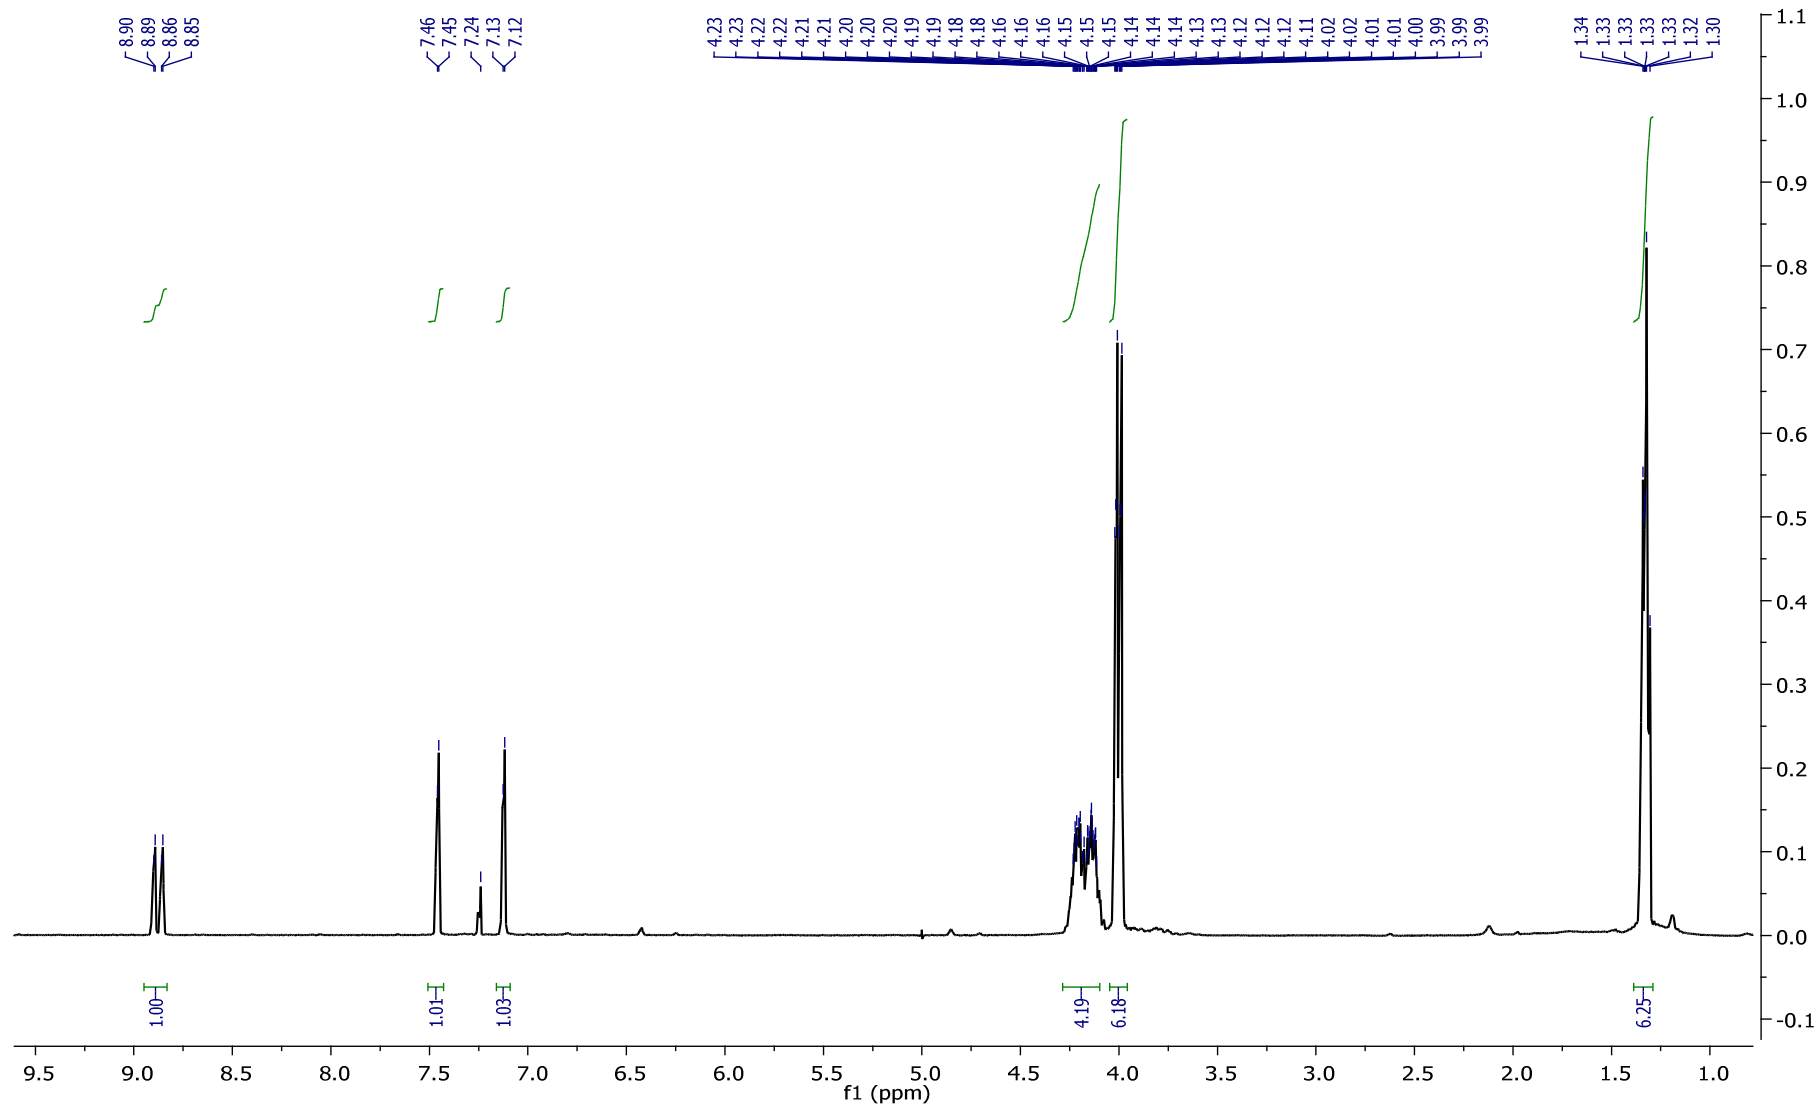

### $^{13}\text{C}$ NMR

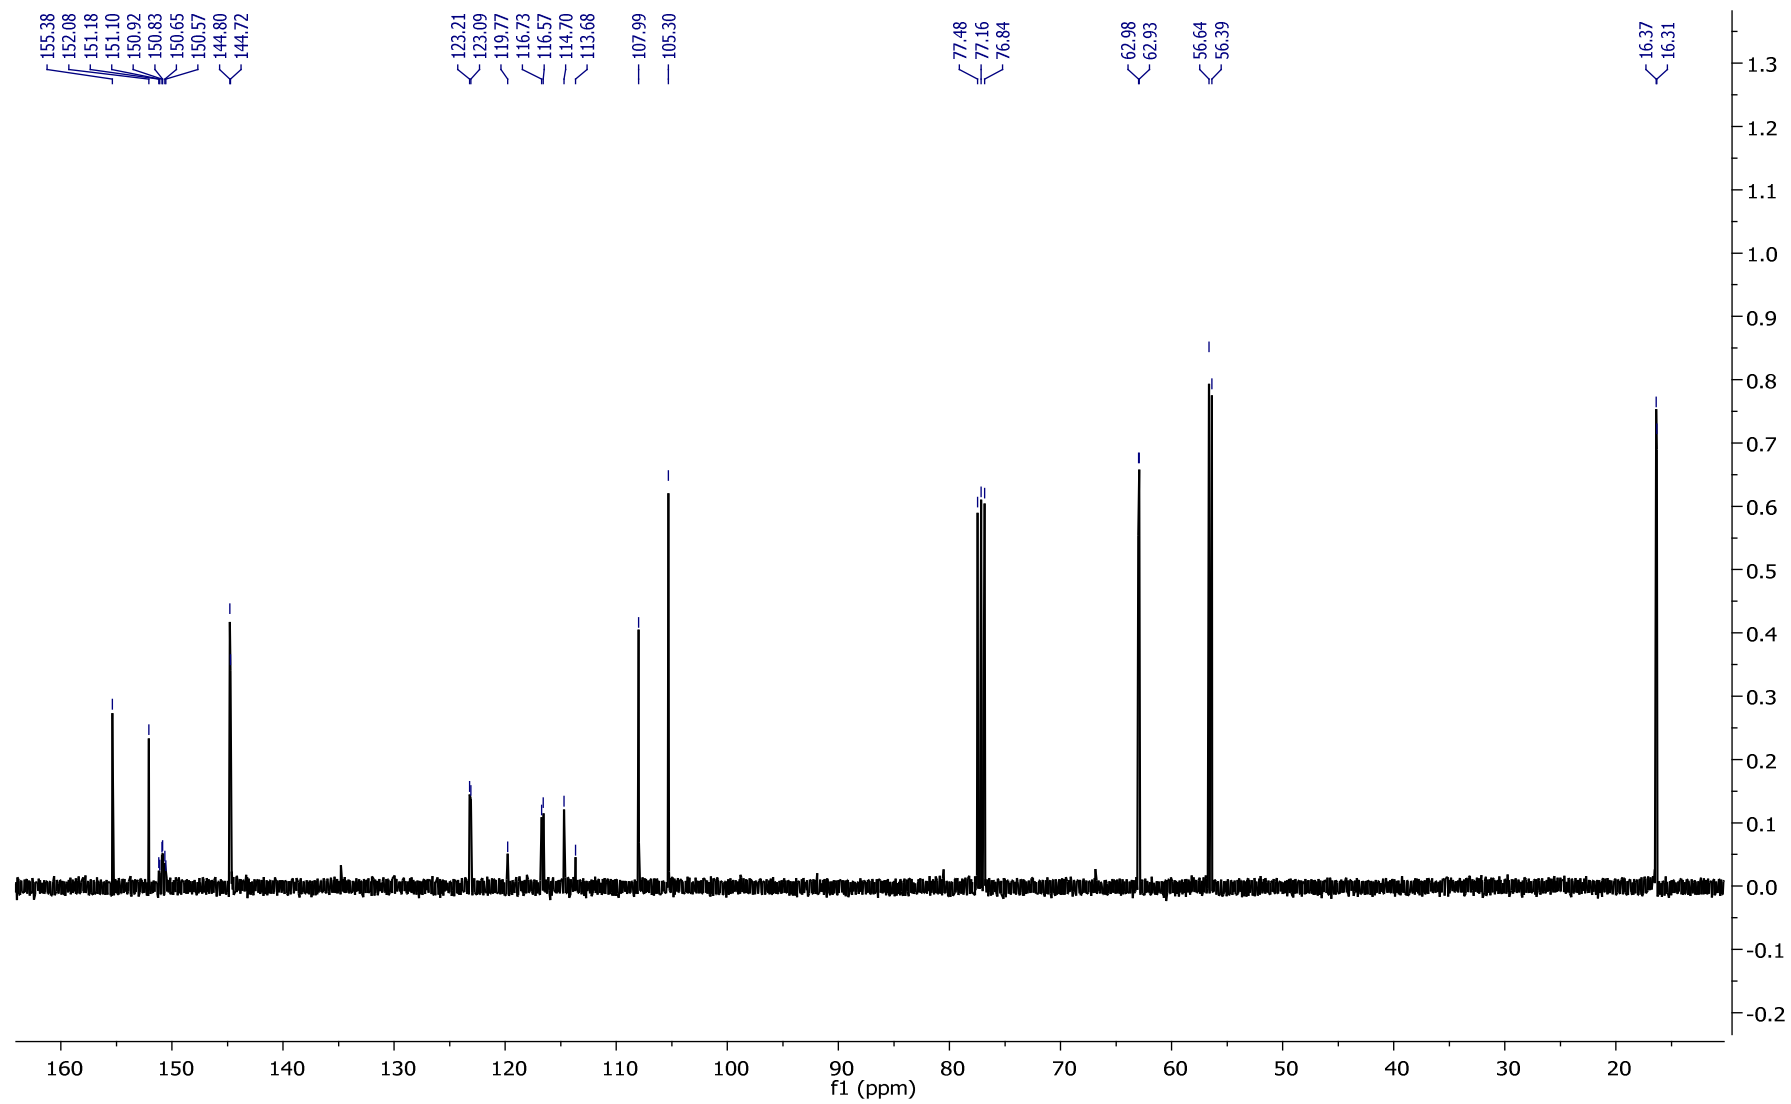

$^{19}\text{F}$  NMR

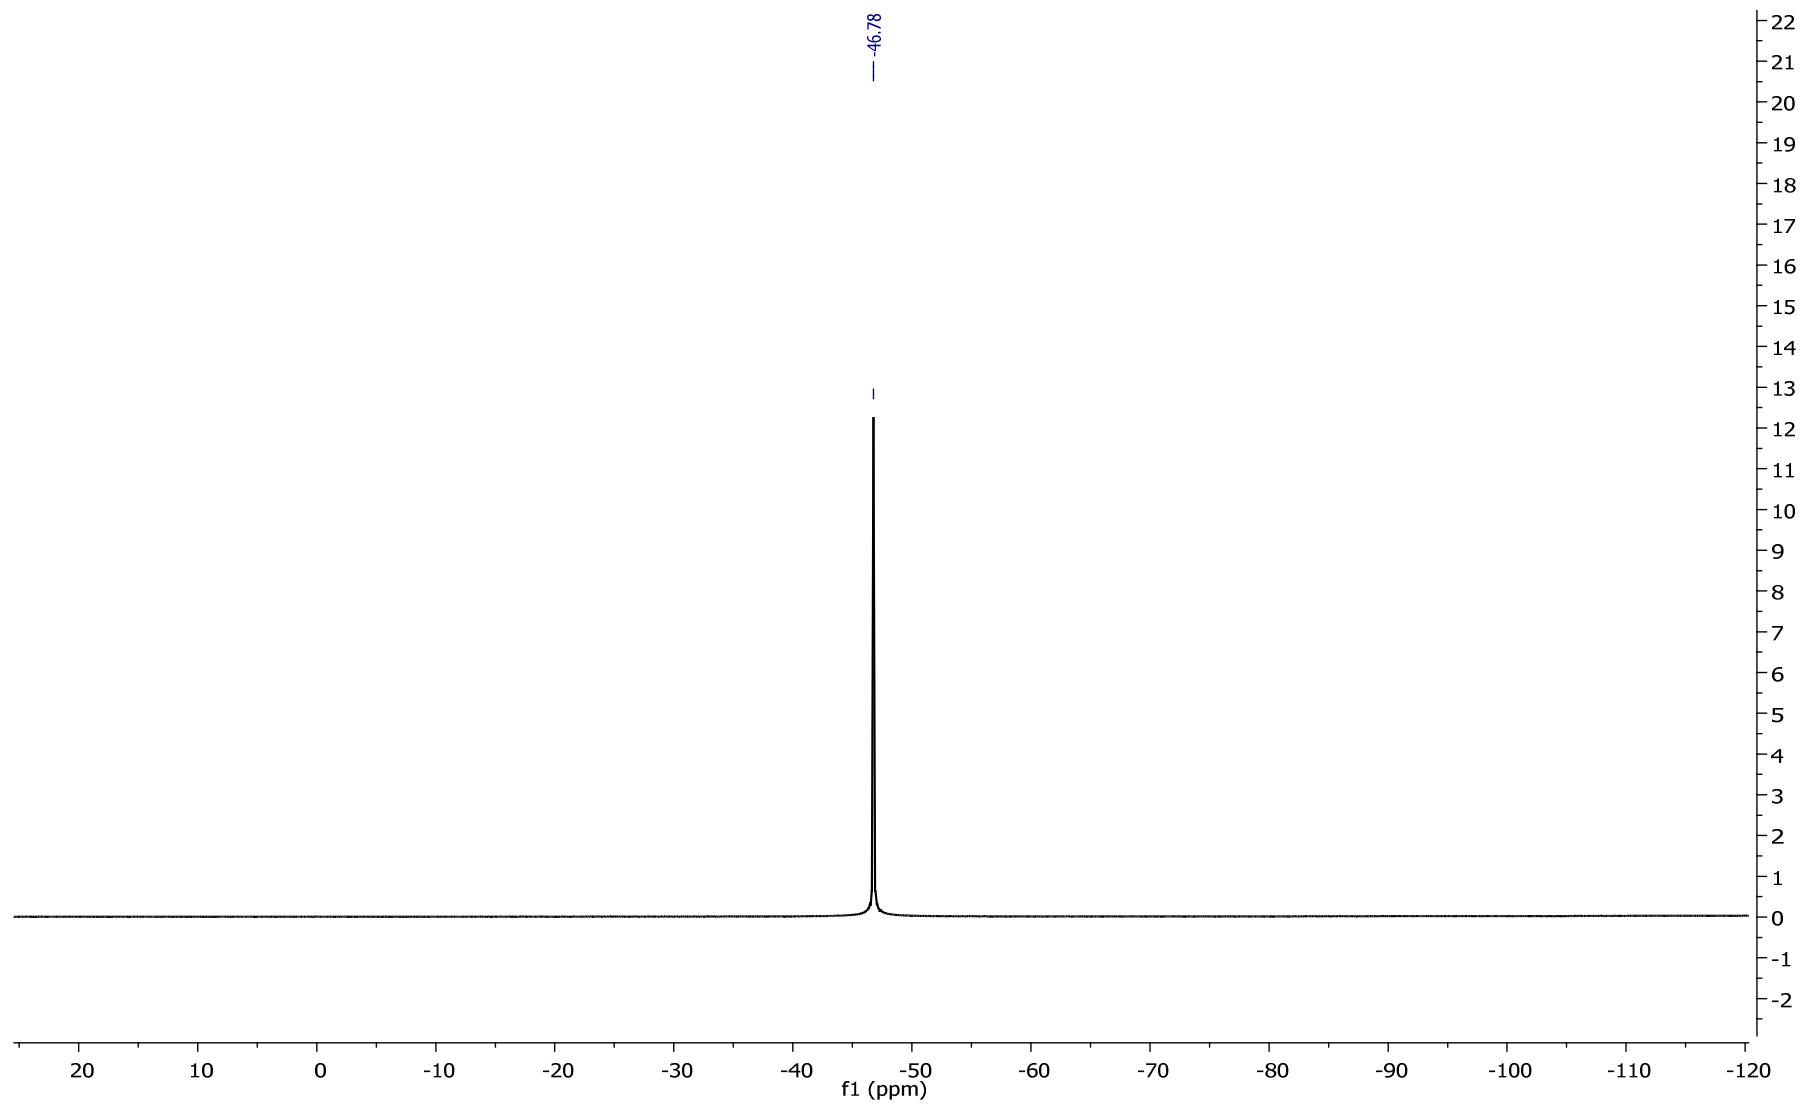

$^{31}\text{P}$  NMR

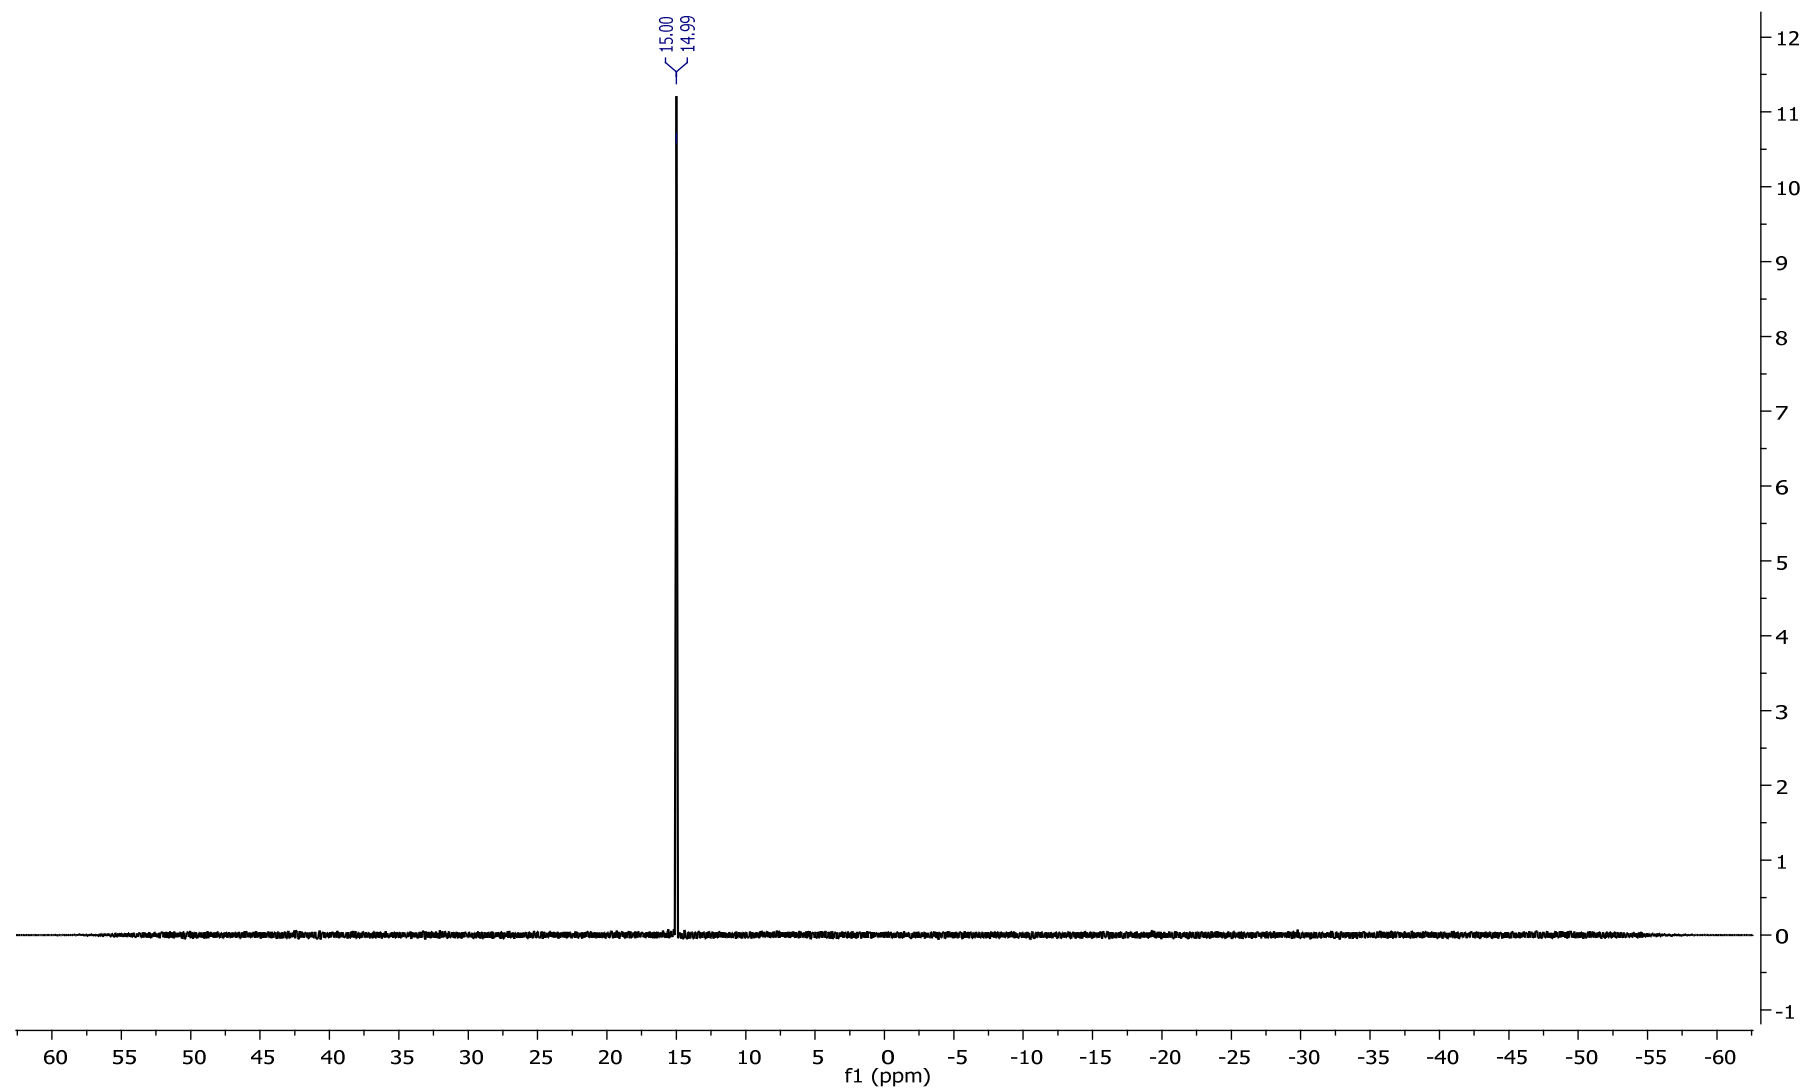

12. Diethyl (2-(bromodifluoromethyl)-7-(trifluoromethyl)quinolin-3-yl)phosphonate **41**

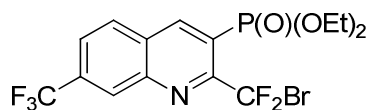

Brownish oil (93%);  $^1\text{H}$  NMR (400 MHz,  $\text{CDCl}_3$ )  $\delta$  1.39 (t,  $J = 7.0$  Hz, 6H), 4.20 (m, 2H), 4.30 (m, 2H), 7.90 (dd,  $J = 8.3$  Hz,  $J = 1.9$  Hz, 1H), 8.13 (d,  $J = 8.6$  Hz, 1H), 8.55 (q,  $^4J_{\text{H-F}} = 0.7$  Hz, 1H), 9.23 (d,  $^3J_{\text{H-P}} = 16.3$  Hz, 1H);  $^{13}\text{C}$  NMR (100 MHz)  $\delta$  16.3 (d,  $J = 6.2$  Hz), 63.4 (d,  $J = 5.9$  Hz), 116.1 (t,  $^1J_{\text{C-F}} = 305.9$  Hz), 120.8 (d,  $^1J_{\text{C-P}} = 183.6$  Hz), 123.6 (q,  $^1J_{\text{C-F}} = 275.7$  Hz), 125.1 (qd,  $^4J_{\text{C-F}} = 2.8$  Hz,  $^4J_{\text{C-P}} = 1.3$  Hz), 127.7 (qd,  $^4J_{\text{C-F}} = 4.3$  Hz,  $^4J_{\text{C-P}} = 1.3$  Hz), 128.2 (d,  $^3J_{\text{C-P}} = 10.7$  Hz), 129.8, 134.6 (q,  $^2J_{\text{C-F}} = 32.9$  Hz), 146.3, 147.8 (d,  $^2J_{\text{C-P}} = 6.5$  Hz), 154.0 (td,  $^2J_{\text{C-F}} = 27.6$  Hz,  $^2J_{\text{C-P}} = 8.7$  Hz);  $^{19}\text{F}$  NMR (376 MHz)  $\delta$  -48.3 (s,  $-\text{CF}_2\text{Br}$ ), -63.0 (s,  $-\text{CF}_3$ );  $^{31}\text{P}$  NMR (161 MHz)  $\delta$  12.9; HRMS (ESI): calcd for  $\text{C}_{15}\text{H}_{14}\text{BrF}_5\text{NNaO}_3\text{P}$   $[\text{M}+\text{Na}]^+$  483.9713, found 483.9712.

# <sup>1</sup>H NMR

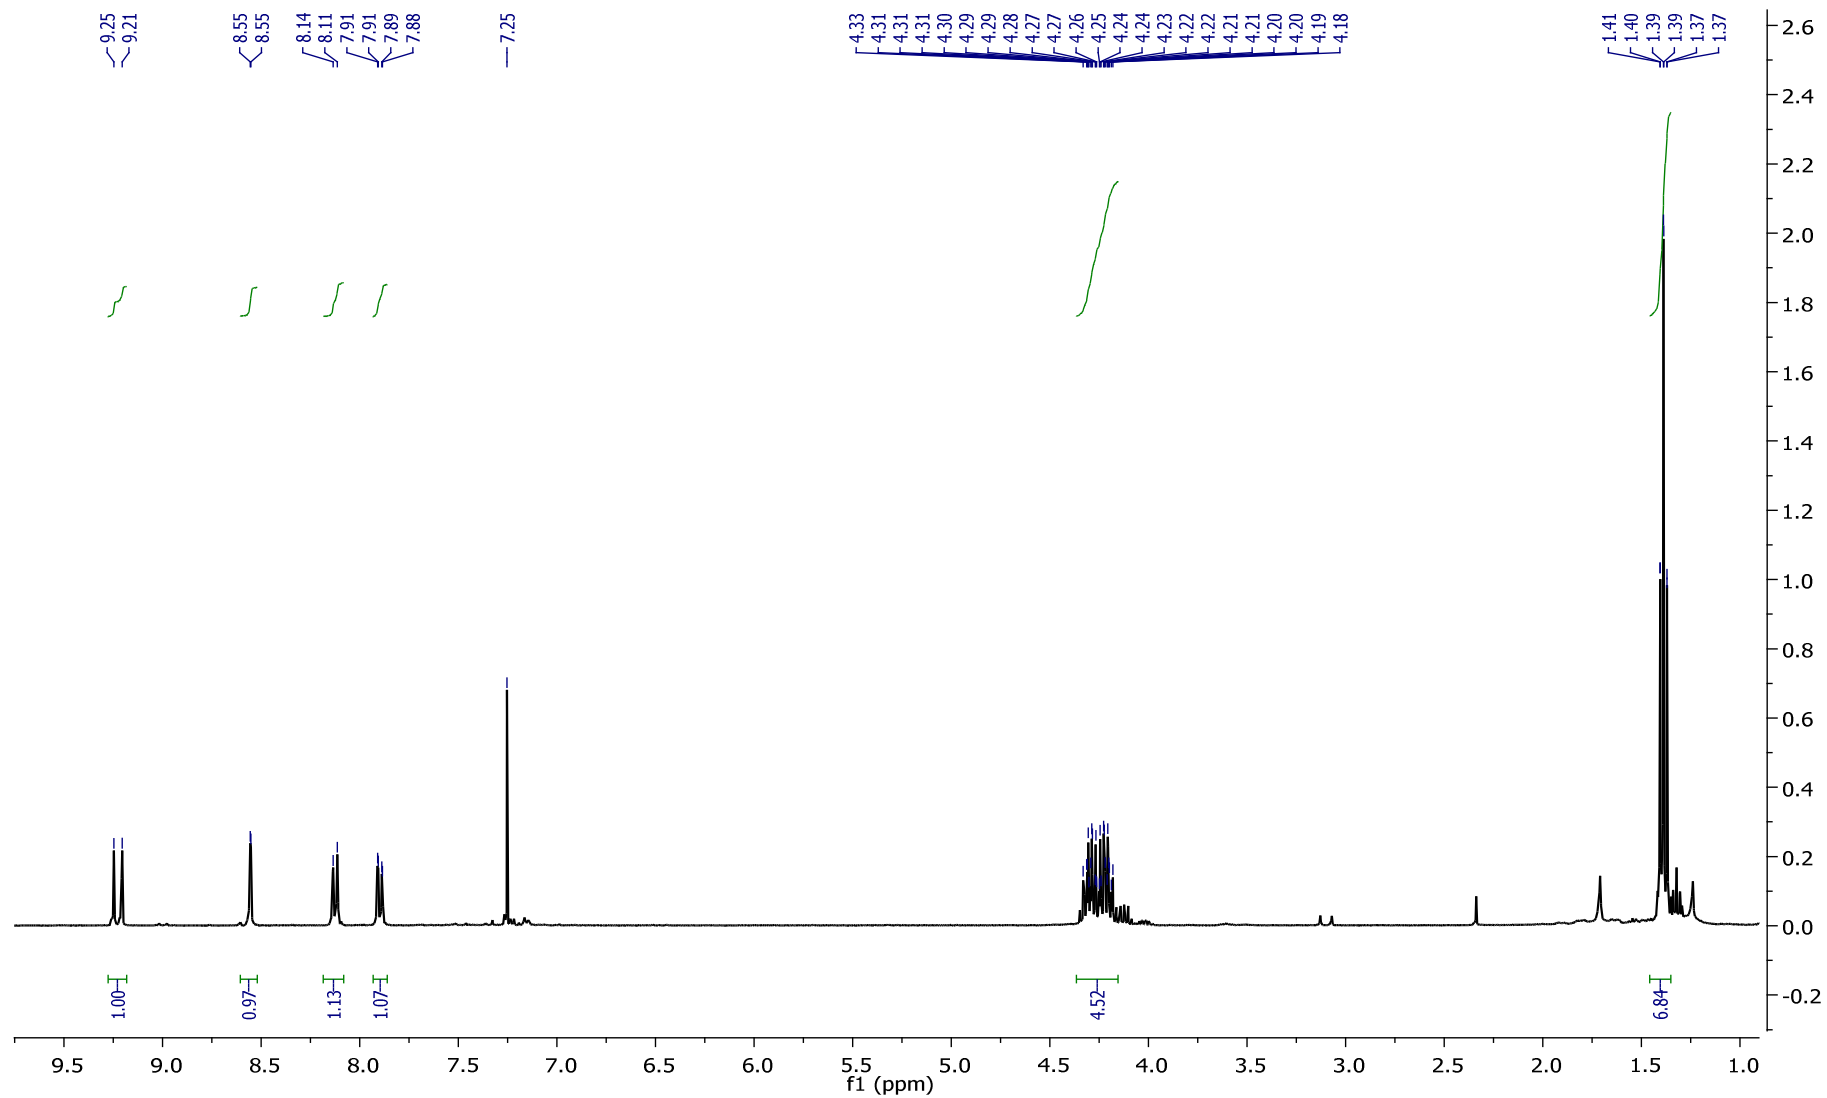

$^{13}\text{C}$  NMR

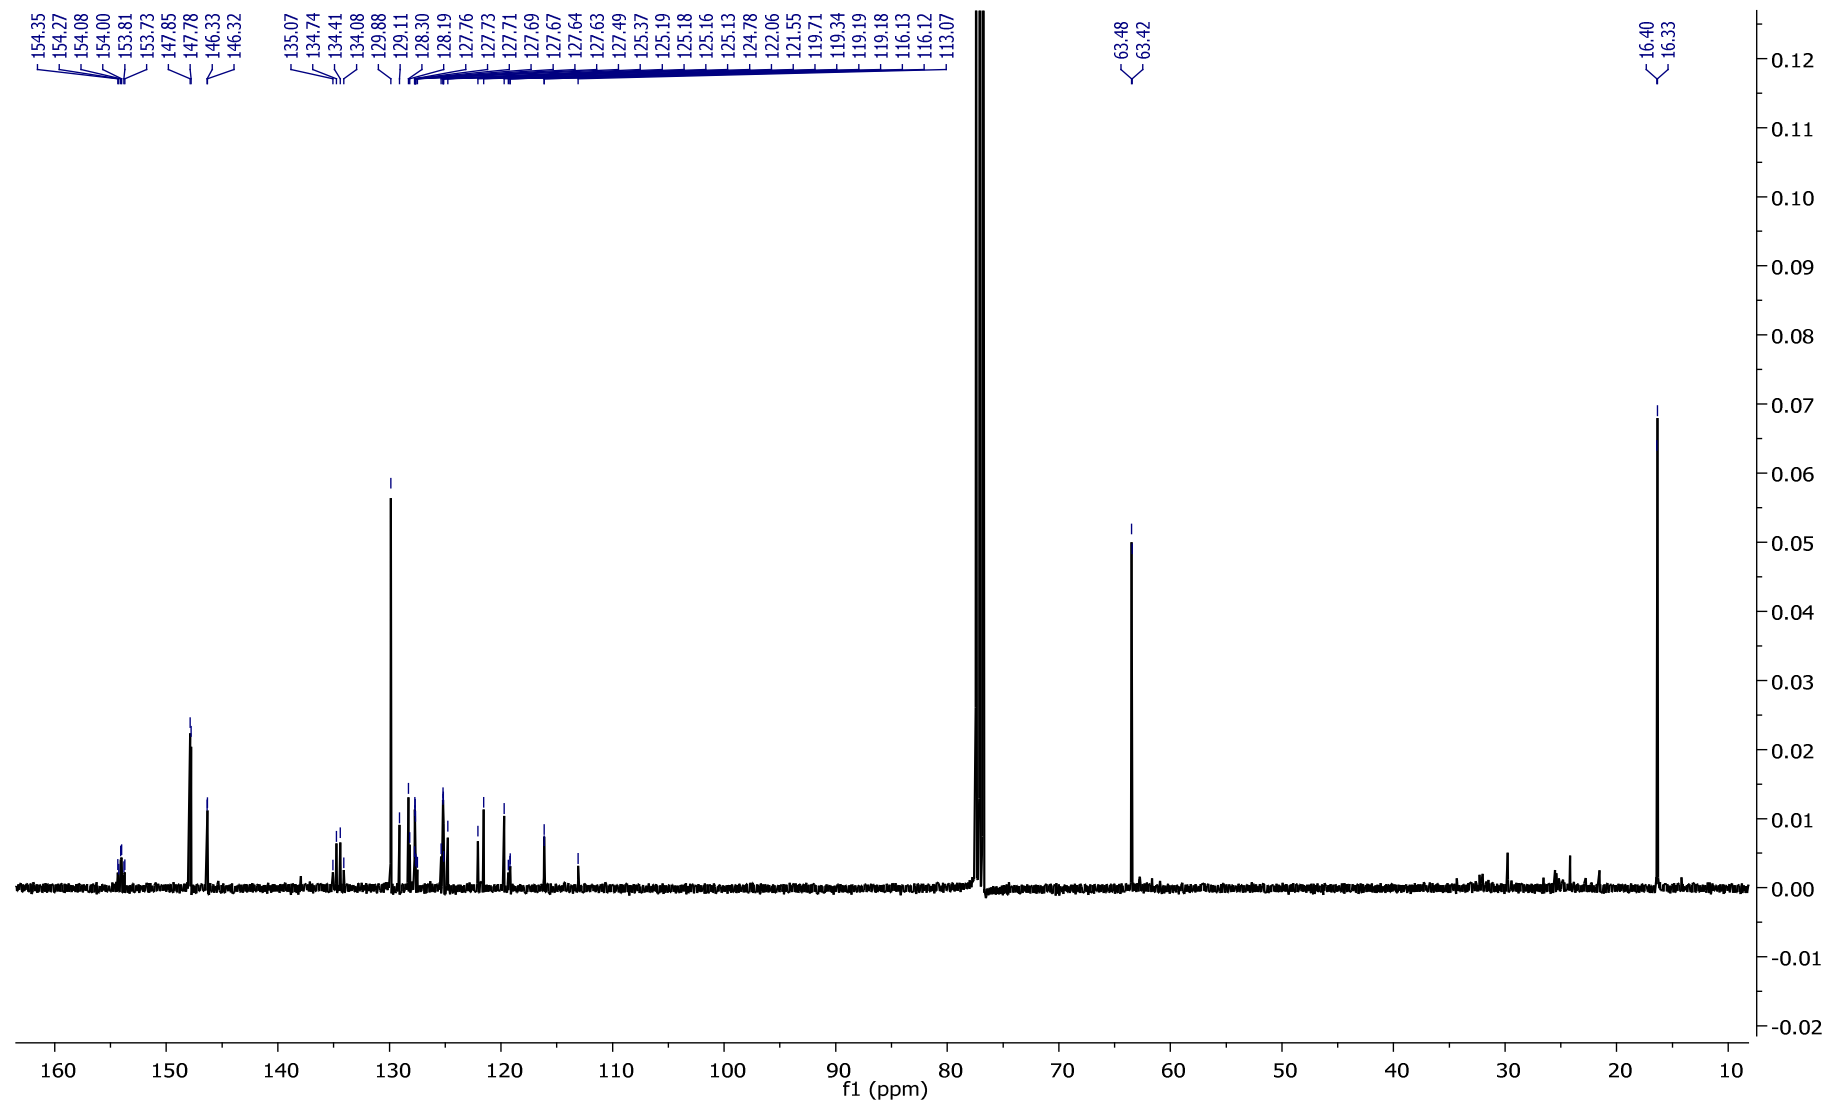

$^{19}\text{F}$  NMR

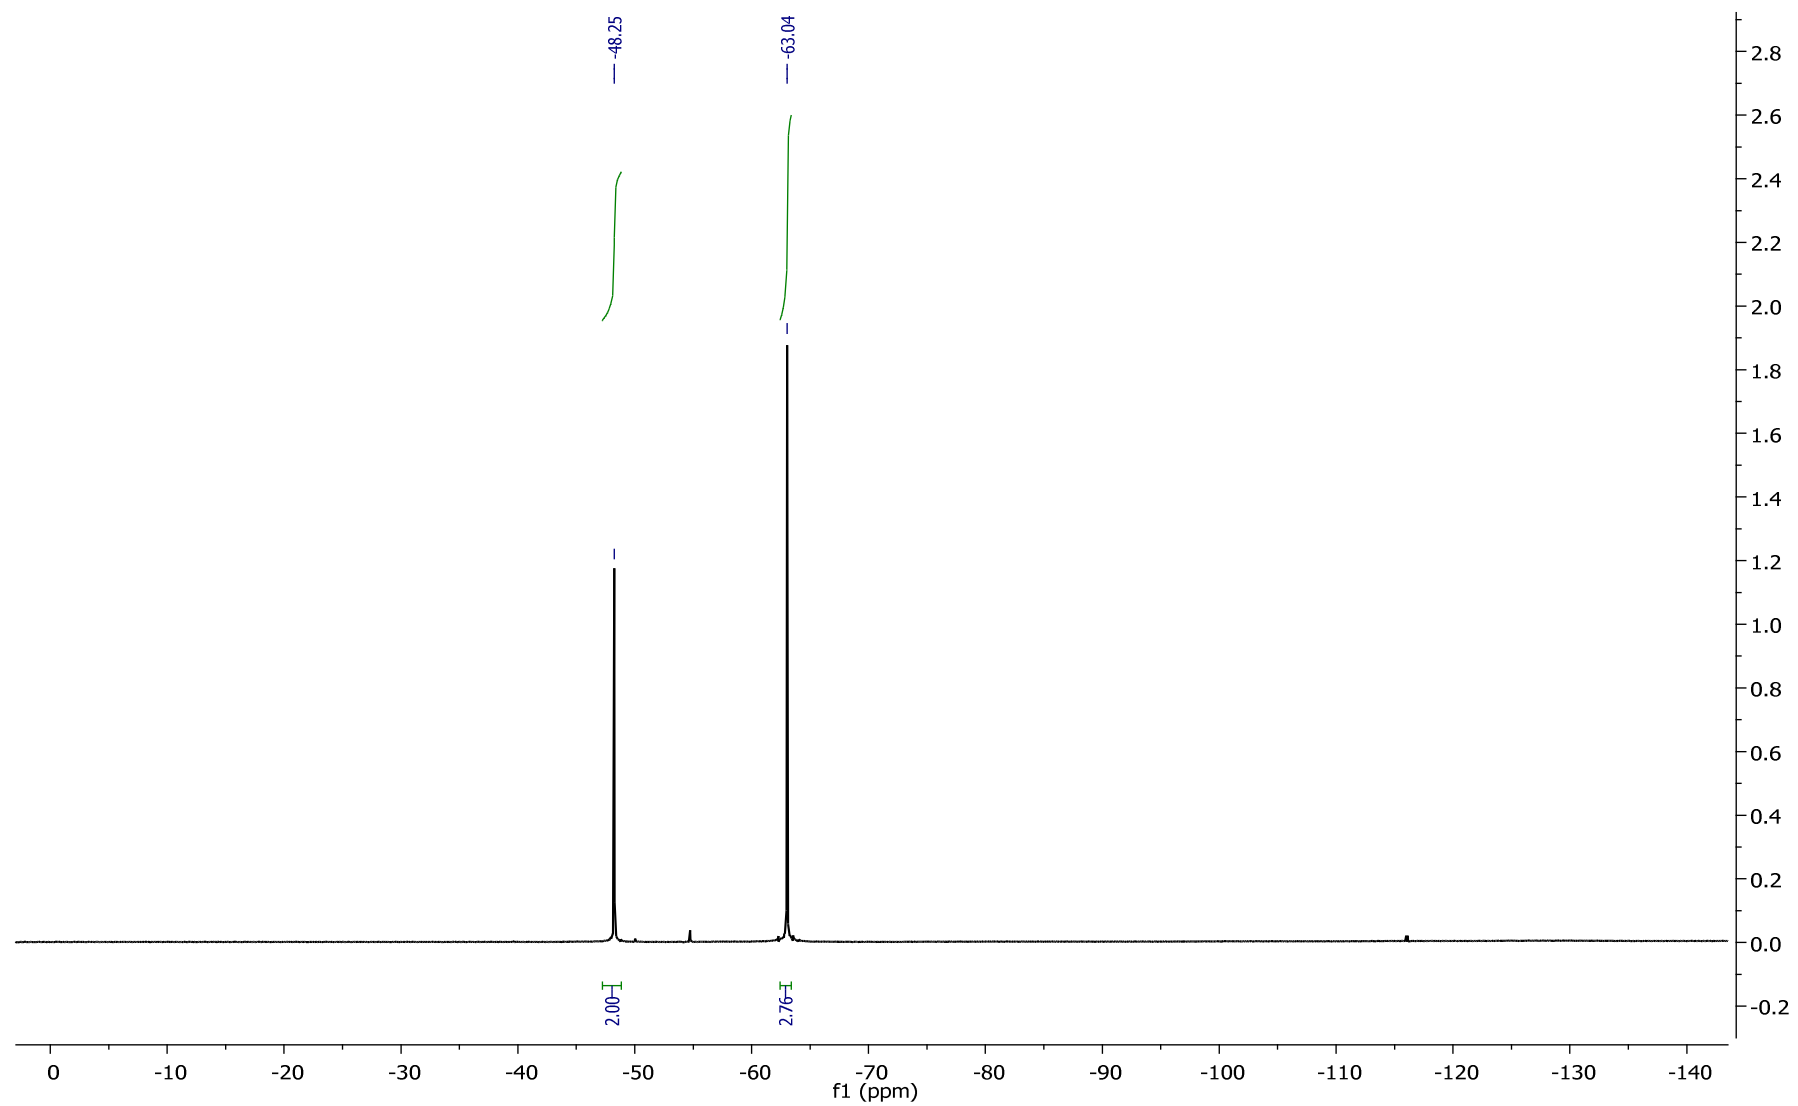



$^{31}\text{P}$  NMR

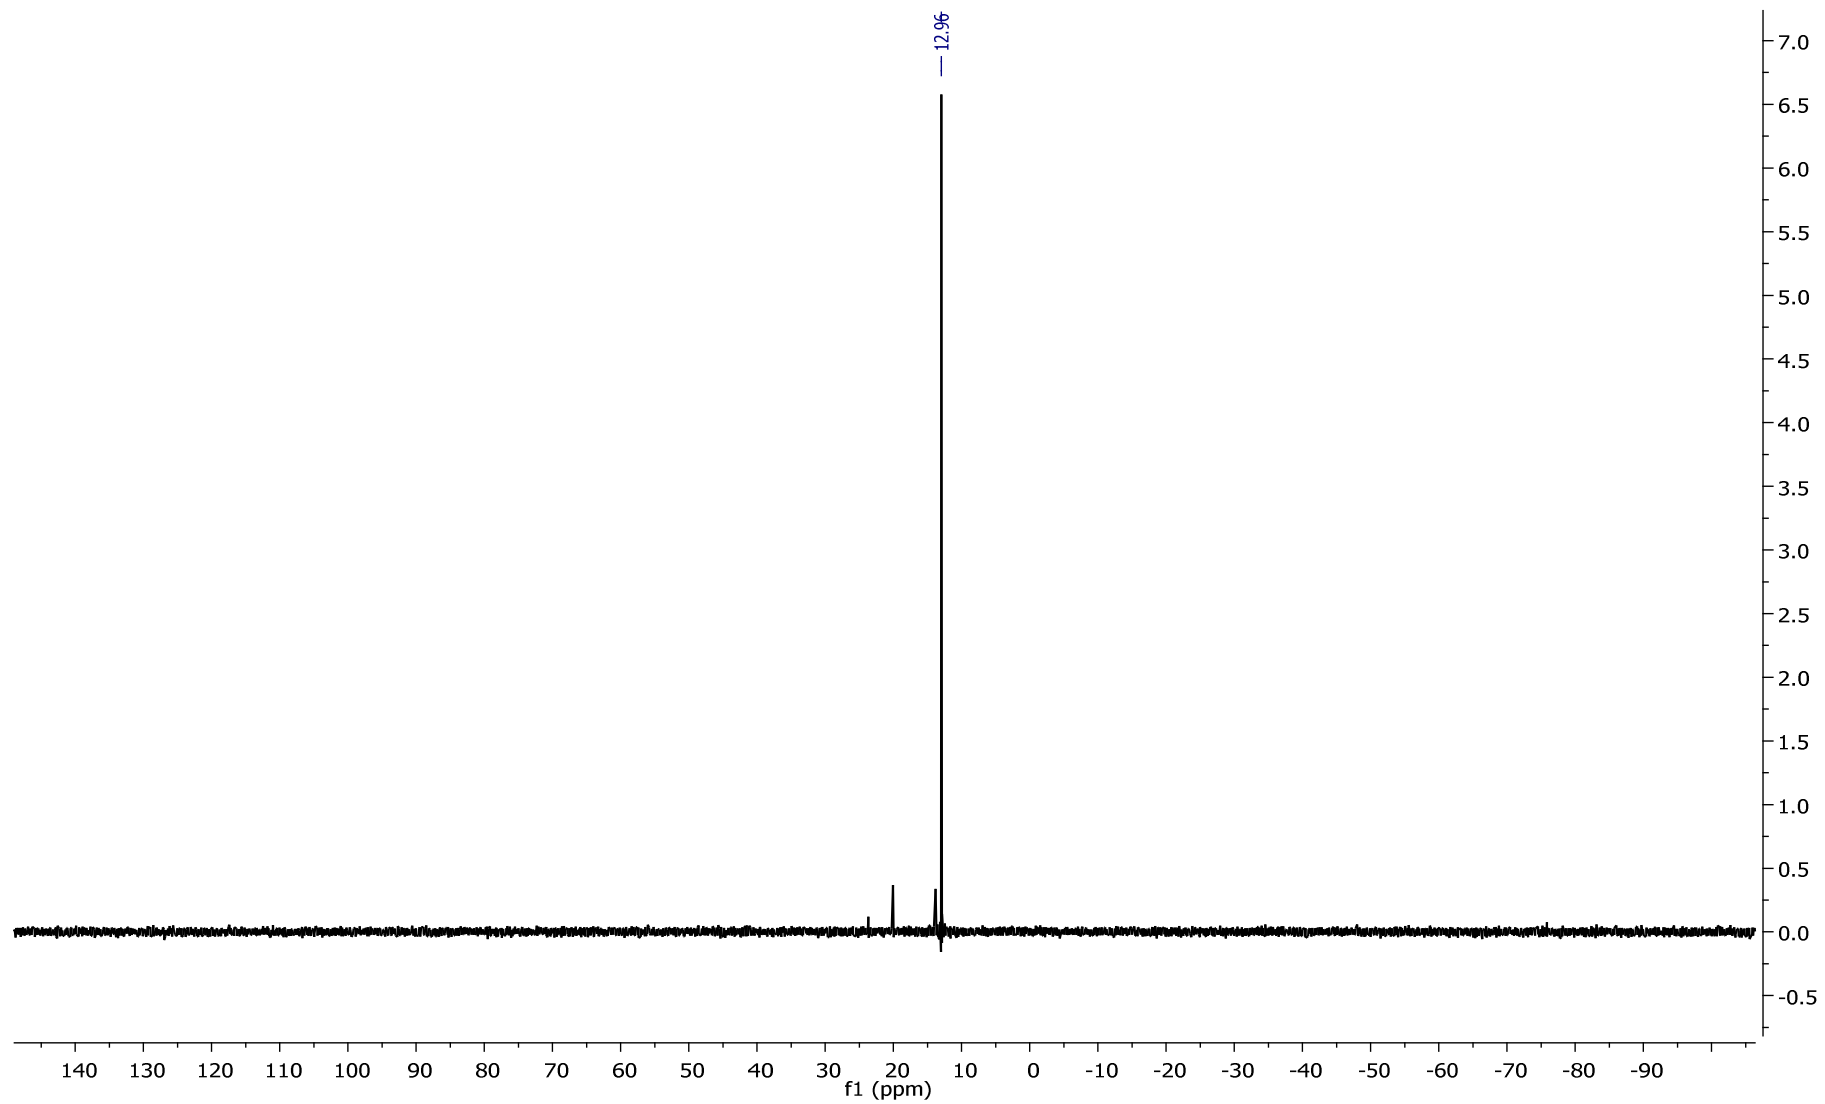

13. Diethyl (2-(difluoromethyl)quinolin-3-yl)phosphonate **4m**

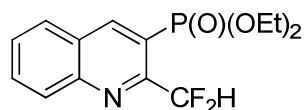

Colourless oil (60%);  $^1\text{H}$  NMR (400 MHz,  $\text{CDCl}_3$ )  $\delta$  1.32 (t,  $J = 7.1$  Hz, 6H), 4.12 (m, 2H), 4.22 (m, 2H), 7.31 (t,  $^2J_{\text{H-F}} = 53.7$  Hz, 1H), 7.67 (td,  $J = 7.5$  Hz,  $J = 0.7$  Hz, 1H), 7.86 (td,  $J = 8.3$  Hz,  $J = 1.2$  Hz, 1H), 7.92 (d,  $J = 7.5$  Hz, 1H), 8.24 (d,  $J = 8.3$  Hz, 1H), 8.90 (d,  $^3J_{\text{H-P}} = 15.4$  Hz, 1H);  $^{13}\text{C}$  NMR (100 MHz)  $\delta$  16.3 (d,  $J = 6.4$  Hz), 63.2 (d,  $J = 5.8$  Hz), 110.9 (t,  $^1J_{\text{C-F}} = 242.1$  Hz), 120.1 (dt,  $^1J_{\text{C-P}} = 184.1$  Hz,  $^3J_{\text{C-F}} = 2.8$  Hz), 127.0 (dt,  $^3J_{\text{C-P}} = 11.9$  Hz,  $^5J_{\text{C-F}} = 1.4$  Hz), 128.5, 129.0, 130.1 (d,  $^4J_{\text{C-P}} = 1.2$  Hz), 132.7, 145.4 (d,  $^2J_{\text{C-P}} = 7.5$  Hz), 148.5, 151.4 (td,  $^2J_{\text{C-F}} = 21.7$  Hz,  $^2J_{\text{C-P}} = 11.3$  Hz);  $^{19}\text{F}$  NMR (376 MHz)  $\delta$  -115.7 (d,  $^2J_{\text{F-H}} = 53.9$  Hz);  $^{31}\text{P}$  NMR (161 MHz)  $\delta$  15.0 (t,  $^4J_{\text{P-F}} = 1.2$  Hz); HRMS (ESI): calcd for  $\text{C}_{14}\text{H}_{17}\text{F}_2\text{NO}_3\text{P}$   $[\text{M}+\text{H}]^+$  316.0909, found 316.0912.

<sup>1</sup>H NMR

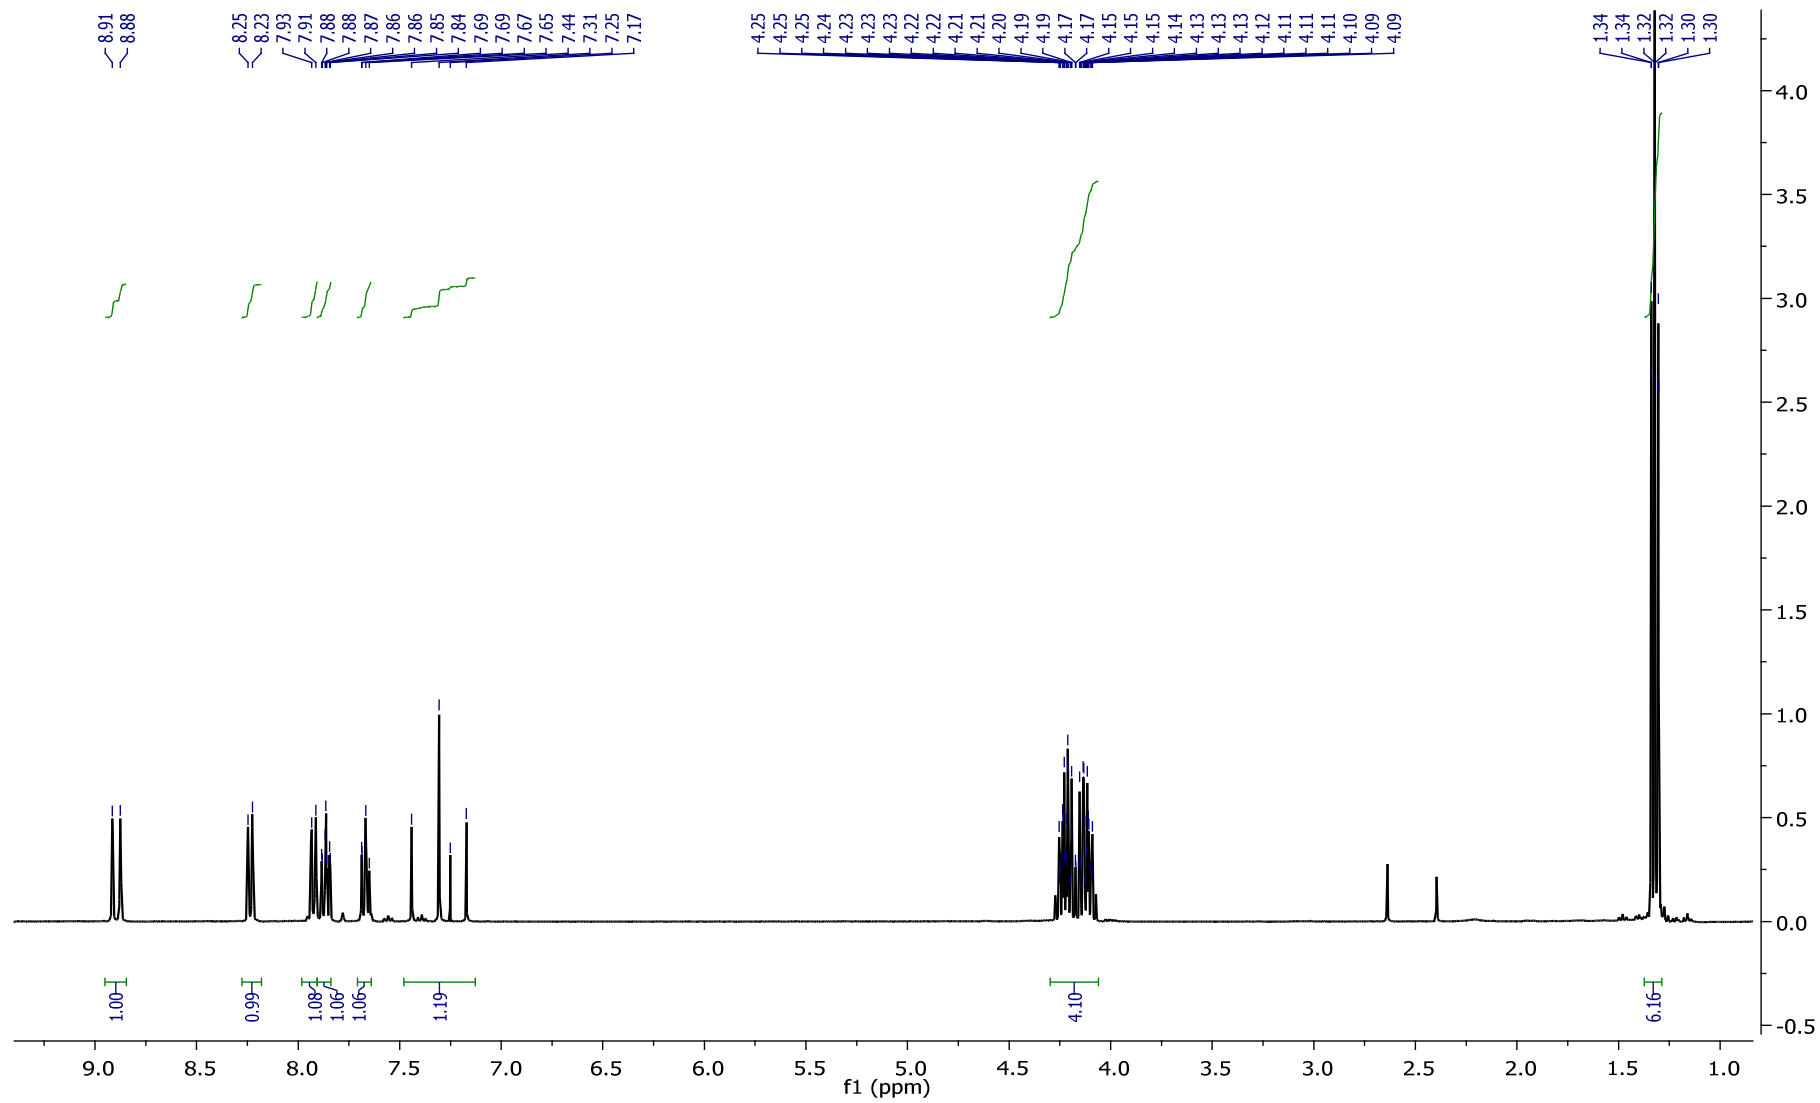

### $^{13}\text{C}$ NMR

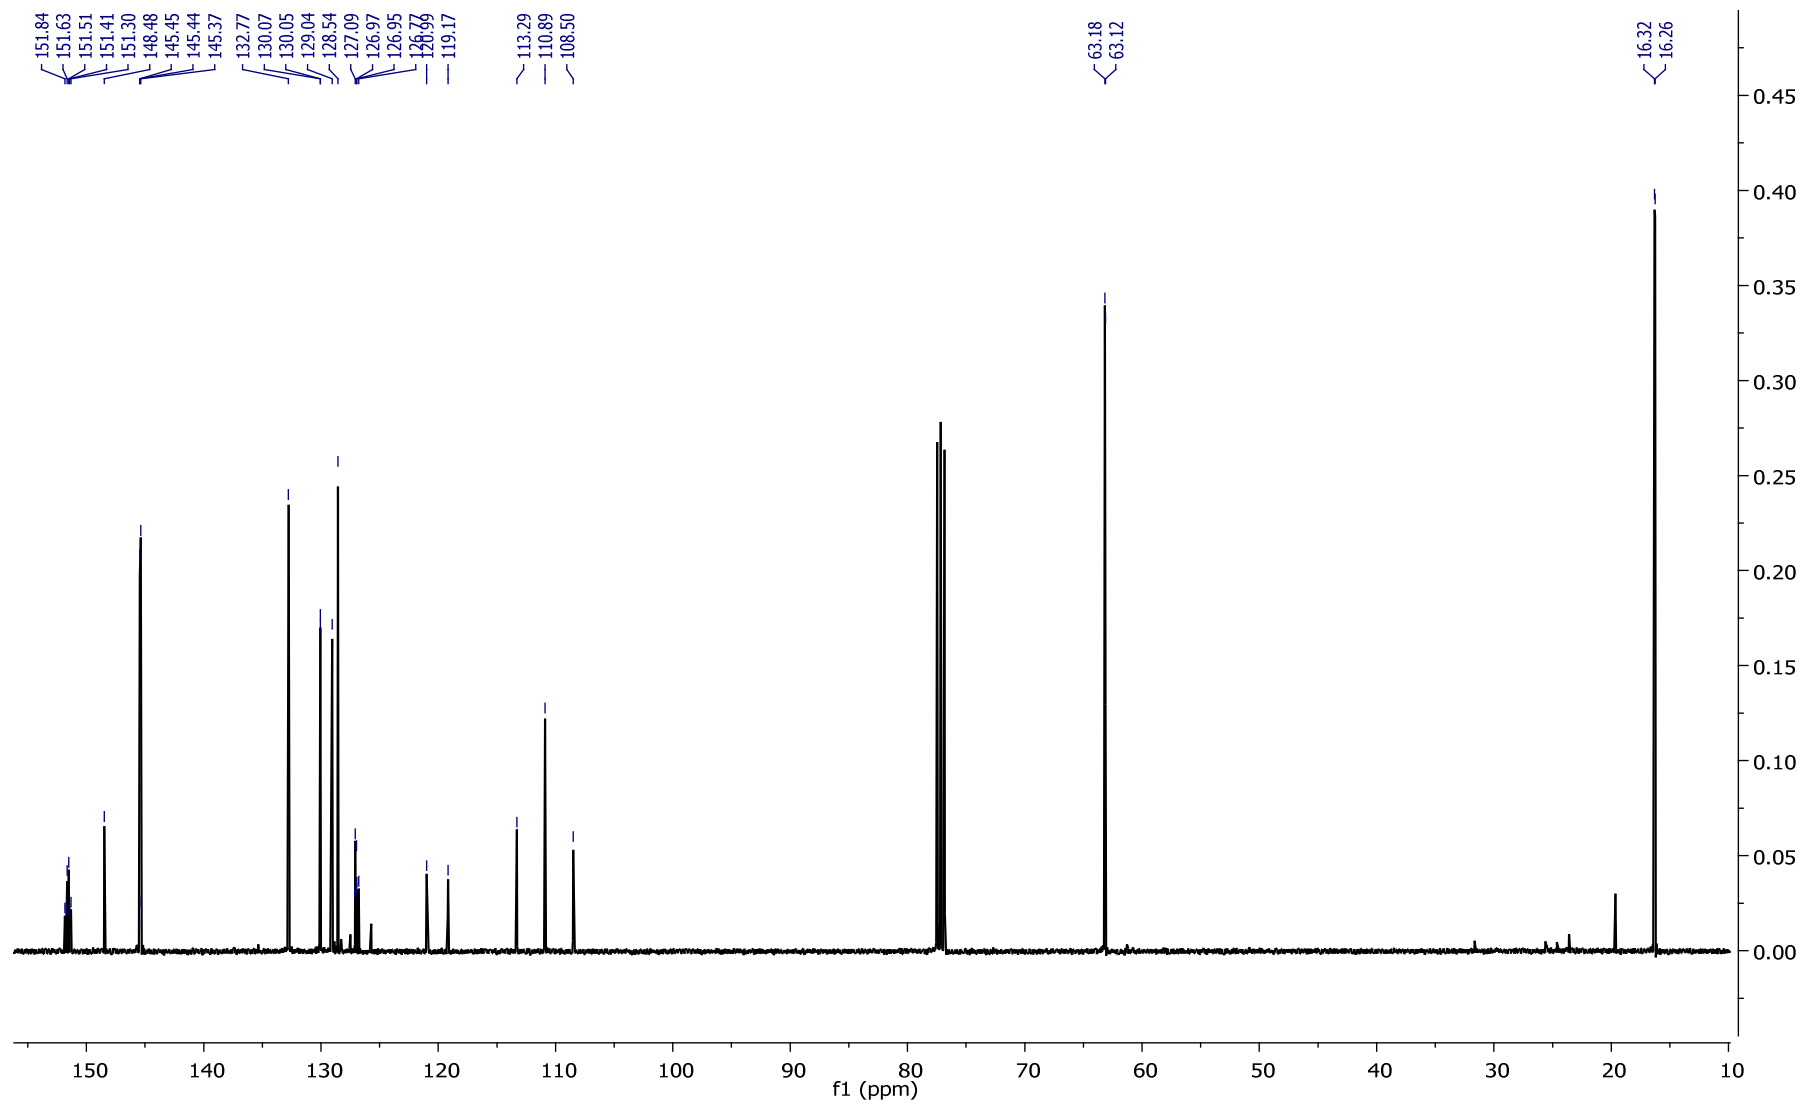

$^{19}\text{F}$  NMR

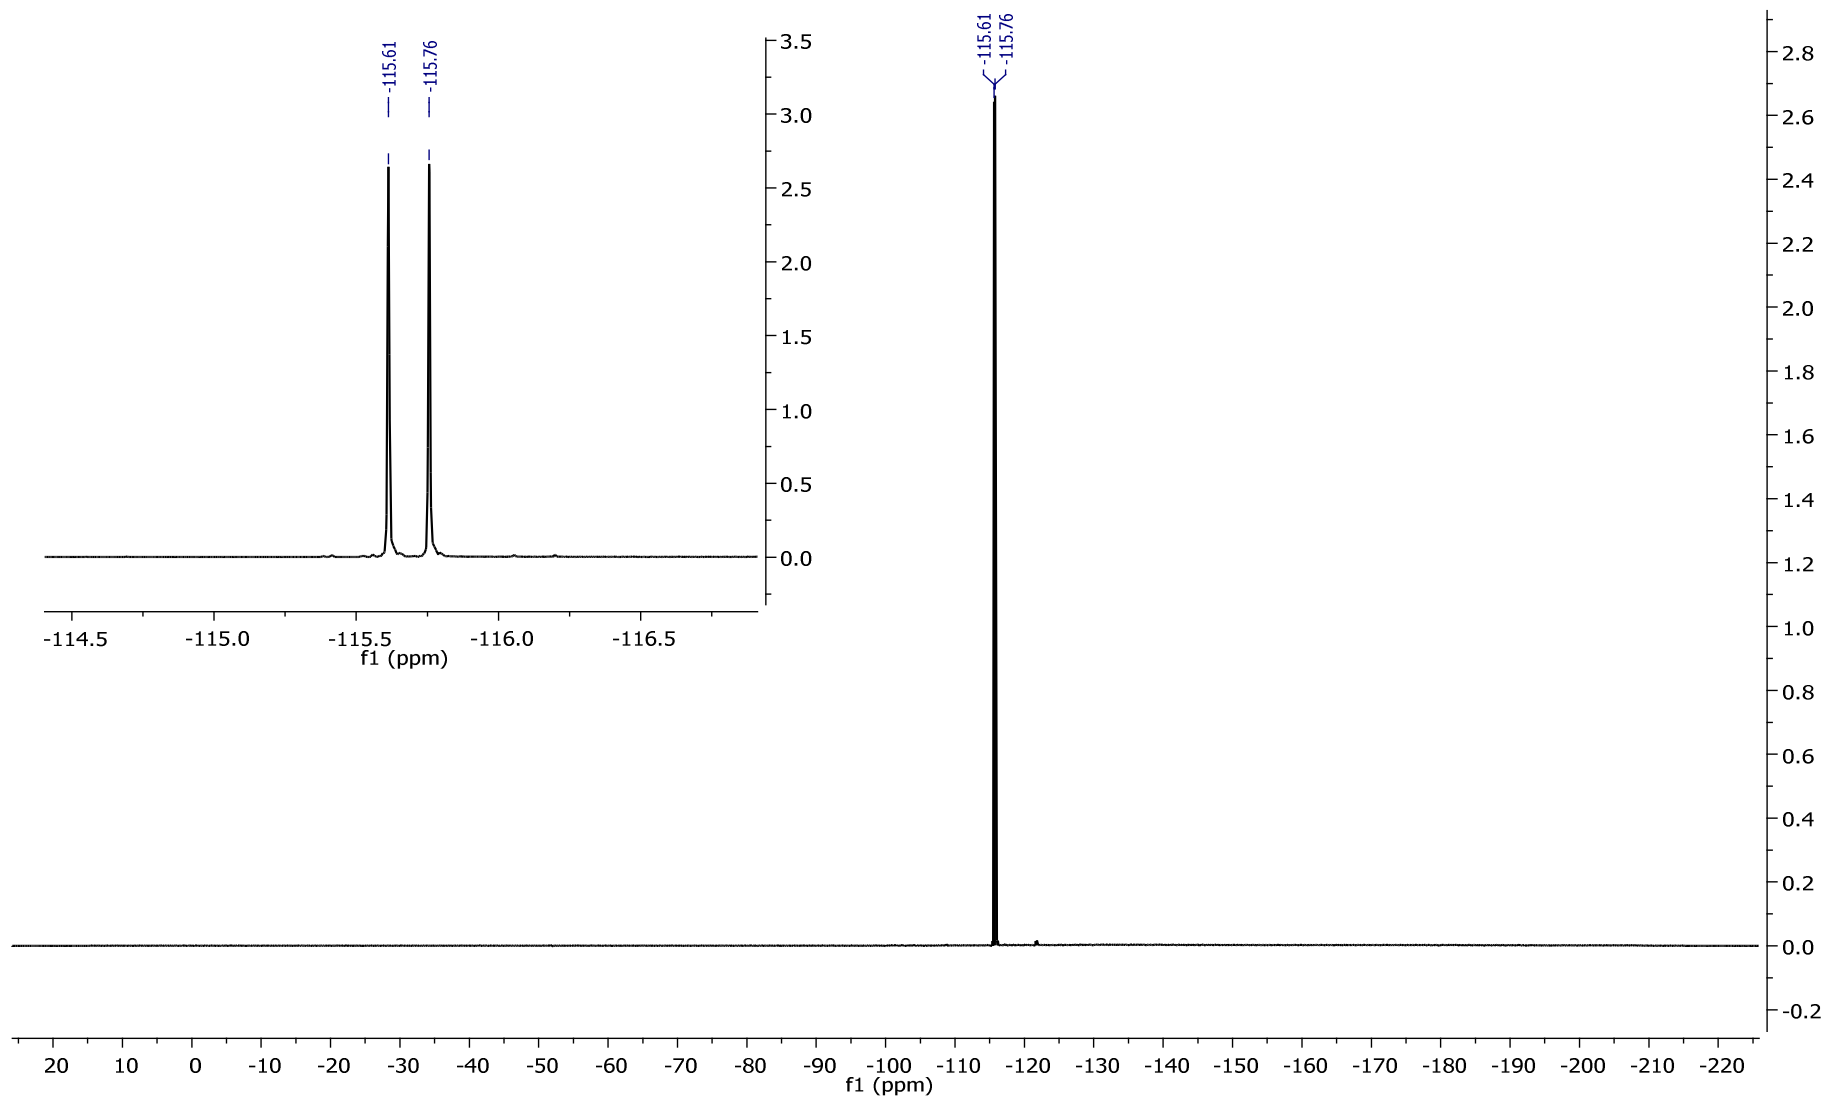

$^{31}\text{P}$  NMR

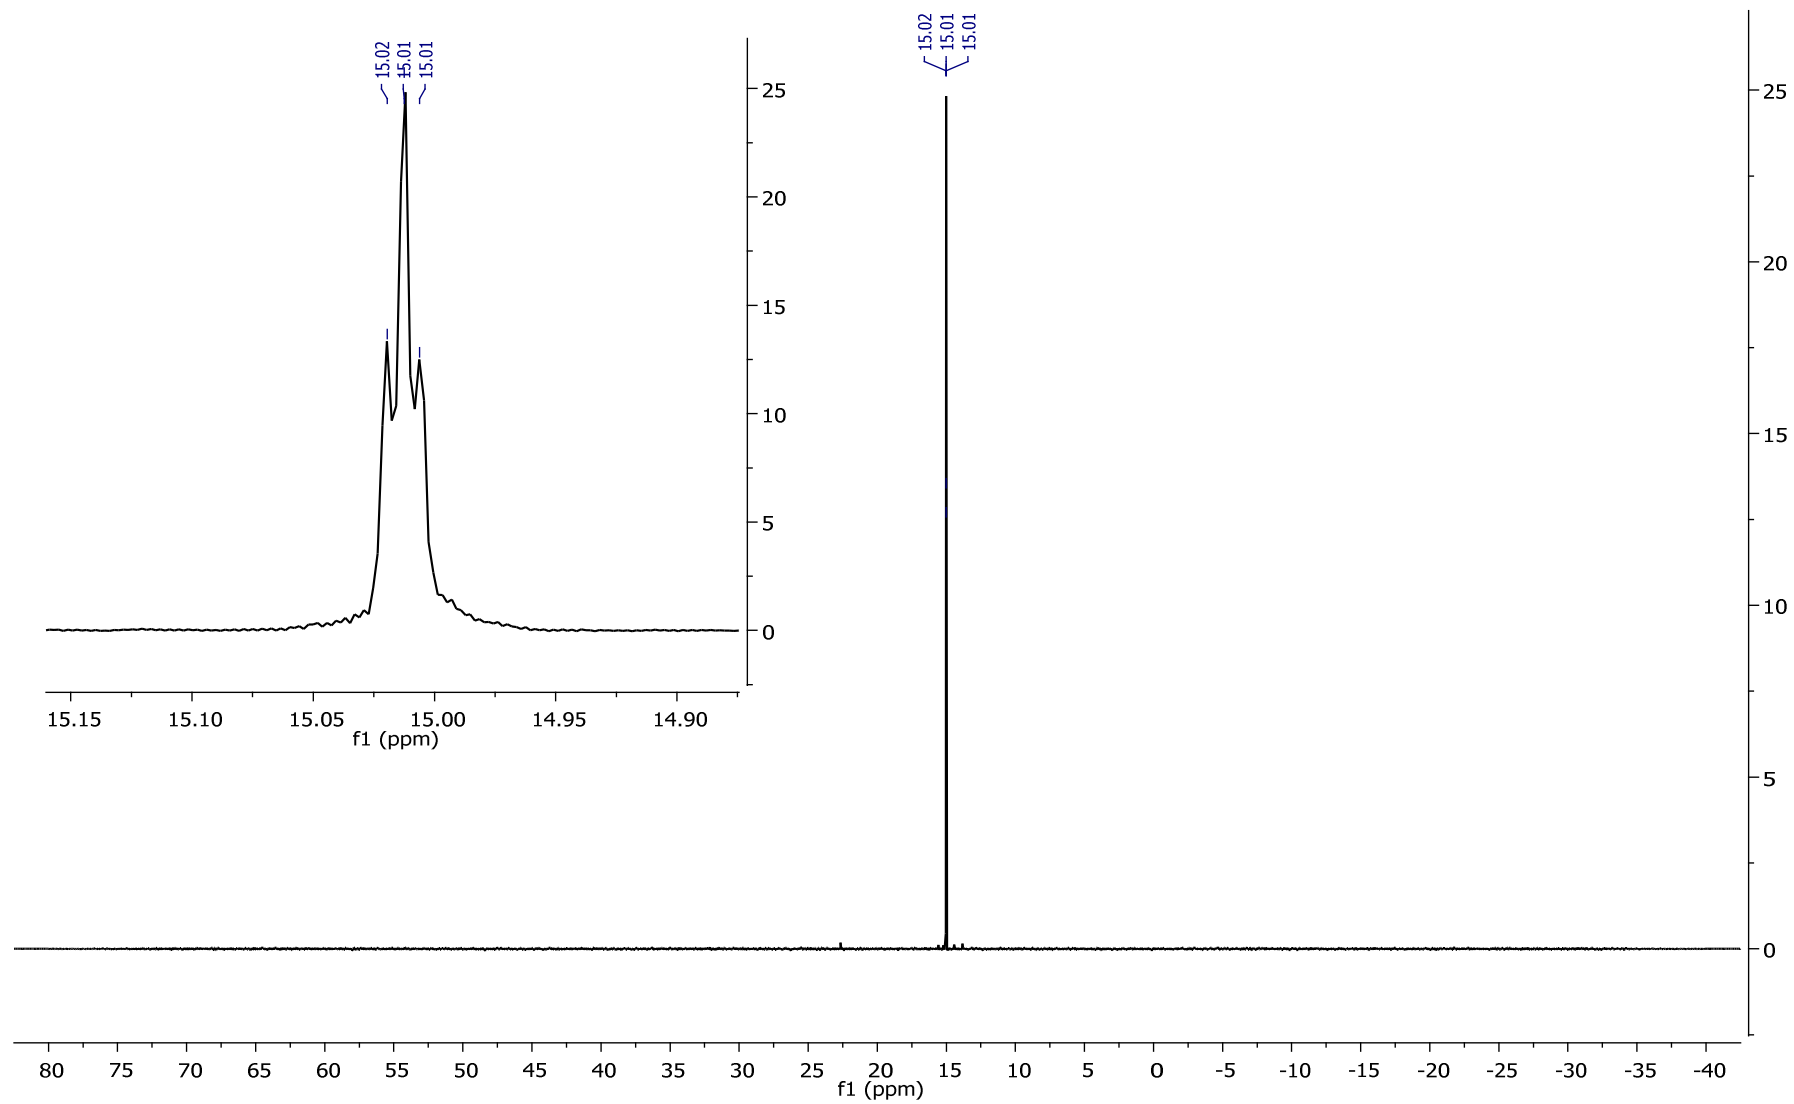

14. Diethyl (6-chloro-2-(difluoromethyl)quinolin-3-yl)phosphonate **4n**

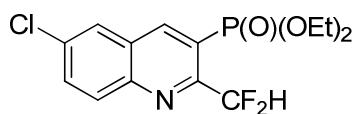

Colourless oil (54%);  $^1\text{H}$  NMR (400 MHz,  $\text{CDCl}_3$ )  $\delta$  1.35 (t,  $J = 7.2$  Hz, 6H), 4.14 (m, 2H), 4.25 (m, 2H), 7.31 (t,  $^2J_{\text{H-F}} = 53.8$  Hz, 1H), 7.82 (dd,  $J = 8.9$  Hz,  $J = 2.4$  Hz, 1H), 7.93 (d,  $J = 2.4$  Hz, 1H), 8.23 (d,  $J = 9.3$  Hz, 1H), 8.82 (d,  $^3J_{\text{H-P}} = 15.8$  Hz, 1H);  $^{13}\text{C}$  NMR (100 MHz)  $\delta$  16.3 (d,  $J = 6.2$  Hz), 63.3 (d,  $J = 5.6$  Hz), 110.7 (t,  $^1J_{\text{C-F}} = 242.5$  Hz), 121.3 (dt,  $^1J_{\text{C-P}} = 183.7$  Hz,  $^3J_{\text{C-F}} = 3.3$  Hz), 127.1, 127.6 (dt,  $^3J_{\text{C-P}} = 12.5$  Hz,  $^5J_{\text{C-F}} = 1.5$  Hz), 131.7 (d,  $^4J_{\text{C-P}} = 1.4$  Hz), 133.7, 135.1 (d,  $^5J_{\text{C-P}} = 1.8$  Hz), 144.3 (d,  $^2J_{\text{C-P}} = 7.1$  Hz), 146.9, 151.8 (td,  $^2J_{\text{C-F}} = 21.8$  Hz,  $^2J_{\text{C-P}} = 10.8$  Hz);  $^{19}\text{F}$  NMR (376 MHz)  $\delta$  -115.8 (d,  $^2J_{\text{F-H}} = 53.4$  Hz);  $^{31}\text{P}$  NMR (161 MHz)  $\delta$  14.3; HRMS (ESI): calcd for  $\text{C}_{14}\text{H}_{15}\text{ClF}_2\text{NNaO}_3\text{P}$   $[\text{M}+\text{Na}]^+$  372.0338, found 372.0344.

# <sup>1</sup>H NMR

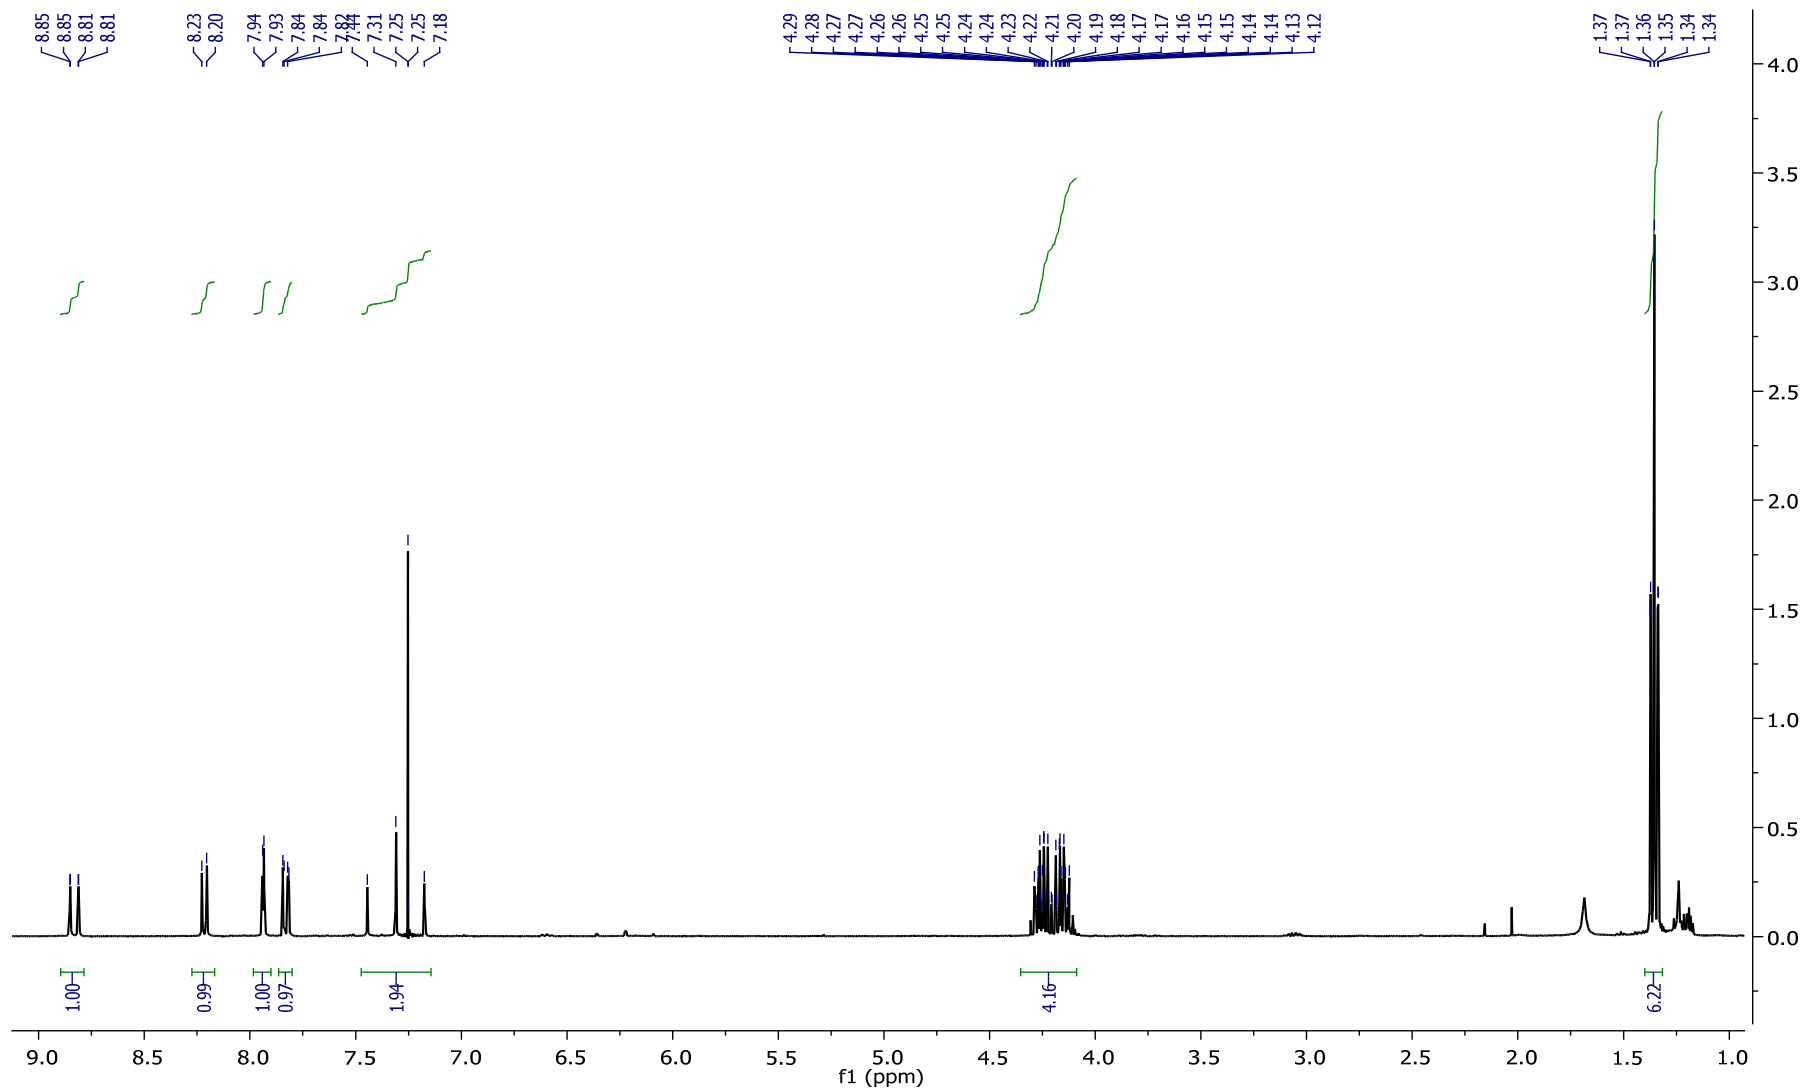



### $^{13}\text{C}$ NMR

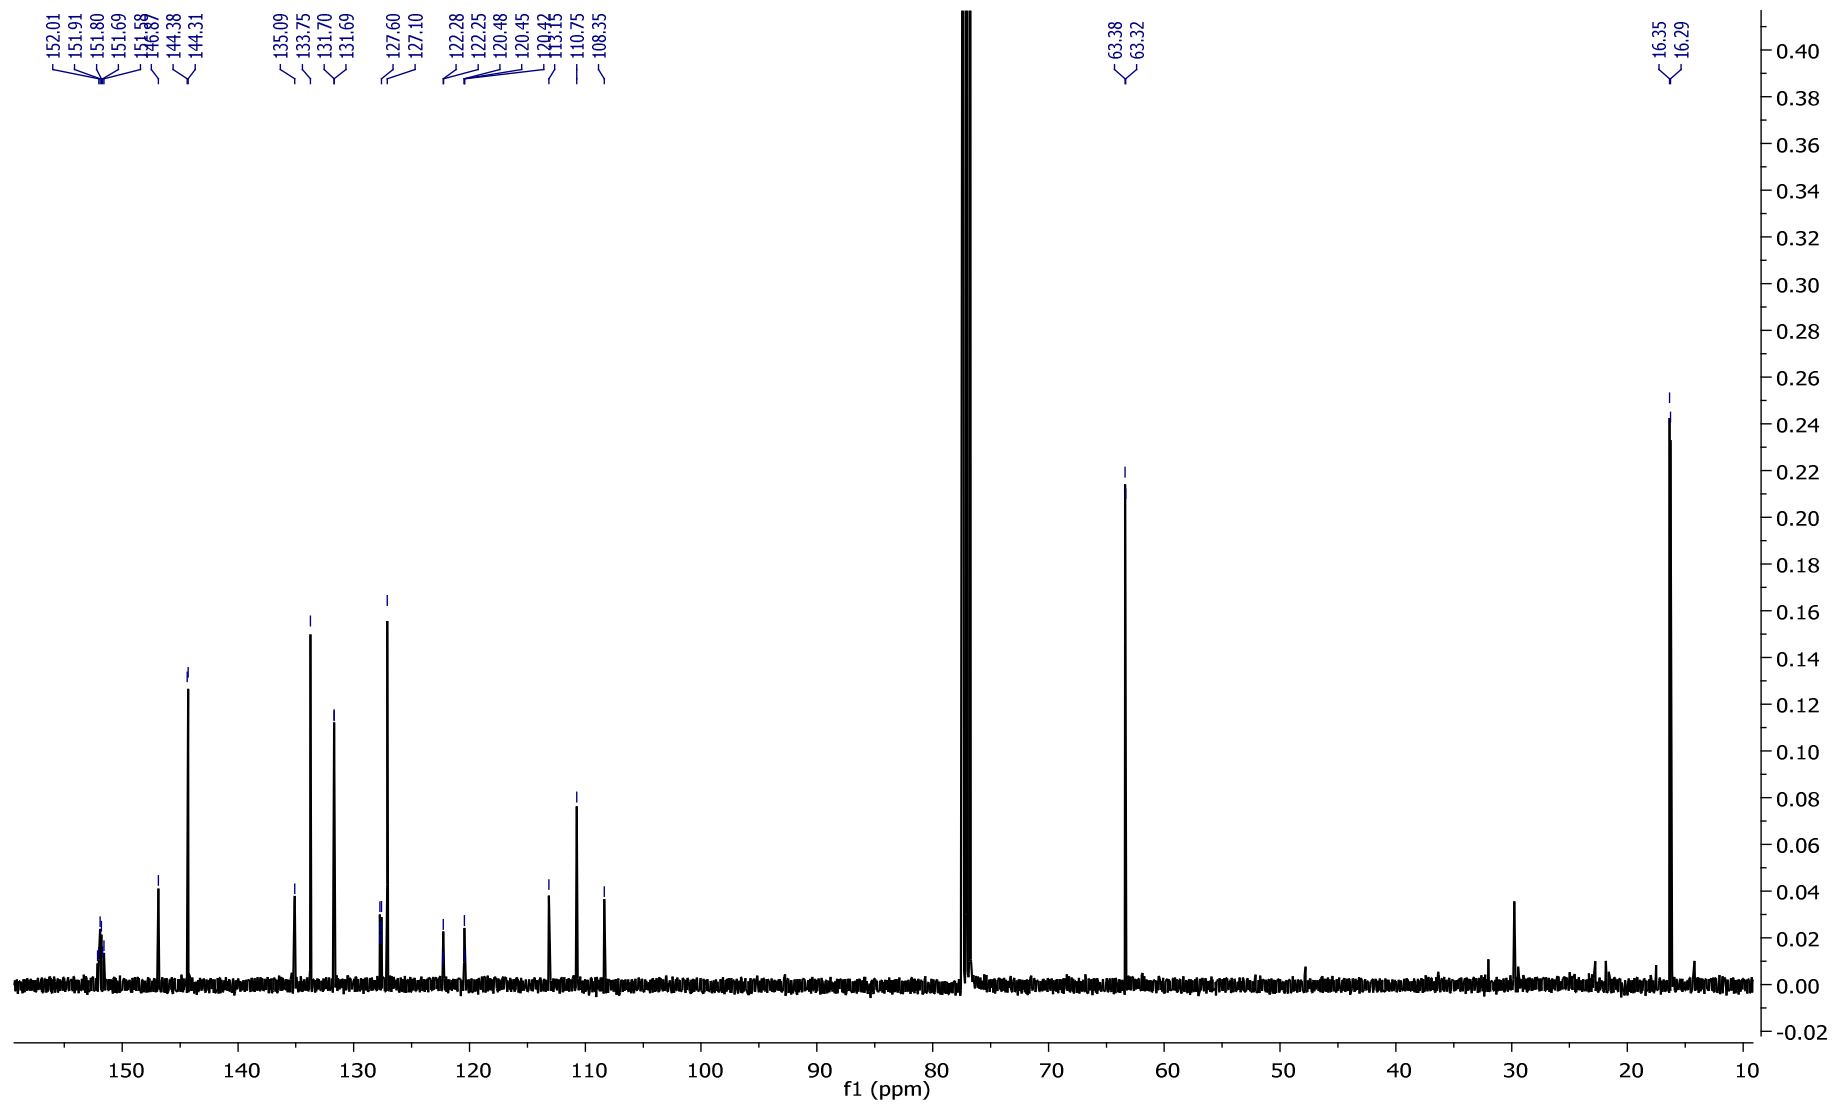

$^{19}\text{F}$  NMR

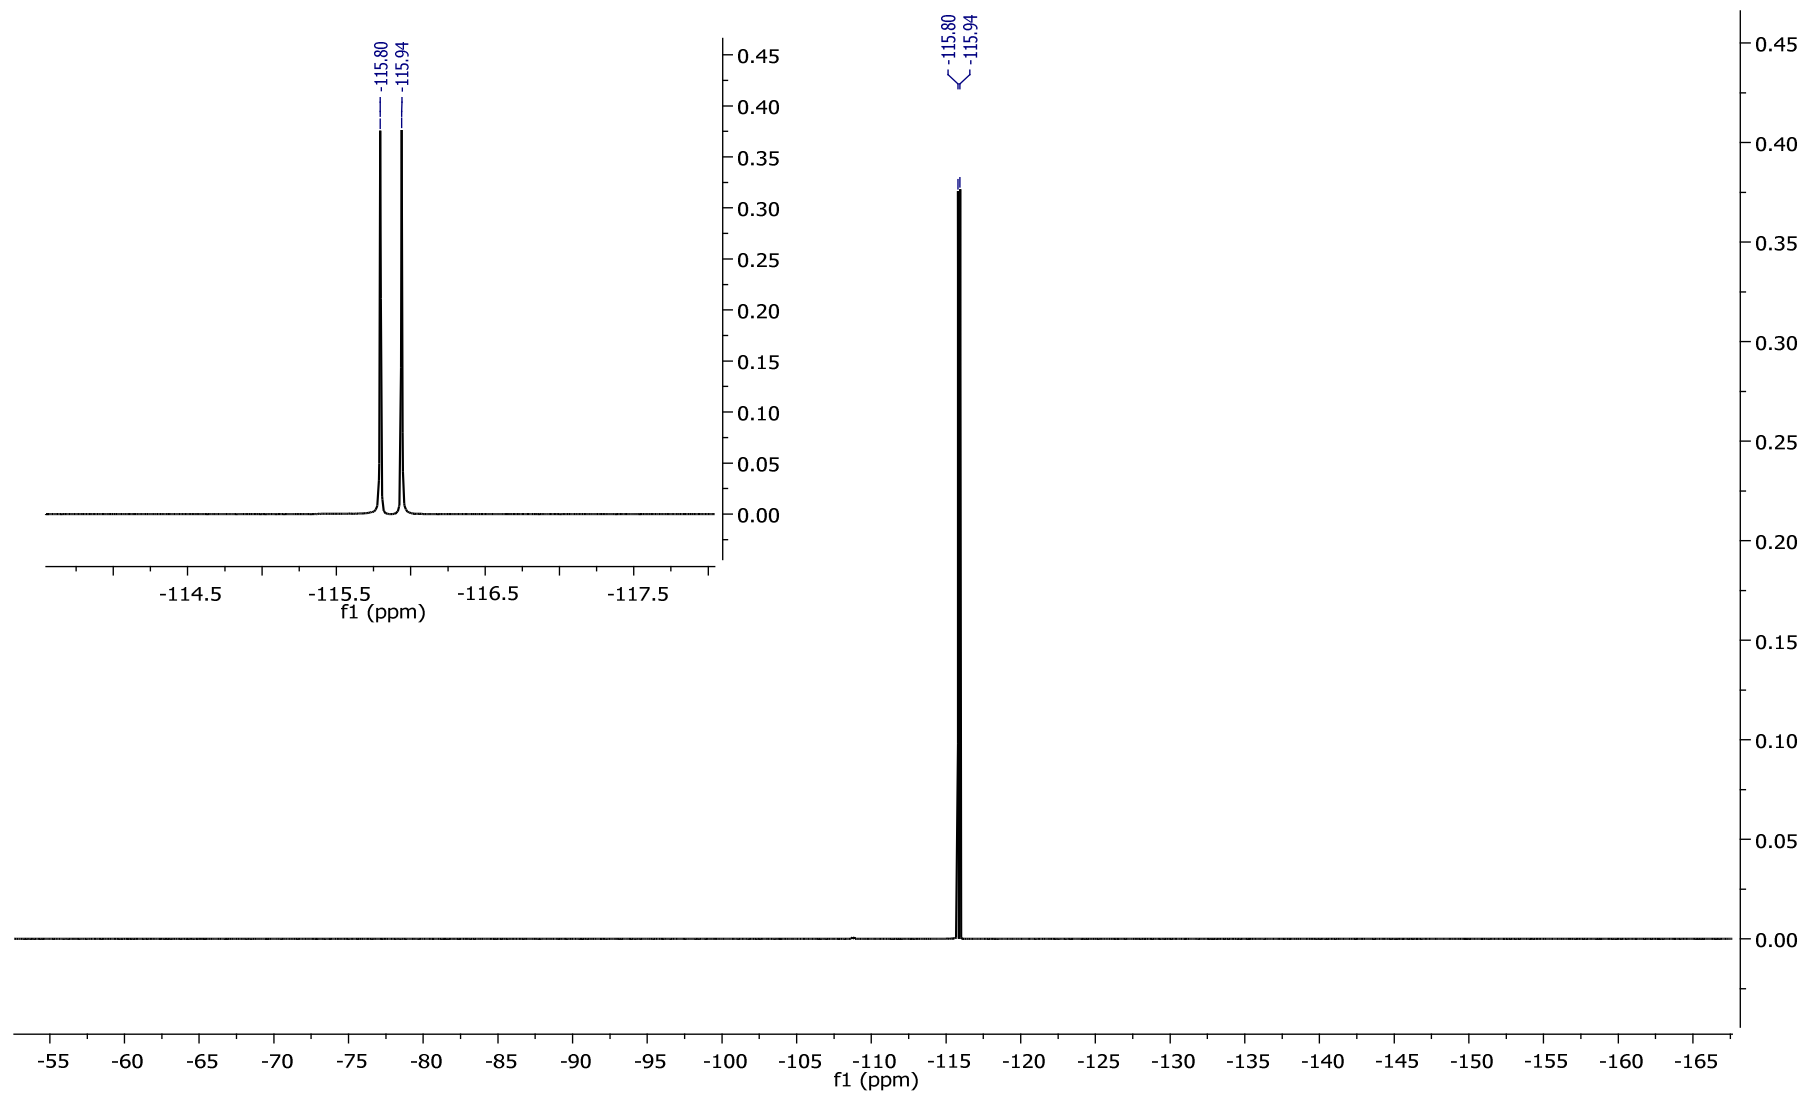

$^{31}\text{P}$  NMR

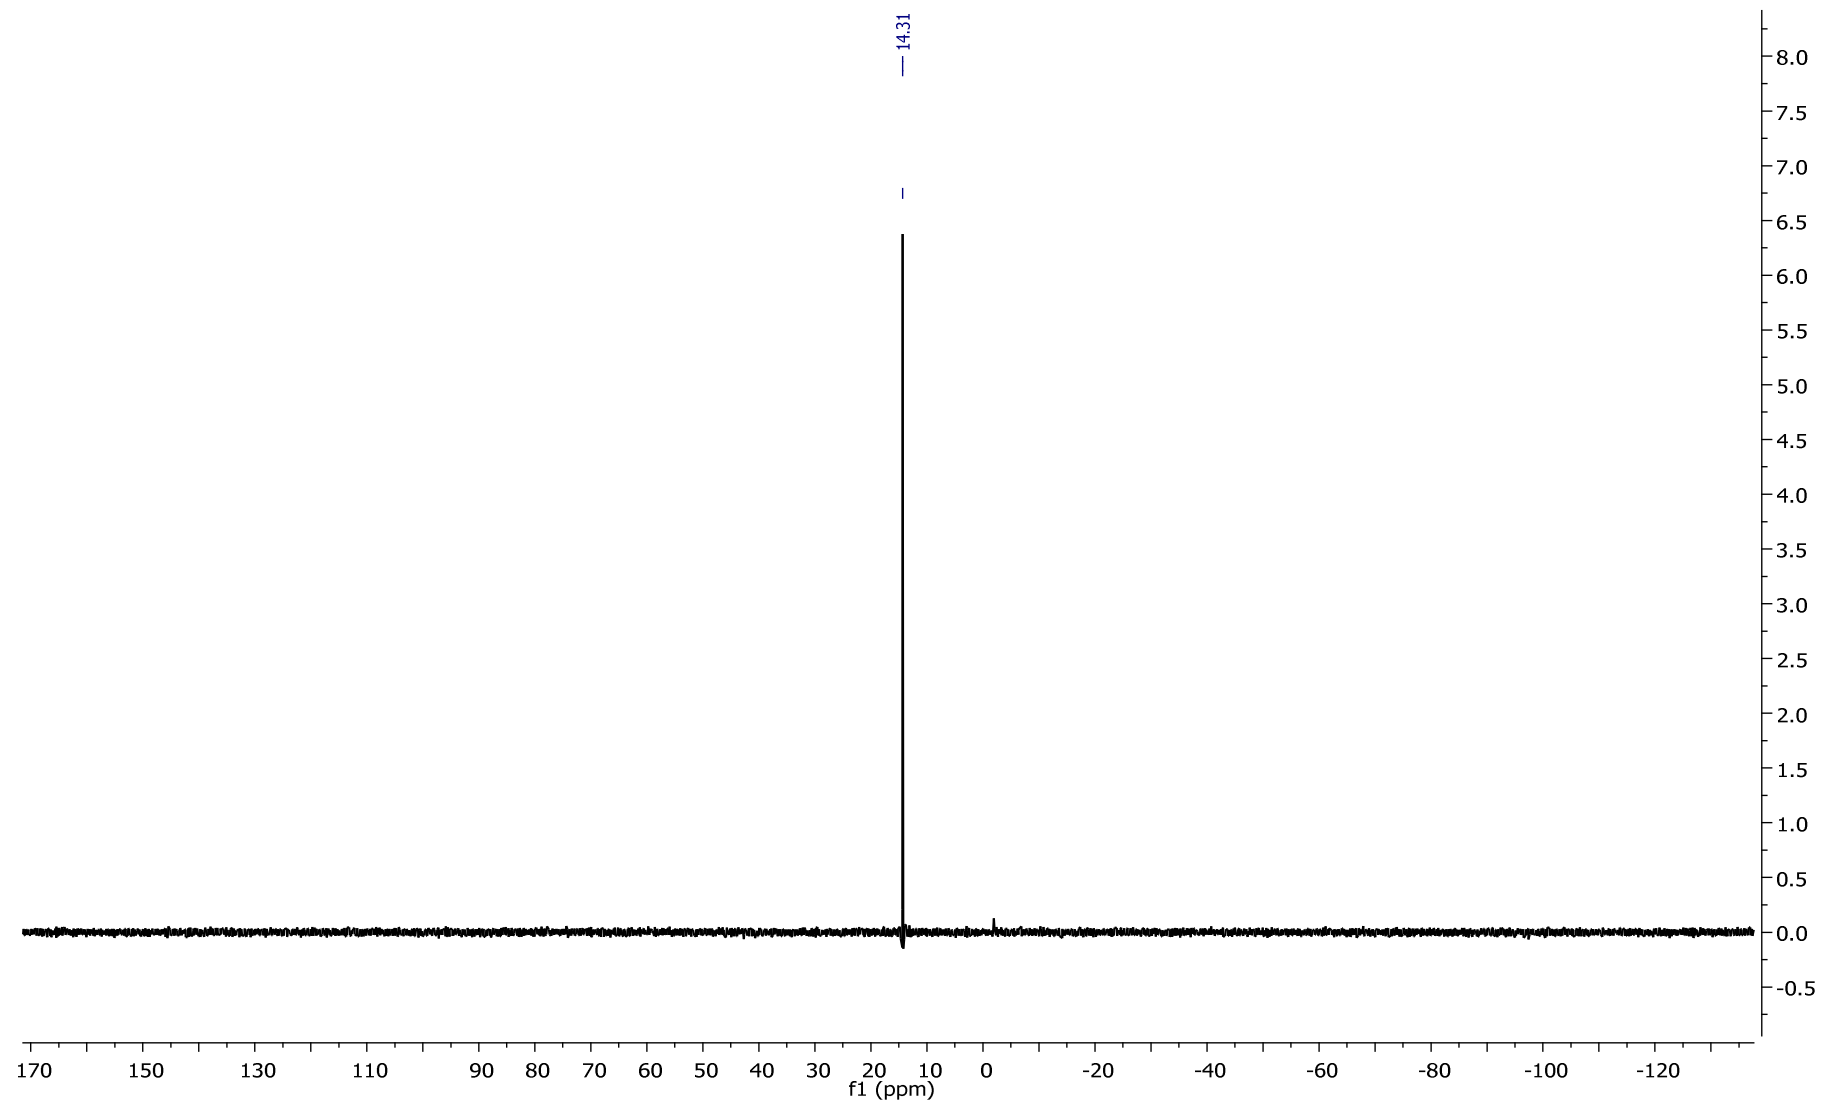

15. Diethyl (2-(difluoromethyl)-6,7-dimethoxyquinolin-3-yl)phosphonate **4o**

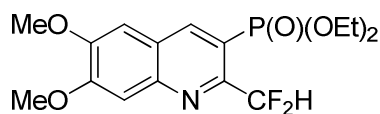

Yellowish crystals (42%); Mp = 169–173 °C;  $^1\text{H}$  NMR (400 MHz,  $\text{CDCl}_3$ )  $\delta$  1.33 (t,  $J = 7.1$  Hz, 6H), 4.02 (s, 3H), 4.04 (s, 3H), 4.09 (m, 2H), 4.18 (m, 2H), 7.12 (s, 1H), 7.29 (t,  $^2J_{\text{H-F}} = 54.0$  Hz, 1H), 7.56 (s, 1H), 8.69 (d,  $^3J_{\text{H-P}} = 14.9$  Hz, 1H);  $^{13}\text{C}$  NMR (100 MHz)  $\delta$  16.3 (d,  $J = 6.4$  Hz), 56.4, 56.6, 62.9 (d,  $J = 5.3$  Hz), 105.4, 108.3, 110.8 (t,  $^1J_{\text{C-F}} = 239.6$  Hz), 117.9 (dt,  $^1J_{\text{C-P}} = 184.9$  Hz,  $^3J_{\text{C-F}} = 3.4$  Hz), 123.3 (dt,  $^3J_{\text{C-P}} = 11.7$  Hz,  $^5J_{\text{C-F}} = 0.8$  Hz), 142.4 (d,  $^2J_{\text{C-P}} = 6.6$  Hz), 146.9, 149.7 (td,  $^2J_{\text{C-F}} = 20.6$  Hz,  $^2J_{\text{C-P}} = 11.2$  Hz), 151.7, 155.2;  $^{19}\text{F}$  NMR (376 MHz)  $\delta$  -115.2 (d,  $^2J_{\text{F-H}} = 50.5$  Hz);  $^{31}\text{P}$  NMR (161 MHz)  $\delta$  14.3 (t,  $^4J_{\text{P-F}} = 1.3$  Hz); HRMS (ESI): calcd for  $\text{C}_{16}\text{H}_{20}\text{F}_2\text{NNaO}_5\text{P}$   $[\text{M}+\text{Na}]^+$  398.0939, found 398.0949.

<sup>1</sup>H NMR

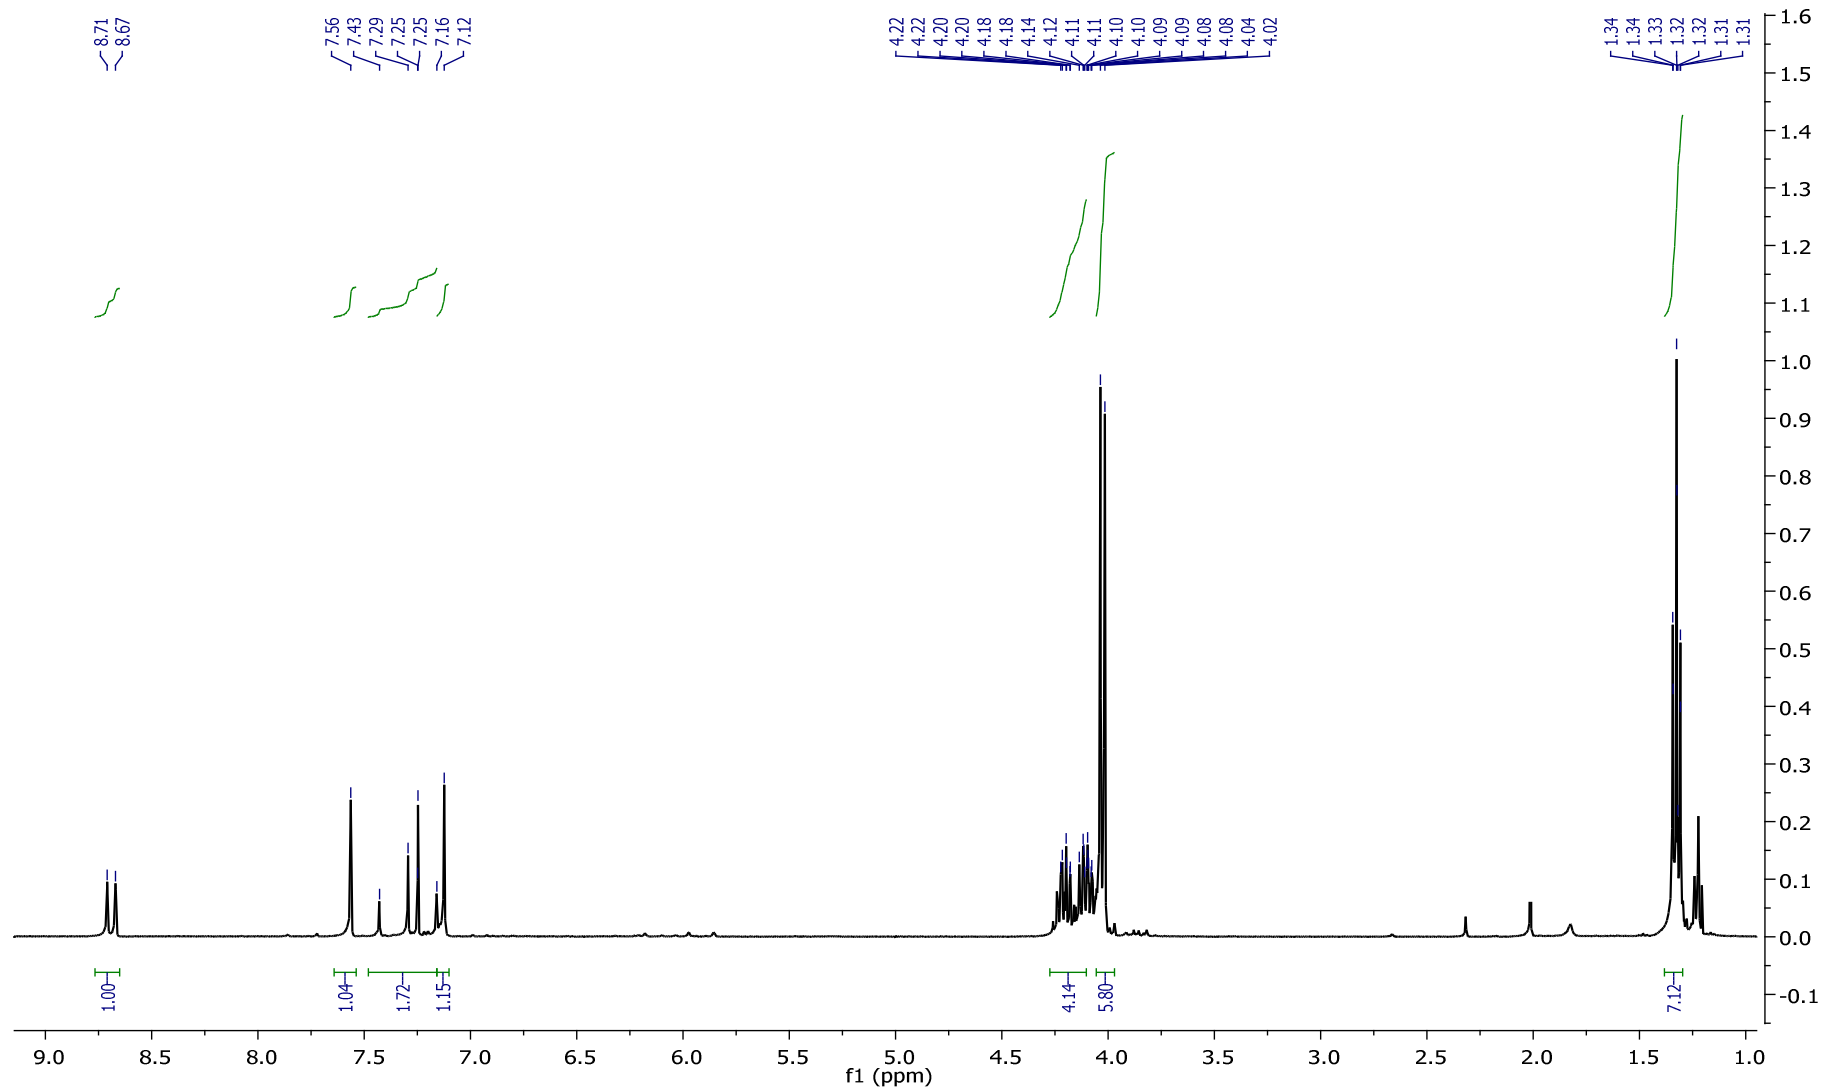

# $^{13}\text{C}$ NMR

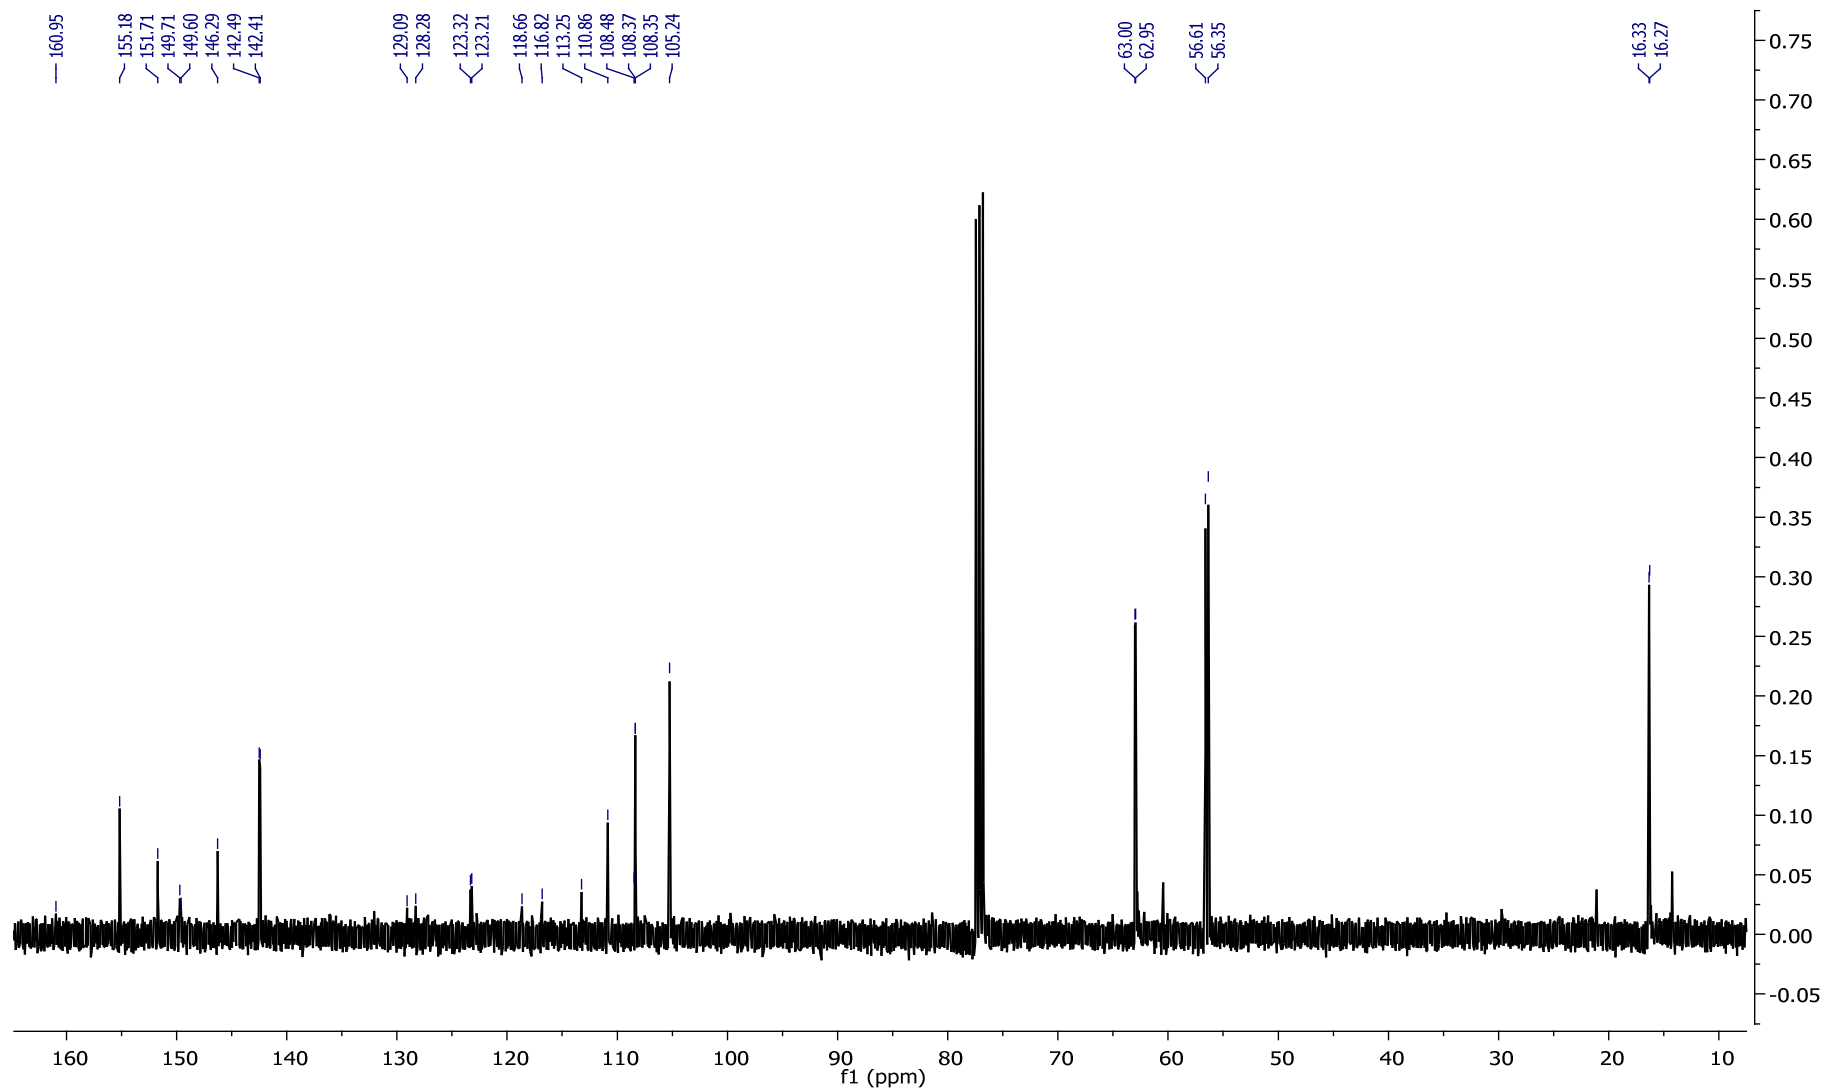

$^{19}\text{F}$  NMR

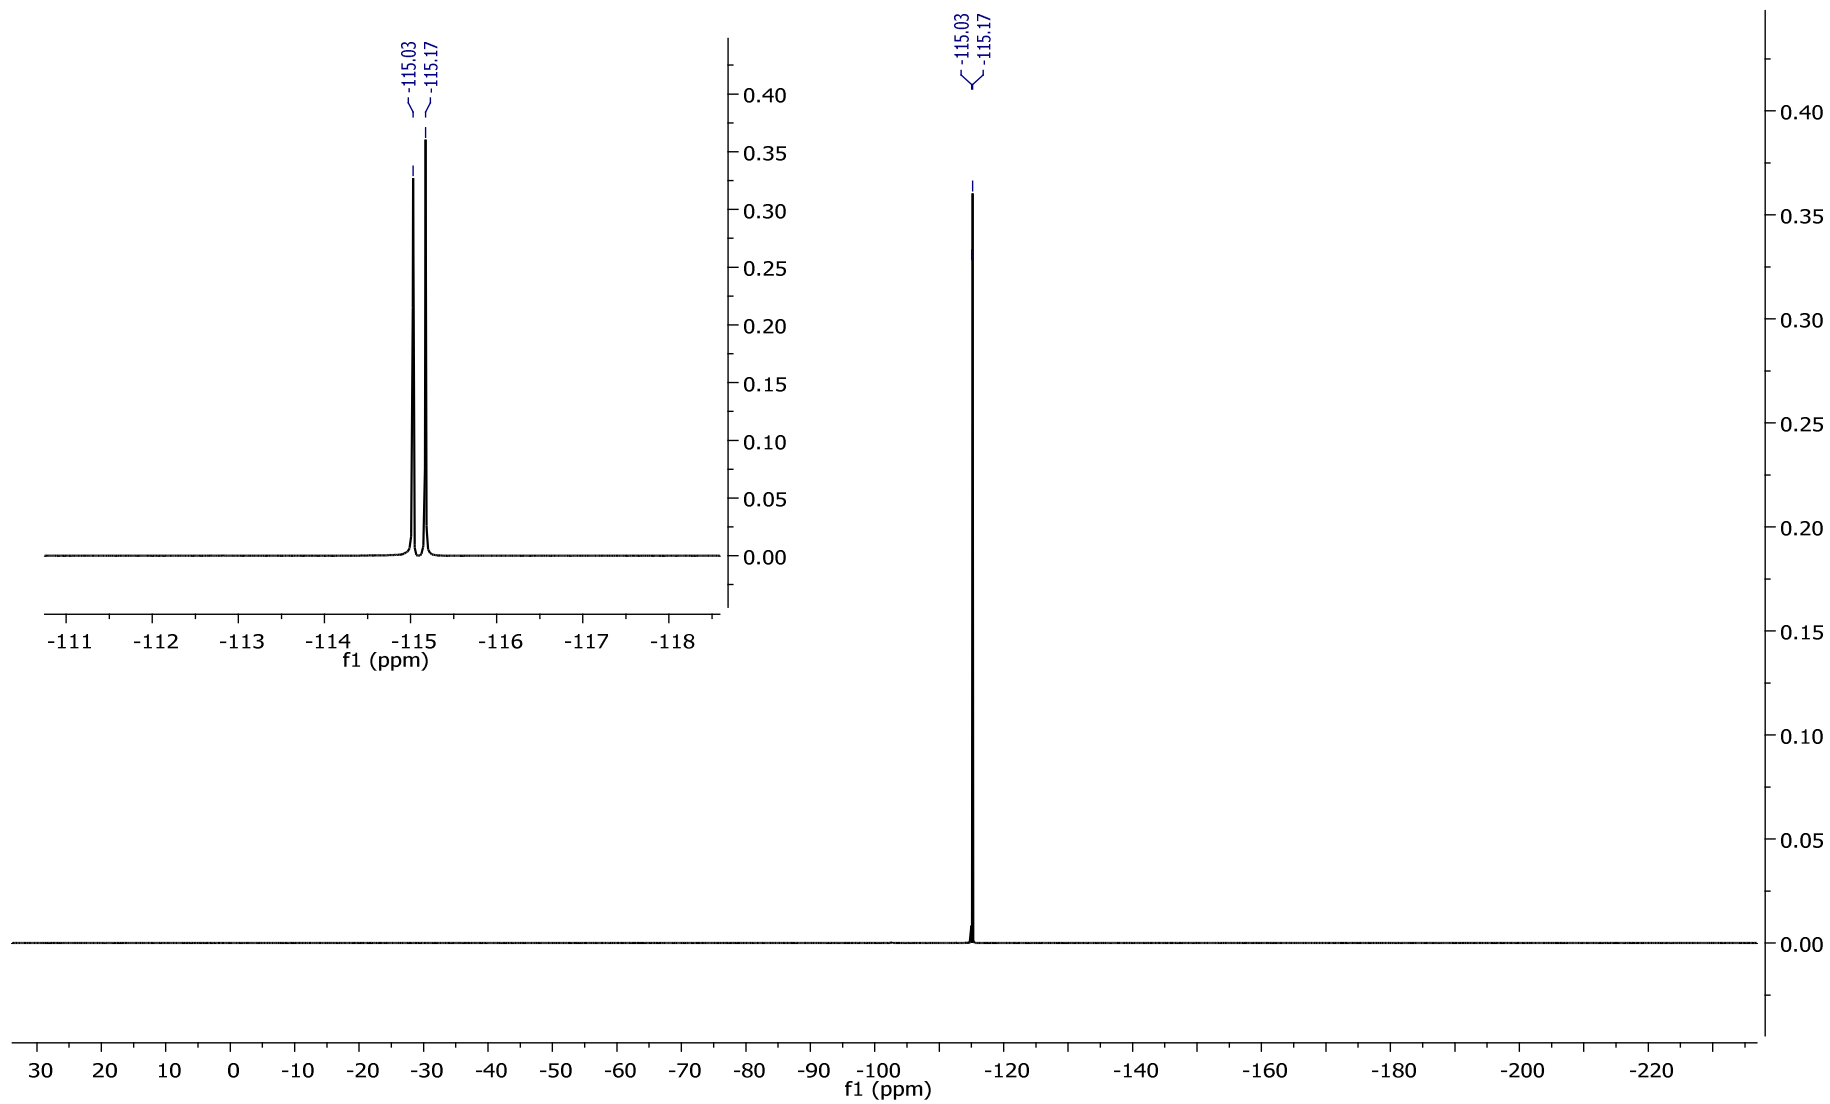

$^{31}\text{P}$  NMR

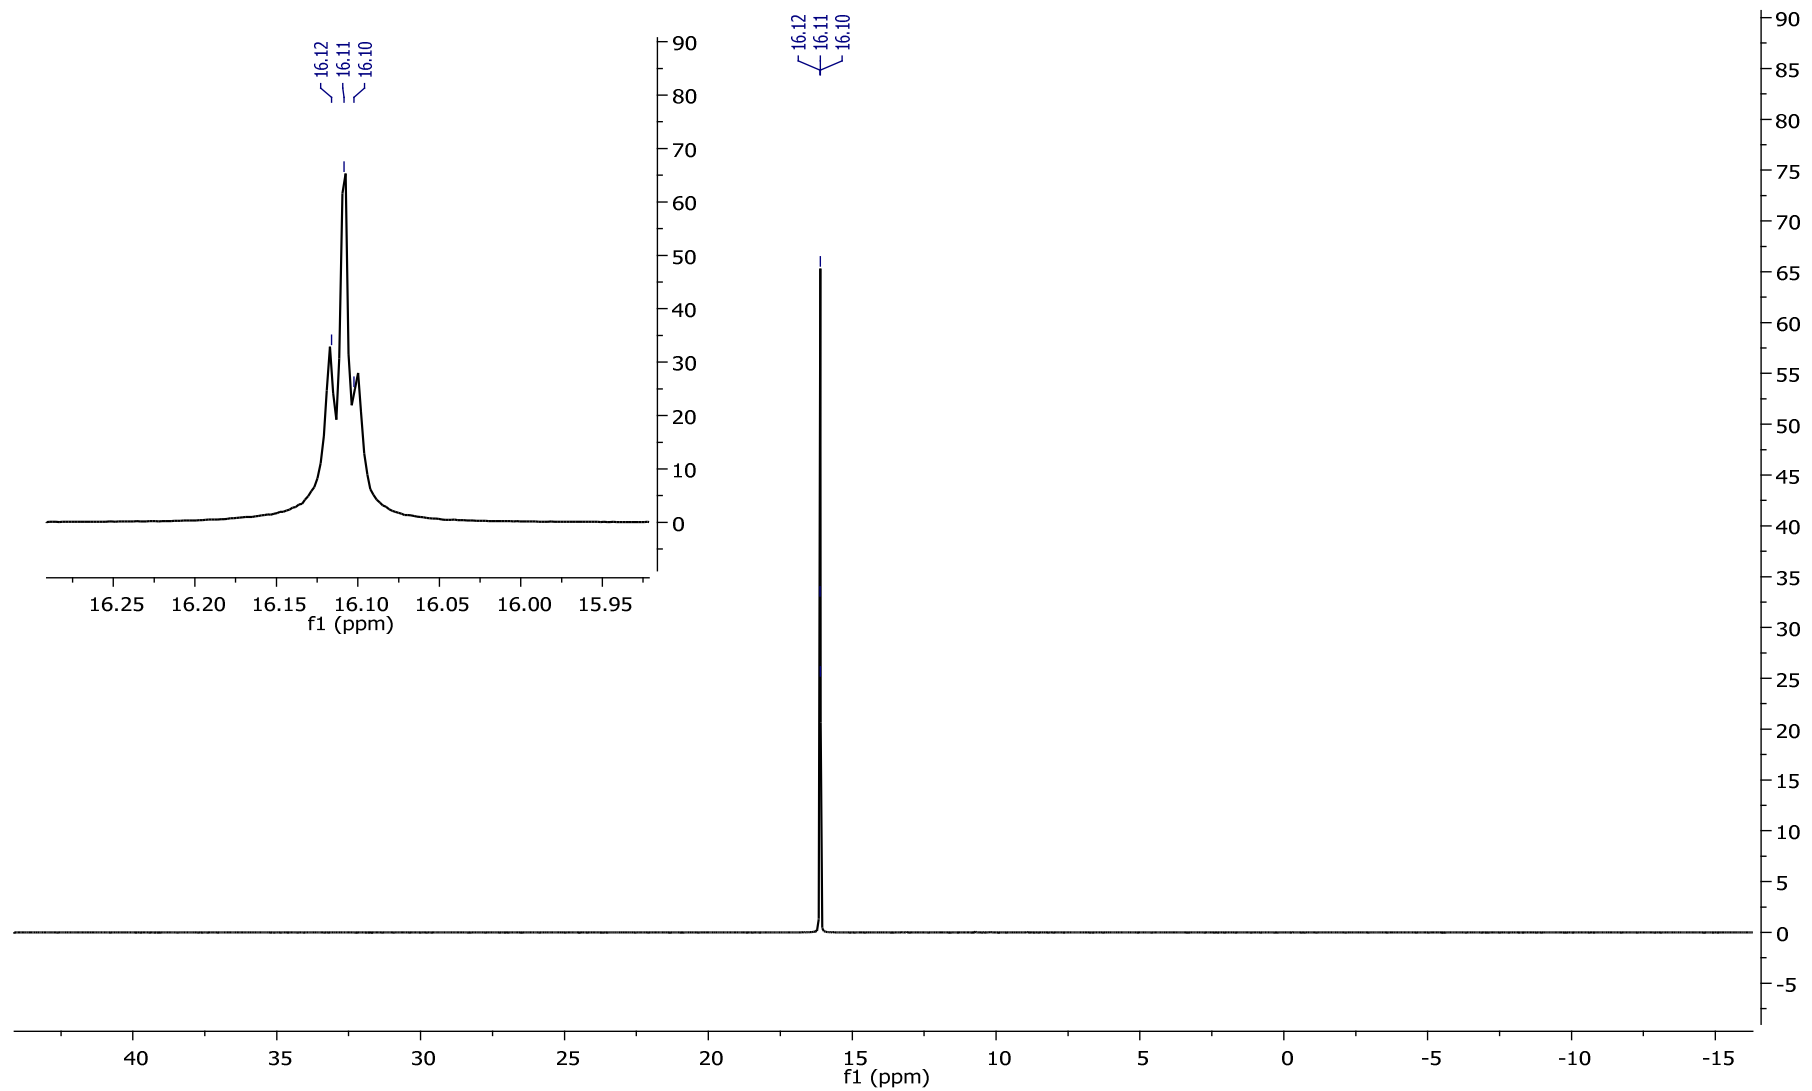



16. Diethyl (2-(difluoromethyl)-7-(trifluoromethyl)quinolin-3-yl)phosphonate **4p**

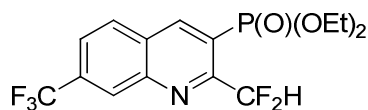

Brownish oil (69%);  $^1\text{H}$  NMR (400 MHz,  $\text{CDCl}_3$ )  $\delta$  1.37 (t,  $J = 7.0$  Hz, 6H), 4.17 (m, 2H), 4.27 (m, 2H), 7.33 (t,  $^2J_{\text{H-F}} = 53.3$  Hz, 1H), 7.89 (dd,  $J = 8.5$  Hz,  $J = 1.7$  Hz, 1H), 8.11 (d,  $J = 8.4$  Hz, 1H), 8.62 (s, 1H), 9.00 (d,  $^3J_{\text{H-P}} = 15.7$  Hz, 1H);  $^{13}\text{C}$  NMR (100 MHz)  $\delta$  16.4 (d,  $J = 6.3$  Hz), 63.5 (d,  $J = 5.8$  Hz), 110.6 (td,  $^1J_{\text{C-F}} = 242.0$  Hz,  $^3J_{\text{C-P}} = 2.0$  Hz), 122.6 (dt,  $^1J_{\text{C-P}} = 183.1$  Hz,  $^3J_{\text{C-F}} = 3.1$  Hz), 123.4 (q,  $^1J_{\text{C-F}} = 271.9$  Hz), 124.7 (qd,  $^4J_{\text{C-F}} = 2.1$  Hz,  $^4J_{\text{C-P}} = 1.0$  Hz), 127.9 (qd,  $^4J_{\text{C-F}} = 3.8$  Hz,  $^4J_{\text{C-P}} = 0.9$  Hz), 128.5 (d,  $^3J_{\text{C-P}} = 12.5$  Hz), 129.9, 134.3 (q,  $^2J_{\text{C-F}} = 32.6$  Hz), 147.8 (d,  $^2J_{\text{C-P}} = 7.9$  Hz), 147.6, 153.1 (td,  $^2J_{\text{C-F}} = 23.2$  Hz,  $^2J_{\text{C-P}} = 11.6$  Hz);  $^{19}\text{F}$  NMR (376 MHz)  $\delta$  -63.0 (s,  $-\text{CF}_3$ ), -116.0 (d,  $^2J_{\text{F-H}} = 52.6$  Hz,  $-\text{CF}_2\text{H}$ );  $^{31}\text{P}$  NMR (161 MHz)  $\delta$  13.8; HRMS (ESI): calcd for  $\text{C}_{15}\text{H}_{16}\text{F}_5\text{NO}_3\text{P}$   $[\text{M}+\text{H}]^+$  384.0782, found 384.0784.

# <sup>1</sup>H NMR

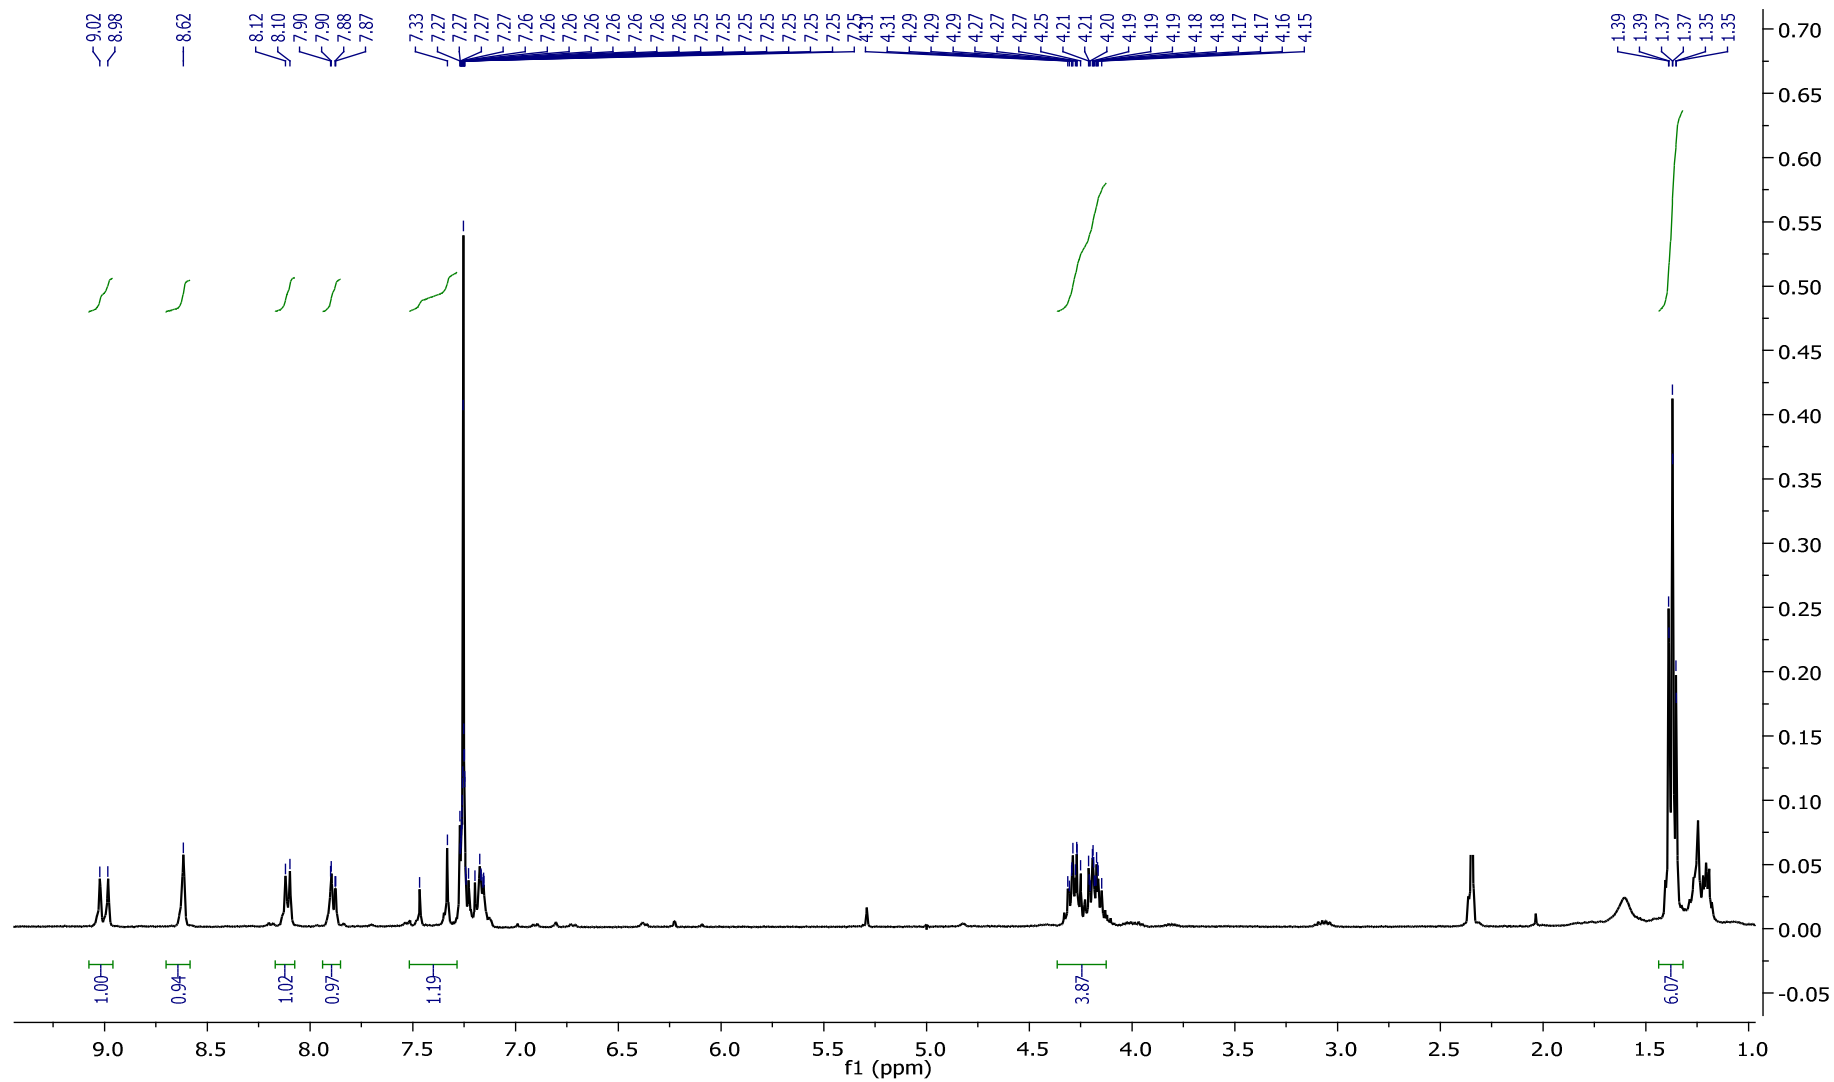

# $^{13}\text{C}$ NMR

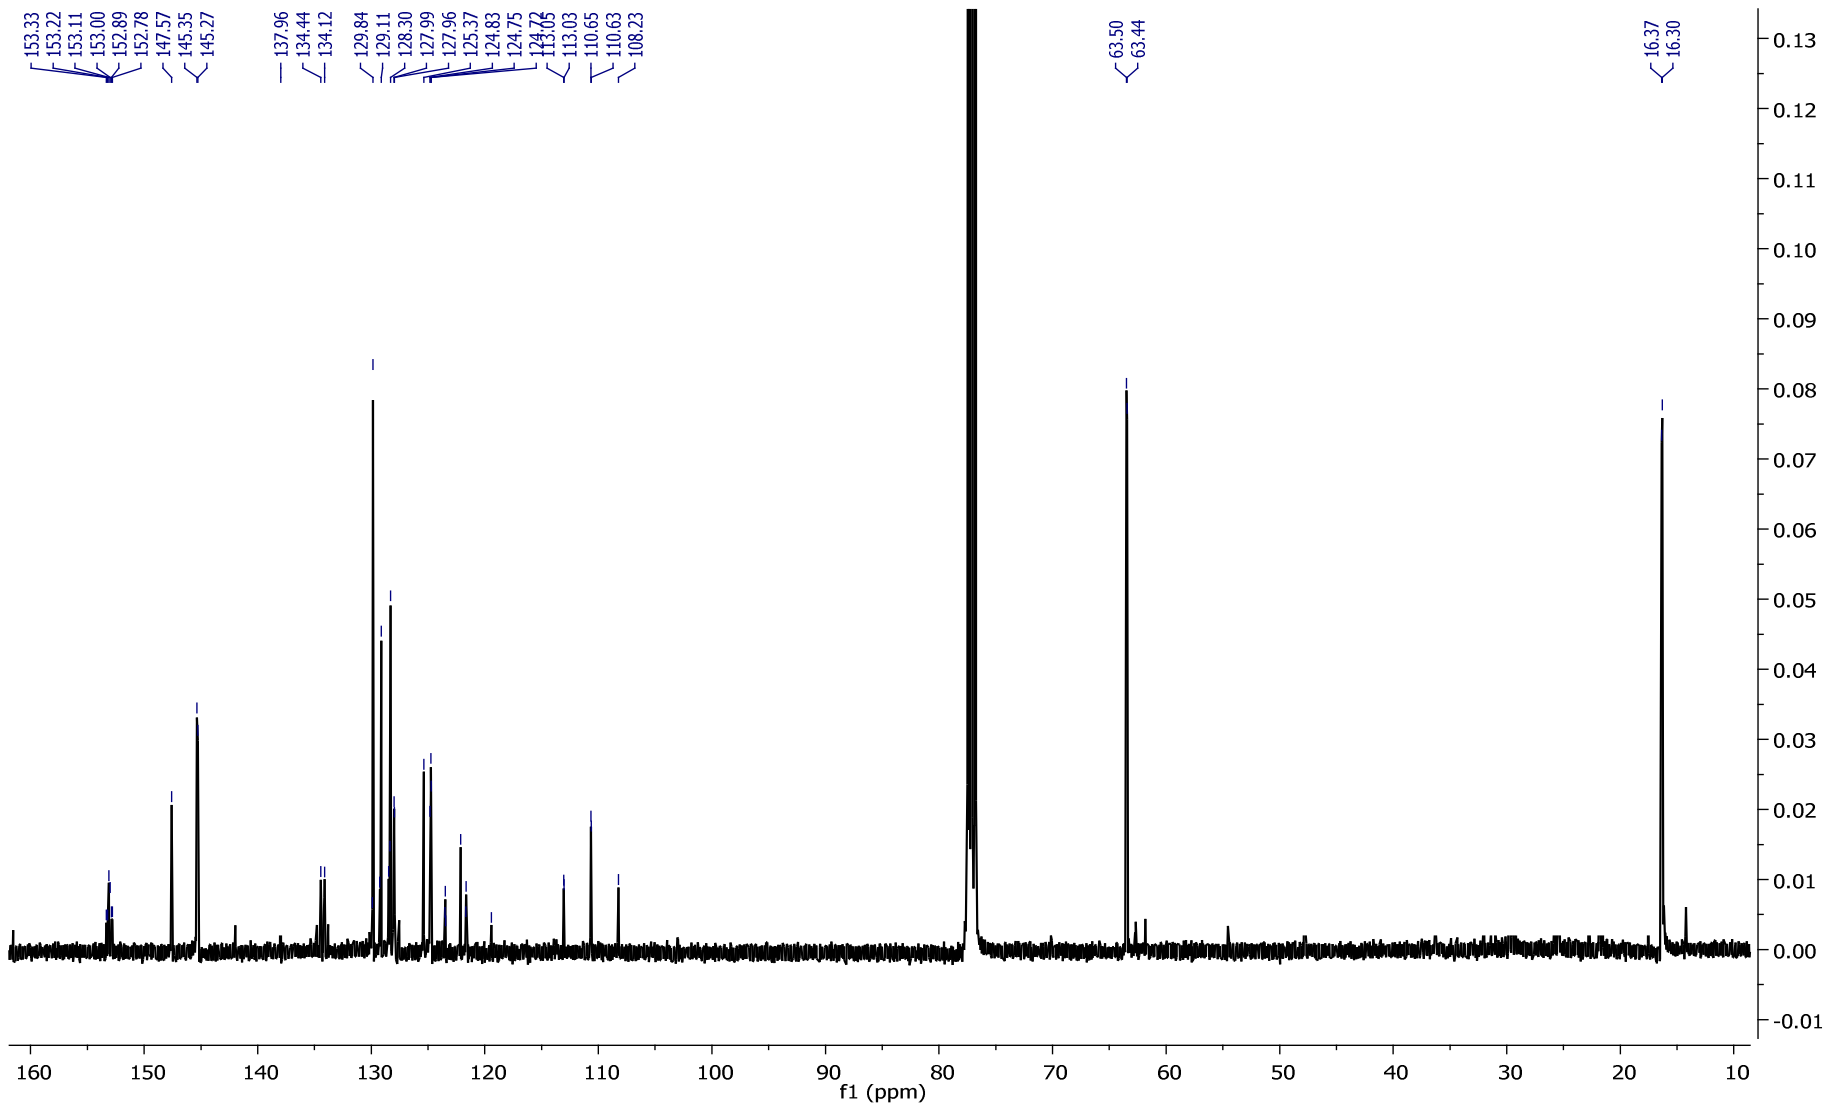

$^{19}\text{F}$  NMR

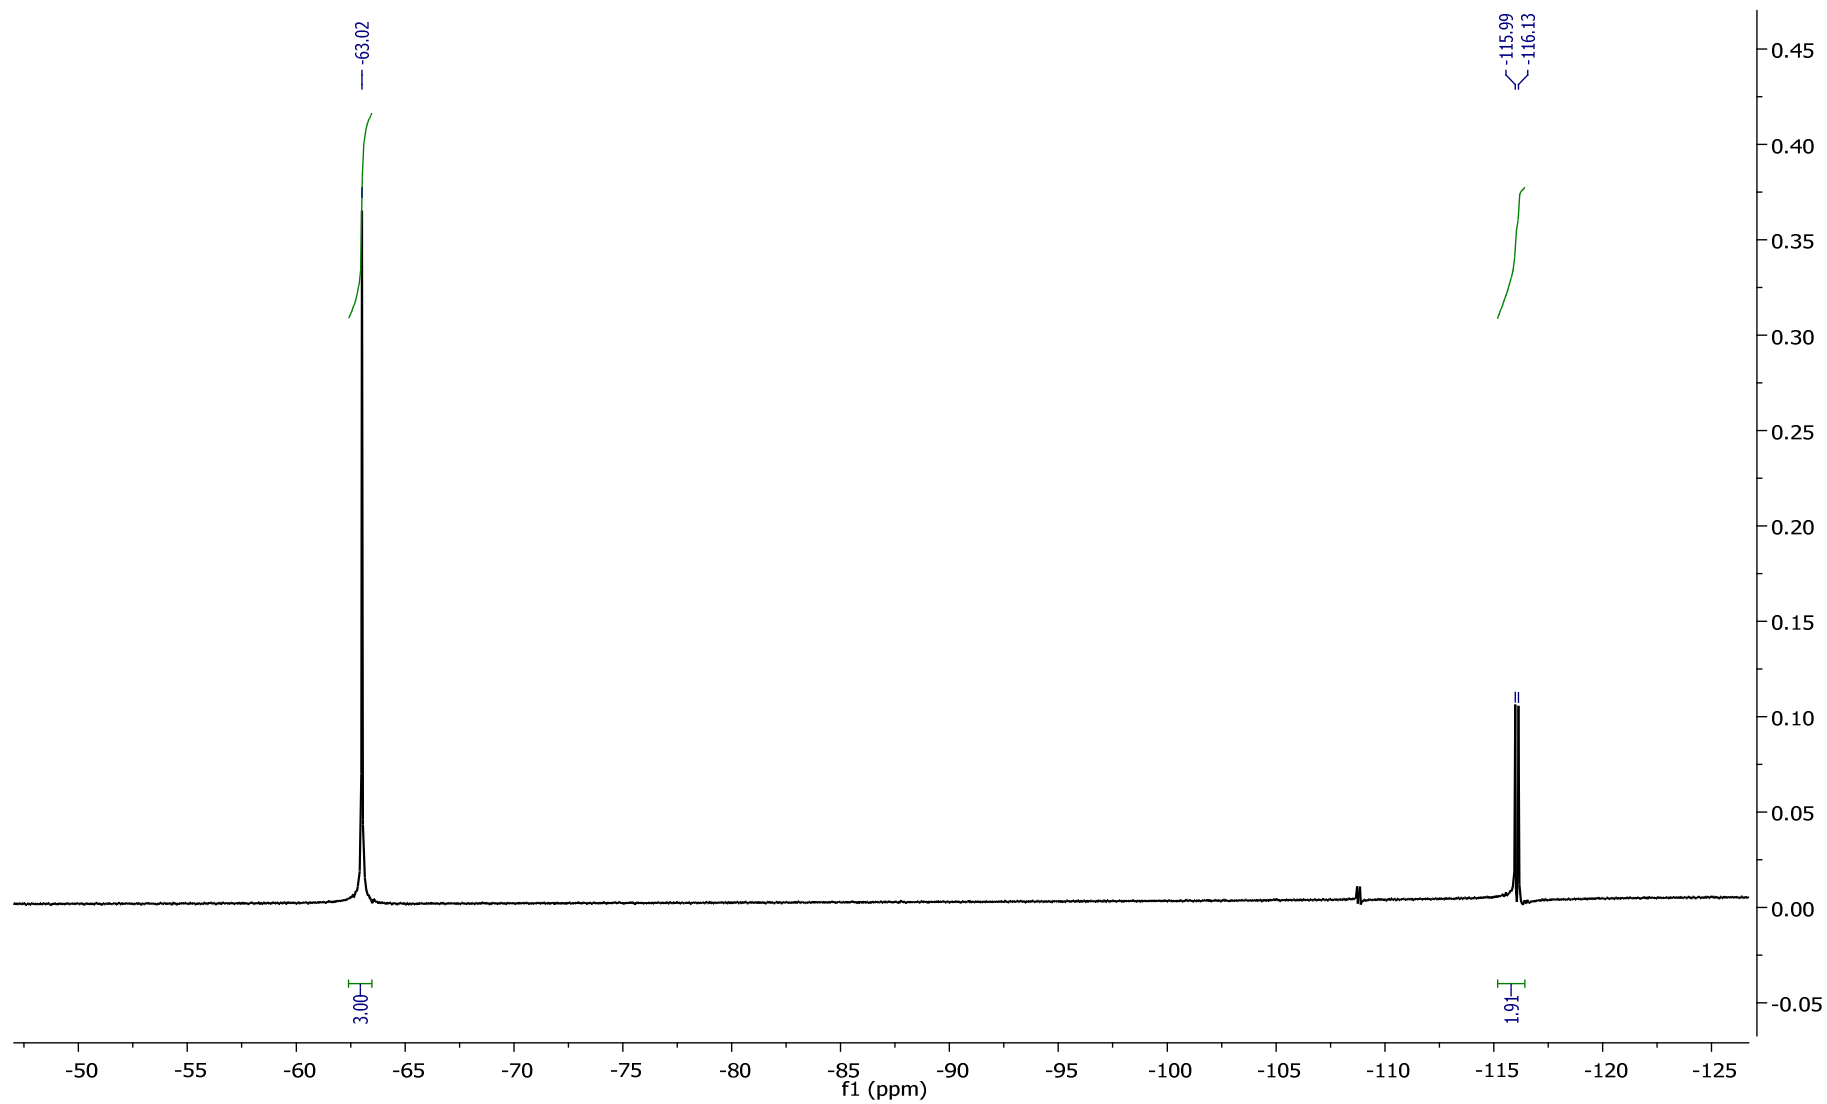

$^{31}\text{P}$  NMR

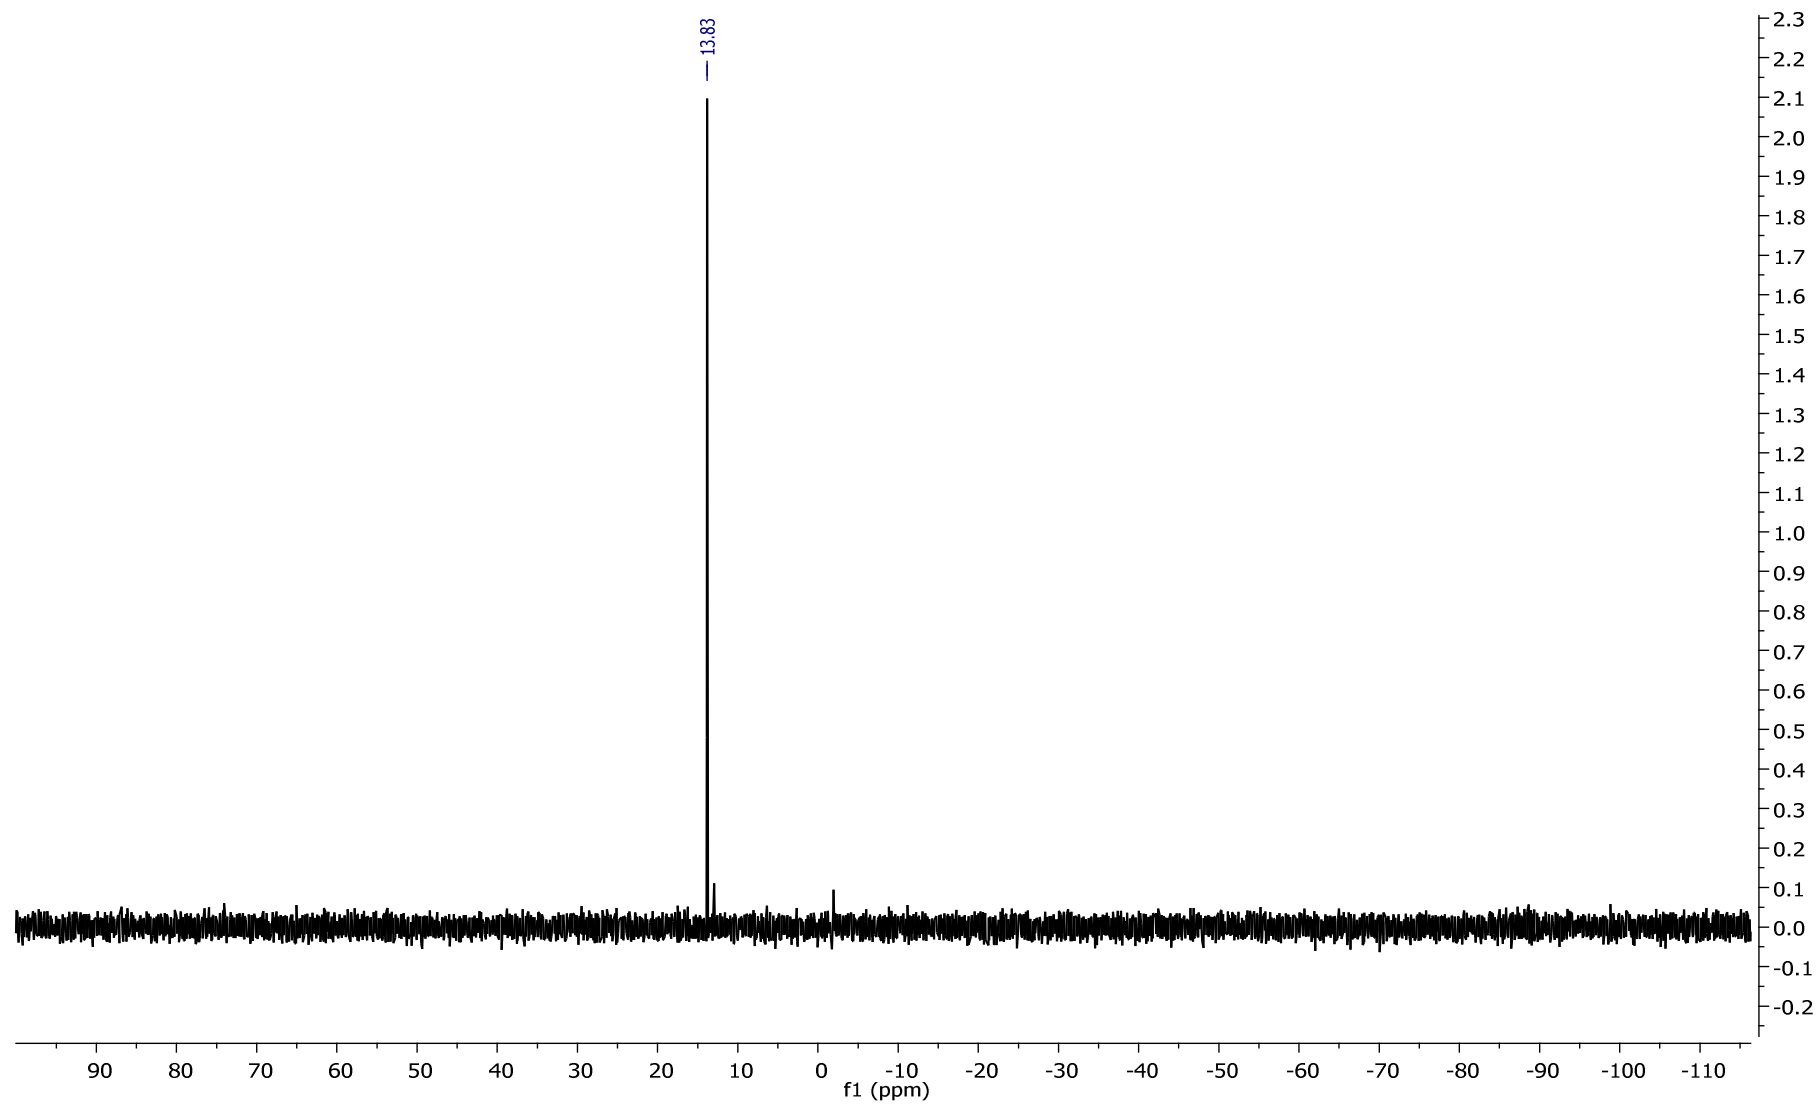

17. Diethyl (2-(perfluoroethyl)quinolin-3-yl)phosphonate **4q**

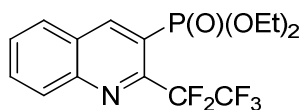

Yellowish oil (65%);  $^1\text{H}$  NMR (400 MHz,  $\text{CDCl}_3$ )  $\delta$  1.35 (t,  $J = 7.0$  Hz, 6H), 4.15 (m, 2H), 4.25 (m, 2H), 7.74 (t,  $J = 7.5$  Hz, 1H), 7.91 (td,  $J = 7.2$  Hz,  $J = 1.3$  Hz, 1H), 7.98 (d,  $J = 8.4$  Hz, 1H), 8.19 (d,  $J = 8.4$  Hz, 1H), 9.20 (d,  $^3J_{\text{H-P}} = 16.5$  Hz, 1H);  $^{13}\text{C}$  NMR (100 MHz)  $\delta$  16.2 (d,  $J = 6.5$  Hz), 63.1 (d,  $J = 6.2$  Hz), 112.0 (tq,  $^1J_{\text{C-F}} = 258.8$  Hz,  $^2J_{\text{C-F}} = 34.1$  Hz), 119.0 (qt,  $^1J_{\text{C-F}} = 289.5$  Hz,  $^2J_{\text{C-F}} = 35.6$  Hz), 120.7 (d,  $^1J_{\text{C-P}} = 186.1$  Hz), 126.7 (d,  $^3J_{\text{C-P}} = 11.4$  Hz), 128.6, 129.8, 130.0 (d,  $^4J_{\text{C-P}} = 1.1$  Hz), 132.9, 146.8 (dt,  $^4J_{\text{C-P}} = 1.4$  Hz,  $^4J_{\text{C-F}} = 0.9$  Hz), 147.5 (td,  $^2J_{\text{C-F}} = 28.9$  Hz,  $^2J_{\text{C-P}} = 7.9$  Hz), 147.9 (d,  $^2J_{\text{C-P}} = 7.2$  Hz);  $^{19}\text{F}$  NMR (376 MHz)  $\delta$  -79.9 (s,  $-\text{CF}_2\text{CF}_3$ ), -108.1 (s,  $-\text{CF}_2\text{CF}_3$ );  $^{31}\text{P}$  NMR (161 MHz)  $\delta$  14.1; HRMS (ESI): calcd for  $\text{C}_{15}\text{H}_{16}\text{F}_5\text{NO}_3\text{P}$   $[\text{M}+\text{H}]^+$  384.0782, found 384.0784.

# <sup>1</sup>H NMR

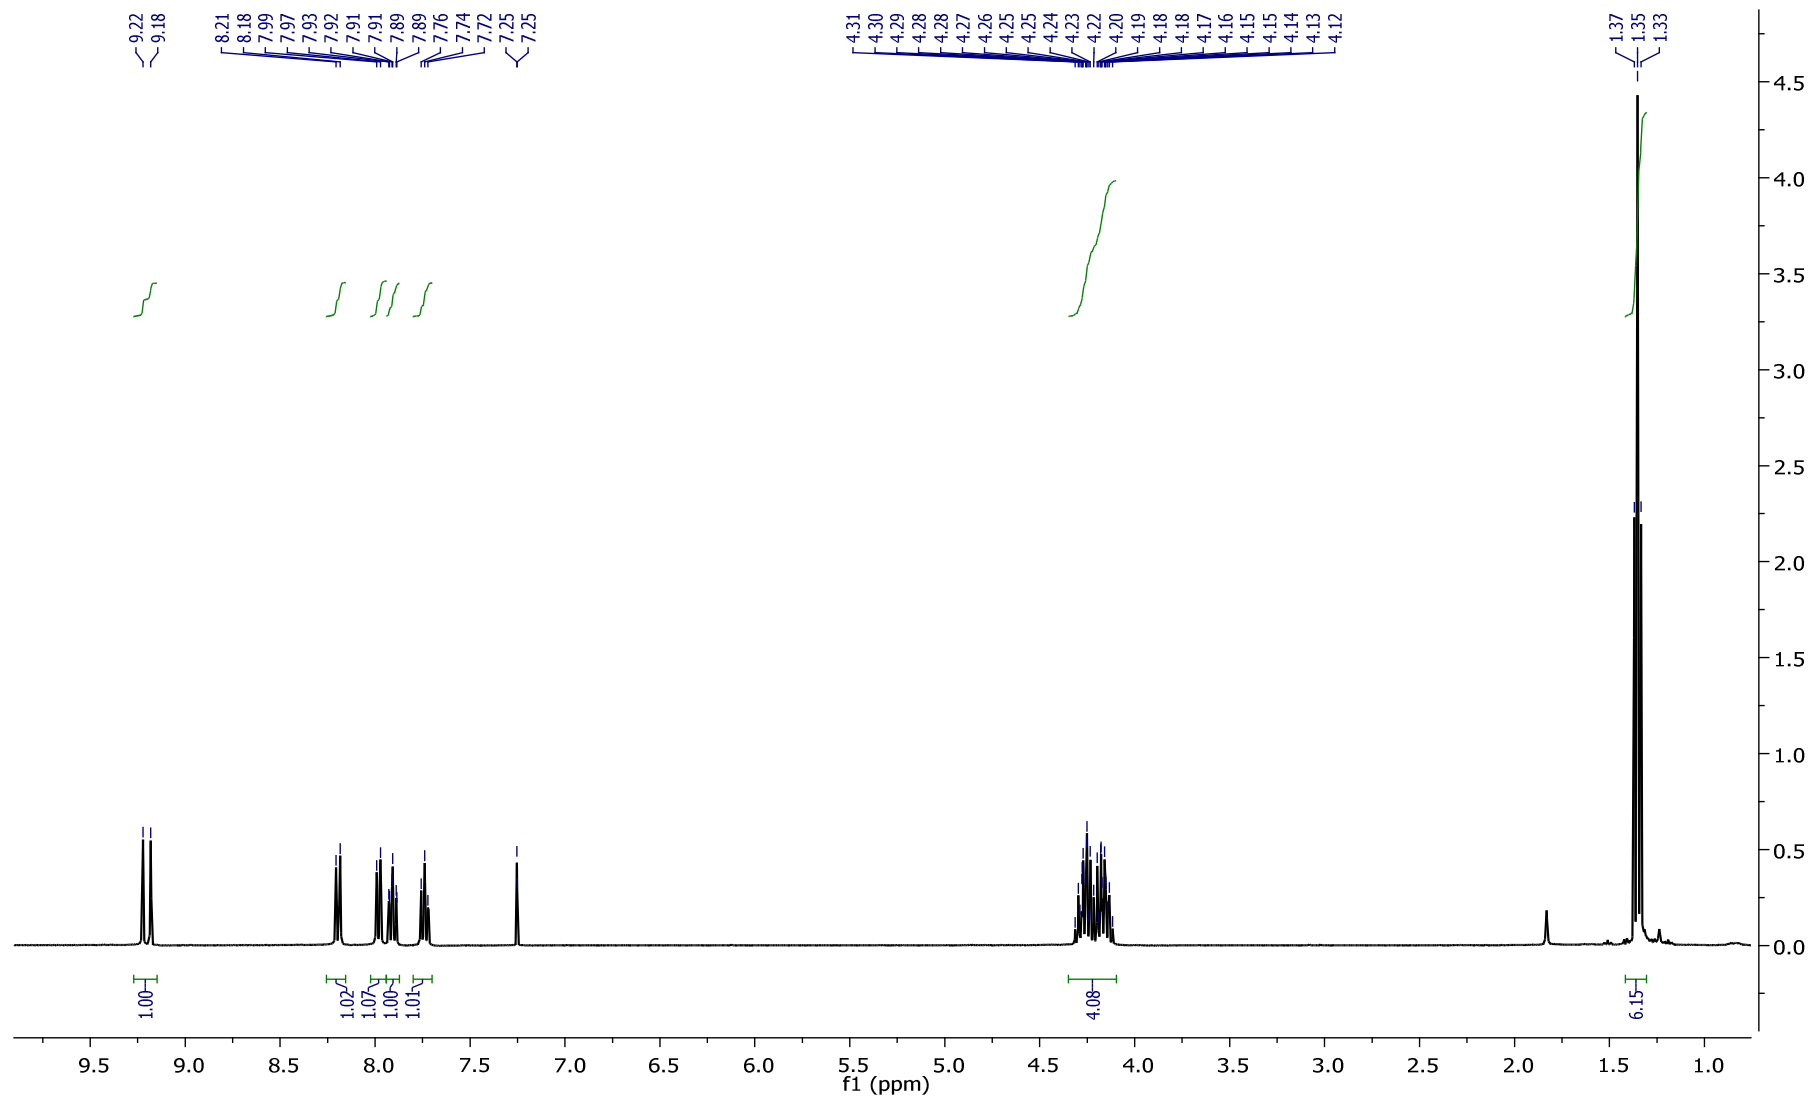

<sup>13</sup>C NMR

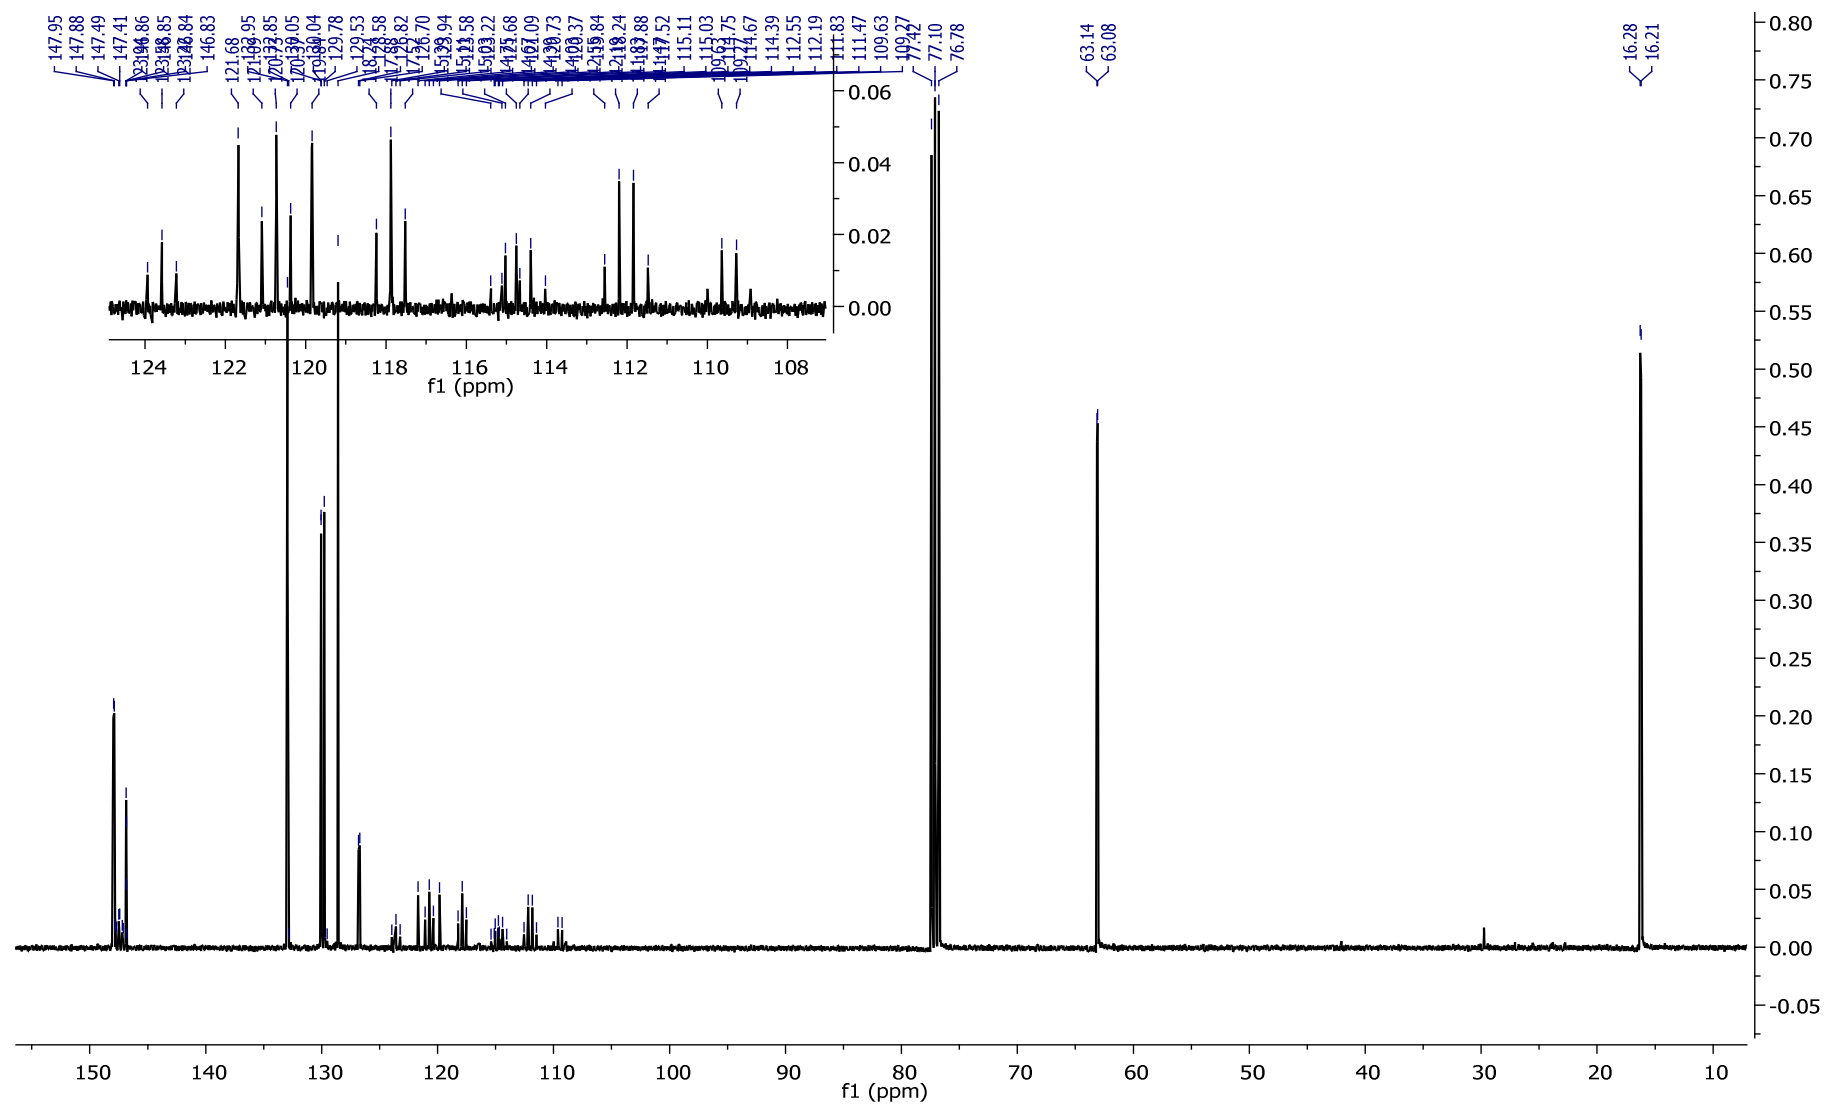



$^{19}\text{F}$  NMR

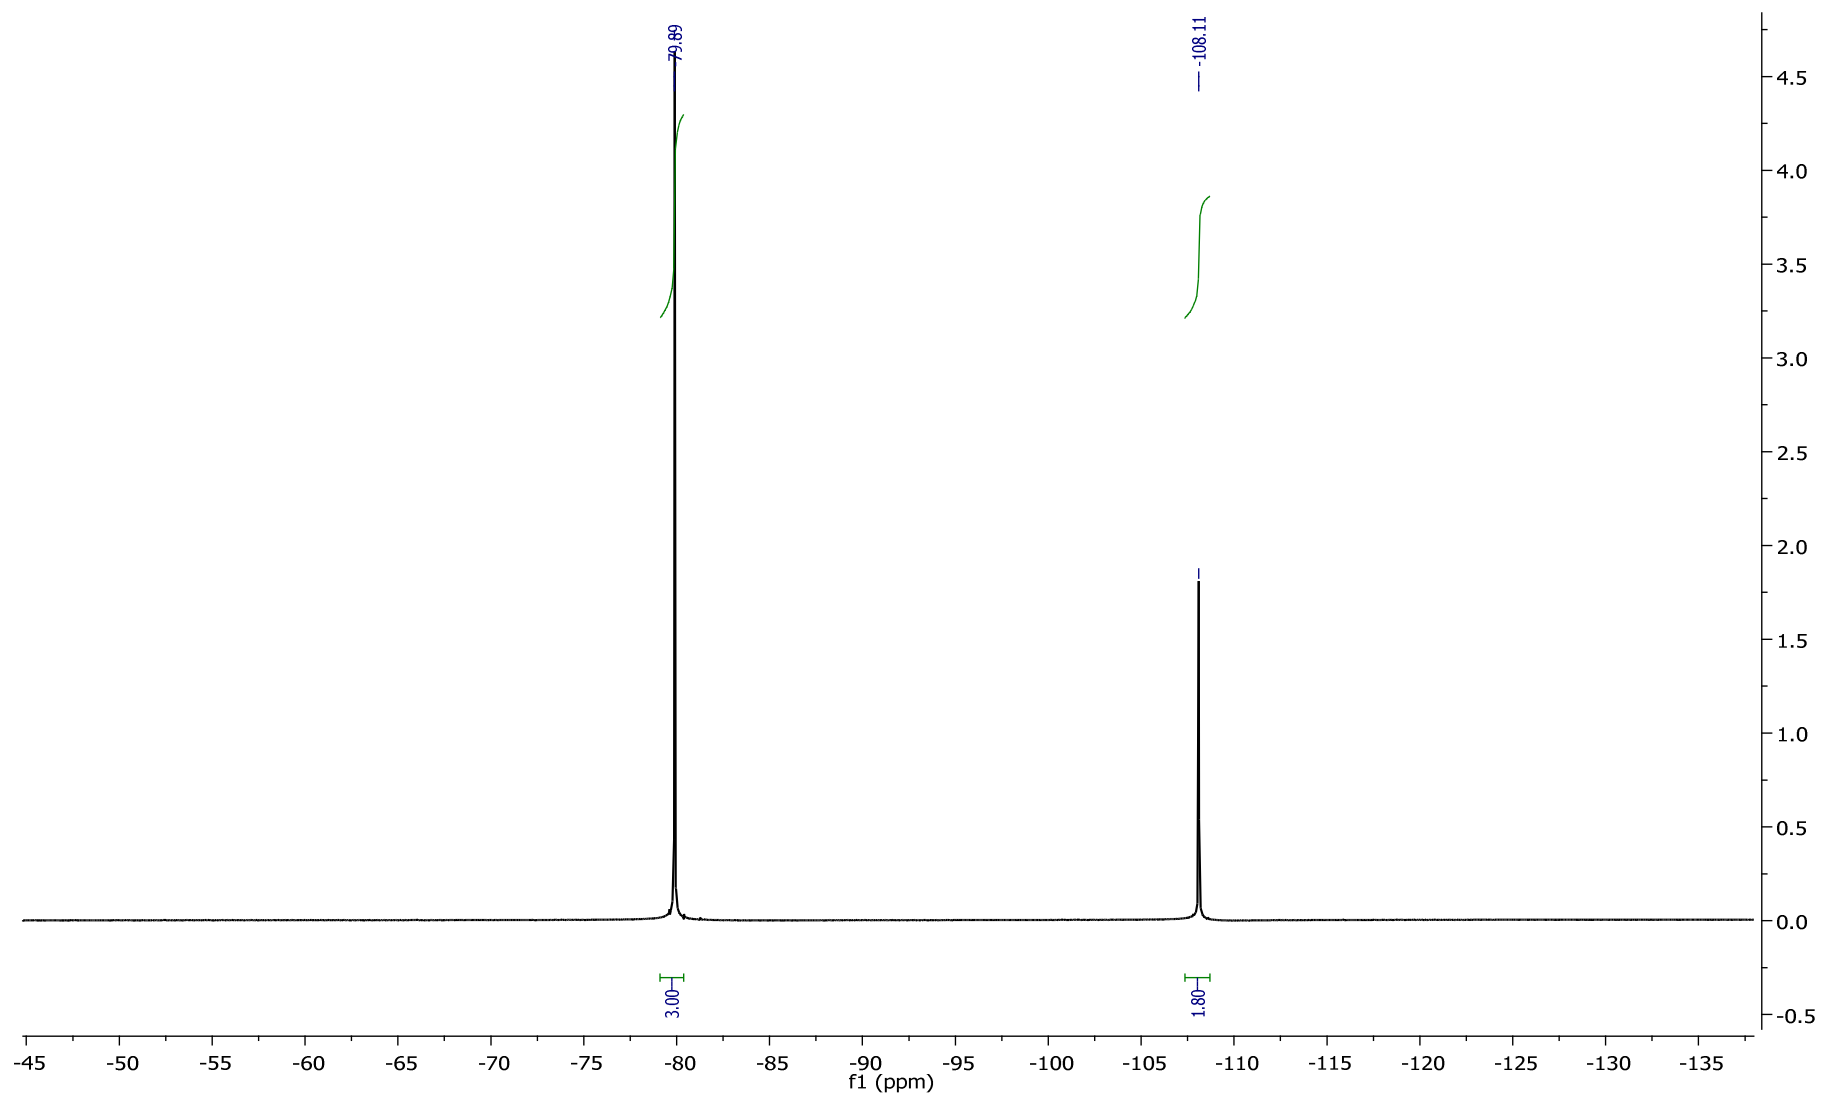

$^{31}\text{P}$  NMR

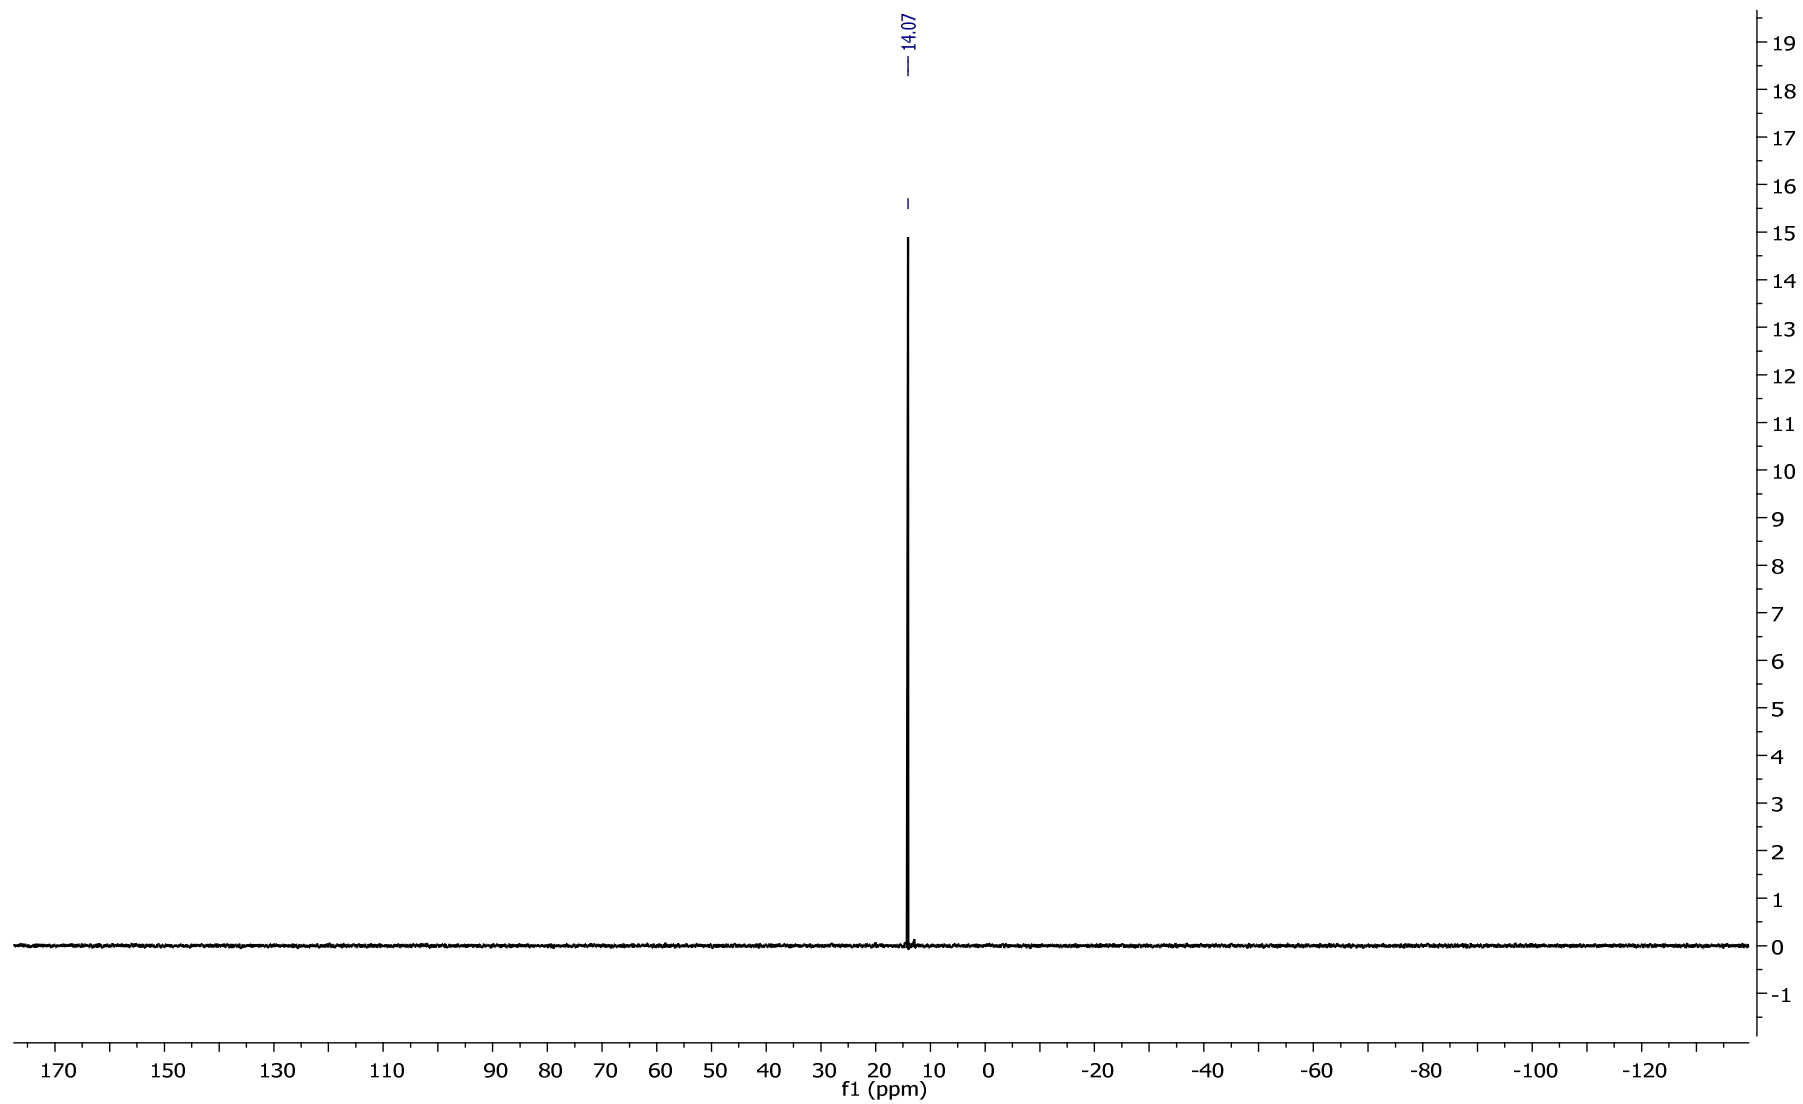

18. Diethyl (6-chloro-2-(perfluoroethyl)quinolin-3-yl)phosphonate **4r**

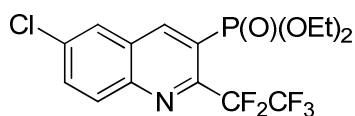

Yellowish oil (53%);  $^1\text{H}$  NMR (400 MHz,  $\text{CDCl}_3$ )  $\delta$  1.35 (t,  $J = 7.0$  Hz, 6H), 4.15 (m, 2H), 4.26 (m, 2H), 7.83 (dd,  $J = 8.9$  Hz,  $J = 2.3$  Hz, 1H), 7.96 (d,  $J = 2.2$  Hz, 1H), 8.14 (d,  $J = 8.9$  Hz, 1H), 9.11 (d,  $^3J_{\text{H-P}} = 16.5$  Hz, 1H);  $^{13}\text{C}$  NMR (100 MHz)  $\delta$  16.3 (d,  $J = 6.2$  Hz), 63.2 (d,  $J = 6.3$  Hz), 114.5 (tq,  $^1J_{\text{C-F}} = 260.1$  Hz,  $^2J_{\text{C-F}} = 34.5$  Hz), 122.3 (qt,  $^1J_{\text{C-F}} = 287.0$  Hz,  $^2J_{\text{C-F}} = 36.5$  Hz), 122.5 (d,  $^1J_{\text{C-P}} = 184.8$  Hz), 127.1, 127.4 (d,  $^3J_{\text{C-P}} = 11.8$  Hz), 131.6, 133.9, 135.9, 145.2 (dt,  $^4J_{\text{C-P}} = 1.7$  Hz,  $^4J_{\text{C-F}} = 0.8$  Hz), 146.6 (td,  $^2J_{\text{C-F}} = 28.0$  Hz,  $^2J_{\text{C-P}} = 7.2$  Hz), 146.8 (d,  $^2J_{\text{C-P}} = 7.8$  Hz);  $^{19}\text{F}$  NMR (376 MHz)  $\delta$  -79.9 (s,  $-\text{CF}_2\text{CF}_3$ ), -108.1 (s,  $-\text{CF}_2\text{CF}_3$ );  $^{31}\text{P}$  NMR (161 MHz)  $\delta$  13.4; HRMS (ESI): calcd for  $\text{C}_{15}\text{H}_{14}\text{ClF}_5\text{NNaO}_3\text{P}$   $[\text{M}+\text{Na}]^+$  440.0212, found 440.0216.

# <sup>1</sup>H NMR

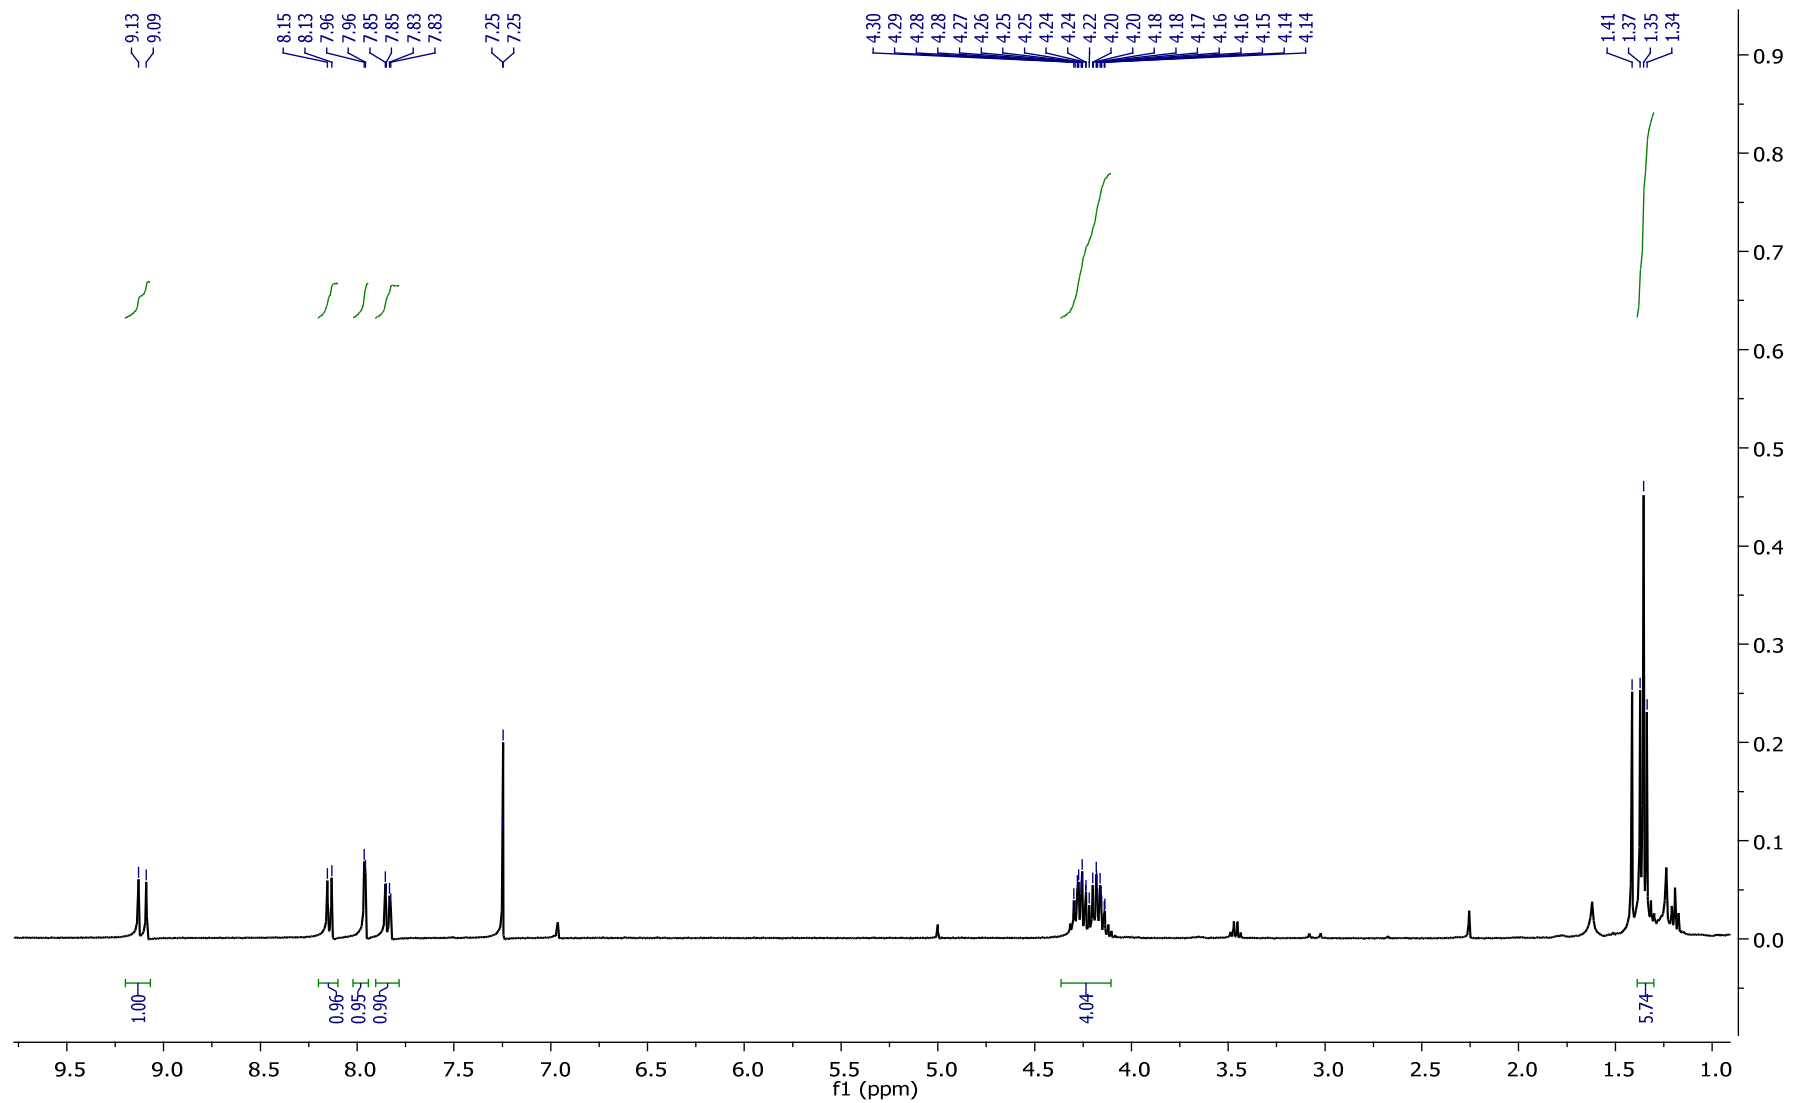

$^{13}\text{C}$  NMR

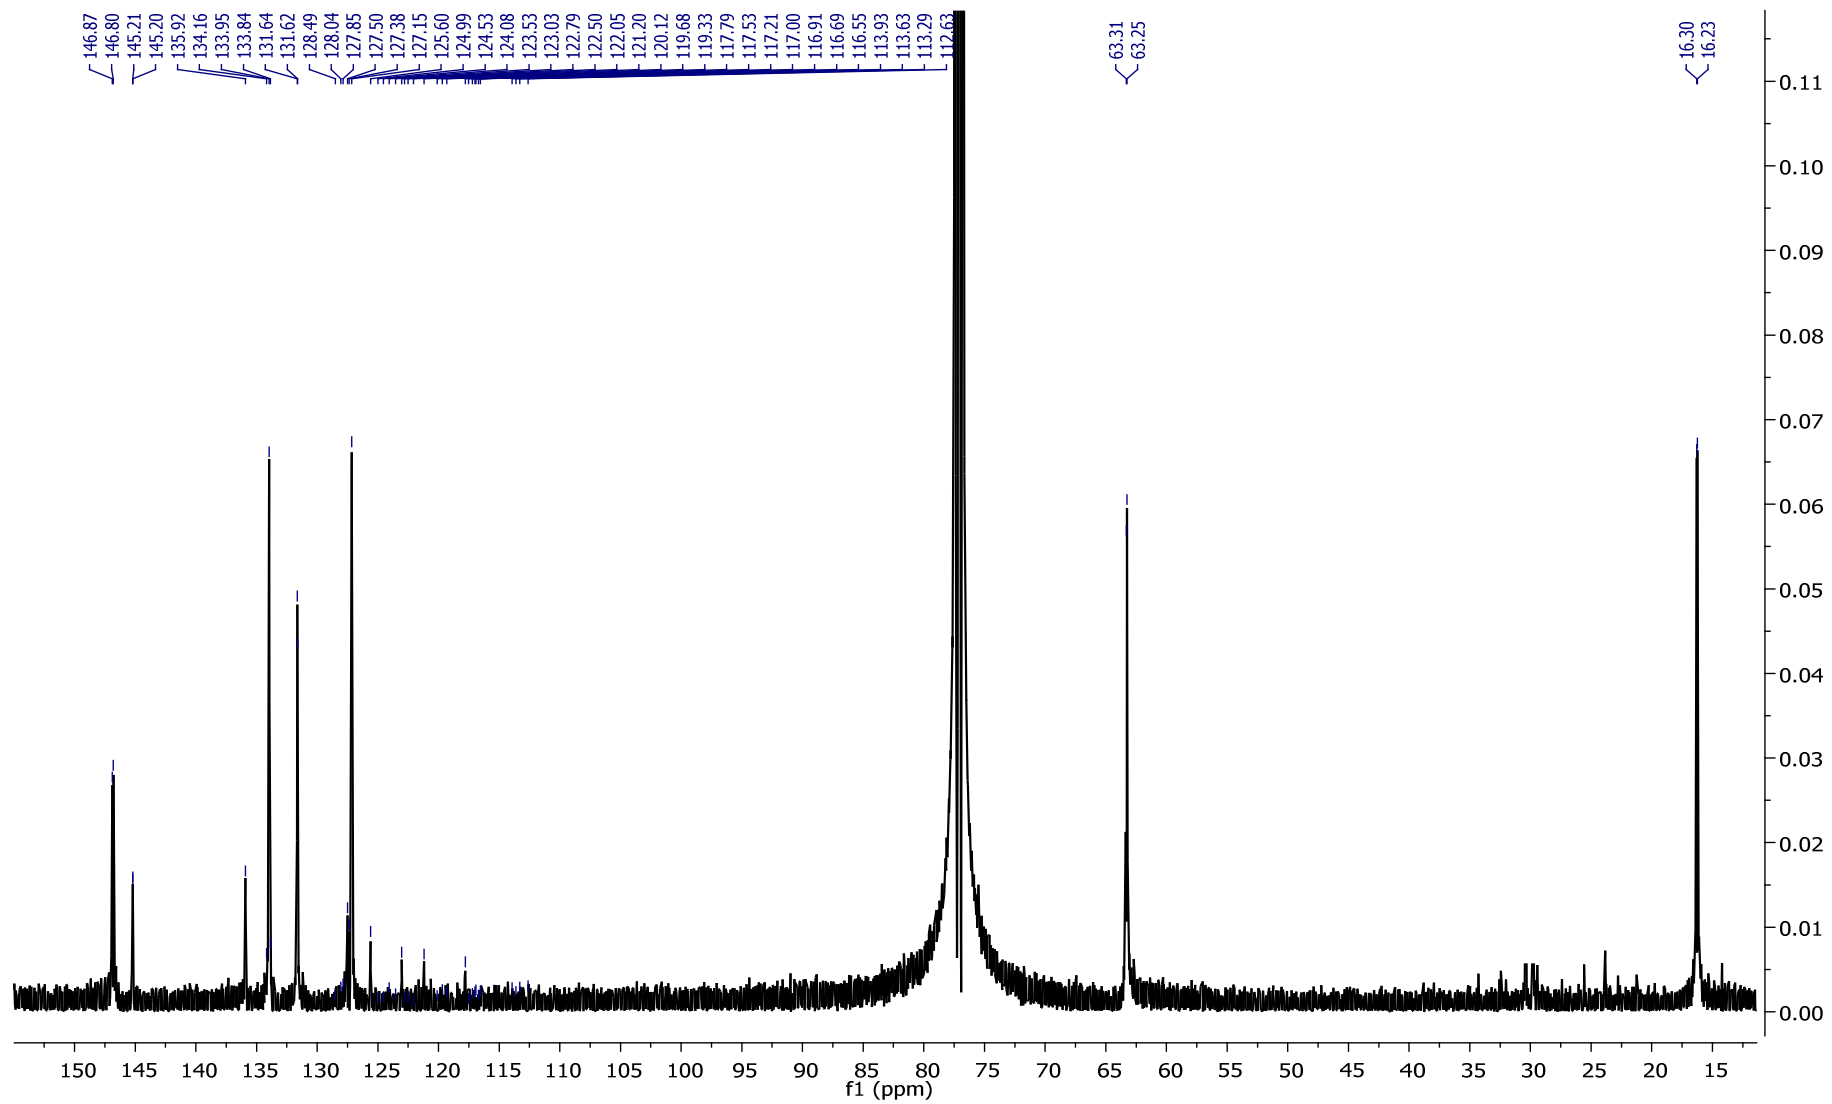

$^{19}\text{F}$  NMR

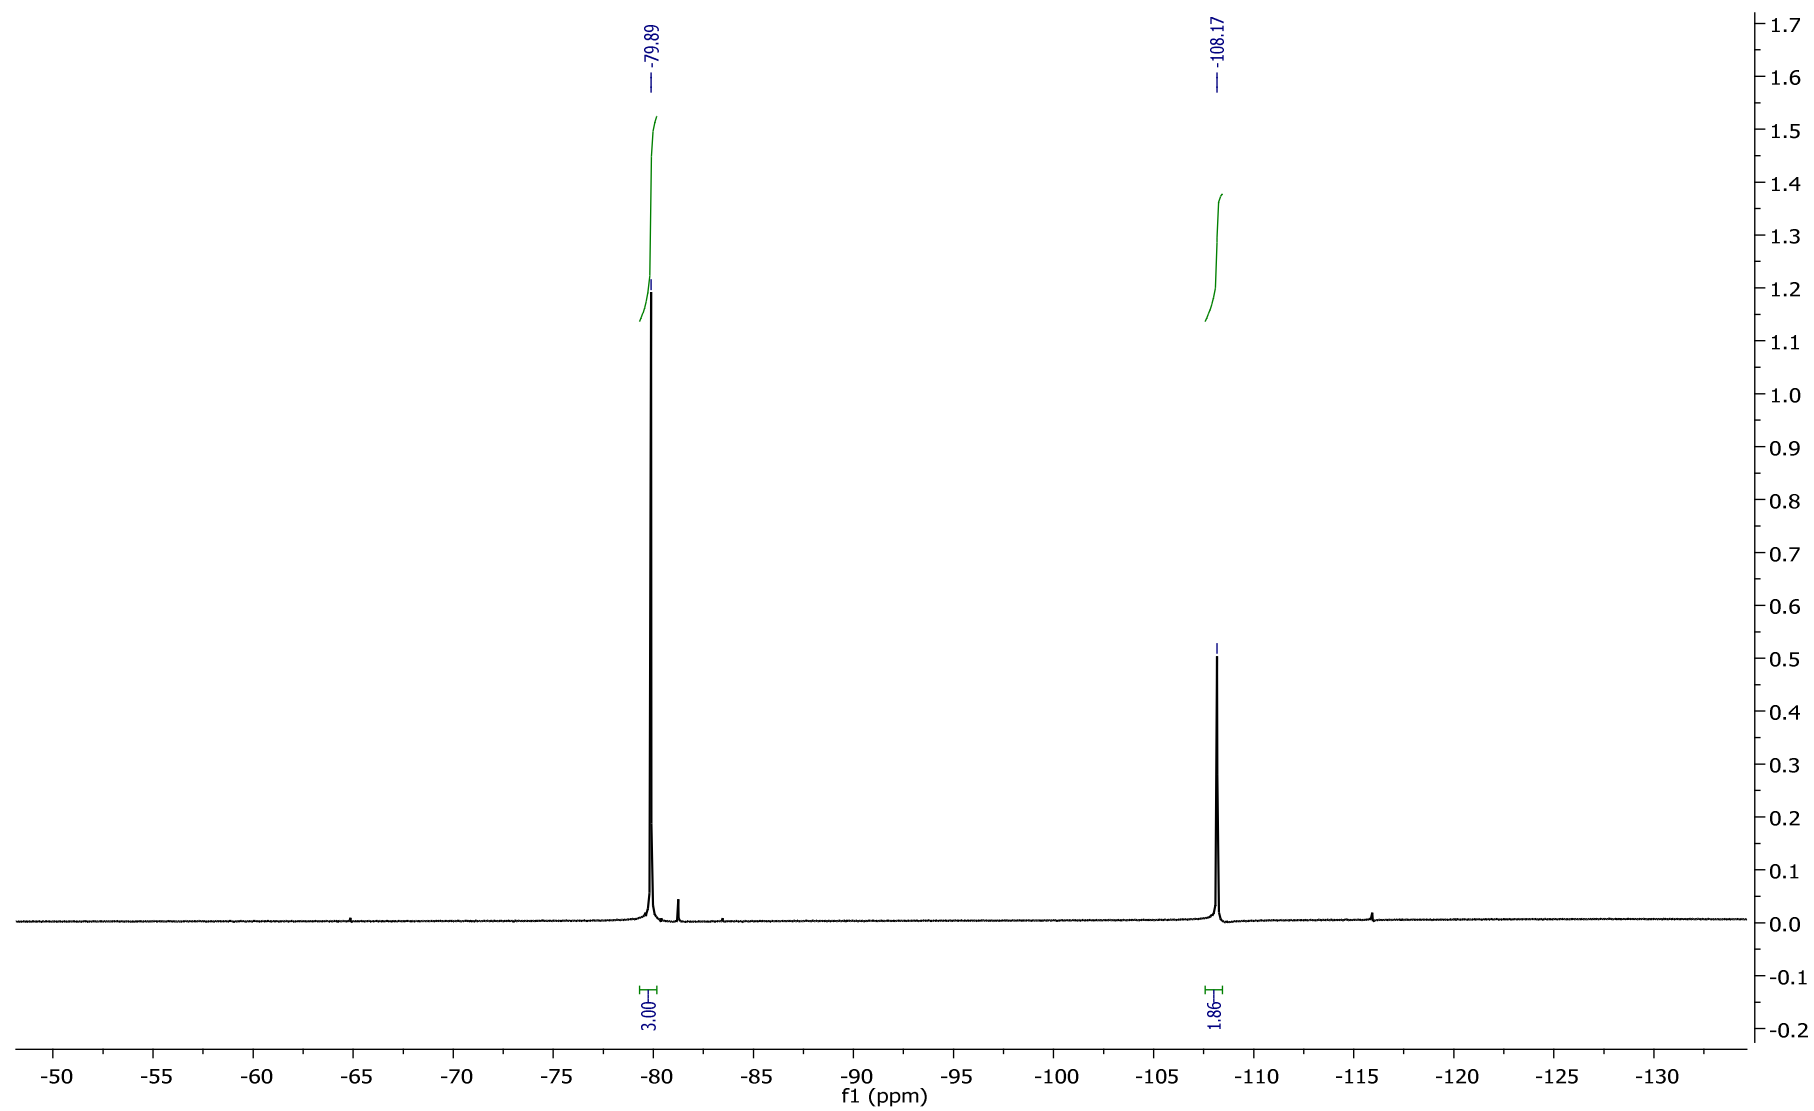

$^{31}\text{P}$  NMR

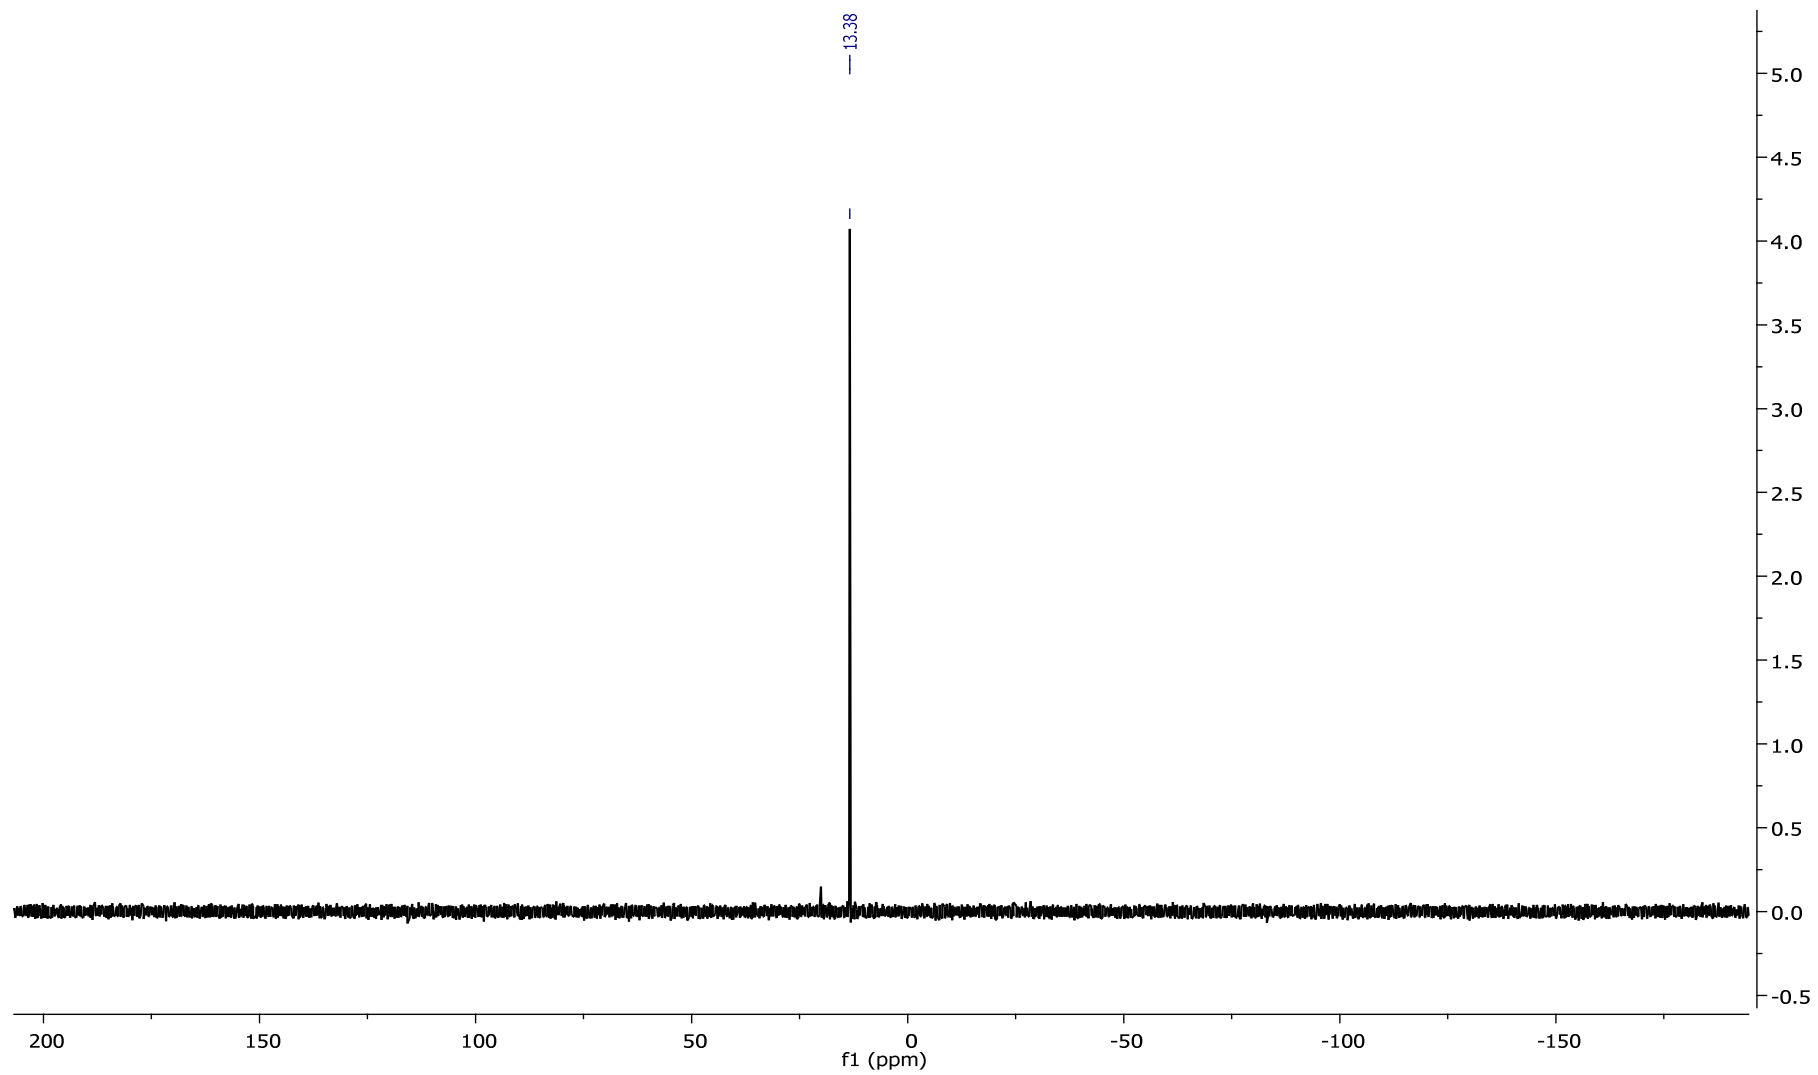

19. Diethyl (6,7-dimethoxy-2-(perfluoroethyl)quinolin-3-yl)phosphonate **4s**

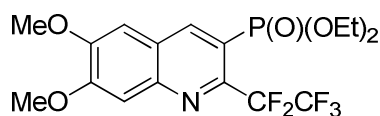

Colourless crystals (40%); Mp = 151–154 °C;  $^1\text{H}$  NMR (400 MHz,  $\text{CDCl}_3$ )  $\delta$  1.34 (t,  $J = 7.0$  Hz, 6H), 4.04 (s, 3H), 4.07 (s, 3H), 4.13 (m, 2H), 4.24 (m, 2H), 7.16 (s, 1H), 7.46 (s, 1H), 8.97 (d,  $^3J_{\text{H-P}} = 16.2$  Hz, 1H);  $^{13}\text{C}$  NMR (100 MHz)  $\delta$  16.3 (d,  $J = 6.4$  Hz), 56.4, 56.7, 62.9 (d,  $J = 5.9$  Hz), 105.3, 108.1, 111.9 (tq,  $^1J_{\text{C-F}} = 256.7$  Hz,  $^2J_{\text{C-F}} = 36.7$  Hz), 118.4 (d,  $^1J_{\text{C-P}} = 187.6$  Hz), 119.3 (qt,  $^1J_{\text{C-F}} = 288.2$  Hz,  $^2J_{\text{C-F}} = 37.9$  Hz), 123.2 (d,  $^3J_{\text{C-P}} = 11.7$  Hz), 144.6, 145.0 (d,  $^2J_{\text{C-P}} = 6.8$  Hz), 145.3 (td,  $^2J_{\text{C-F}} = 27.9$  Hz,  $^2J_{\text{C-P}} = 9.5$  Hz), 152.2, 155.3;  $^{19}\text{F}$  NMR (376 MHz)  $\delta$  -80.1 (s,  $-\text{CF}_2\text{CF}_3$ ), -108.1 (s,  $-\text{CF}_2\text{CF}_3$ );  $^{31}\text{P}$  NMR (161 MHz)  $\delta$  15.1 (t,  $^4J_{\text{F-P}} = 1.5$  Hz); HRMS (ESI): calcd for  $\text{C}_{17}\text{H}_{19}\text{F}_5\text{NNaO}_5\text{P}$   $[\text{M}+\text{Na}]^+$  466.0813, found 466.0814.



# <sup>1</sup>H NMR

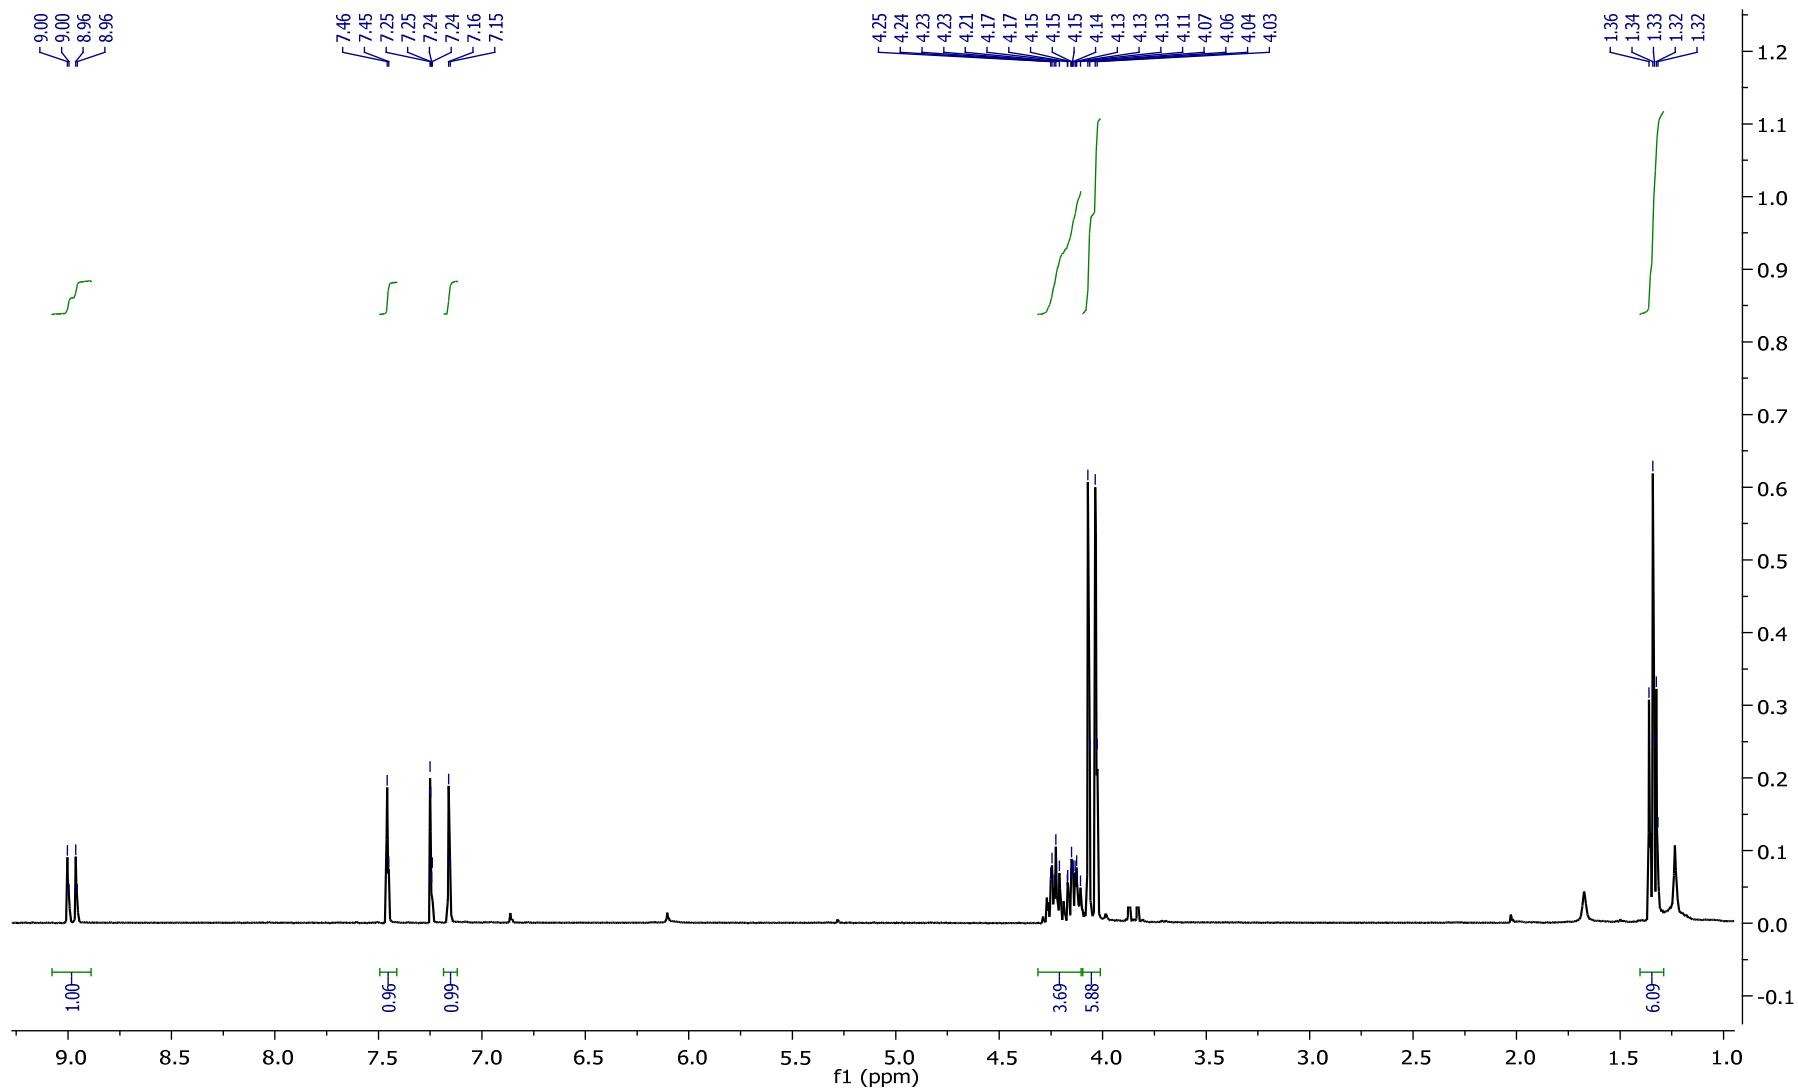

$^{13}\text{C}$  NMR

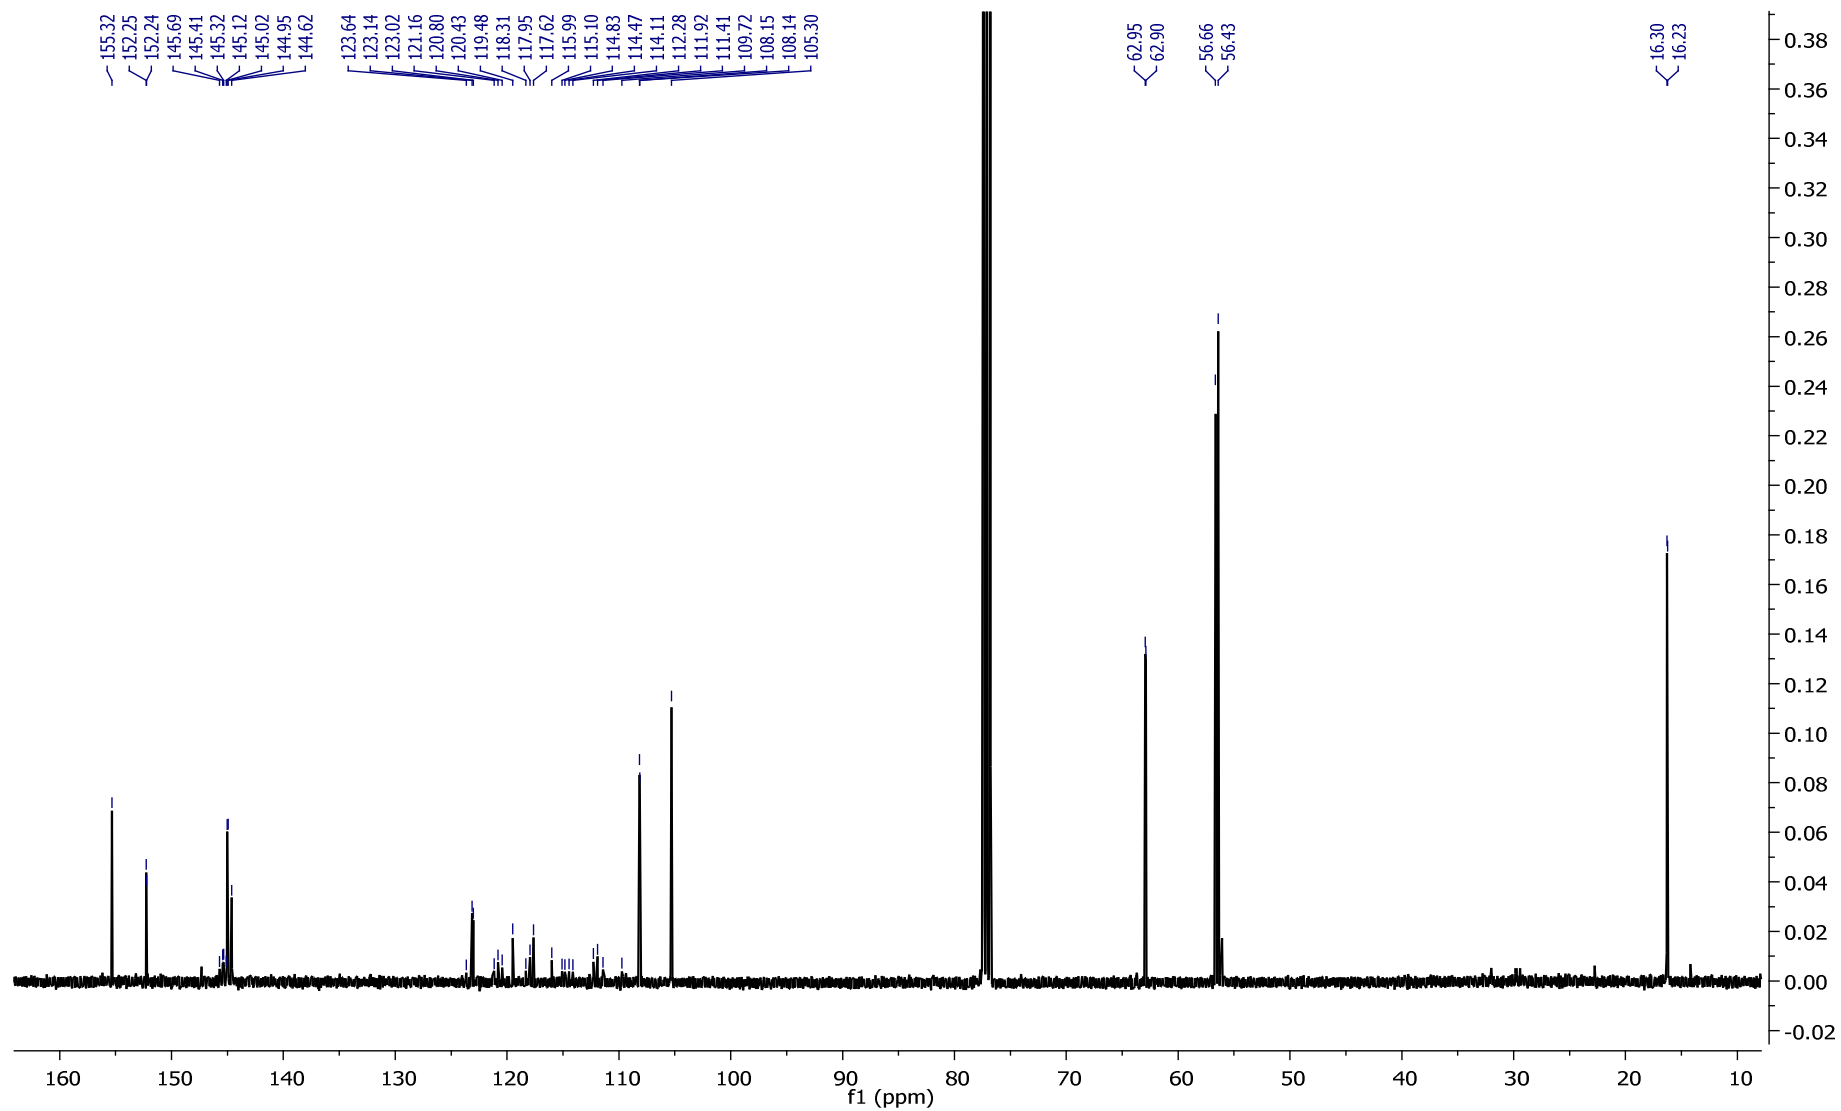

$^{19}\text{F}$  NMR

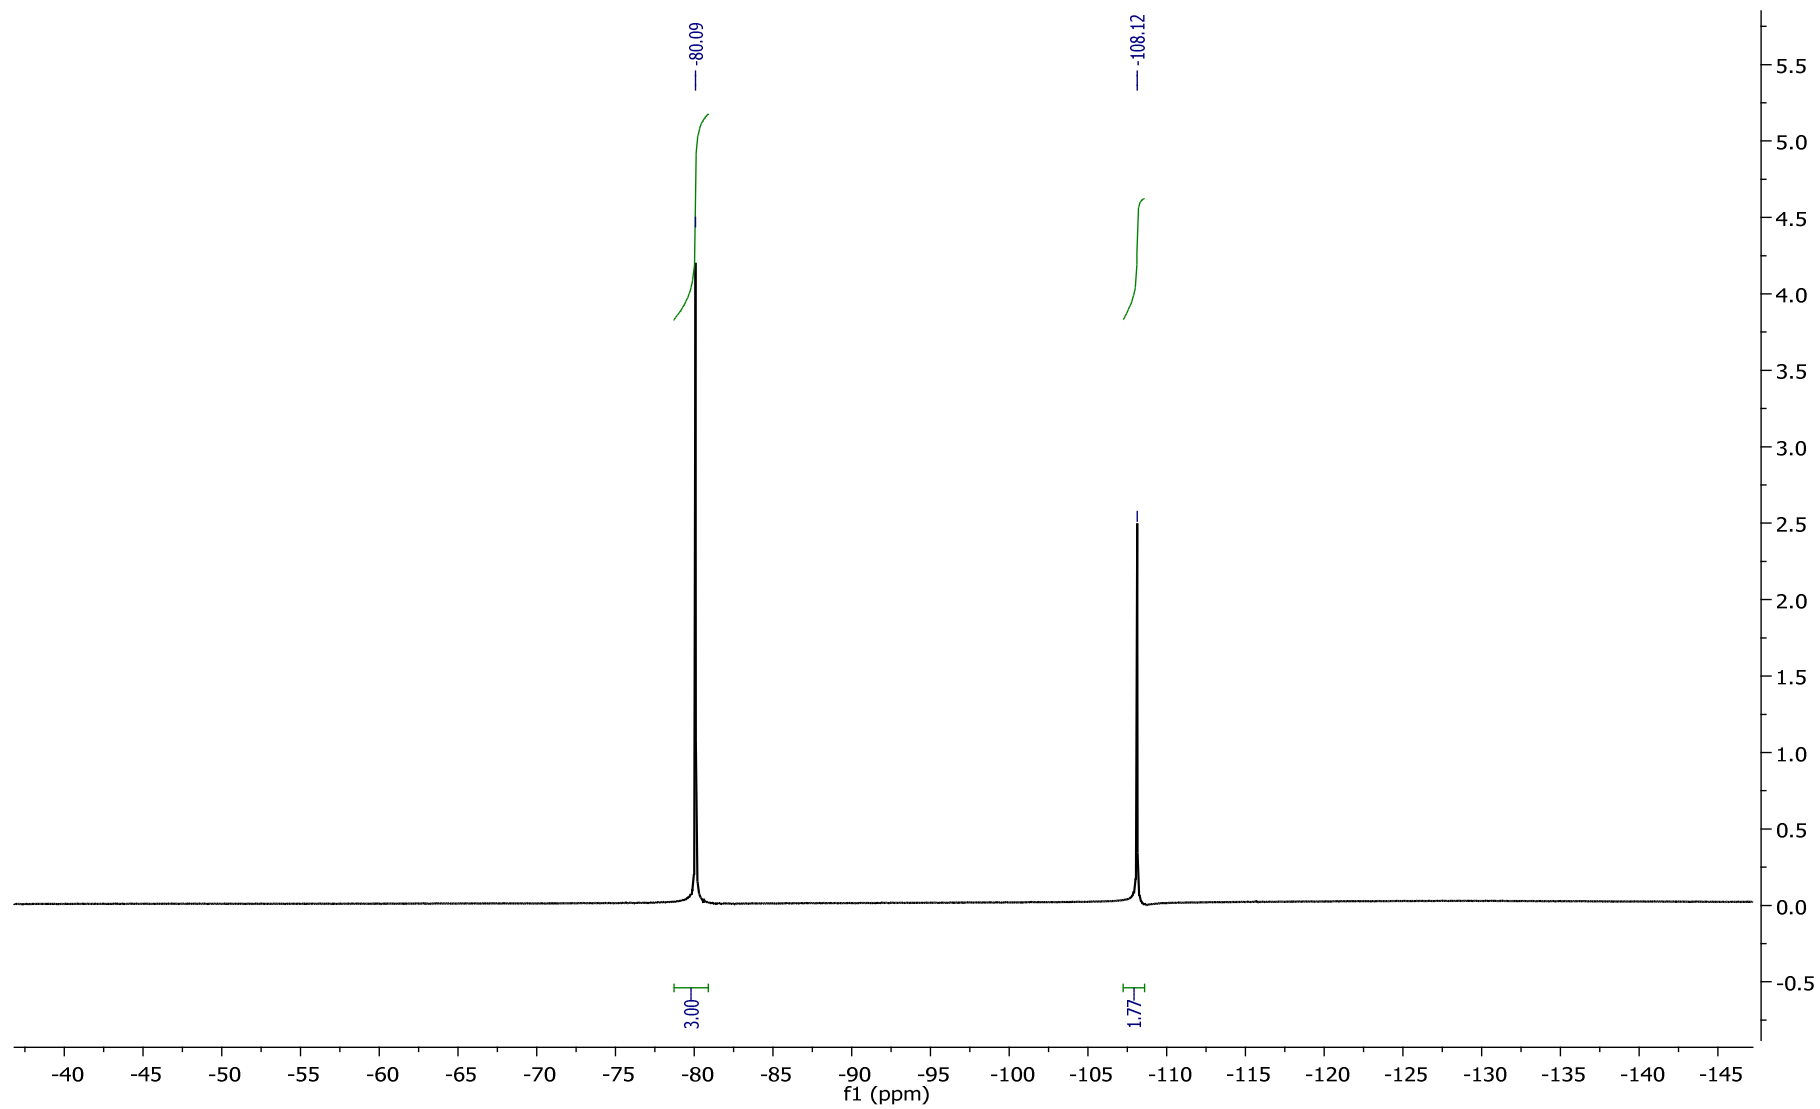

$^{31}\text{P}$  NMR

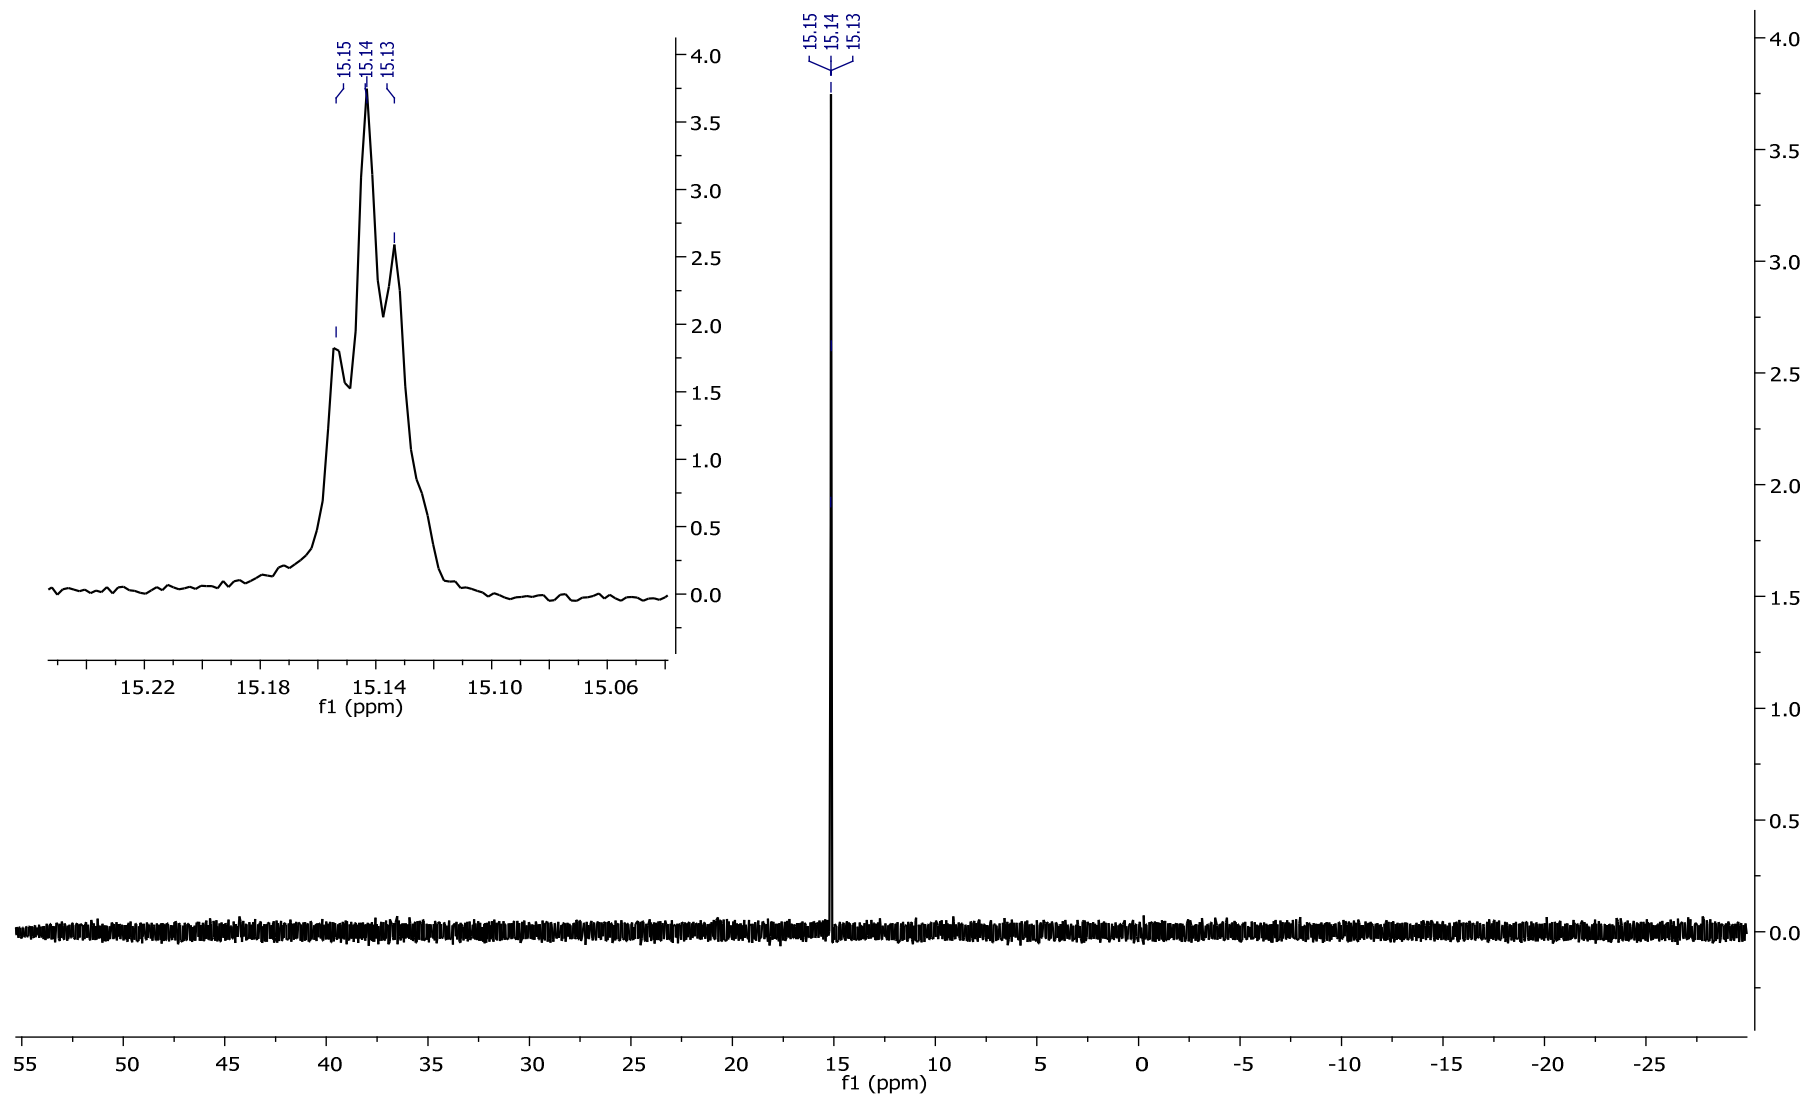

20. Diethyl (2-(perfluoroethyl)-7-(trifluoromethyl)quinolin-3-yl)phosphonate **4t**

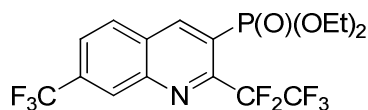

Yellowish oil (67%);  $^1\text{H}$  NMR (400 MHz,  $\text{CDCl}_3$ )  $\delta$  1.36 (t,  $J = 6.8$  Hz, 6H), 4.18 (m, 2H), 4.28 (m, 2H), 7.92 (d,  $J = 9.5$  Hz, 1H), 8.13 (d,  $J = 7.9$  Hz, 1H), 8.52 (s, 1H), 9.28 (d,  $^3J_{\text{H-P}} = 16.3$  Hz, 1H);  $^{13}\text{C}$  NMR (100 MHz)  $\delta$  16.3 (d,  $J = 6.8$  Hz), 63.4 (d,  $J = 6.4$  Hz), 112.9 (tq,  $^1J_{\text{C-F}} = 266.4$  Hz,  $^2J_{\text{C-F}} = 35.2$  Hz), 122.6 (d,  $^1J_{\text{C-P}} = 187.1$  Hz), 122.7 (qt,  $^1J_{\text{C-F}} = 288.9$  Hz,  $^2J_{\text{C-F}} = 35.6$  Hz), 123.0 (q,  $^1J_{\text{C-F}} = 276.0$  Hz), 125.5 (qd,  $^4J_{\text{C-F}} = 2.0$  Hz,  $^4J_{\text{C-P}} = 0.8$  Hz), 127.8 (qd,  $^4J_{\text{C-F}} = 5.0$  Hz,  $^4J_{\text{C-P}} = 1.3$  Hz), 128.3 (d,  $^3J_{\text{C-P}} = 12.9$  Hz), 134.7 (q,  $^2J_{\text{C-F}} = 33.8$  Hz), 145.9, 147.8 (d,  $^2J_{\text{C-P}} = 8.6$  Hz), 147.9 (td,  $^2J_{\text{C-F}} = 24.0$  Hz,  $^2J_{\text{C-P}} = 10.0$  Hz);  $^{19}\text{F}$  NMR (376 MHz)  $\delta$  -62.9 (s,  $-\text{CF}_3$ ), -79.8 (s,  $-\text{CF}_2\text{CF}_3$ ), -108.3 (s,  $-\text{CF}_2\text{CF}_3$ );  $^{31}\text{P}$  NMR (161 MHz)  $\delta$  12.9; HRMS (ESI): calcd for  $\text{C}_{16}\text{H}_{14}\text{F}_8\text{NNaO}_3\text{P}$   $[\text{M}+\text{Na}]^+$  474.0574, found 474.0569.

# <sup>1</sup>H NMR

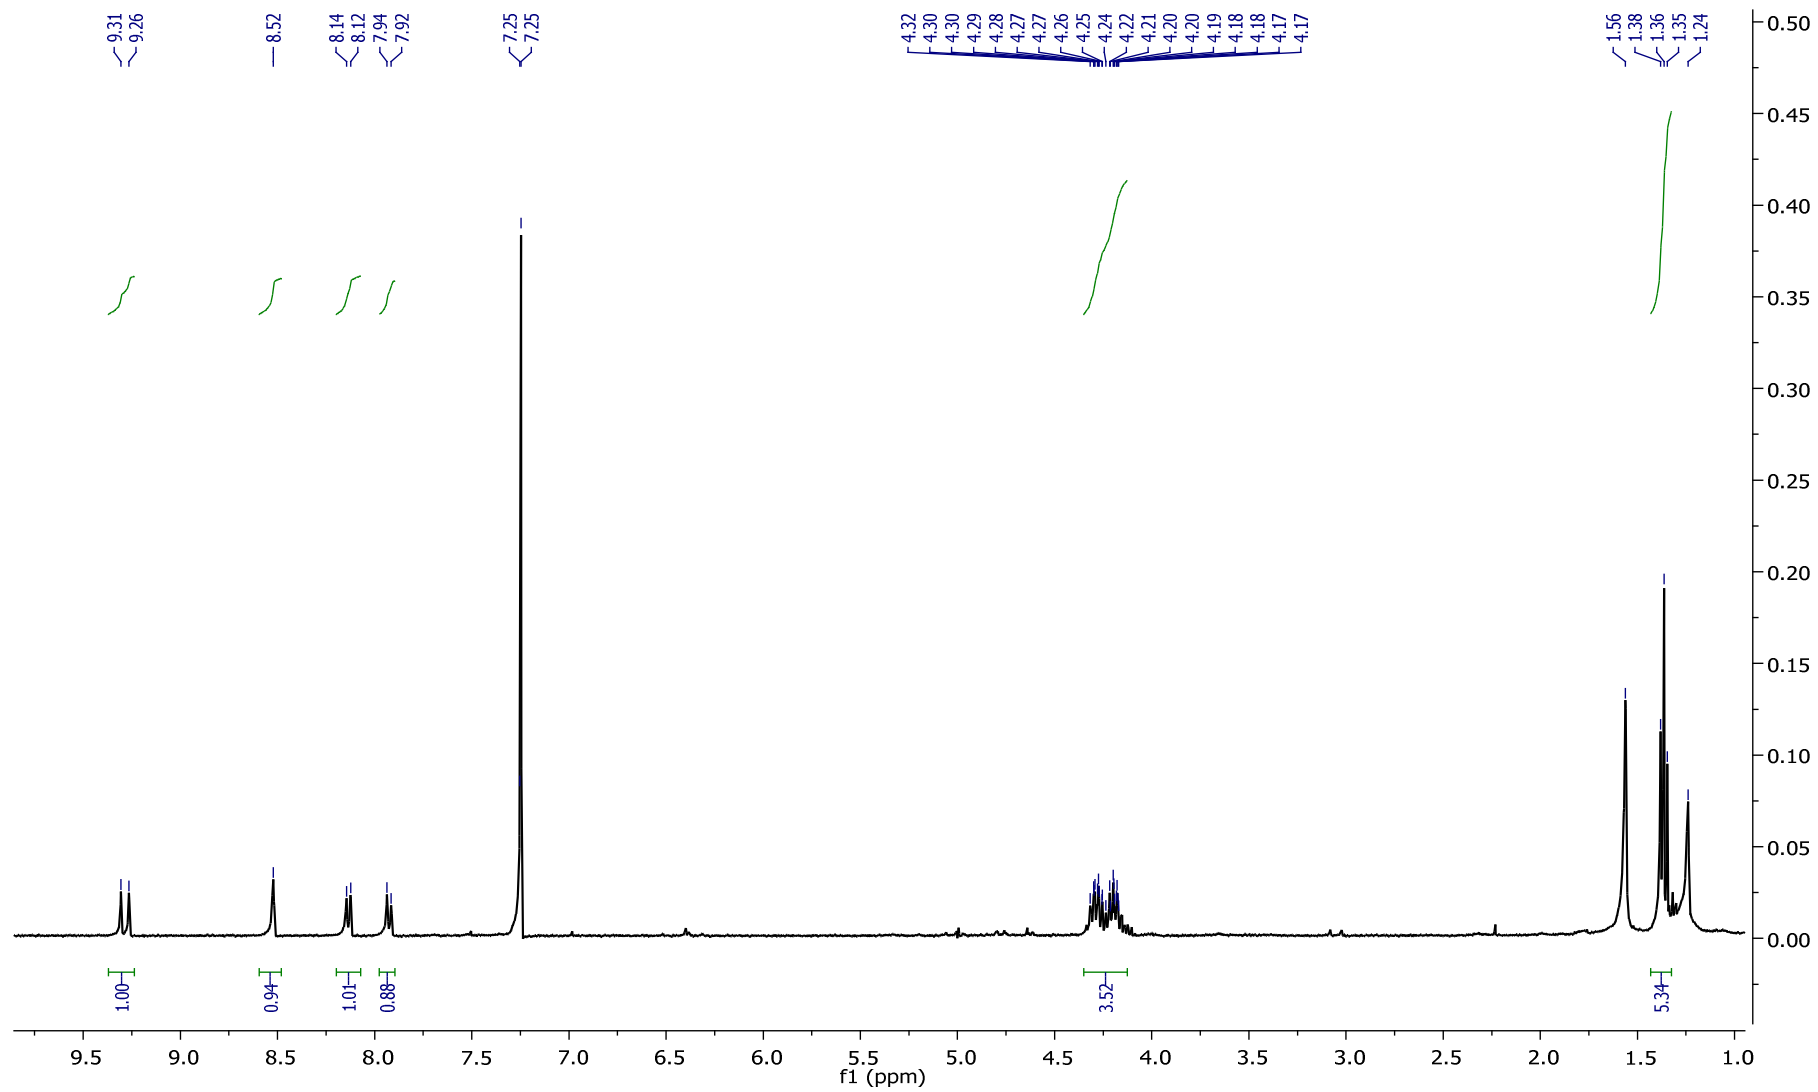

# $^{13}\text{C}$ NMR

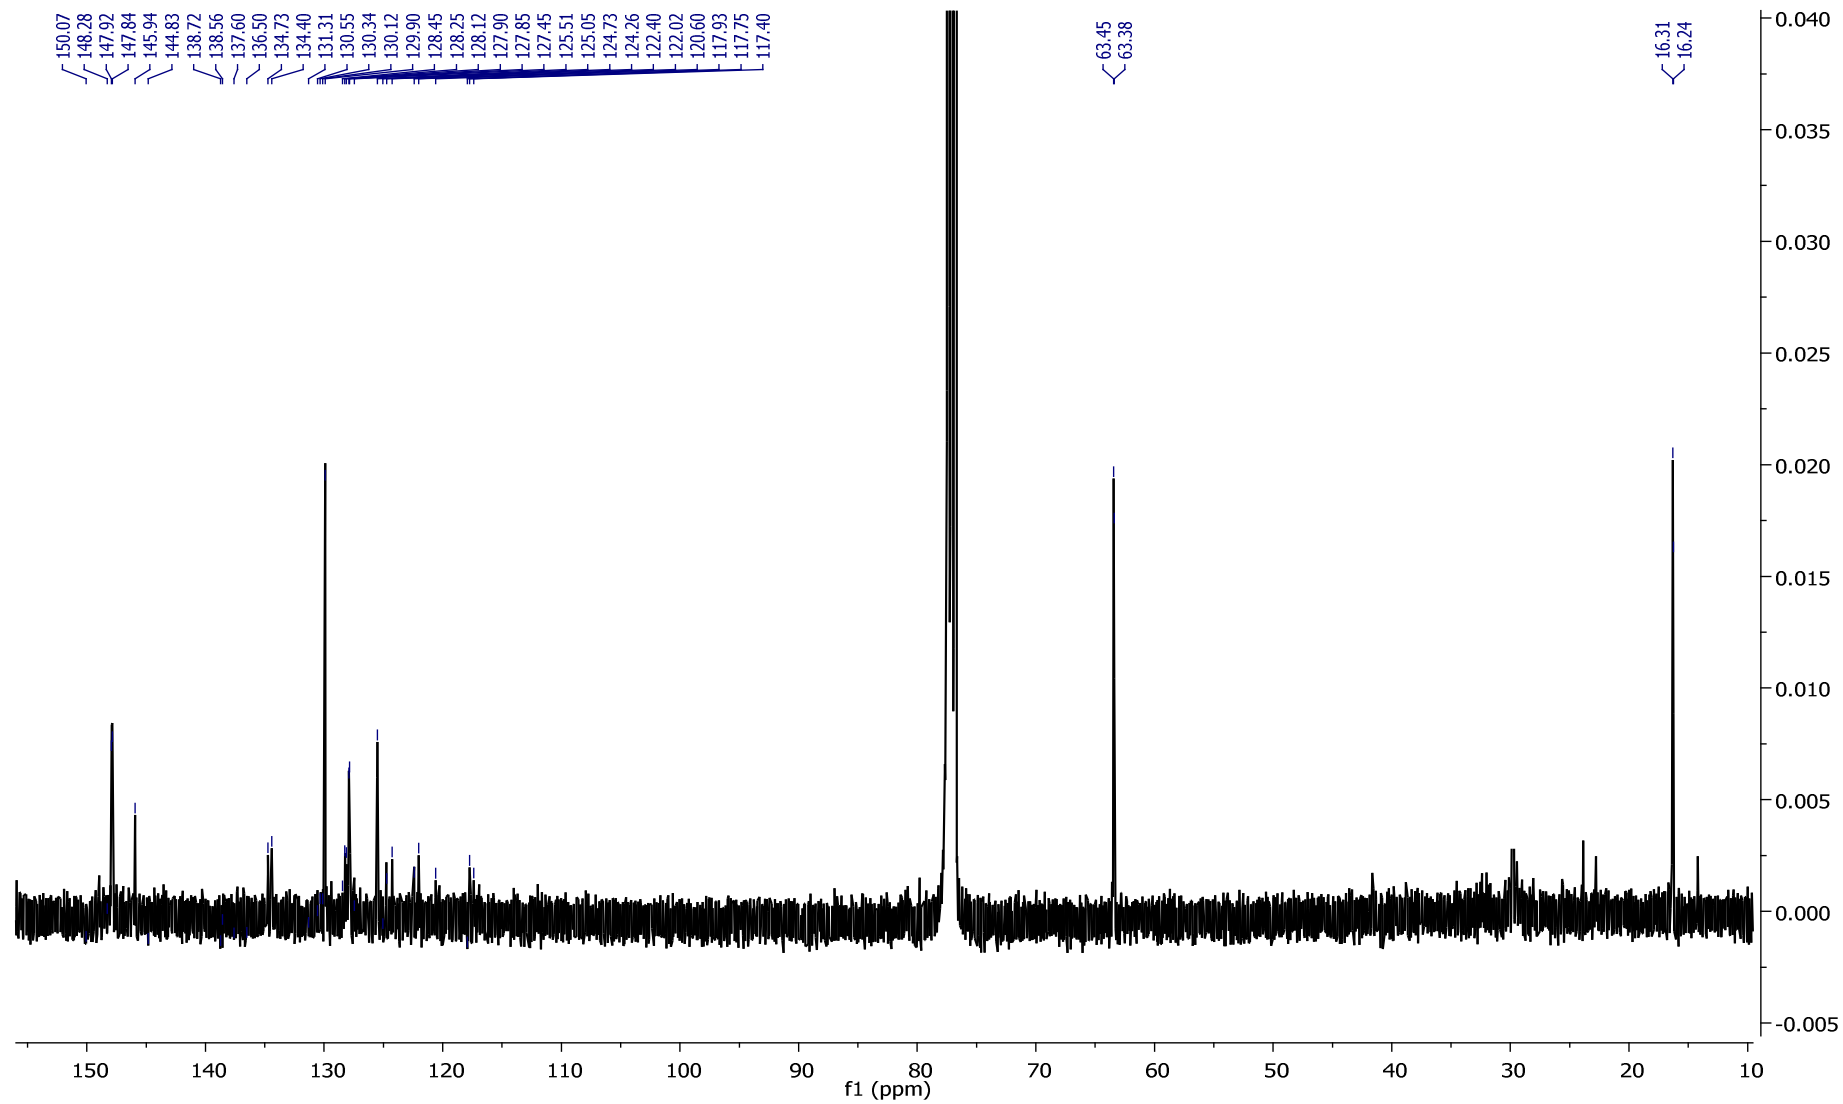



$^{19}\text{F}$  NMR

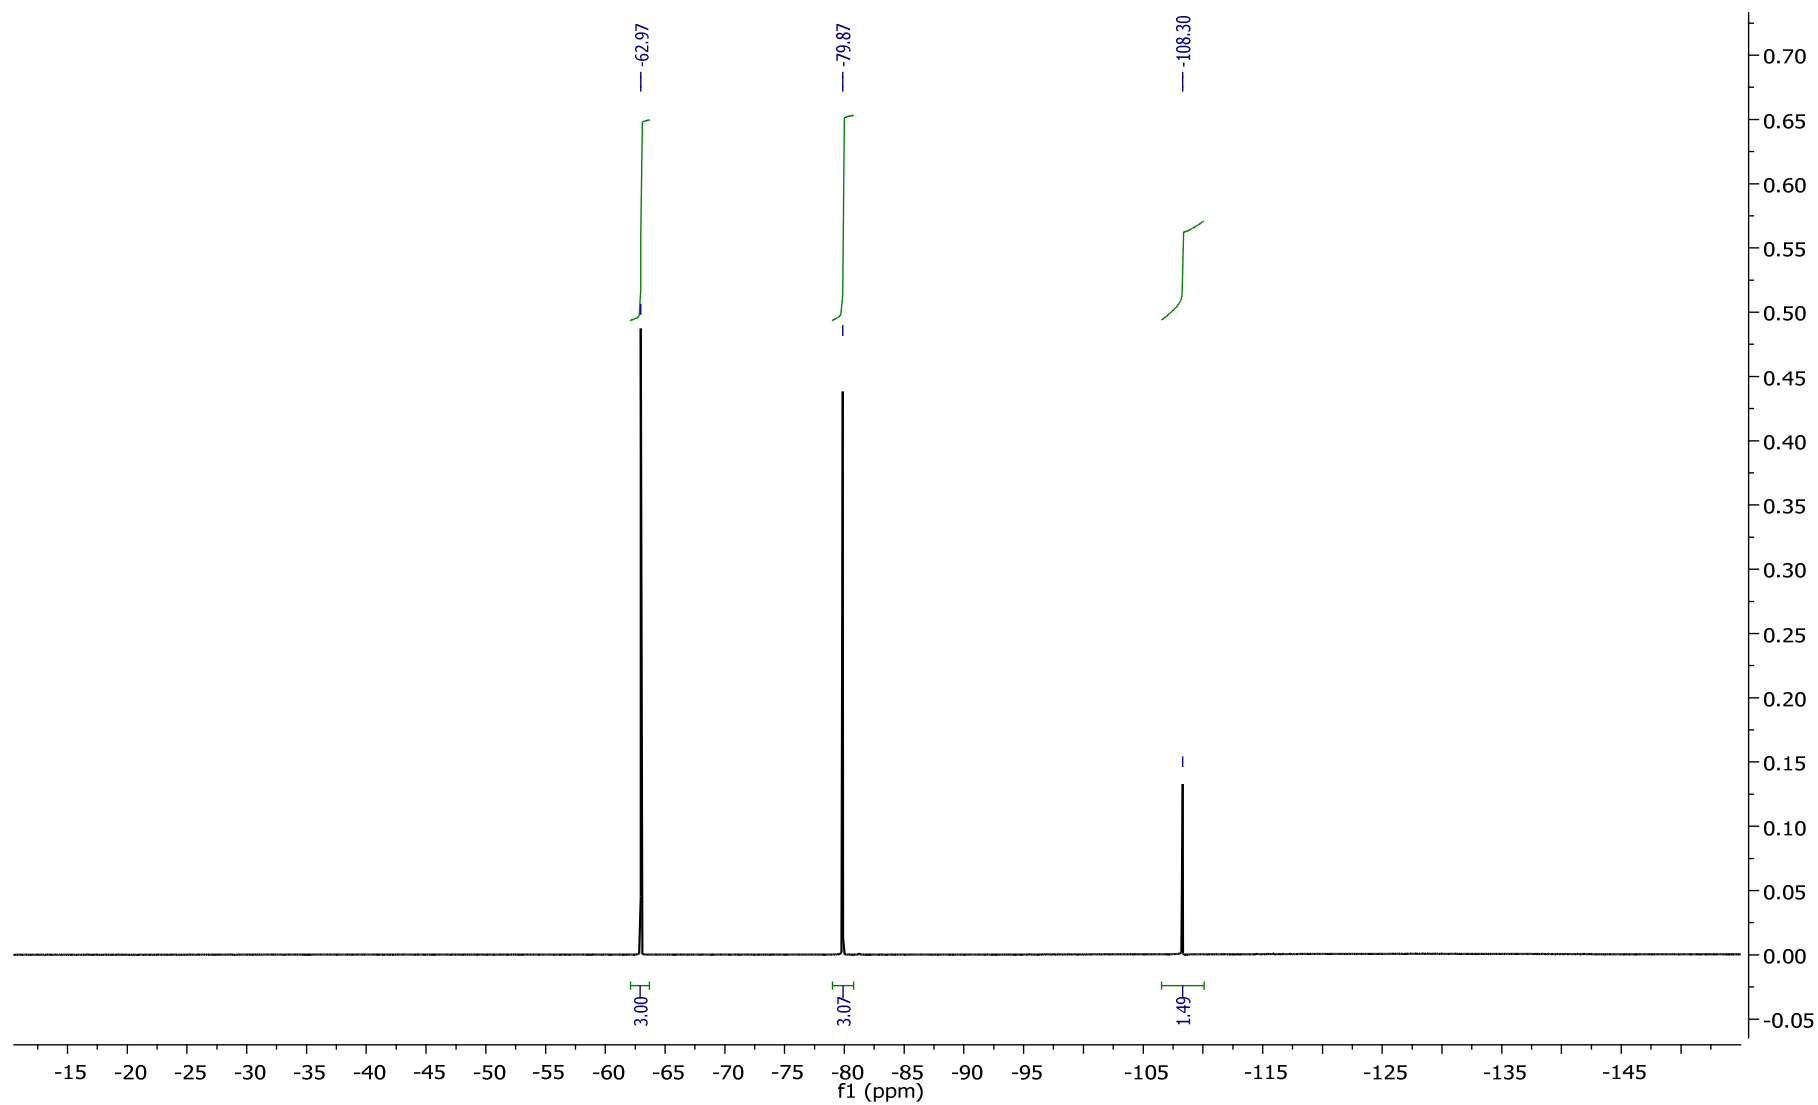

$^{31}\text{P}$  NMR

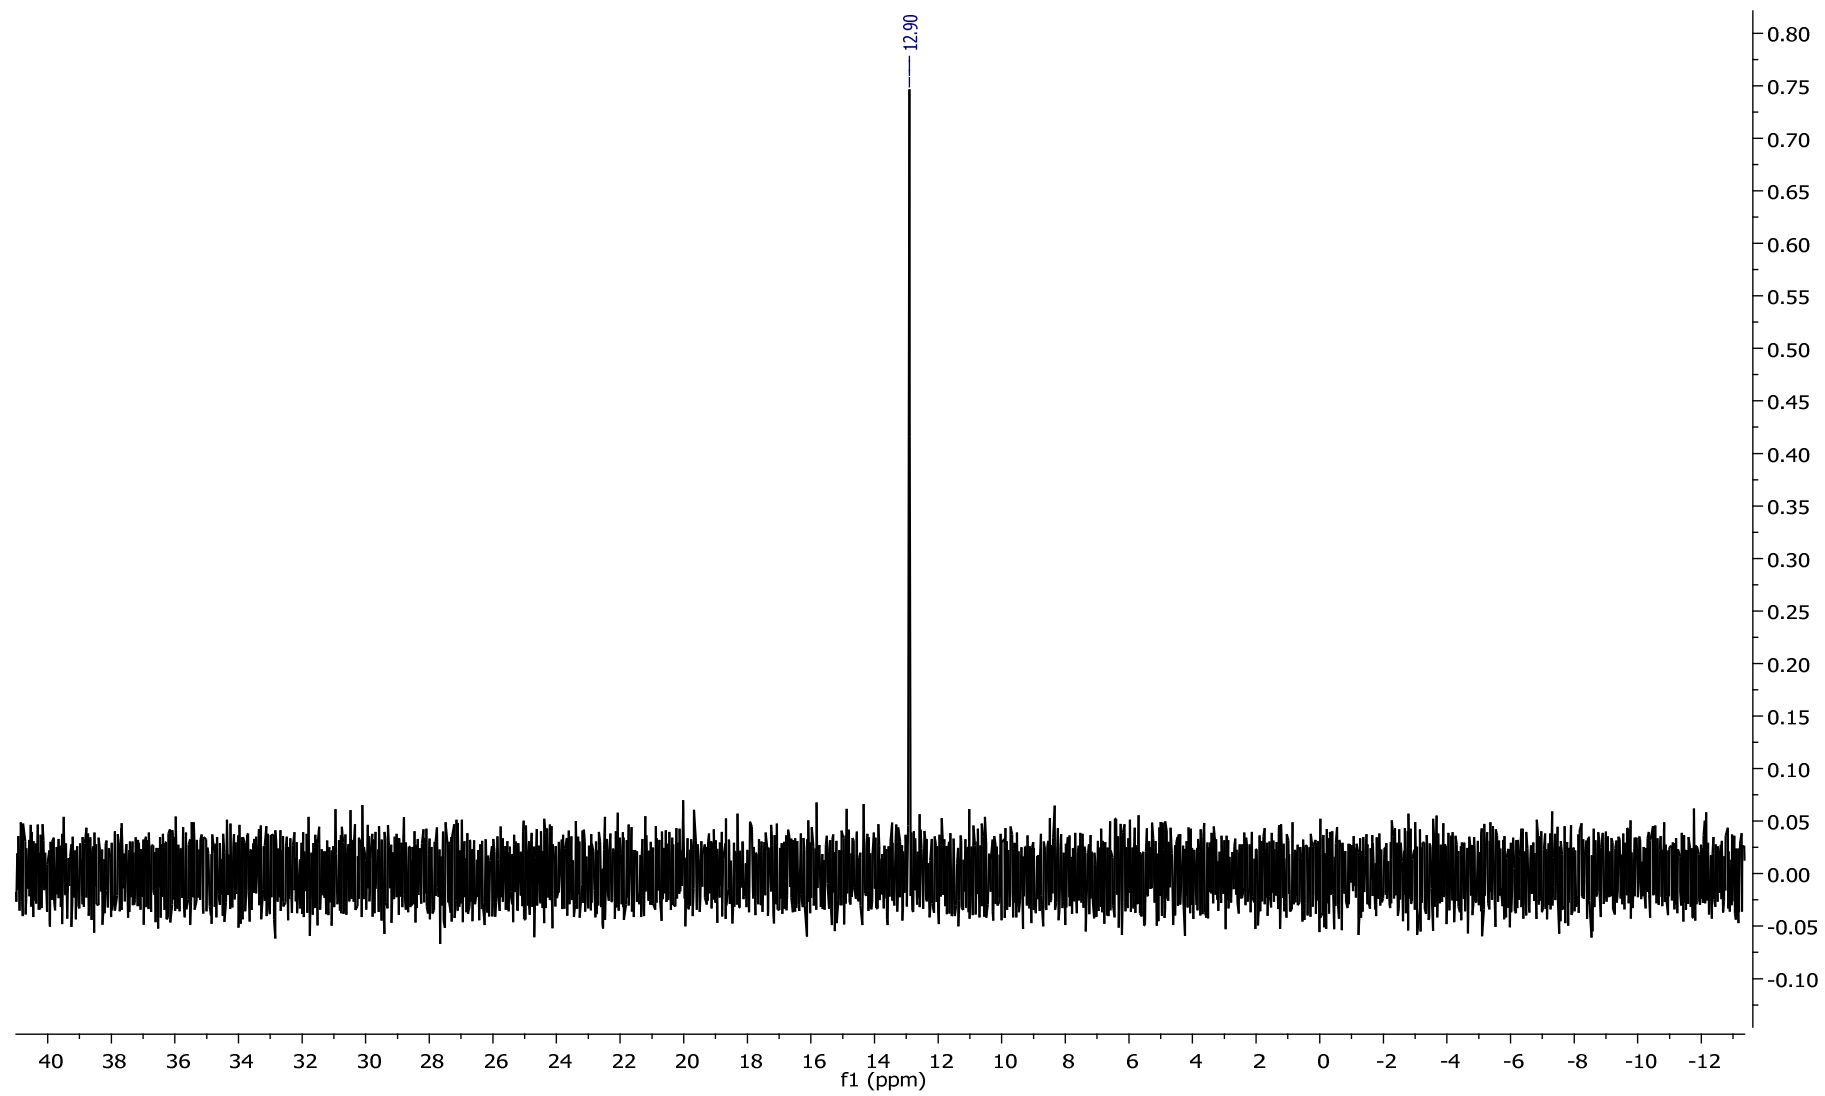

Supplement: c2ra21212a.pdf [file c2ra21212a.pdf]
